# Supplementary material for: Pre-vaccination inflammation and B-cell signalling predict age-related hyporesponse to hepatitis B vaccination
Source: Nat Commun. 2016 Jan 8;7:10369. doi: 10.1038/ncomms10369 (PMC4729923; doi:10.1038/ncomms10369)
Supplement: Supplementary Information — Supplementary Figures 1-7 and Supplementary Tables 1-5 [file ncomms10369-s1.pdf]

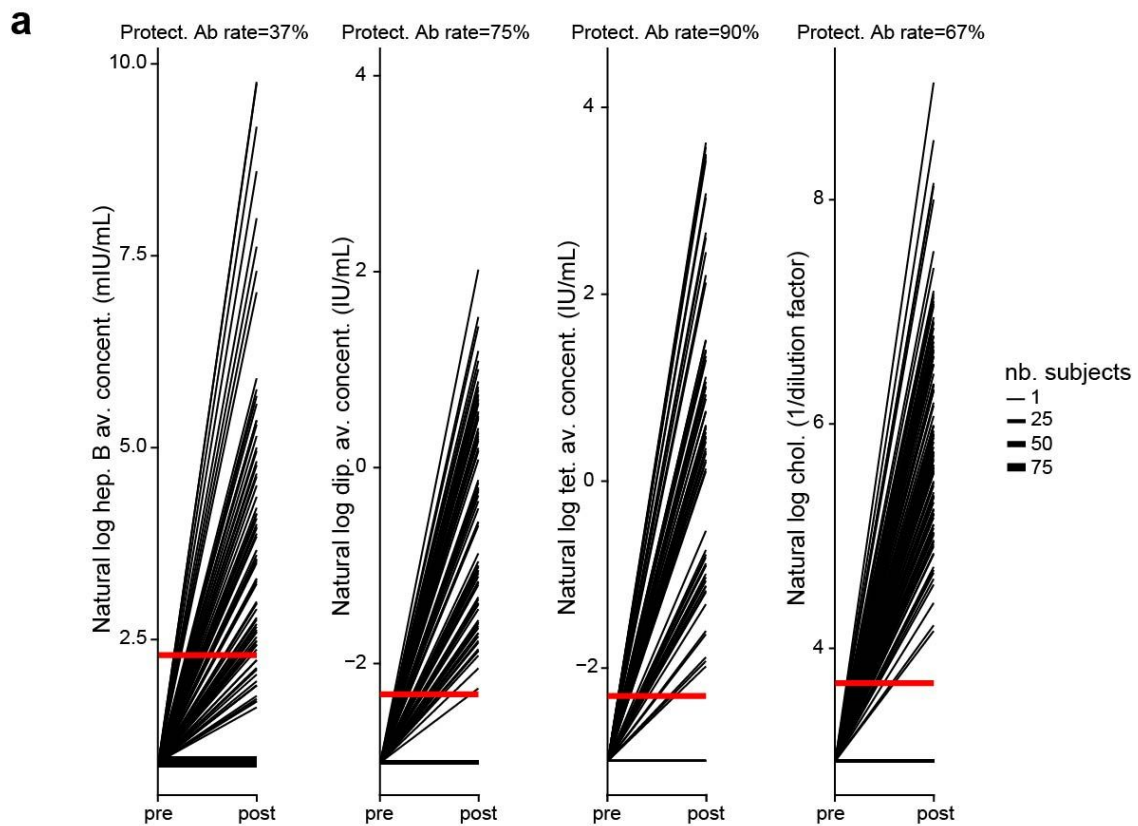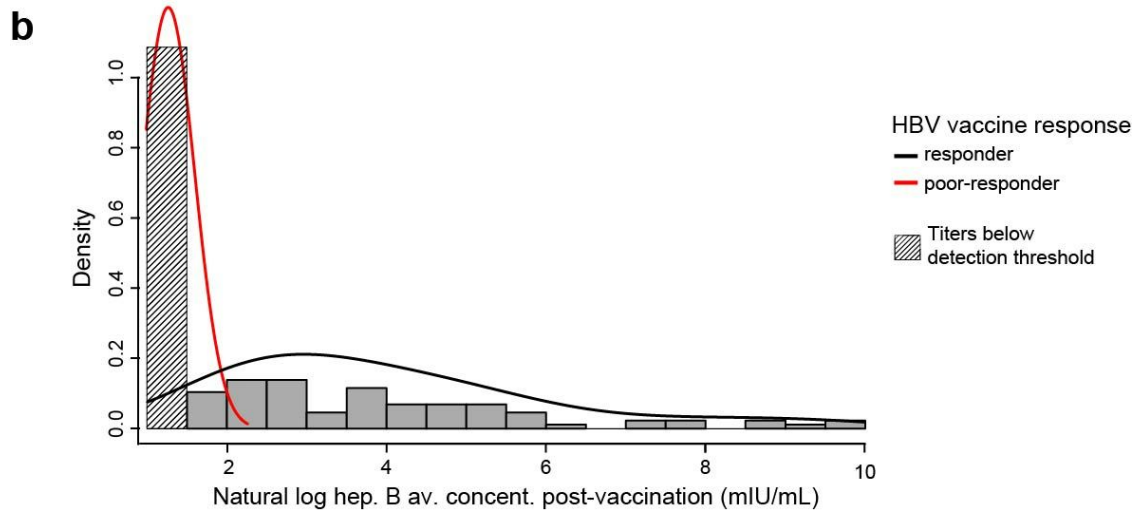

**Supplementary Figure 1. Two groups of responders to the HBV vaccine can be identified based on the antibody response titers**

(a) Response plots showing antibody titers as function of the vaccination status (x-axis: before and after receiving the vaccines). The analysis was restricted to subjects with undetectable titers pre-vaccination (hep. B: n= 170, dip: n=105, tet: n=67 and chol: n=151). The titers for HBsAg (hep. B), diphtheria toxin (dip.), tetanus toxin (tet.) and cholera toxin (chol.) are given on natural log scale. The unit of every titer is given in the y-axis label. Red horizontal lines indicated standard titer cutoffs used to define protective antibody levels. The percentage of patients having antibody titers above the protective thresholds (Protect. Ab) post-vaccination is indicated above each plot. (b) Density of the anti-HBsAg levels detected post-vaccination. Ab titers are given in mIU/mL in natural log scale space. 94 of the 174 subjects (54%) present Ab titers below the detection threshold of 5 mIU/mL while 79 subjects presented Ab titers ranging between 5.07 to 17,311.4 mIU/mL. Kernel density estimation of the Ab titers revealed two groups of responders based on Ab titers, HBV vaccine poor-responders (red line) with Ab titers below the detection threshold and HBV vaccine responders (black line) with Ab titers above 5 mIU/mL.

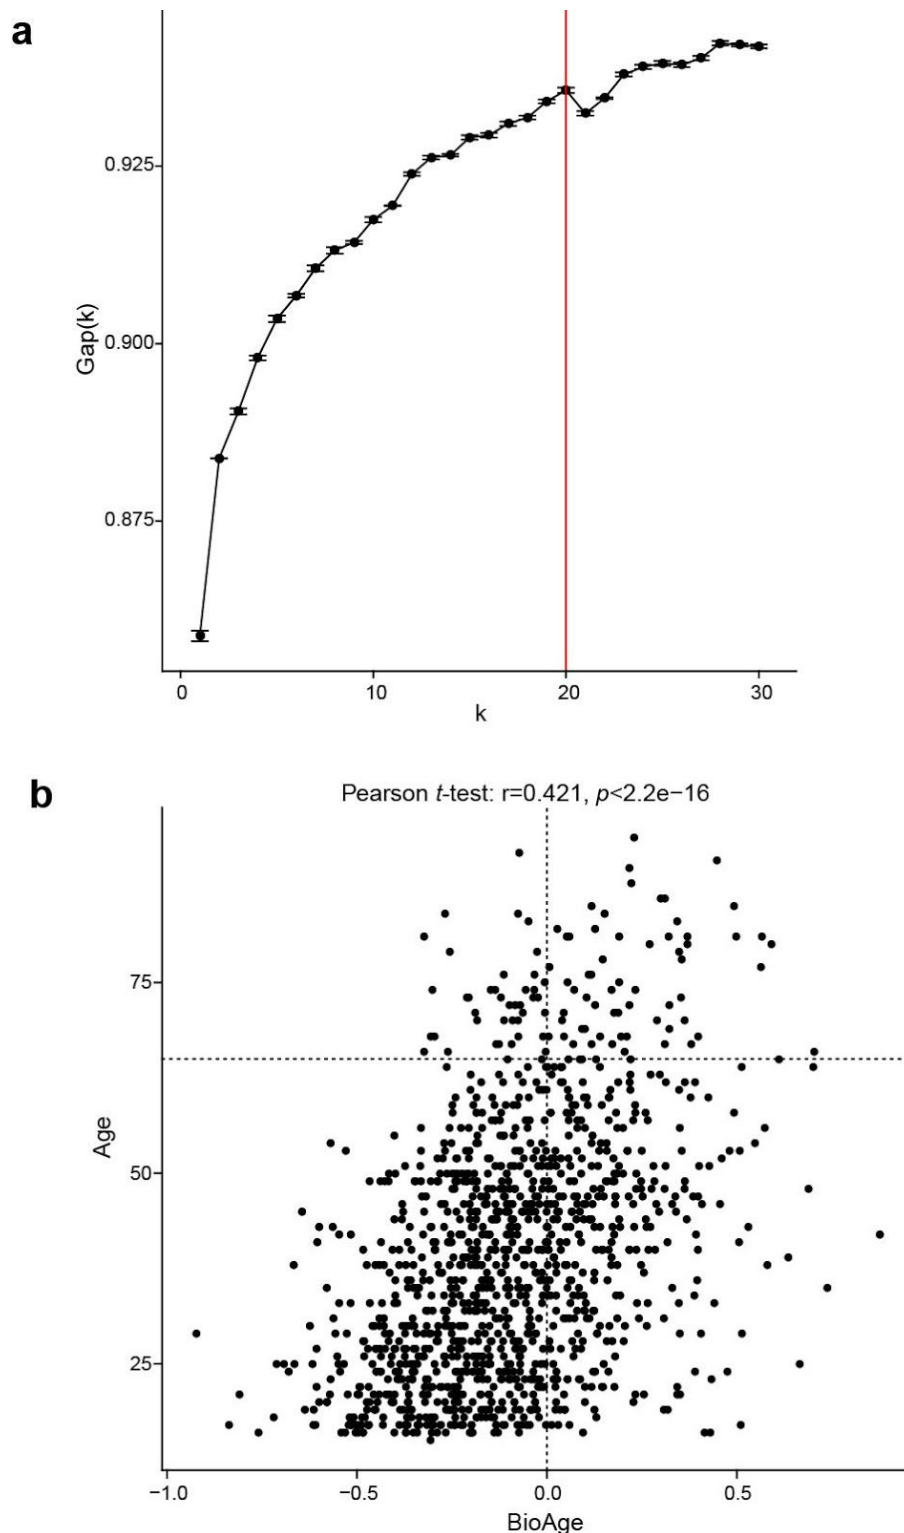

### Supplementary Figure 2. Development of the BioAge signature on the SAFHS cohort

(a) Scatter plot showing the gap statistic estimation of the optimal number of cluster of genes among the 2285 genes correlated to age on the SAFHS cohort. The x-axis corresponds to the different number of clusters tested and the y-axis corresponds to the gap statistic (Gap) and its 95% confidence interval. The gap statistic corresponds to the between-clusters variance divided by the intra-cluster variance (the greater the gap statistic the better the fit). The optimal number of clusters was obtained following the rule described in Tibshirani *et al.* defined as the smallest  $k$  such that  $\text{Gap}(k) \geq \text{Gap}(k+1) - \text{sd}(k+1)$ . Consequently, twenty clusters were identified as the optimal number of clusters of genes. (b) Scatter plot showing the chronological age as a function of the BioAge on the SAFHS dataset. Among the 109 donors aged 65 or over (which is the population with the same age range as the elderly in EM131), 42 (39%) have a young BioAge (BioAge < 0) while 67 (61%) have an old BioAge (BioAge  $\geq$  0).

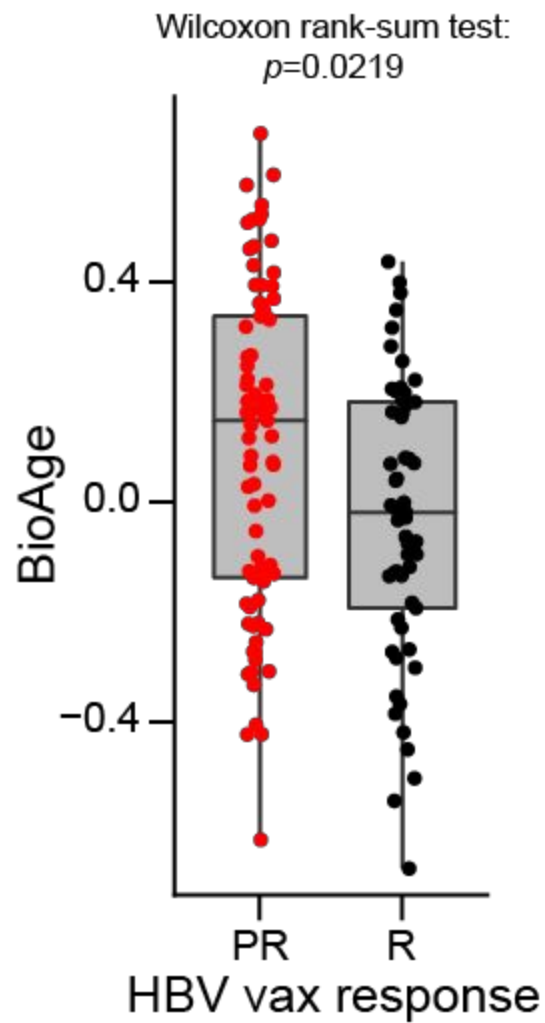

**Supplementary Figure 3. Boxplot showing the BioAge score as a function of HBV vaccine response on the EM131 elderly cohort**

A Wilcoxon rank-sum test was used to test for statistical difference in BioAge between HBV vaccine responders (R) and poor-responders (PR), the  $p$ -value is presented above the boxplot.

# 10-fold cross-validation [EM131 training set]

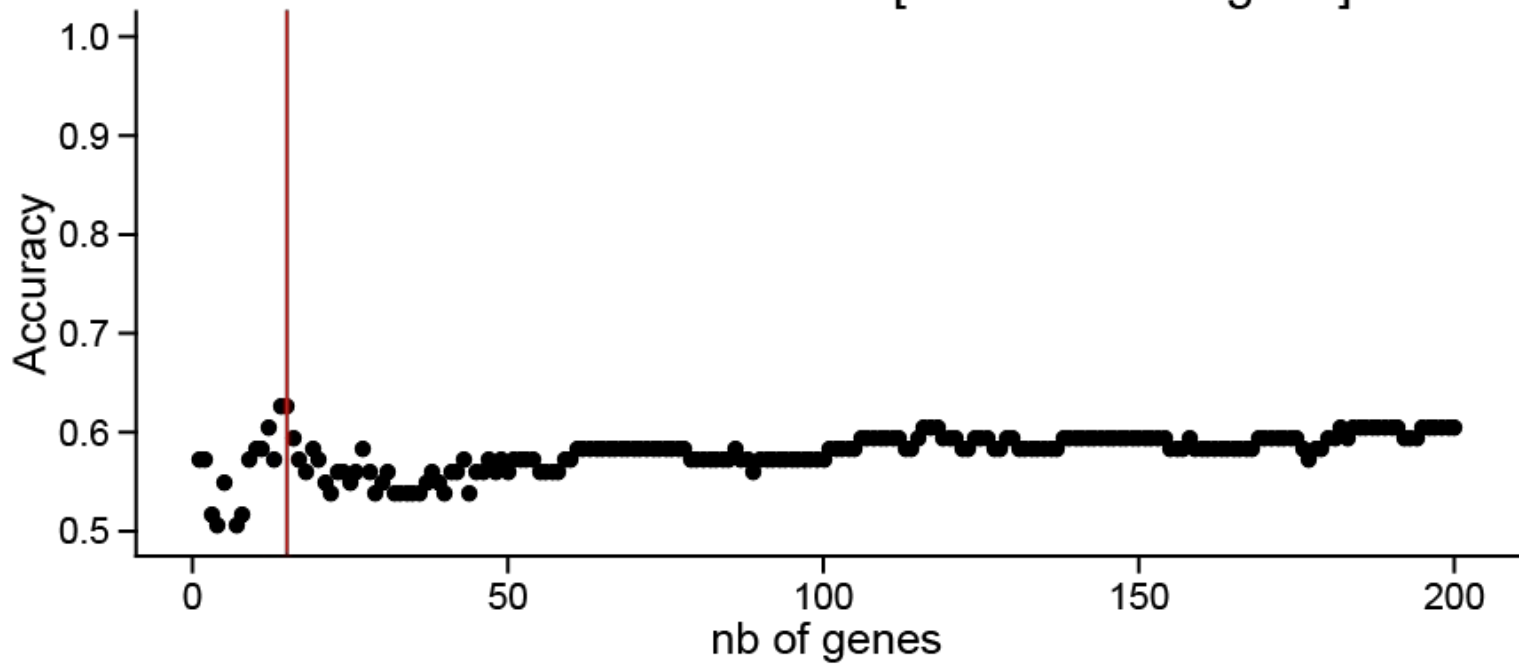

**Supplementary Figure 4. Scatter plot showing the results of the 10-fold cross-validation on the EM131 training set.**

The red line corresponds to naïve Bayes classifier of 15 genes, which gave an estimated accuracy of 62.6% accuracy.

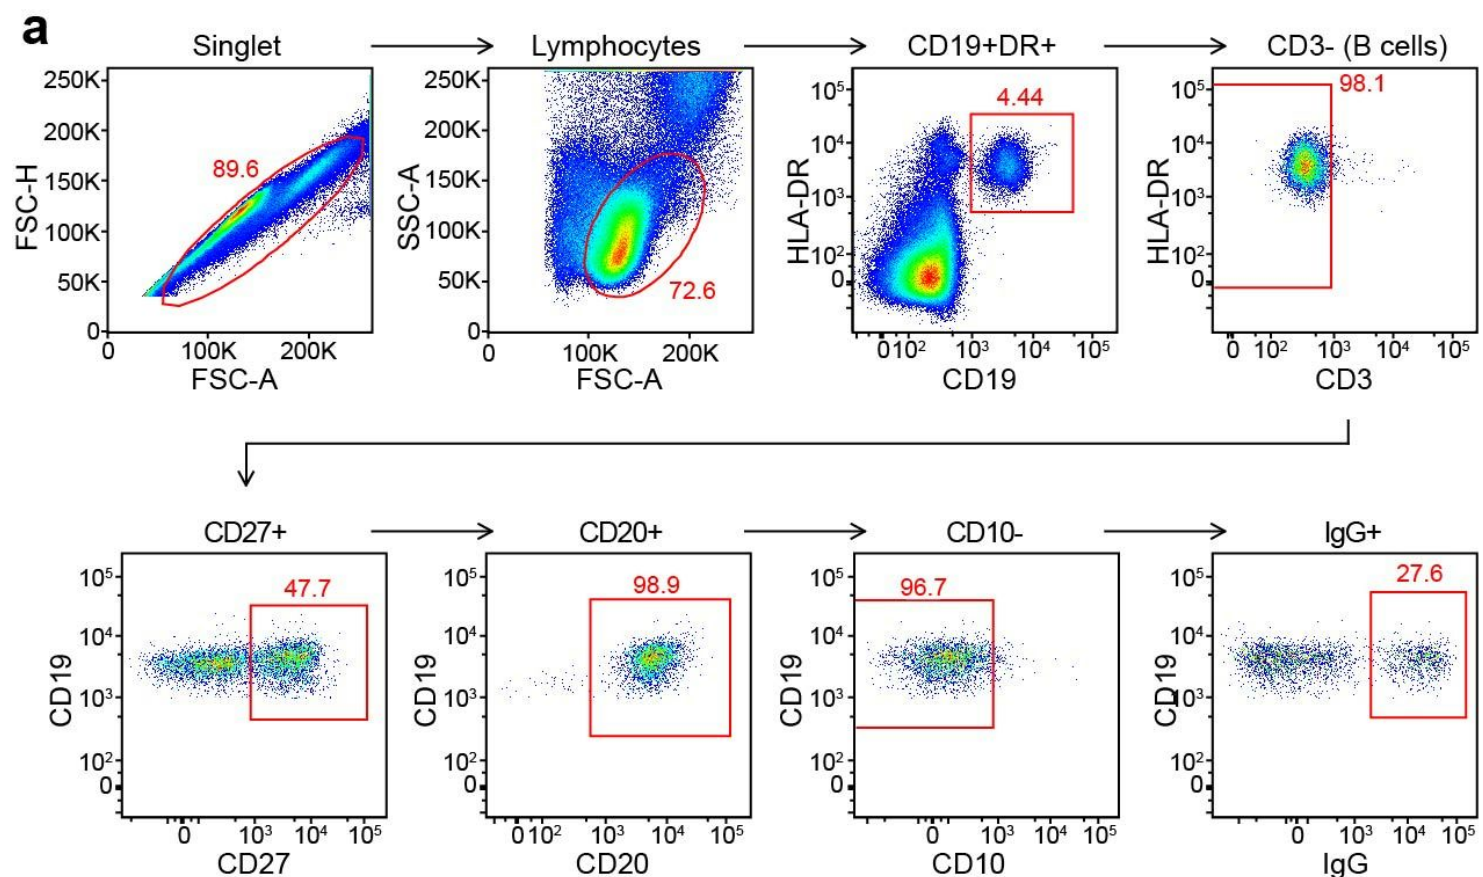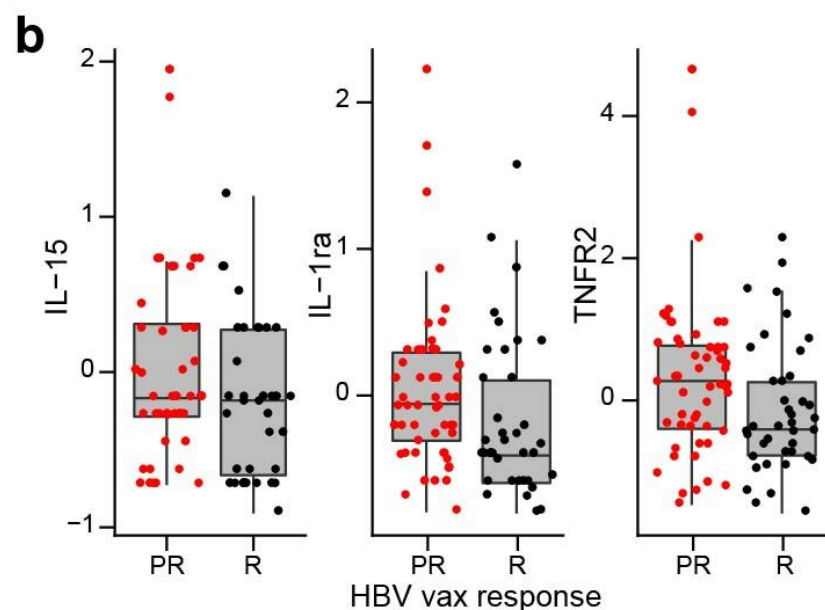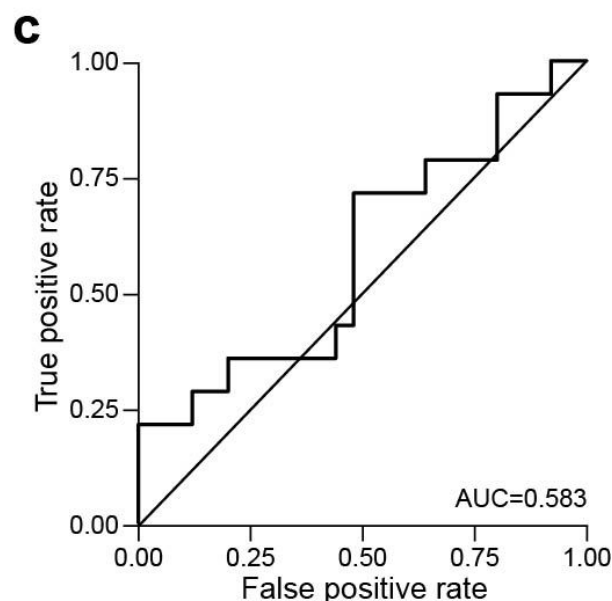

**Supplementary Figure 5. FCM and cytokines associated with response to the HBV vaccine on the EM131 training set**

(a) Examples of our gating procedure for obtaining the percentage of memory IgG+ B cell populations (CD3-CD19+HLA-DR+CD20+CD27+CD10-IgG+) among total B cells (CD3-CD19+HLA-DR+) for subject 2087 at visit 2 (value=12.6%). Please see **Supplementary Table 5a** for cell population annotations. (b-c) Cytokine-expression was analyzed in order to identify markers of response to the HBV vaccine. (b) Boxplots presenting the levels of three cytokines selected in the forward selection model between responders and poor-responders to the HBV vaccine on the EM131 training set. The three cytokines selected are implicated in the inflammatory mechanism. (c) ROC curves for the prediction of the HBV vaccine response using the cytokine data on the EM131 test set.



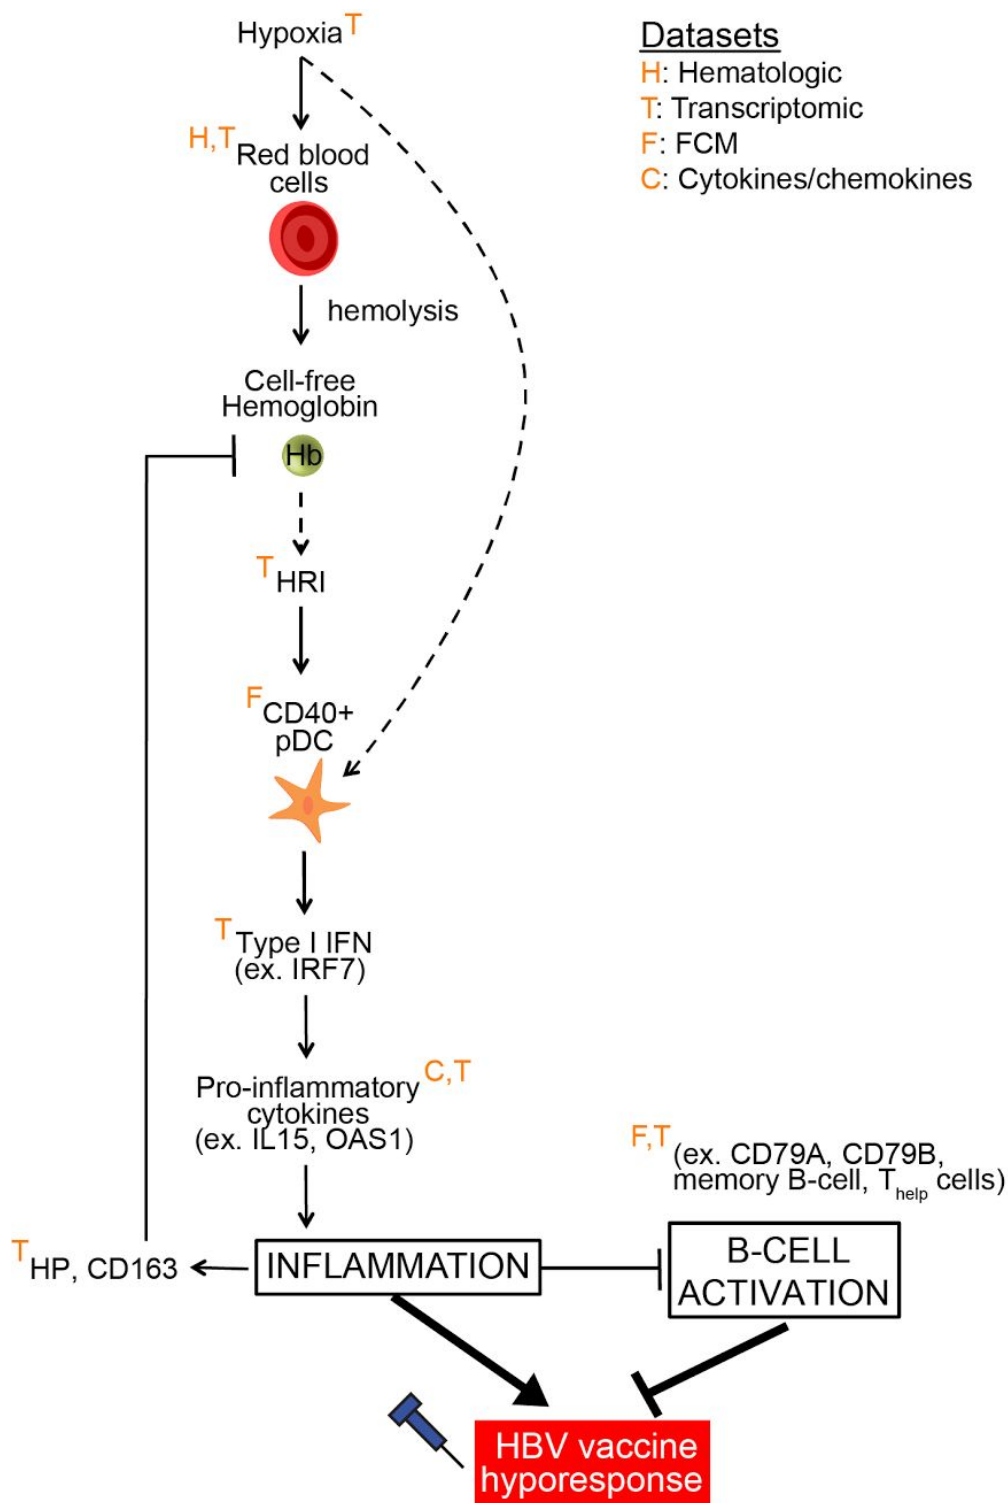

### Supplementary Figure 7. Proposed mechanism leading to hyporesponse to HBV vaccine

Hypoxia (HIF-1 $\alpha$  signaling pathway) leads to the increase in red blood cells. Turnover of red blood cells will release free-hemoglobin in the circulation. Hemoglobin, a source of heme-complex, will trigger the activation of the heme-regulated eIF2 $\alpha$  kinase (HRI). In turn, HRI will stimulate the production of type I interferon by pDCs and promote the release of pro-inflammatory cytokines in the system. The resulting inflammatory response will hinder response to HBV vaccination. A negative feedback loop involving haptoglobin (HP) and CD163 will be activated to catalyze the degradation of cell-free hemoglobin. In parallel, the absence of B-cell activation or the low frequency of memory B-cell will result in hyporesponse to HBV vaccine. The datasets (transcriptomic, FCM, cytokines/chemokines and hematologic) supporting the elements of the proposed mechanism are indicated on the figure.

**Supplementary Table 1** Clinical characteristics of the study cohort

|                                   | Complete data set | Training set  | Test set     | Fisher's exact test/<br>Wilcoxon test p-value |
|-----------------------------------|-------------------|---------------|--------------|-----------------------------------------------|
| n                                 | 174               | 95            | 49           |                                               |
| Age                               |                   |               |              |                                               |
| range                             | [25, 83]          | [65, 81]      | [65, 83]     | 0.896                                         |
| [25-40]                           | 30                | 0             | 0            | 0.810                                         |
| [65-75[                           | 122               | 81            | 41           |                                               |
| [75-83]                           | 22                | 14            | 8            |                                               |
| Gender                            |                   |               |              |                                               |
| male                              | 79                | 44            | 23           | 1.00                                          |
| female                            | 95                | 51            | 26           |                                               |
| Race                              |                   |               |              |                                               |
| white                             | 174               | 95            | 49           | N/A                                           |
| Height (cm)                       |                   |               |              |                                               |
| range                             | [139, 190]        | [144, 182]    | [139, 181]   | 0.666                                         |
| Weight (kg)                       |                   |               |              |                                               |
| range                             | [40.3, 112.4]     | [47.7, 102.5] | [40.3, 94.5] | 0.634                                         |
| BMI (kg/m <sup>2</sup> )          |                   |               |              |                                               |
| range                             | [17.0, 34.9]      | [21.5, 33.9]  | [17.0, 33.5] | 0.452                                         |
| < 30                              | 140               | 78            | 41           | 0.813                                         |
| ≥ 30                              | 32                | 16            | 7            |                                               |
| N/A                               | 2                 | 1             | 1            |                                               |
| CMV at V2 (IU/mL)                 |                   |               |              |                                               |
| < 0.75                            | 94                | 49            | 24           | 0.861                                         |
| ≥ 0.75                            | 80                | 46            | 25           |                                               |
| HepB at V2 (mIU/mL)               |                   |               |              |                                               |
| < 5                               | 171               | 94            | 48           | N/A                                           |
| ≥ 5                               | 3                 | 1             | 1            |                                               |
| HepB at V5 (mIU/mL)               |                   |               |              |                                               |
| < 5                               | 94                | 54            | 30           | 0.390                                         |
| ≥ 5                               | 79                | 41            | 19           |                                               |
| NA                                | 1                 | 0             | 1            |                                               |
| Cholera at V2 (1/dilution factor) |                   |               |              |                                               |
| < 40                              | 152               | 83            | 43           | 1.00                                          |
| ≥ 40                              | 22                | 12            | 6            |                                               |
| Cholera at V4 (1/dilution factor) |                   |               |              |                                               |
| < 40                              | 50                | 25            | 13           | 1.00                                          |
| ≥ 40                              | 123               | 70            | 35           |                                               |
| N/A                               | 1                 | 0             | 1            |                                               |
| Dip at V2 (IU/mL)                 |                   |               |              |                                               |
| range                             | ]0, 5.72]         | ]0, 5.72]     | ]0, 1.61]    | 0.401                                         |
| Dip at V4 (IU/mL)                 |                   |               |              |                                               |
| range                             | ]0, 51.1]         | ]0, 24.3]     | ]0, 51.1]    | 0.377                                         |
| Tet at V2 (IU/mL)                 |                   |               |              |                                               |
| range                             | ]0, 24.9]         | ]0, 19.4]     | ]0, 24.9]    | 0.628                                         |
| Tet at V4 (IU/mL)                 |                   |               |              |                                               |
| range                             | ]0, 71.3]         | ]0, 71.3]     | ]0, 41.6]    | 0.696                                         |

All participants were of European descent with BMI below 35 kg/m<sup>2</sup>; ~55% were women; and none had histories of autoimmunity, immunomodulating medications, cancer, recent vaccination or recent infection. The Fisher's exact test (categorical variable) and the Wilcoxon Rank sum test (continuous variable) were used to assess difference between the EM131 training set and EM131 test set. No significant difference in term of clinical (BMI: body mass index) or serological (HepB: hepatitis B, Dip: diphtheria, Tet: tetanus) variables was observed between those two sets.

**Supplementary Table 2** Logistic regression with poor-response to HBV vaccination

|                                     | Univariate |               |                | Multivariate |               |                |
|-------------------------------------|------------|---------------|----------------|--------------|---------------|----------------|
|                                     | OR         | 95% CI        | p-value        | OR           | 95% CI        | p-value        |
| Age ([65, 83] v [25, 65])           | 2.80       | [1.24, 6.69]  | <b>0.0158</b>  | 1.52         | [0.593, 4.03] | 0.385          |
| Sex (male v female)                 | 2.80       | [1.50, 5.33]  | <b>0.00142</b> | 2.44         | [1.26, 4.80]  | <b>0.00847</b> |
| Height (per cm)                     | 1.03       | [0.994, 1.07] | 0.105          | ---          | ---           | ---            |
| Weight (per kg)                     | 1.02       | [0.998, 1.05] | 0.0832         | ---          | ---           | ---            |
| BMI (per kg/m <sup>2</sup> )        | 1.06       | [0.959, 1.17] | 0.272          | ---          | ---           | ---            |
| CMV ( $\geq 0.75$ v $< 0.75$ IU/ml) | 1.26       | [0.688, 2.33] | 0.453          | ---          | ---           | ---            |
| BioAge (per unit)                   | 5.62       | [1.82, 18.6]  | <b>0.00343</b> | 4.14         | [1.21, 15.2]  | <b>0.0270</b>  |

Univariate and Multivariate logistic regression against response to HBV vaccine was performed using clinical variables and the BioAge signature. Only variables presenting a significant association with response to HBV vaccine at the univariate level (z-test:  $p\text{-value} \leq 0.05$ ) were included in the multivariate level. Age, gender and the BioAge are significantly associated with HBV vaccine response in the univariate analysis. The BioAge signature maintains significant association with HBV vaccine response even after correcting for clinical variable like age and gender.

Supplementary Table 3a. List of transcript in the BioAge signature

| Probe ID      | Gene Symbol | Module | Pearson Correlation | Regression Coefficient | t-statistic | nominal p-value | adjusted p-value |
|---------------|-------------|--------|---------------------|------------------------|-------------|-----------------|------------------|
| GI_4507398-S  | TCF4        | 1      | -0.310              | -0.00829               | -11.4       | 8.98E-29        | 3.03E-25         |
| GI_24475968-S | MZB1        | 1      | -0.285              | -0.0142                | -10.5       | 1.27E-24        | 2.15E-21         |
| GI_31542536-S | CDCA7L      | 1      | -0.248              | -0.00941               | -9.00       | 8.12E-19        | 6.51E-16         |
| GI_13375806-S | BEND5       | 1      | -0.232              | -0.0160                | -8.38       | 1.39E-16        | 7.72E-14         |
| GI_32189367-S | IGJ         | 1      | -0.218              | -0.0138                | -7.85       | 8.93E-15        | 3.80E-12         |
| Hs.449609-S   | ---         | 1      | -0.216              | -0.0149                | -7.80       | 1.28E-14        | 5.31E-12         |
| GI_23238191-S | TNFRSF17    | 1      | -0.216              | -0.0194                | -7.78       | 1.55E-14        | 6.20E-12         |
| GI_38348195-S | DERL3       | 1      | -0.207              | -0.0146                | -7.46       | 1.67E-13        | 5.59E-11         |
| Hs.449584-S   | ---         | 1      | -0.200              | -0.0236                | -7.19       | 1.15E-12        | 3.22E-10         |
| GI_20336304-I | BCL11A      | 1      | -0.196              | -0.00621               | -7.03       | 3.36E-12        | 8.40E-10         |
| GI_41190507-S | ---         | 1      | -0.186              | -0.0123                | -6.64       | 4.58E-11        | 9.30E-09         |
| GI_40317614-A | PMEPA1      | 1      | -0.185              | -0.0247                | -6.63       | 4.99E-11        | 1.00E-08         |
| GI_41190543-S | ---         | 1      | -0.184              | -0.0169                | -6.57       | 7.16E-11        | 1.37E-08         |
| Hs.449602-S   | IGLL5       | 1      | -0.183              | -0.0120                | -6.57       | 7.58E-11        | 1.43E-08         |
| GI_21361744-S | STRBP       | 1      | -0.183              | -0.00643               | -6.54       | 9.24E-11        | 1.72E-08         |
| GI_40804747-S | LIMS2       | 1      | -0.180              | -0.0113                | -6.45       | 1.62E-10        | 2.93E-08         |
| Hs.512137-S   | ---         | 1      | -0.180              | -0.0126                | -6.43       | 1.84E-10        | 3.25E-08         |
| GI_12669916-S | E2F5        | 1      | -0.179              | -0.00752               | -6.40       | 2.19E-10        | 3.77E-08         |
| Hs.205675-S   | ---         | 1      | -0.176              | -0.0106                | -6.28       | 4.66E-10        | 7.42E-08         |
| Hs.16515-S    | ---         | 1      | -0.169              | -0.00809               | -6.01       | 2.40E-09        | 3.39E-07         |
| hmm11123-S    | ---         | 1      | -0.168              | -0.0238                | -6.01       | 2.50E-09        | 3.50E-07         |
| Hs.512124-S   | ---         | 1      | -0.165              | -0.00928               | -5.88       | 5.30E-09        | 6.79E-07         |
| hmm10298-S    | ---         | 1      | -0.165              | -0.0129                | -5.88       | 5.32E-09        | 6.80E-07         |
| GI_40254976-S | MIR600HG    | 1      | -0.160              | -0.0102                | -5.72       | 1.34E-08        | 1.61E-06         |
| GI_21264573-S | TSPAN13     | 1      | -0.159              | -0.00968               | -5.68       | 1.72E-08        | 1.99E-06         |
| GI_21536441-S | BCL7A       | 1      | -0.159              | -0.0125                | -5.66       | 1.87E-08        | 2.13E-06         |
| GI_41350329-S | MOB3B       | 1      | -0.159              | -0.00854               | -5.66       | 1.92E-08        | 2.17E-06         |
| GI_37546969-S | ---         | 1      | -0.156              | -0.0117                | -5.54       | 3.59E-08        | 3.90E-06         |
| GI_31542945-S | ---         | 1      | -0.156              | -0.00399               | -5.53       | 3.85E-08        | 4.16E-06         |
| GI_7019342-S  | CD24        | 1      | -0.155              | -0.0112                | -5.53       | 3.95E-08        | 4.24E-06         |
| GI_4507176-S  | SPIB        | 1      | -0.153              | -0.00717               | -5.45       | 6.00E-08        | 6.21E-06         |
| GI_41281541-S | COBLL1      | 1      | -0.151              | -0.0154                | -5.37       | 9.42E-08        | 9.37E-06         |
| GI_42662613-S | ---         | 1      | -0.149              | -0.00893               | -5.31       | 1.27E-07        | 1.21E-05         |
| GI_5453933-S  | POU2AF1     | 1      | -0.148              | -0.00975               | -5.25       | 1.76E-07        | 1.64E-05         |
| GI_18641377-S | HLA-DOB     | 1      | -0.144              | -0.00797               | -5.11       | 3.73E-07        | 3.19E-05         |
| GI_7661757-S  | KIAA0125    | 1      | -0.143              | -0.00580               | -5.09       | 4.06E-07        | 3.43E-05         |
| Hs.406489-S   | ---         | 1      | -0.140              | -0.0129                | -4.99       | 6.82E-07        | 5.44E-05         |
| GI_27500987-S | LINC00494   | 1      | -0.137              | -0.0198                | -4.87       | 1.24E-06        | 9.09E-05         |
| GI_21040361-A | BACE2       | 1      | -0.137              | -0.00735               | -4.85       | 1.38E-06        | 0.000100         |
| Hs.449605-S   | ---         | 1      | -0.136              | -0.00930               | -4.85       | 1.42E-06        | 0.000103         |
| GI_4502650-S  | CD22        | 1      | -0.136              | -0.00678               | -4.82       | 1.59E-06        | 0.000112         |
| Hs.188173-S   | ---         | 1      | -0.134              | -0.00872               | -4.76       | 2.12E-06        | 0.000145         |
| GI_23110986-A | CD20        | 1      | -0.134              | -0.00731               | -4.75       | 2.27E-06        | 0.000154         |
| GI_32484980-S | BANK1       | 1      | -0.132              | -0.00595               | -4.69       | 3.08E-06        | 0.000203         |
| GI_6912271-S  | STAP1       | 1      | -0.128              | -0.00897               | -4.55       | 5.82E-06        | 0.000356         |
| GI_7662295-S  | FCHSD2      | 1      | -0.126              | -0.00326               | -4.45       | 9.27E-06        | 0.000543         |
| GI_11415027-S | TCL1A       | 1      | -0.122              | -0.00860               | -4.34       | 1.53E-05        | 0.000837         |
| GI_21264601-S | LAMA5       | 1      | -0.120              | -0.00598               | -4.26       | 2.17E-05        | 0.00112          |
| GI_20270264-A | FCRL2       | 1      | -0.119              | -0.0120                | -4.23       | 2.47E-05        | 0.00124          |
| Hs.444414-S   | ---         | 1      | -0.118              | -0.0105                | -4.17       | 3.20E-05        | 0.00154          |
| GI_19923628-I | FCRL2       | 1      | -0.118              | -0.00752               | -4.17       | 3.21E-05        | 0.00154          |
| GI_23238205-S | TNFRSF13B   | 1      | -0.117              | -0.00577               | -4.16       | 3.41E-05        | 0.00162          |
| Hs.469446-S   | ---         | 1      | -0.116              | -0.00779               | -4.10       | 4.33E-05        | 0.00197          |
| Hs.132571-S   | ---         | 1      | -0.116              | -0.0108                | -4.10       | 4.33E-05        | 0.00197          |
| GI_11038671-A | CD79A       | 1      | -0.114              | -0.00603               | -4.02       | 6.15E-05        | 0.00266          |
| GI_20302136-S | KIAA0125    | 1      | -0.112              | -0.0119                | -3.98       | 7.22E-05        | 0.00302          |
| GI_32698768-S | GNG7        | 1      | -0.110              | -0.00492               | -3.90       | 0.000102        | 0.00402          |
| GI_34147712-S | TLE1        | 1      | -0.110              | -0.00792               | -3.89       | 0.000104        | 0.00409          |
| GI_23110988-I | CD20        | 1      | -0.109              | -0.00597               | -3.86       | 0.000117        | 0.00448          |
| GI_31542206-S | FAM129C     | 1      | -0.108              | -0.00599               | -3.83       | 0.000133        | 0.00498          |
| GI_33469981-S | BLK         | 1      | -0.108              | -0.00491               | -3.82       | 0.000137        | 0.00512          |
| GI_42544162-S | FCRLA       | 1      | -0.101              | -0.00534               | -3.58       | 0.000363        | 0.0113           |
| GI_4826763-S  | HS3ST1      | 1      | -0.0991             | -0.0158                | -3.51       | 0.000472        | 0.0140           |
| GI_7019566-S  | VPREB3      | 1      | -0.0982             | -0.0120                | -3.47       | 0.000529        | 0.0153           |
| GI_15451903-S | CD200       | 1      | -0.0981             | -0.0104                | -3.47       | 0.000537        | 0.0155           |
| GI_32441282-I | RALGPS2     | 1      | -0.0976             | -0.0129                | -3.45       | 0.000575        | 0.0164           |
| Hs.136376-S   | ---         | 1      | -0.0973             | -0.0182                | -3.44       | 0.000598        | 0.0169           |
| GI_27777635-S | TCF3        | 1      | -0.0973             | -0.00263               | -3.43       | 0.000619        | 0.0173           |
| GI_13376686-S | KIAA0226L   | 1      | -0.0963             | -0.00455               | -3.40       | 0.000686        | 0.0188           |
| GI_32481214-S | CD19        | 1      | -0.0949             | -0.00502               | -3.35       | 0.000826        | 0.0218           |
| GI_14550413-S | FCRL5       | 1      | -0.0934             | -0.00789               | -3.30       | 0.000992        | 0.0251           |
| GI_9961251-A  | ABCBA4      | 1      | -0.0925             | -0.00750               | -3.27       | 0.001103        | 0.0273           |
| Hs.446193-S   | ---         | 1      | -0.0917             | -0.0134                | -3.24       | 0.001212        | 0.0293           |
| hmm3577-S     | ---         | 1      | -0.0913             | -0.00726               | -3.23       | 0.001292        | 0.0307           |
| GI_37546026-S | ---         | 1      | -0.0907             | -0.00638               | -3.21       | 0.001380        | 0.0323           |
| hmm3574-S     | ---         | 1      | -0.0879             | -0.00606               | -3.11       | 0.001933        | 0.0422           |
| GI_8922306-I  | ---         | 1      | -0.0863             | -0.0152                | -3.05       | 0.002349        | 0.0490           |
| GI_11038675-A | CD79B       | 1      | -0.0863             | -0.00344               | -3.04       | 0.002377        | 0.0494           |
| GI_18375502-A | APEX1       | 2      | -0.255              | -0.00413               | -9.18       | 1.80E-19        | 1.52E-16         |
| GI_25777719-A | ALDH5A1     | 2      | -0.207              | -0.0133                | -7.43       | 2.06E-13        | 6.73E-11         |
| GI_5453602-S  | CCT2        | 2      | -0.195              | -0.00413               | -6.97       | 5.18E-12        | 1.25E-09         |
| GI_16905527-A | DAP3        | 2      | -0.189              | -0.00237               | -6.67       | 3.72E-11        | 7.69E-09         |
| GI_34222198-S | LRRRC8D     | 2      | -0.172              | -0.00383               | -6.13       | 1.21E-09        | 1.77E-07         |
| GI_17388802-S | PAICS       | 2      | -0.168              | -0.00707               | -6.00       | 2.59E-09        | 3.57E-07         |

## Legend

- 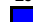 Genes negatively correlated to age  
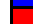 Genes positively correlated to age

|               |             |   |        |          |       |          |          |
|---------------|-------------|---|--------|----------|-------|----------|----------|
| GI_4506792-S  | ATXN1       | 2 | 0.168  | 0.00449  | 5.99  | 2.72E-09 | 3.73E-07 |
| GI_38787975-S | TSPAN3      | 2 | -0.167 | -0.00675 | -5.95 | 3.42E-09 | 4.57E-07 |
| GI_37540654-S | ZNF518B     | 2 | -0.162 | -0.00616 | -5.77 | 1.02E-08 | 1.23E-06 |
| GI_22748692-S | ARL14EP     | 2 | -0.157 | -0.00463 | -5.59 | 2.81E-08 | 3.11E-06 |
| GI_4505454-S  | NRIP1       | 2 | -0.153 | -0.00887 | -5.44 | 6.31E-08 | 6.50E-06 |
| GI_7657135-S  | GPR160      | 2 | -0.152 | -0.00488 | -5.39 | 8.55E-08 | 8.64E-06 |
| GI_4506558-S  | ABCE1       | 2 | -0.151 | -0.00462 | -5.38 | 8.92E-08 | 8.99E-06 |
| GI_27764872-S | CRLF3       | 2 | -0.151 | -0.00431 | -5.36 | 1.00E-07 | 9.90E-06 |
| GI_29570797-S | PPAT        | 2 | -0.149 | -0.00608 | -5.31 | 1.27E-07 | 1.21E-05 |
| GI_40254433-S | PDE3B       | 2 | -0.148 | -0.0245  | -5.27 | 1.60E-07 | 1.49E-05 |
| GI_10864048-S | FAM60A      | 2 | -0.146 | -0.00313 | -5.18 | 2.53E-07 | 2.27E-05 |
| GI_34222383-S | THNSL1      | 2 | -0.144 | -0.0244  | -5.12 | 3.57E-07 | 3.06E-05 |
| GI_7662509-S  | LEPROTL1    | 2 | -0.144 | -0.00687 | -5.11 | 3.82E-07 | 3.27E-05 |
| GI_21359901-S | NSA2        | 2 | -0.144 | -0.00363 | -5.09 | 4.12E-07 | 3.48E-05 |
| GI_21265090-S | MRPL3       | 2 | -0.140 | -0.00450 | -4.96 | 8.02E-07 | 6.27E-05 |
| GI_24475984-S | TMEM14C     | 2 | -0.139 | -0.00425 | -4.93 | 9.45E-07 | 7.23E-05 |
| GI_16445423-S | WDR12       | 2 | -0.139 | -0.00422 | -4.93 | 9.52E-07 | 7.27E-05 |
| GI_19743810-S | TBK1        | 2 | 0.139  | 0.00255  | 4.89  | 1.15E-06 | 8.58E-05 |
| GI_34147704-S | HMGN1       | 2 | -0.138 | -0.00469 | -4.88 | 1.18E-06 | 8.75E-05 |
| GI_40255150-S | ---         | 2 | -0.137 | -0.00856 | -4.87 | 1.27E-06 | 9.33E-05 |
| GI_16950596-A | MRPS33      | 2 | -0.136 | -0.00314 | -4.83 | 1.57E-06 | 0.000111 |
| GI_7705432-S  | EIF3L       | 2 | -0.136 | -0.00235 | -4.79 | 1.89E-06 | 0.000131 |
| GI_4502890-S  | CLNS1A      | 2 | -0.134 | -0.00225 | -4.72 | 2.58E-06 | 0.000173 |
| GI_16306478-S | CEP41       | 2 | -0.132 | -0.0163  | -4.69 | 3.00E-06 | 0.000198 |
| GI_18482382-S | KLHL6       | 2 | -0.132 | -0.00601 | -4.69 | 3.02E-06 | 0.000199 |
| GI_37059742-S | NIFK        | 2 | -0.133 | -0.00315 | -4.69 | 3.06E-06 | 0.000202 |
| GI_42789728-S | LRMP        | 2 | -0.131 | -0.00220 | -4.60 | 4.69E-06 | 0.000294 |
| GI_40353732-S | NPM1        | 2 | -0.129 | -0.00536 | -4.59 | 4.95E-06 | 0.000307 |
| GI_4503520-S  | EIF3E       | 2 | -0.128 | -0.00448 | -4.53 | 6.58E-06 | 0.000399 |
| GI_33286443-S | MAML2       | 2 | -0.127 | -0.00638 | -4.52 | 6.73E-06 | 0.000406 |
| GI_34335263-A | ZMYND8      | 2 | -0.126 | -0.00246 | -4.45 | 9.48E-06 | 0.000554 |
| GI_22748758-S | LRRC75A-AS1 | 2 | -0.124 | -0.00381 | -4.40 | 1.19E-05 | 0.000677 |
| GI_26190615-S | KLHDC1      | 2 | -0.124 | -0.00449 | -4.39 | 1.23E-05 | 0.000699 |
| GI_4506742-S  | RPS8        | 2 | -0.123 | -0.00259 | -4.34 | 1.53E-05 | 0.000837 |
| GI_4506890-S  | SET         | 2 | -0.123 | -0.00235 | -4.34 | 1.56E-05 | 0.000854 |
| GI_5730038-S  | SETMAR      | 2 | -0.122 | -0.00347 | -4.32 | 1.67E-05 | 0.000899 |
| GI_14211872-S | EBPL        | 2 | -0.120 | -0.00320 | -4.26 | 2.23E-05 | 0.00114  |
| GI_37543779-S | AMN1        | 2 | -0.120 | -0.00519 | -4.25 | 2.30E-05 | 0.00117  |
| GI_10864022-S | ZBED5       | 2 | -0.120 | -0.00304 | -4.24 | 2.38E-05 | 0.00121  |
| GI_20127469-S | EEF1E1      | 2 | -0.120 | -0.00344 | -4.23 | 2.56E-05 | 0.00128  |
| GI_40789255-S | SRP72       | 2 | -0.120 | -0.00231 | -4.21 | 2.72E-05 | 0.00134  |
| GI_38455426-S | CCT4        | 2 | -0.118 | -0.00238 | -4.14 | 3.64E-05 | 0.00171  |
| GI_21359925-S | HMG20A      | 2 | -0.117 | -0.00376 | -4.14 | 3.68E-05 | 0.00173  |
| GI_13376622-S | THOC7       | 2 | -0.117 | -0.00215 | -4.10 | 4.33E-05 | 0.00197  |
| GI_8922630-S  | EXD2        | 2 | -0.116 | -0.0198  | -4.10 | 4.37E-05 | 0.00198  |
| GI_20143934-I | RLN2        | 2 | -0.114 | -0.0198  | -4.05 | 5.36E-05 | 0.00236  |
| GI_7705727-S  | CUTC        | 2 | -0.115 | -0.00224 | -4.05 | 5.38E-05 | 0.00236  |
| GI_22538484-S | PRPSAP2     | 2 | -0.115 | -0.00211 | -4.04 | 5.61E-05 | 0.00245  |
| GI_17402905-S | RPL22       | 2 | -0.114 | -0.00404 | -4.03 | 5.82E-05 | 0.00253  |
| GI_30315657-A | SPTBN1      | 2 | -0.113 | -0.0153  | -4.01 | 6.30E-05 | 0.00272  |
| GI_37694064-A | EBAG9       | 2 | -0.114 | -0.00212 | -4.01 | 6.42E-05 | 0.00276  |
| GI_17017971-S | RPL26L1     | 2 | -0.114 | -0.00209 | -4.00 | 6.61E-05 | 0.00282  |
| GI_15812219-S | RPL31       | 2 | -0.114 | -0.00167 | -4.00 | 6.78E-05 | 0.00288  |
| GI_13491165-S | PUM1        | 2 | -0.113 | -0.00214 | -3.99 | 7.09E-05 | 0.00298  |
| GI_24497598-A | PIGP        | 2 | -0.112 | -0.00295 | -3.96 | 7.81E-05 | 0.00323  |
| GI_11496890-S | ADH5        | 2 | -0.112 | -0.00377 | -3.96 | 7.81E-05 | 0.00323  |
| GI_40538800-S | TMEM200A    | 2 | 0.110  | 0.00698  | 3.89  | 0.000107 | 0.00418  |
| GI_34147499-S | PPP1R2      | 2 | -0.110 | -0.00385 | -3.88 | 0.000111 | 0.00429  |
| GI_16418408-S | TMEM123     | 2 | -0.110 | -0.00463 | -3.87 | 0.000112 | 0.00433  |
| GI_13514830-S | DDX10       | 2 | -0.110 | -0.00226 | -3.87 | 0.000113 | 0.00433  |
| GI_8923351-S  | MAP4K4      | 2 | -0.109 | -0.00376 | -3.85 | 0.000123 | 0.00469  |
| GI_16950602-S | MRPS35      | 2 | -0.110 | -0.00207 | -3.85 | 0.000124 | 0.00470  |
| GI_33519472-S | NDIFP1      | 2 | -0.109 | -0.00374 | -3.84 | 0.000132 | 0.00494  |
| GI_37538683-S | LINC-PINT   | 2 | 0.108  | 0.00558  | 3.81  | 0.000148 | 0.00545  |
| Hs.508436-S   | RABGAP1L    | 2 | 0.108  | 0.00473  | 3.80  | 0.000150 | 0.00551  |
| GI_5453997-S  | IPO7        | 2 | -0.107 | -0.00618 | -3.80 | 0.000150 | 0.00552  |
| GI_37550602-S | RPL22L1     | 2 | -0.108 | -0.00227 | -3.79 | 0.000156 | 0.00567  |
| GI_33239442-A | SYPL1       | 2 | -0.107 | -0.00366 | -3.79 | 0.000161 | 0.00581  |
| GI_40788009-S | CD55        | 2 | -0.107 | -0.00284 | -3.77 | 0.000170 | 0.00609  |
| GI_4504522-S  | ---         | 2 | -0.106 | -0.00383 | -3.73 | 0.000201 | 0.00700  |
| GI_7106298-S  | ATXN10      | 2 | -0.106 | -0.00227 | -3.72 | 0.000206 | 0.00712  |
| GI_4758733-S  | PMPCB       | 2 | -0.106 | -0.00188 | -3.72 | 0.000207 | 0.00716  |
| GI_23510357-A | RIOK1       | 2 | -0.105 | -0.00246 | -3.71 | 0.000220 | 0.00753  |
| GI_21314761-S | MCEE        | 2 | -0.105 | -0.00314 | -3.71 | 0.000220 | 0.00753  |
| GI_21389390-S | FOPNL       | 2 | -0.105 | -0.00171 | -3.69 | 0.000232 | 0.00790  |
| GI_33186904-S | OMA1        | 2 | -0.104 | -0.00345 | -3.69 | 0.000237 | 0.00804  |
| GI_21389336-S | RPIA        | 2 | -0.104 | -0.00206 | -3.67 | 0.000256 | 0.00857  |
| GI_24429565-I | PDE7A       | 2 | -0.104 | -0.0104  | -3.67 | 0.000257 | 0.00858  |
| GI_28416426-I | ZNF655      | 2 | -0.104 | -0.00207 | -3.65 | 0.000273 | 0.00899  |
| GI_38505204-S | PTEN        | 2 | -0.103 | -0.00211 | -3.64 | 0.000286 | 0.00937  |
| GI_42658173-S | SUN1        | 2 | -0.102 | -0.00256 | -3.59 | 0.000340 | 0.0108   |
| Hs.519802-S   | NPM1        | 2 | -0.102 | -0.00434 | -3.59 | 0.000340 | 0.0108   |
| GI_21265077-S | MRPL15      | 2 | -0.102 | -0.00197 | -3.59 | 0.000349 | 0.0110   |
| GI_34147413-S | NOA1        | 2 | -0.102 | -0.00189 | -3.58 | 0.000353 | 0.0111   |
| GI_37059748-S | TBC1D15     | 2 | -0.102 | -0.00198 | -3.58 | 0.000363 | 0.0113   |
| GI_24429565-A | PDE7A       | 2 | -0.101 | -0.0141  | -3.56 | 0.000385 | 0.0118   |
| GI_31982952-I | POGLUT1     | 2 | -0.100 | -0.00337 | -3.54 | 0.000413 | 0.0125   |

|               |            |   |         |          |       |          |          |
|---------------|------------|---|---------|----------|-------|----------|----------|
| GI_8922941-S  | AGPAT5     | 2 | -0.100  | -0.00387 | -3.54 | 0.000415 | 0.0125   |
| GI_16117786-A | RPL34      | 2 | -0.100  | -0.00313 | -3.54 | 0.000418 | 0.0126   |
| GI_38327549-S | LPAR6      | 2 | 0.100   | 0.00375  | 3.54  | 0.000423 | 0.0127   |
| GI_4507130-S  | SNRPF      | 2 | -0.100  | -0.00211 | -3.53 | 0.000426 | 0.0128   |
| GI_9506672-S  | MIOS       | 2 | -0.101  | -0.00143 | -3.53 | 0.000430 | 0.0129   |
| GI_9966880-S  | NUP107     | 2 | -0.100  | -0.00223 | -3.53 | 0.000432 | 0.0129   |
| GI_7662231-S  | ZC3H11A    | 2 | -0.100  | -0.00224 | -3.51 | 0.000462 | 0.0137   |
| GI_14149729-S | SMARCAD1   | 2 | -0.0987 | -0.00528 | -3.49 | 0.000500 | 0.0146   |
| GI_8051634-S  | XPO1       | 2 | -0.0985 | -0.00229 | -3.47 | 0.000542 | 0.0156   |
| GI_40255235-S | ZNF281     | 2 | -0.0981 | -0.00204 | -3.45 | 0.000577 | 0.0165   |
| GI_14042922-S | TMEM245    | 2 | -0.0979 | -0.00254 | -3.45 | 0.000582 | 0.0166   |
| GI_9951918-S  | KATNA1     | 2 | 0.0975  | 0.00250  | 3.44  | 0.000610 | 0.0171   |
| GI_29244580-S | ZDHHHC17   | 2 | -0.0971 | -0.00244 | -3.42 | 0.000642 | 0.0179   |
| GI_31442407-S | SNRK       | 2 | -0.0967 | -0.00421 | -3.42 | 0.000653 | 0.0182   |
| GI_7662455-S  | FOXJ3      | 2 | -0.0974 | -0.00162 | -3.41 | 0.000659 | 0.0183   |
| GI_17017970-S | RPL26      | 2 | -0.0968 | -0.00283 | -3.41 | 0.000659 | 0.0183   |
| GI_13375984-S | ZFAND1     | 2 | -0.0968 | -0.00308 | -3.41 | 0.000659 | 0.0183   |
| GI_4885386-S  | HADH       | 2 | -0.0970 | -0.00221 | -3.41 | 0.000662 | 0.0183   |
| GI_7661795-S  | GTPBP8     | 2 | -0.0965 | -0.00272 | -3.40 | 0.000685 | 0.0188   |
| GI_42476207-S | AMZ2       | 2 | 0.0961  | 0.00220  | 3.38  | 0.000738 | 0.0199   |
| GI_16306499-A | FBXO21     | 2 | -0.0963 | -0.00162 | -3.37 | 0.000765 | 0.0204   |
| GI_29171760-S | PPA1       | 2 | -0.0953 | -0.00255 | -3.36 | 0.000802 | 0.0213   |
| GI_21237801-S | SMARCC1    | 2 | -0.0962 | -0.00140 | -3.36 | 0.000804 | 0.0213   |
| GI_18699723-S | PNISR      | 2 | -0.0950 | -0.00301 | -3.35 | 0.000828 | 0.0218   |
| GI_4505816-S  | PIP5K1B    | 2 | -0.0946 | -0.0145  | -3.34 | 0.000849 | 0.0222   |
| GI_13376244-S | GGNBF2     | 2 | -0.0953 | -0.00164 | -3.34 | 0.000856 | 0.0224   |
| GI_27501445-S | DENR       | 2 | -0.0950 | -0.00185 | -3.34 | 0.000877 | 0.0228   |
| GI_12545407-S | RASA2      | 2 | -0.0940 | -0.00397 | -3.32 | 0.000925 | 0.0237   |
| GI_34101266-A | BCKDHB     | 2 | -0.0939 | -0.00444 | -3.32 | 0.000930 | 0.0238   |
| GI_30425377-S | DRAM2      | 2 | -0.0935 | -0.00272 | -3.30 | 0.001006 | 0.0253   |
| GI_29743852-S | PRMT3      | 2 | -0.0929 | -0.00309 | -3.28 | 0.001074 | 0.0267   |
| GI_7656970-S  | N4BP2L2    | 2 | -0.0930 | -0.00232 | -3.28 | 0.001081 | 0.0268   |
| GI_20357534-S | ATP6V1G1   | 2 | -0.0929 | -0.00192 | -3.26 | 0.001131 | 0.0278   |
| GI_12597621-S | CLPX       | 2 | -0.0925 | -0.00215 | -3.26 | 0.001162 | 0.0284   |
| GI_14591917-S | SEH1L      | 2 | -0.0919 | -0.00431 | -3.24 | 0.001206 | 0.0292   |
| GI_41151340-S | HLA-F-AS1  | 2 | -0.0919 | -0.00223 | -3.24 | 0.001242 | 0.0298   |
| GI_5729936-S  | MTX2       | 2 | -0.0918 | -0.00253 | -3.23 | 0.001250 | 0.0300   |
| GI_23270402-A | CRYZL1     | 2 | -0.0915 | -0.00244 | -3.22 | 0.001299 | 0.0309   |
| GI_4504450-S  | RBMX       | 2 | -0.0921 | -0.00146 | -3.22 | 0.001303 | 0.0309   |
| GI_41054845-S | ARMCX5     | 2 | -0.0907 | -0.00803 | -3.21 | 0.001375 | 0.0322   |
| GI_31543090-S | MAK16      | 2 | -0.0908 | -0.00222 | -3.20 | 0.001421 | 0.0331   |
| GI_38158017-S | CNTRL      | 2 | -0.0907 | -0.00245 | -3.20 | 0.001424 | 0.0332   |
| GI_6912487-S  | LSM5       | 2 | -0.0906 | -0.00274 | -3.20 | 0.001430 | 0.0333   |
| GI_34328903-A | PIGN       | 2 | -0.0903 | -0.00282 | -3.18 | 0.001484 | 0.0343   |
| GI_14110394-S | XBP1       | 2 | -0.0905 | -0.00190 | -3.18 | 0.001513 | 0.0348   |
| GI_40254881-S | C21orf91   | 2 | 0.0900  | 0.00342  | 3.18  | 0.001528 | 0.0351   |
| GI_13384595-S | ZNF330     | 2 | -0.0900 | -0.00187 | -3.16 | 0.001608 | 0.0366   |
| GI_19923363-S | ARPP19     | 2 | 0.0889  | 0.00247  | 3.13  | 0.001778 | 0.0395   |
| GI_32483368-A | ORC3       | 2 | -0.0887 | -0.00371 | -3.13 | 0.001783 | 0.0396   |
| GI_25777737-S | ALDH6A1    | 2 | -0.0886 | -0.00235 | -3.12 | 0.001844 | 0.0406   |
| GI_4505540-S  | USO1       | 2 | -0.0882 | -0.00199 | -3.10 | 0.001968 | 0.0428   |
| GI_32306540-S | TRIT1      | 2 | -0.0877 | -0.00370 | -3.10 | 0.002011 | 0.0435   |
| GI_19311011-S | BRIX1      | 2 | -0.0878 | -0.00218 | -3.09 | 0.002036 | 0.0440   |
| GI_11863158-S | RYK        | 2 | -0.0876 | -0.00181 | -3.08 | 0.002124 | 0.0454   |
| GI_21389378-S | GTSF1      | 2 | 0.0871  | 0.00398  | 3.08  | 0.002141 | 0.0457   |
| GI_39725682-S | NARS2      | 2 | -0.0870 | -0.00565 | -3.07 | 0.002164 | 0.0460   |
| GI_37059785-S | LRRN3      | 3 | -0.529  | -0.0431  | -21.9 | 2.74E-90 | 1.29E-85 |
| GI_4505674-S  | PDE9A      | 3 | -0.390  | -0.0268  | -14.9 | 2.56E-46 | 4.04E-42 |
| GI_4503680-S  | FCGBP      | 3 | -0.357  | -0.0179  | -13.4 | 1.47E-38 | 1.16E-34 |
| GI_4503746-S  | FLNB       | 3 | -0.319  | -0.0101  | -11.8 | 1.60E-30 | 6.86E-27 |
| GI_30795213-S | CCR7       | 3 | -0.317  | -0.0168  | -11.7 | 3.08E-30 | 1.21E-26 |
| GI_4507052-S  | SLC7A6     | 3 | -0.289  | -0.00832 | -10.6 | 3.45E-25 | 6.79E-22 |
| GI_31542834-S | GAL3ST4    | 3 | -0.268  | -0.0174  | -9.80 | 6.64E-22 | 7.66E-19 |
| GI_22749458-S | GPC2       | 3 | -0.265  | -0.0138  | -9.68 | 2.03E-21 | 2.16E-18 |
| GI_21361616-S | FAM134B    | 3 | -0.265  | -0.0146  | -9.68 | 2.06E-21 | 2.16E-18 |
| GI_34147607-S | NOSIP      | 3 | -0.265  | -0.00760 | -9.63 | 3.31E-21 | 3.33E-18 |
| Hs.146543-S   | ---        | 3 | -0.264  | -0.0140  | -9.62 | 3.59E-21 | 3.53E-18 |
| GI_19923451-S | LEF1       | 3 | -0.261  | -0.0153  | -9.50 | 1.05E-20 | 1.01E-17 |
| GI_42661554-S | ZNF667-AS1 | 3 | -0.259  | -0.0168  | -9.44 | 1.78E-20 | 1.65E-17 |
| GI_40354211-S | IPCEF1     | 3 | -0.256  | -0.00658 | -9.28 | 7.29E-20 | 6.39E-17 |
| GI_23510435-S | CD27       | 3 | -0.244  | -0.0121  | -8.86 | 2.63E-18 | 1.97E-15 |
| GI_37552665-S | SGK223     | 3 | -0.244  | -0.00961 | -8.84 | 3.32E-18 | 2.38E-15 |
| GI_37059752-S | SUSD3      | 3 | -0.242  | -0.00741 | -8.77 | 5.73E-18 | 3.82E-15 |
| GI_33356175-S | SATB1      | 3 | -0.241  | -0.0111  | -8.74 | 7.49E-18 | 4.92E-15 |
| GI_31341850-S | LINC00282  | 3 | -0.239  | -0.0180  | -8.67 | 1.30E-17 | 8.40E-15 |
| GI_34147626-S | ZSCAN18    | 3 | -0.236  | -0.0177  | -8.53 | 4.16E-17 | 2.55E-14 |
| GI_21361852-S | PLXDC1     | 3 | -0.235  | -0.0129  | -8.50 | 5.39E-17 | 3.27E-14 |
| GI_19923906-S | OXNAD1     | 3 | -0.233  | -0.0153  | -8.44 | 8.63E-17 | 5.10E-14 |
| GI_4505668-S  | PDE6B      | 3 | -0.233  | -0.00668 | -8.41 | 1.08E-16 | 6.31E-14 |
| GI_21284386-A | ABLIM1     | 3 | -0.231  | -0.00952 | -8.36 | 1.62E-16 | 8.92E-14 |
| GI_42660348-S | ---        | 3 | -0.229  | -0.0119  | -8.29 | 2.98E-16 | 1.62E-13 |
| GI_5453765-S  | NELL2      | 3 | -0.224  | -0.0148  | -8.09 | 1.37E-15 | 6.81E-13 |
| GI_22748704-S | BTBD11     | 3 | -0.223  | -0.00965 | -8.04 | 2.12E-15 | 1.04E-12 |
| GI_33354248-S | DNAJA4     | 3 | -0.220  | -0.00499 | -7.90 | 6.16E-15 | 2.75E-12 |
| GI_37546957-S | TRABD2A    | 3 | -0.214  | -0.0128  | -7.72 | 2.30E-14 | 8.71E-12 |
| GI_42558263-S | FAM102A    | 3 | -0.207  | -0.00689 | -7.42 | 2.12E-13 | 6.86E-11 |
| GI_19923900-S | PCED1B     | 3 | -0.200  | -0.00700 | -7.16 | 1.42E-12 | 3.83E-10 |

|               |              |   |         |          |       |          |          |
|---------------|--------------|---|---------|----------|-------|----------|----------|
| GI_4507610-S  | TNK1         | 3 | -0.199  | -0.0270  | -7.15 | 1.44E-12 | 3.85E-10 |
| GI_4505466-S  | NT5E         | 3 | -0.197  | -0.0216  | -7.06 | 2.82E-12 | 7.17E-10 |
| GI_22748948-S | IGF1R        | 3 | -0.193  | -0.0105  | -6.91 | 7.82E-12 | 1.84E-09 |
| GI_7706512-S  | RAPGEF6      | 3 | -0.191  | -0.00560 | -6.82 | 1.38E-11 | 3.09E-09 |
| GI_22027529-S | LDLRAP1      | 3 | -0.188  | -0.00711 | -6.74 | 2.42E-11 | 5.23E-09 |
| GI_18426908-A | SIRPG        | 3 | -0.188  | -0.00887 | -6.74 | 2.49E-11 | 5.32E-09 |
| GI_37545997-S | C14orf64     | 3 | -0.188  | -0.0301  | -6.74 | 2.50E-11 | 5.33E-09 |
| GI_37546229-S | BEX4         | 3 | -0.188  | -0.00552 | -6.73 | 2.53E-11 | 5.37E-09 |
| GI_8393671-S  | KLHL3        | 3 | -0.187  | -0.00638 | -6.68 | 3.68E-11 | 7.63E-09 |
| GI_42660596-S | IGF1R        | 3 | -0.184  | -0.0143  | -6.60 | 5.91E-11 | 1.16E-08 |
| GI_42660198-S | TBC1D4       | 3 | -0.185  | -0.00812 | -6.60 | 6.00E-11 | 1.18E-08 |
| GI_20143980-S | HSD17B8      | 3 | -0.185  | -0.00518 | -6.60 | 6.06E-11 | 1.18E-08 |
| GI_27262654-A | IL16         | 3 | -0.182  | -0.00451 | -6.51 | 1.11E-10 | 2.05E-08 |
| GI_22507386-S | CELA1        | 3 | -0.179  | -0.0160  | -6.39 | 2.34E-10 | 3.98E-08 |
| GI_13540489-S | BACH2        | 3 | -0.177  | -0.0121  | -6.35 | 3.10E-10 | 5.16E-08 |
| Hs.264076-S   | RBM26-AS1    | 3 | -0.176  | -0.0243  | -6.29 | 4.36E-10 | 7.02E-08 |
| GI_34222221-S | EPHX2        | 3 | -0.174  | -0.0255  | -6.24 | 6.03E-10 | 9.35E-08 |
| GI_19923326-S | NET1         | 3 | -0.175  | -0.00500 | -6.22 | 6.63E-10 | 1.02E-07 |
| GI_21614516-A | GYPC         | 3 | -0.169  | -0.00528 | -6.04 | 2.07E-09 | 2.96E-07 |
| GI_34147517-S | FAIM3        | 3 | -0.169  | -0.00719 | -6.02 | 2.29E-09 | 3.24E-07 |
| GI_8393383-S  | C6orf48      | 3 | -0.166  | -0.00475 | -5.89 | 4.91E-09 | 6.41E-07 |
| GI_42476192-S | TMEM66       | 3 | -0.164  | -0.00324 | -5.81 | 8.01E-09 | 9.94E-07 |
| GI_13376301-S | ---          | 3 | -0.161  | -0.0154  | -5.73 | 1.25E-08 | 1.50E-06 |
| GI_11968026-S | AKTIP        | 3 | -0.159  | -0.00479 | -5.66 | 1.84E-08 | 2.11E-06 |
| GI_34222126-S | PIK3IP1      | 3 | -0.158  | -0.00741 | -5.63 | 2.27E-08 | 2.55E-06 |
| GI_32698973-S | LINC00663    | 3 | -0.158  | -0.00659 | -5.62 | 2.42E-08 | 2.71E-06 |
| GI_31543215-S | MYC          | 3 | -0.155  | -0.00682 | -5.52 | 4.17E-08 | 4.45E-06 |
| GI_37059747-S | ADPRM        | 3 | -0.153  | -0.00486 | -5.43 | 6.88E-08 | 7.03E-06 |
| GI_22035553-A | APBB1        | 3 | -0.150  | -0.00768 | -5.33 | 1.16E-07 | 1.14E-05 |
| GI_23110934-I | PSMA1        | 3 | -0.146  | -0.0127  | -5.20 | 2.37E-07 | 2.14E-05 |
| GI_41393585-A | DGKA         | 3 | -0.145  | -0.00559 | -5.15 | 3.05E-07 | 2.68E-05 |
| GI_4504706-S  | INPP4B       | 3 | 0.143   | 0.00531  | 5.09  | 4.15E-07 | 3.49E-05 |
| GI_31542293-S | CD2          | 3 | 0.141   | 0.00622  | 5.00  | 6.49E-07 | 5.25E-05 |
| GI_22027626-A | TRAF5        | 3 | -0.140  | -0.00400 | -4.98 | 7.27E-07 | 5.77E-05 |
| GI_32699055-S | ---          | 3 | -0.138  | -0.00691 | -4.90 | 1.06E-06 | 8.02E-05 |
| Hs.519321-S   | ---          | 3 | -0.136  | -0.0206  | -4.84 | 1.49E-06 | 0.000107 |
| GI_13375927-S | ANKRD55      | 3 | -0.136  | -0.0249  | -4.83 | 1.52E-06 | 0.000108 |
| hmm8270-S     | FAM159A      | 3 | -0.134  | -0.00590 | -4.75 | 2.27E-06 | 0.000154 |
| GI_4507742-S  | TXK          | 3 | -0.133  | -0.00975 | -4.73 | 2.55E-06 | 0.000171 |
| GI_33624782-I | SEPT6        | 3 | -0.131  | -0.00420 | -4.64 | 3.84E-06 | 0.000248 |
| GI_27477118-S | CAMK4        | 3 | -0.131  | -0.0134  | -4.64 | 3.85E-06 | 0.000248 |
| GI_32967308-S | EPHA1        | 3 | -0.131  | -0.0118  | -4.64 | 3.89E-06 | 0.000251 |
| GI_40255142-S | FAM184A      | 3 | -0.129  | -0.0190  | -4.59 | 4.80E-06 | 0.000300 |
| GI_34147571-S | ISG20        | 3 | -0.129  | -0.00358 | -4.56 | 5.71E-06 | 0.000350 |
| GI_34594658-S | MAPKAPK5-AS1 | 3 | -0.128  | -0.00264 | -4.51 | 6.95E-06 | 0.000418 |
| GI_28372504-S | CBX7         | 3 | 0.125   | 0.00328  | 4.43  | 1.05E-05 | 0.000607 |
| GI_24497579-S | AKR1B1       | 3 | -0.126  | -0.00201 | -4.42 | 1.06E-05 | 0.000613 |
| Hs.497588-S   | ---          | 3 | -0.123  | -0.0239  | -4.36 | 1.38E-05 | 0.000768 |
| GI_44680134-A | BDH1         | 3 | -0.123  | -0.0104  | -4.36 | 1.38E-05 | 0.000768 |
| GI_18426907-I | SIRPG        | 3 | -0.121  | -0.0100  | -4.28 | 2.00E-05 | 0.00105  |
| GI_18598508-S | CDR2         | 3 | -0.120  | -0.00711 | -4.27 | 2.12E-05 | 0.00110  |
| GI_24475858-S | ZNF101       | 3 | -0.119  | -0.00429 | -4.23 | 2.52E-05 | 0.00126  |
| hmm18828-S    | BEX2         | 3 | -0.118  | -0.0109  | -4.19 | 3.00E-05 | 0.00146  |
| GI_4758815-S  | NMT2         | 3 | -0.118  | -0.00626 | -4.18 | 3.08E-05 | 0.00149  |
| GI_7657436-S  | SESN1        | 3 | -0.117  | -0.00398 | -4.14 | 3.76E-05 | 0.00175  |
| hmm19321-S    | PRKCQ-AS1    | 3 | -0.117  | -0.00727 | -4.13 | 3.83E-05 | 0.00178  |
| GI_38045937-S | RNF144A      | 3 | -0.115  | -0.00360 | -4.07 | 5.06E-05 | 0.00225  |
| GI_21362099-S | ELOVL4       | 3 | -0.115  | -0.0101  | -4.06 | 5.17E-05 | 0.00228  |
| GI_38158029-S | SRSF6        | 3 | -0.113  | -0.00214 | -3.97 | 7.70E-05 | 0.00319  |
| GI_37546926-S | ---          | 3 | -0.112  | -0.00262 | -3.95 | 8.39E-05 | 0.00341  |
| GI_13569871-S | LBH          | 3 | -0.111  | -0.00454 | -3.92 | 9.22E-05 | 0.00370  |
| GI_7657101-S  | PGAP2        | 3 | -0.111  | -0.00501 | -3.92 | 9.51E-05 | 0.00379  |
| GI_22062022-S | TMEM41B      | 3 | -0.110  | -0.00300 | -3.90 | 0.000103 | 0.00403  |
| GI_12232446-S | CRTC3        | 3 | -0.110  | -0.00290 | -3.89 | 0.000105 | 0.00411  |
| GI_31542322-S | CRIP2        | 3 | 0.110   | 0.00942  | 3.89  | 0.000105 | 0.00411  |
| GI_16905512-S | RPLP2        | 3 | -0.110  | -0.00237 | -3.89 | 0.000106 | 0.00415  |
| GI_29735368-S | PP7080       | 3 | -0.110  | -0.00391 | -3.89 | 0.000107 | 0.00418  |
| GI_19923670-S | FOXP1        | 3 | -0.110  | -0.00367 | -3.87 | 0.000114 | 0.00437  |
| GI_40255167-S | TSHZ2        | 3 | 0.109   | 0.0169   | 3.85  | 0.000123 | 0.00469  |
| GI_28144902-S | IL23A        | 3 | -0.109  | -0.00632 | -3.84 | 0.000129 | 0.00486  |
| GI_4503718-S  | FHIT         | 3 | -0.107  | -0.00787 | -3.80 | 0.000150 | 0.00552  |
| GI_5453610-S  | CD28         | 3 | -0.107  | -0.00510 | -3.79 | 0.000155 | 0.00566  |
| Hs.137587-S   | LOC643733    | 3 | 0.107   | 0.00532  | 3.77  | 0.000169 | 0.00605  |
| GI_4758719-S  | MLLT3        | 3 | -0.106  | -0.00383 | -3.75 | 0.000187 | 0.00659  |
| GI_42659994-S | ---          | 3 | -0.105  | -0.00342 | -3.72 | 0.000211 | 0.00728  |
| GI_28610150-S | IL7R         | 3 | -0.105  | -0.00596 | -3.71 | 0.000215 | 0.00738  |
| GI_7662075-S  | KIAA0355     | 3 | -0.104  | -0.00234 | -3.65 | 0.000271 | 0.00893  |
| GI_37551029-S | FAM171A1     | 3 | -0.103  | -0.0111  | -3.63 | 0.000296 | 0.00965  |
| GI_6996015-A  | LTB          | 3 | -0.100  | -0.00474 | -3.54 | 0.000410 | 0.0125   |
| GI_21361928-S | SLC38A1      | 3 | -0.100  | -0.00339 | -3.54 | 0.000415 | 0.0125   |
| GI_35038527-S | PASK         | 3 | -0.100  | -0.00666 | -3.53 | 0.000424 | 0.0128   |
| GI_9257221-S  | FOXO1        | 3 | -0.100  | -0.00397 | -3.53 | 0.000425 | 0.0128   |
| GI_12408664-A | MAL          | 3 | -0.0993 | -0.00545 | -3.51 | 0.000463 | 0.0137   |
| GI_4753158-S  | GTF3A        | 3 | -0.100  | -0.00207 | -3.50 | 0.000481 | 0.0141   |
| GI_18765693-S | DPP4         | 3 | -0.0970 | -0.00397 | -3.43 | 0.000631 | 0.0176   |
| GI_14110406-A | HNRNPDL      | 3 | -0.0967 | -0.00332 | -3.41 | 0.000662 | 0.0183   |
| GI_28827775-S | LY9          | 3 | -0.0962 | -0.00373 | -3.40 | 0.000706 | 0.0193   |

|               |          |   |         |          |       |          |          |
|---------------|----------|---|---------|----------|-------|----------|----------|
| Hs.439334-S   | ---      | 3 | 0.0954  | 0.00578  | 3.37  | 0.000767 | 0.0205   |
| Gl_7661651-S  | ZBTB20   | 3 | -0.0949 | -0.00271 | -3.35 | 0.000845 | 0.0222   |
| Hs.510761-S   | ---      | 3 | -0.0936 | -0.00655 | -3.31 | 0.000969 | 0.0246   |
| Gl_27500902-S | ---      | 3 | -0.0927 | -0.00234 | -3.27 | 0.001120 | 0.0276   |
| Gl_9966902-S  | MAN1C1   | 3 | -0.0914 | -0.00618 | -3.23 | 0.001272 | 0.0304   |
| Gl_24475729-S | CCDC65   | 3 | 0.0911  | 0.00699  | 3.22  | 0.001322 | 0.0312   |
| Gl_42661225-S | PRKCA    | 3 | -0.0894 | -0.00335 | -3.15 | 0.001652 | 0.0374   |
| Gl_42658639-S | KIAA1147 | 3 | -0.0888 | -0.00289 | -3.13 | 0.001781 | 0.0396   |
| Gl_20336210-I | GAMT     | 3 | -0.0880 | -0.00896 | -3.11 | 0.001908 | 0.0417   |
| Hs.349094-S   | TENM1    | 3 | -0.0871 | -0.00525 | -3.08 | 0.002150 | 0.0457   |
| Gl_21359840-S | TTC3     | 3 | -0.0867 | -0.00320 | -3.06 | 0.002281 | 0.0480   |
| Gl_42657549-S | ---      | 3 | -0.0869 | -0.00149 | -3.04 | 0.002389 | 0.0495   |
| Gl_4557268-S  | ADSL     | 4 | -0.205  | -0.00300 | -7.29 | 5.44E-13 | 1.64E-10 |
| Gl_31543180-S | PCYOX1L  | 4 | -0.203  | -0.00380 | -7.24 | 7.91E-13 | 2.30E-10 |
| Gl_13376239-S | ZNF671   | 4 | -0.195  | -0.00541 | -6.98 | 4.67E-12 | 1.14E-09 |
| Gl_37546867-S | WDR43    | 4 | -0.193  | -0.00485 | -6.90 | 8.41E-12 | 1.96E-09 |
| Gl_9558740-S  | FAM216A  | 4 | -0.191  | -0.00461 | -6.80 | 1.58E-11 | 3.49E-09 |
| Gl_22748624-S | ZNF439   | 4 | -0.183  | -0.00852 | -6.55 | 8.34E-11 | 1.56E-08 |
| Gl_21314689-S | NGLY1    | 4 | -0.169  | -0.00307 | -6.00 | 2.58E-09 | 3.57E-07 |
| Gl_5730016-S  | RPP40    | 4 | -0.165  | -0.00641 | -5.89 | 5.10E-09 | 6.60E-07 |
| Gl_39725714-S | ATIC     | 4 | -0.165  | -0.00331 | -5.86 | 5.91E-09 | 7.49E-07 |
| Gl_8923268-S  | TEX10    | 4 | -0.161  | -0.00304 | -5.69 | 1.62E-08 | 1.88E-06 |
| Gl_22748614-S | C12orf23 | 4 | -0.157  | -0.00704 | -5.58 | 2.93E-08 | 3.24E-06 |
| Gl_40786390-S | DNAJA3   | 4 | -0.152  | -0.00303 | -5.37 | 9.44E-08 | 9.37E-06 |
| Gl_7770073-A  | IARS     | 4 | -0.145  | -0.00331 | -5.14 | 3.12E-07 | 2.73E-05 |
| Gl_27482477-S | ---      | 4 | -0.143  | -0.00474 | -5.07 | 4.62E-07 | 3.83E-05 |
| Gl_22325391-S | TIGD7    | 4 | -0.138  | -0.00754 | -4.91 | 1.01E-06 | 7.72E-05 |
| Gl_24431963-S | HBS1L    | 4 | -0.138  | -0.00436 | -4.88 | 1.22E-06 | 9.02E-05 |
| Gl_23308516-S | ZNF75A   | 4 | -0.137  | -0.00535 | -4.84 | 1.43E-06 | 0.000103 |
| Gl_4757883-S  | LDLRAD4  | 4 | -0.135  | -0.00530 | -4.80 | 1.77E-06 | 0.000123 |
| Gl_12965196-S | GRAMD3   | 4 | -0.131  | -0.0190  | -4.65 | 3.64E-06 | 0.000236 |
| Gl_8923943-S  | NKRF     | 4 | -0.130  | -0.00360 | -4.61 | 4.36E-06 | 0.000275 |
| Gl_31415881-S | EXOSC8   | 4 | -0.130  | -0.00246 | -4.60 | 4.73E-06 | 0.000297 |
| Gl_32698917-S | NSUN6    | 4 | -0.129  | -0.00329 | -4.57 | 5.33E-06 | 0.000328 |
| Gl_38679908-S | TEX2     | 4 | -0.125  | -0.00407 | -4.42 | 1.09E-05 | 0.000625 |
| Gl_36287129-S | MRPS25   | 4 | -0.124  | -0.00574 | -4.38 | 1.28E-05 | 0.000722 |
| Gl_20336200-A | ATM      | 4 | -0.123  | -0.00633 | -4.36 | 1.43E-05 | 0.000790 |
| Gl_21362021-S | ZNF419   | 4 | -0.123  | -0.00286 | -4.35 | 1.50E-05 | 0.000826 |
| Gl_21717806-S | TBC1D31  | 4 | -0.122  | -0.00324 | -4.32 | 1.66E-05 | 0.000897 |
| Gl_34303962-A | POGLUT1  | 4 | -0.121  | -0.00228 | -4.28 | 2.05E-05 | 0.00107  |
| Gl_20127480-S | EPM2A    | 4 | -0.121  | -0.00326 | -4.27 | 2.06E-05 | 0.00108  |
| Gl_37594468-A | HIBCH    | 4 | -0.121  | -0.00367 | -4.26 | 2.18E-05 | 0.00112  |
| Gl_21265083-S | MRPL1    | 4 | -0.120  | -0.00246 | -4.24 | 2.35E-05 | 0.00119  |
| Gl_7669480-S  | BNIP3    | 4 | -0.120  | -0.00421 | -4.23 | 2.47E-05 | 0.00124  |
| Gl_23308510-S | ZFP3     | 4 | -0.119  | -0.00626 | -4.20 | 2.87E-05 | 0.00140  |
| Gl_34147689-S | DENND2D  | 4 | -0.119  | -0.00361 | -4.20 | 2.88E-05 | 0.00141  |
| Gl_42658518-S | ZNF789   | 4 | -0.118  | -0.00499 | -4.19 | 2.93E-05 | 0.00143  |
| Gl_11024703-S | TRMT13   | 4 | -0.118  | -0.00355 | -4.18 | 3.14E-05 | 0.00151  |
| Gl_31377626-S | NOC3L    | 4 | -0.118  | -0.00392 | -4.16 | 3.43E-05 | 0.00163  |
| Gl_42794755-S | ACSL5    | 4 | 0.118   | 0.00234  | 4.15  | 3.49E-05 | 0.00165  |
| Gl_23503246-S | TCEAL8   | 4 | -0.118  | -0.00258 | -4.15 | 3.52E-05 | 0.00166  |
| Gl_11034834-I | ---      | 4 | -0.117  | -0.00851 | -4.14 | 3.69E-05 | 0.00173  |
| Gl_45593129-S | GNL3     | 4 | -0.117  | -0.00398 | -4.13 | 3.83E-05 | 0.00178  |
| Gl_31341800-S | C5orf51  | 4 | -0.116  | -0.00425 | -4.12 | 4.07E-05 | 0.00186  |
| Gl_7706780-I  | ZNF226   | 4 | -0.114  | -0.00486 | -4.05 | 5.39E-05 | 0.00236  |
| Gl_4505430-S  | NPAT     | 4 | -0.113  | -0.00456 | -4.01 | 6.44E-05 | 0.00276  |
| Hs.493585-S   | ---      | 4 | -0.112  | -0.0127  | -3.99 | 7.13E-05 | 0.00299  |
| Gl_42656546-S | ANKAR    | 4 | -0.112  | -0.00499 | -3.97 | 7.71E-05 | 0.00319  |
| Gl_19913370-S | TBL1XR1  | 4 | -0.112  | -0.00256 | -3.93 | 8.83E-05 | 0.00356  |
| Gl_7661809-S  | TIMM21   | 4 | -0.111  | -0.00241 | -3.91 | 9.63E-05 | 0.00382  |
| Gl_39995081-S | NSUN2    | 4 | -0.112  | -0.00167 | -3.91 | 9.79E-05 | 0.00388  |
| Gl_40255000-S | N4BP2L2  | 4 | 0.110   | 0.00269  | 3.88  | 0.000109 | 0.00424  |
| Gl_40789232-S | COQ9     | 4 | -0.110  | -0.00179 | -3.88 | 0.000112 | 0.00432  |
| Gl_40789269-S | ZNF573   | 4 | -0.109  | -0.00372 | -3.87 | 0.000116 | 0.00445  |
| Gl_38201711-A | DDX17    | 4 | -0.109  | -0.00237 | -3.85 | 0.000124 | 0.00470  |
| Gl_33620772-S | KIAA0020 | 4 | -0.108  | -0.00276 | -3.82 | 0.000138 | 0.00513  |
| Gl_37552523-S | ---      | 4 | -0.108  | -0.0112  | -3.81 | 0.000145 | 0.00537  |
| Gl_28827773-S | DYRK4    | 4 | -0.108  | -0.00269 | -3.81 | 0.000147 | 0.00543  |
| Gl_41150782-S | OXLD1    | 4 | -0.107  | -0.00286 | -3.79 | 0.000161 | 0.00581  |
| Gl_42741681-S | ZRANB2   | 4 | -0.105  | -0.00338 | -3.72 | 0.000211 | 0.00728  |
| Gl_21327681-S | ACADM    | 4 | -0.104  | -0.00256 | -3.66 | 0.000267 | 0.00885  |
| Gl_21735567-S | CEPT1    | 4 | -0.104  | -0.00227 | -3.65 | 0.000274 | 0.00900  |
| Gl_33946328-S | RALA     | 4 | -0.103  | -0.00248 | -3.62 | 0.000309 | 0.00997  |
| Gl_40254985-S | HSDL2    | 4 | -0.102  | -0.00208 | -3.60 | 0.000328 | 0.0105   |
| Gl_38327028-S | UBE4A    | 4 | -0.102  | -0.00185 | -3.60 | 0.000333 | 0.0106   |
| Gl_14110410-I | HNRNPDL  | 4 | -0.101  | -0.00290 | -3.58 | 0.000361 | 0.0113   |
| Gl_16418033-S | N4BP2L1  | 4 | -0.102  | -0.00184 | -3.57 | 0.000369 | 0.0114   |
| Gl_4758293-S  | EPRS     | 4 | -0.101  | -0.00206 | -3.56 | 0.000380 | 0.0117   |
| Gl_6005726-S  | CCT8     | 4 | -0.100  | -0.00287 | -3.54 | 0.000415 | 0.0125   |
| Gl_29826334-S | EIF2S2   | 4 | -0.101  | -0.00157 | -3.53 | 0.000435 | 0.0130   |
| Gl_20149642-S | ZNHIT6   | 4 | -0.100  | -0.00283 | -3.53 | 0.000435 | 0.0130   |
| Gl_14149614-S | RPAIN    | 4 | -0.101  | -0.00155 | -3.52 | 0.000451 | 0.0134   |
| Gl_24308321-S | ZCCHC7   | 4 | -0.100  | -0.00343 | -3.52 | 0.000454 | 0.0135   |
| Gl_32307149-A | OGT      | 4 | -0.0990 | -0.00288 | -3.49 | 0.000498 | 0.0145   |
| Gl_26667176-S | MRPL46   | 4 | -0.0992 | -0.00206 | -3.49 | 0.000500 | 0.0146   |
| Gl_23618925-S | ZNF559   | 4 | -0.0983 | -0.00313 | -3.47 | 0.000540 | 0.0156   |
| Gl_37543284-S | ZNF594   | 4 | -0.0976 | -0.00964 | -3.45 | 0.000574 | 0.0164   |

|               |              |   |         |          |       |          |          |
|---------------|--------------|---|---------|----------|-------|----------|----------|
| GI_6912325-S  | FAM50B       | 4 | -0.0975 | -0.00596 | -3.45 | 0.000587 | 0.0166   |
| GI_16950599-S | MRPS31       | 4 | -0.0977 | -0.00274 | -3.44 | 0.000591 | 0.0167   |
| GI_17017972-S | RPL27        | 4 | -0.0979 | -0.00167 | -3.43 | 0.000619 | 0.0173   |
| GI_4504160-S  | GRSF1        | 4 | -0.0976 | -0.00171 | -3.42 | 0.000639 | 0.0178   |
| GI_28372492-S | CUL4B        | 4 | -0.0971 | -0.00182 | -3.41 | 0.000667 | 0.0184   |
| GI_21361826-S | METTL3       | 4 | -0.0959 | -0.00235 | -3.38 | 0.000751 | 0.0202   |
| GI_5729771-S  | CLN5         | 4 | -0.0956 | -0.00341 | -3.38 | 0.000757 | 0.0203   |
| GI_20336299-S | DHX32        | 4 | -0.0957 | -0.00245 | -3.37 | 0.000772 | 0.0206   |
| GI_38570159-S | XPO4         | 4 | -0.0954 | -0.00207 | -3.35 | 0.000821 | 0.0217   |
| GI_4826685-S  | DDX1         | 4 | -0.0946 | -0.00209 | -3.33 | 0.000896 | 0.0231   |
| GI_37550558-S | U2SURP       | 4 | -0.0942 | -0.00218 | -3.31 | 0.000943 | 0.0241   |
| GI_45446742-S | DDX42        | 4 | -0.0947 | -0.00135 | -3.31 | 0.000974 | 0.0247   |
| GI_21626467-S | ZNF638       | 4 | -0.0932 | -0.00242 | -3.28 | 0.001054 | 0.0263   |
| Hs.13250-S    | WDR33        | 4 | -0.0928 | -0.00362 | -3.28 | 0.001078 | 0.0268   |
| GI_20143932-A | RLN2         | 4 | -0.0926 | -0.00496 | -3.27 | 0.001105 | 0.0274   |
| GI_22035593-A | MRPL35       | 4 | -0.0925 | -0.00256 | -3.26 | 0.001148 | 0.0282   |
| GI_39930470-S | METTL25      | 4 | -0.0924 | -0.00246 | -3.26 | 0.001164 | 0.0284   |
| GI_21314666-S | CPSF3        | 4 | -0.0920 | -0.00176 | -3.23 | 0.001274 | 0.0304   |
| GI_22212923-I | NFX1         | 4 | -0.0917 | -0.00187 | -3.22 | 0.001301 | 0.0309   |
| GI_21361708-S | RPRD1A       | 4 | -0.0914 | -0.00246 | -3.22 | 0.001311 | 0.0310   |
| GI_32698693-S | DCUN1D4      | 4 | -0.0914 | -0.00228 | -3.22 | 0.001318 | 0.0312   |
| GI_24497452-S | NUP88        | 4 | -0.0914 | -0.00184 | -3.21 | 0.001356 | 0.0319   |
| GI_8922499-S  | SHQ1         | 4 | -0.0886 | -0.00268 | -3.12 | 0.001822 | 0.0402   |
| GI_25914753-A | MKKS         | 4 | -0.0876 | -0.00265 | -3.09 | 0.002069 | 0.0445   |
| GI_38257145-S | ANKRD46      | 4 | -0.0869 | -0.00568 | -3.07 | 0.002182 | 0.0463   |
| GI_32129211-S | ZSCAN32      | 4 | -0.0869 | -0.00238 | -3.06 | 0.002263 | 0.0477   |
| GI_39725646-S | ALG8         | 4 | -0.0872 | -0.00149 | -3.05 | 0.002302 | 0.0483   |
| GI_8923000-S  | ABHD10       | 4 | -0.0866 | -0.00266 | -3.05 | 0.002319 | 0.0485   |
| GI_15451891-S | EIF5B        | 4 | -0.0866 | -0.00214 | -3.05 | 0.002349 | 0.0490   |
| GI_24307912-S | ZNF234       | 4 | -0.0863 | -0.00363 | -3.05 | 0.002362 | 0.0492   |
| GI_4885496-S  | MYB          | 5 | -0.273  | -0.0100  | -9.97 | 1.46E-22 | 1.92E-19 |
| GI_4826869-S  | NUCB2        | 5 | -0.236  | -0.0111  | -8.54 | 4.00E-17 | 2.49E-14 |
| GI_7661743-S  | BZW2         | 5 | -0.218  | -0.00631 | -7.85 | 8.82E-15 | 3.79E-12 |
| GI_41352701-S | DPH2         | 5 | -0.218  | -0.00380 | -7.78 | 1.46E-14 | 5.91E-12 |
| GI_33356127-I | NAA16        | 5 | -0.195  | -0.00842 | -6.99 | 4.60E-12 | 1.13E-09 |
| GI_7661669-S  | SH3YL1       | 5 | -0.185  | -0.00692 | -6.62 | 5.33E-11 | 1.07E-08 |
| GI_37545625-S | TAF4B        | 5 | -0.180  | -0.00896 | -6.44 | 1.67E-10 | 3.00E-08 |
| GI_37595546-S | PDK1         | 5 | -0.179  | -0.00905 | -6.40 | 2.26E-10 | 3.87E-08 |
| GI_30425401-S | RPF2         | 5 | -0.178  | -0.00421 | -6.34 | 3.24E-10 | 5.36E-08 |
| GI_14110370-S | CDC16        | 5 | -0.178  | -0.00382 | -6.32 | 3.69E-10 | 6.03E-08 |
| GI_6806888-S  | HSF2         | 5 | -0.173  | -0.00505 | -6.18 | 8.55E-10 | 1.29E-07 |
| GI_15812220-S | RPL32        | 5 | -0.165  | -0.00280 | -5.83 | 7.18E-09 | 8.99E-07 |
| GI_22726178-S | LDHB         | 5 | -0.157  | -0.00674 | -5.58 | 3.01E-08 | 3.31E-06 |
| GI_31542492-S | DBP          | 5 | -0.151  | -0.00645 | -5.38 | 8.98E-08 | 9.03E-06 |
| GI_19743797-A | ZNF274       | 5 | -0.150  | -0.00354 | -5.32 | 1.22E-07 | 1.17E-05 |
| GI_37539232-S | EEF1B2       | 5 | -0.143  | -0.00497 | -5.09 | 4.21E-07 | 3.53E-05 |
| GI_45120103-S | MGC70870     | 5 | -0.143  | -0.00835 | -5.08 | 4.33E-07 | 3.61E-05 |
| GI_16757969-I | FAM129A      | 5 | 0.142   | 0.00375  | 5.04  | 5.25E-07 | 4.31E-05 |
| GI_16506300-S | EPB41L4A-AS1 | 5 | -0.142  | -0.00310 | -5.01 | 6.29E-07 | 5.10E-05 |
| GI_37546335-S | NOL11        | 5 | -0.141  | -0.00331 | -5.00 | 6.61E-07 | 5.31E-05 |
| GI_13518227-S | MCCC1        | 5 | -0.141  | -0.00334 | -4.99 | 6.82E-07 | 5.44E-05 |
| GI_29568100-S | ATP5L        | 5 | -0.138  | -0.00281 | -4.88 | 1.23E-06 | 9.03E-05 |
| GI_6631103-S  | EI24         | 5 | -0.136  | -0.00239 | -4.81 | 1.70E-06 | 0.000119 |
| GI_33942063-S | SEMA4D       | 5 | -0.130  | -0.00296 | -4.58 | 5.13E-06 | 0.000318 |
| GI_16936532-A | CDK4         | 5 | -0.129  | -0.00226 | -4.55 | 6.02E-06 | 0.000367 |
| GI_4505286-S  | IRF4         | 5 | -0.128  | -0.00623 | -4.52 | 6.64E-06 | 0.000401 |
| GI_5454101-S  | TACC3        | 5 | -0.126  | -0.00347 | -4.45 | 9.27E-06 | 0.000543 |
| GI_29550827-S | ACBD3        | 5 | -0.126  | -0.00260 | -4.45 | 9.32E-06 | 0.000546 |
| GI_31542291-S | CCT3         | 5 | -0.124  | -0.00395 | -4.38 | 1.27E-05 | 0.000717 |
| GI_25306276-S | GFM1         | 5 | -0.121  | -0.00282 | -4.26 | 2.22E-05 | 0.00114  |
| GI_14602425-S | SEC62        | 5 | -0.120  | -0.00243 | -4.23 | 2.49E-05 | 0.00125  |
| GI_24308126-S | DNAJC10      | 5 | -0.119  | -0.00360 | -4.20 | 2.81E-05 | 0.00138  |
| GI_31542714-S | TUG1         | 5 | -0.117  | -0.00292 | -4.14 | 3.68E-05 | 0.00173  |
| GI_12232418-S | S100BPB      | 5 | -0.116  | -0.00303 | -4.10 | 4.45E-05 | 0.00201  |
| GI_42476016-S | ACPL2        | 5 | -0.115  | -0.00515 | -4.09 | 4.63E-05 | 0.00209  |
| GI_42656629-S | RPL22        | 5 | -0.115  | -0.00597 | -4.09 | 4.67E-05 | 0.00210  |
| GI_34304340-A | PDCD4        | 5 | -0.115  | -0.00267 | -4.07 | 4.92E-05 | 0.00219  |
| GI_8923721-S  | UTP6         | 5 | -0.115  | -0.00231 | -4.05 | 5.43E-05 | 0.00238  |
| GI_42661295-S | ---          | 5 | -0.114  | -0.00292 | -4.02 | 6.27E-05 | 0.00271  |
| Hs.402644-S   | ---          | 5 | -0.113  | -0.00602 | -3.98 | 7.14E-05 | 0.00300  |
| GI_34222329-S | NOP58        | 5 | -0.113  | -0.00288 | -3.98 | 7.20E-05 | 0.00302  |
| GI_44890067-S | ZMYM4        | 5 | -0.112  | -0.00260 | -3.96 | 8.02E-05 | 0.00330  |
| GI_4557580-S  | FABP5        | 5 | -0.110  | -0.00552 | -3.91 | 9.82E-05 | 0.00388  |
| GI_23463298-S | ST13P4       | 5 | -0.109  | -0.00402 | -3.85 | 0.000123 | 0.00469  |
| GI_42659734-S | ---          | 5 | -0.109  | -0.00425 | -3.85 | 0.000127 | 0.00479  |
| GI_29728071-S | TBC1D9       | 5 | -0.108  | -0.00340 | -3.83 | 0.000133 | 0.00498  |
| GI_31340578-S | IQCG         | 5 | 0.108   | 0.00514  | 3.83  | 0.000133 | 0.00499  |
| GI_27886565-A | MALT1        | 5 | -0.107  | -0.00283 | -3.78 | 0.000161 | 0.00582  |
| GI_4507128-S  | SNRPE        | 5 | -0.107  | -0.00352 | -3.78 | 0.000166 | 0.00596  |
| GI_8923935-S  | USE1         | 5 | -0.106  | -0.00290 | -3.73 | 0.000198 | 0.00693  |
| GI_34304321-S | MRPL45       | 5 | -0.105  | -0.00346 | -3.70 | 0.000228 | 0.00780  |
| GI_42658709-S | RPL15        | 5 | -0.105  | -0.00322 | -3.69 | 0.000234 | 0.00795  |
| GI_24429563-I | ---          | 5 | -0.104  | -0.0143  | -3.68 | 0.000247 | 0.00832  |
| GI_21237722-S | ST13         | 5 | -0.103  | -0.00461 | -3.66 | 0.000264 | 0.00876  |
| GI_23111044-S | SNX4         | 5 | -0.102  | -0.00250 | -3.60 | 0.000328 | 0.0105   |
| GI_33624820-A | SEPT6        | 5 | -0.102  | -0.00330 | -3.60 | 0.000334 | 0.0106   |
| GI_39930468-S | RPF2         | 5 | -0.102  | -0.00475 | -3.59 | 0.000345 | 0.0109   |

|               |           |   |         |          |       |          |          |
|---------------|-----------|---|---------|----------|-------|----------|----------|
| GI_21362101-S | TMEM168   | 5 | -0.102  | -0.00315 | -3.59 | 0.000349 | 0.0110   |
| GI_23463288-S | ---       | 5 | -0.100  | -0.00337 | -3.53 | 0.000430 | 0.0129   |
| GI_4505276-S  | MTIF2     | 5 | -0.100  | -0.00247 | -3.53 | 0.000435 | 0.0130   |
| GI_23503310-S | TAPT1     | 5 | -0.100  | -0.0118  | -3.52 | 0.000440 | 0.0131   |
| GI_41146530-S | ---       | 5 | -0.0984 | -0.00337 | -3.47 | 0.000530 | 0.0154   |
| GI_37556035-S | ---       | 5 | -0.0980 | -0.00458 | -3.46 | 0.000549 | 0.0158   |
| GI_14042942-S | TATDN1    | 5 | -0.0978 | -0.00606 | -3.46 | 0.000562 | 0.0161   |
| GI_37545958-S | RBM25     | 5 | -0.0978 | -0.00237 | -3.44 | 0.000591 | 0.0167   |
| GI_15149469-S | SUZ12     | 5 | -0.0977 | -0.00221 | -3.44 | 0.000600 | 0.0169   |
| GI_12056464-S | FBL       | 5 | -0.0972 | -0.00331 | -3.43 | 0.000625 | 0.0175   |
| GI_33946314-I | NIN       | 5 | -0.0962 | -0.00319 | -3.40 | 0.000707 | 0.0193   |
| GI_21614500-A | DEGS1     | 5 | -0.0963 | -0.00201 | -3.39 | 0.000733 | 0.0198   |
| GI_16117795-A | RPL36     | 5 | -0.0966 | -0.00157 | -3.38 | 0.000741 | 0.0200   |
| GI_29337287-S | YEATS4    | 5 | -0.0950 | -0.00289 | -3.35 | 0.000833 | 0.0219   |
| GI_15011942-S | TRIM2     | 5 | 0.0944  | 0.0141   | 3.34  | 0.000865 | 0.0225   |
| GI_8922910-S  | RSAD1     | 5 | -0.0949 | -0.00216 | -3.34 | 0.000868 | 0.0226   |
| GI_37544033-S | RPL7      | 5 | -0.0937 | -0.00617 | -3.31 | 0.000958 | 0.0244   |
| GI_14210505-S | ZC3H8     | 5 | -0.0938 | -0.00262 | -3.30 | 0.000977 | 0.0248   |
| GI_7661579-I  | WIP12     | 5 | -0.0942 | -0.00170 | -3.30 | 0.000983 | 0.0249   |
| GI_7706680-S  | REV1      | 5 | -0.0929 | -0.00348 | -3.28 | 0.001067 | 0.0266   |
| GI_37622889-A | PLAGL1    | 5 | -0.0926 | -0.0152  | -3.27 | 0.001090 | 0.0270   |
| GI_42656857-S | SET       | 5 | -0.0928 | -0.00236 | -3.27 | 0.001116 | 0.0275   |
| GI_18373333-S | TMEM14B   | 5 | -0.0924 | -0.00340 | -3.26 | 0.001141 | 0.0280   |
| GI_19923618-S | EDEM3     | 5 | -0.0923 | -0.00363 | -3.26 | 0.001157 | 0.0283   |
| GI_31542314-S | CNOT8     | 5 | -0.0923 | -0.00204 | -3.25 | 0.001205 | 0.0292   |
| GI_41197110-S | ---       | 5 | -0.0921 | -0.00218 | -3.24 | 0.001218 | 0.0294   |
| GI_4758559-S  | SNRNP40   | 5 | -0.0920 | -0.00205 | -3.24 | 0.001245 | 0.0299   |
| GI_17482322-S | RPS15A    | 5 | -0.0917 | -0.00279 | -3.23 | 0.001249 | 0.0300   |
| GI_13376668-S | IFT74     | 5 | -0.0915 | -0.00431 | -3.23 | 0.001264 | 0.0303   |
| GI_9966792-S  | LZTFL1    | 5 | -0.0910 | -0.00303 | -3.21 | 0.001369 | 0.0322   |
| GI_13435382-S | TRMT61B   | 5 | -0.0908 | -0.00489 | -3.21 | 0.001373 | 0.0322   |
| GI_29735784-S | PPP1R3E   | 5 | -0.0902 | -0.00572 | -3.19 | 0.001479 | 0.0342   |
| GI_37541551-S | RPL10     | 5 | -0.0902 | -0.00304 | -3.18 | 0.001495 | 0.0345   |
| GI_8923576-S  | PAK1IP1   | 5 | -0.0892 | -0.00303 | -3.15 | 0.001688 | 0.0380   |
| GI_39725648-S | PAGR1     | 5 | -0.0890 | -0.00220 | -3.13 | 0.001769 | 0.0394   |
| Hs.448642-S   | RPS25     | 5 | -0.0886 | -0.00616 | -3.13 | 0.001786 | 0.0396   |
| GI_4507656-S  | TPP2      | 5 | -0.0885 | -0.00543 | -3.13 | 0.001810 | 0.0400   |
| GI_15718688-A | RPS3A     | 5 | -0.0890 | -0.00151 | -3.12 | 0.001876 | 0.0412   |
| GI_13376287-S | SETD6     | 5 | -0.0875 | -0.00259 | -3.08 | 0.002094 | 0.0449   |
| GI_4504190-S  | MSH6      | 5 | -0.0871 | -0.00260 | -3.07 | 0.002202 | 0.0466   |
| GI_37546978-S | UQCRH     | 5 | -0.0870 | -0.00266 | -3.07 | 0.002204 | 0.0466   |
| GI_39653322-I | PHF20L1   | 5 | -0.0868 | -0.00377 | -3.07 | 0.002223 | 0.0470   |
| GI_17454506-S | ---       | 5 | -0.0868 | -0.00275 | -3.06 | 0.002264 | 0.0477   |
| hmm14190-S    | RPLP1     | 5 | -0.0867 | -0.00392 | -3.06 | 0.002268 | 0.0477   |
| GI_21359821-S | DROSHA    | 5 | -0.0869 | -0.00169 | -3.05 | 0.002328 | 0.0486   |
| GI_13775598-S | SIRT1     | 5 | -0.0862 | -0.00281 | -3.04 | 0.002411 | 0.0499   |
| GI_42544152-S | LTK       | 6 | -0.299  | -0.0149  | -11.0 | 5.15E-27 | 1.35E-23 |
| GI_5803202-S  | TNNT3     | 6 | -0.292  | -0.0120  | -10.8 | 7.76E-26 | 1.67E-22 |
| GI_37548529-S | OBSCN     | 6 | -0.287  | -0.0123  | -10.5 | 7.44E-25 | 1.41E-21 |
| GI_4755145-S  | AEBP1     | 6 | -0.275  | -0.0164  | -10.0 | 6.96E-23 | 9.98E-20 |
| GI_40255313-S | OBSCN     | 6 | -0.267  | -0.0443  | -9.74 | 1.17E-21 | 1.32E-18 |
| GI_38569429-S | ATF7IP2   | 6 | -0.245  | -0.00708 | -8.88 | 2.38E-18 | 1.84E-15 |
| GI_42518079-S | TCF7      | 6 | -0.232  | -0.00843 | -8.39 | 1.32E-16 | 7.51E-14 |
| GI_37537721-S | AGMAT     | 6 | -0.222  | -0.0182  | -8.03 | 2.30E-15 | 1.10E-12 |
| Hs.150495-S   | ---       | 6 | 0.220   | 0.0215   | 7.95  | 4.13E-15 | 1.88E-12 |
| GI_37552337-S | ARRDC5    | 6 | -0.217  | -0.00502 | -7.80 | 1.30E-14 | 5.34E-12 |
| GI_20127439-S | MFSO10    | 6 | 0.218   | 0.00354  | 7.80  | 1.34E-14 | 5.45E-12 |
| GI_5174556-S  | MFGE8     | 6 | -0.216  | -0.00813 | -7.76 | 1.71E-14 | 6.63E-12 |
| GI_30150520-S | C1orf228  | 6 | -0.214  | -0.00611 | -7.67 | 3.38E-14 | 1.26E-11 |
| GI_4502010-S  | AK1       | 6 | 0.208   | 0.00823  | 7.49  | 1.32E-13 | 4.53E-11 |
| GI_18497287-S | LTBP3     | 6 | -0.204  | -0.0103  | -7.32 | 4.33E-13 | 1.33E-10 |
| GI_14249535-S | CIRH1A    | 6 | -0.199  | -0.00313 | -7.07 | 2.59E-12 | 6.62E-10 |
| GI_5453909-S  | PLCD1     | 6 | 0.196   | 0.00663  | 7.01  | 3.87E-12 | 9.59E-10 |
| GI_16507966-S | ENO2      | 6 | 0.193   | 0.00729  | 6.91  | 7.81E-12 | 1.84E-09 |
| GI_31542262-S | SLC17A9   | 6 | -0.184  | -0.00504 | -6.55 | 8.15E-11 | 1.53E-08 |
| GI_10835100-S | KAT2A     | 6 | -0.181  | -0.00543 | -6.47 | 1.39E-10 | 2.53E-08 |
| GI_37577150-S | SPEG      | 6 | -0.177  | -0.0140  | -6.34 | 3.17E-10 | 5.26E-08 |
| GI_4557514-S  | DDO2      | 6 | 0.170   | 0.00954  | 6.08  | 1.56E-09 | 2.26E-07 |
| Hs.483403-S   | ---       | 6 | -0.169  | -0.00896 | -6.03 | 2.18E-09 | 3.10E-07 |
| GI_7656870-S  | ZNF544    | 6 | -0.169  | -0.00408 | -6.00 | 2.58E-09 | 3.57E-07 |
| GI_22507400-S | MDS2      | 6 | -0.168  | -0.00960 | -5.99 | 2.74E-09 | 3.75E-07 |
| GI_23238255-A | CPT1B     | 6 | 0.168   | 0.00816  | 5.98  | 2.91E-09 | 3.93E-07 |
| GI_31341765-S | LINC01089 | 6 | -0.166  | -0.00568 | -5.90 | 4.59E-09 | 6.05E-07 |
| GI_19882236-S | RHPN1     | 6 | -0.162  | -0.0129  | -5.77 | 1.00E-08 | 1.22E-06 |
| GI_25914748-S | ABCC10    | 6 | 0.163   | 0.00283  | 5.75  | 1.12E-08 | 1.35E-06 |
| GI_24234723-A | TRADD     | 6 | 0.161   | 0.00316  | 5.72  | 1.36E-08 | 1.62E-06 |
| GI_22748640-S | CHMP7     | 6 | -0.160  | -0.00523 | -5.70 | 1.48E-08 | 1.74E-06 |
| GI_15619005-S | VIPR1     | 6 | -0.155  | -0.00482 | -5.53 | 3.98E-08 | 4.25E-06 |
| GI_31982913-S | WDR54     | 6 | 0.153   | 0.00327  | 5.42  | 6.97E-08 | 7.11E-06 |
| GI_7657350-S  | MYBBP1A   | 6 | -0.151  | -0.00326 | -5.35 | 1.03E-07 | 1.02E-05 |
| GI_34147678-S | HOOK1     | 6 | -0.149  | -0.00793 | -5.32 | 1.25E-07 | 1.19E-05 |
| GI_13376651-S | ATHL1     | 6 | -0.148  | -0.00718 | -5.25 | 1.80E-07 | 1.67E-05 |
| GI_23200030-A | TNFRSF25  | 6 | -0.147  | -0.00594 | -5.22 | 2.11E-07 | 1.94E-05 |
| GI_44890064-S | GCF2C     | 6 | -0.147  | -0.00322 | -5.21 | 2.20E-07 | 2.01E-05 |
| GI_37537686-S | ZNF444    | 6 | -0.141  | -0.00301 | -5.00 | 6.59E-07 | 5.31E-05 |
| GI_21361764-S | FOXRED1   | 6 | -0.141  | -0.00257 | -4.96 | 7.98E-07 | 6.26E-05 |
| GI_44680152-S | GOLGA2P7  | 6 | -0.139  | -0.00598 | -4.95 | 8.34E-07 | 6.49E-05 |

|               |                |   |         |          |       |          |          |
|---------------|----------------|---|---------|----------|-------|----------|----------|
| GI_12383073-S | TUT1           | 6 | -0.140  | -0.00308 | -4.94 | 8.78E-07 | 6.80E-05 |
| GI_34330189-S | HKR1           | 6 | -0.137  | -0.00381 | -4.86 | 1.35E-06 | 9.89E-05 |
| GI_9910257-S  | SDR39U1        | 6 | -0.137  | -0.00232 | -4.82 | 1.65E-06 | 0.000116 |
| GI_13375816-S | NEIL1          | 6 | -0.134  | -0.00562 | -4.76 | 2.20E-06 | 0.000150 |
| GI_13376184-S | RBFA           | 6 | -0.131  | -0.00359 | -4.63 | 4.00E-06 | 0.000256 |
| GI_22027610-S | TRAF1          | 6 | 0.131   | 0.00481  | 4.63  | 4.02E-06 | 0.000256 |
| GI_4504776-S  | ITGB7          | 6 | 0.130   | 0.00307  | 4.59  | 4.88E-06 | 0.000304 |
| GI_8923379-S  | OSGEP          | 6 | -0.130  | -0.00180 | -4.57 | 5.36E-06 | 0.000330 |
| GI_14249125-S | GTPBP3         | 6 | -0.129  | -0.00273 | -4.56 | 5.54E-06 | 0.000339 |
| GI_34577119-S | MTRF1          | 6 | -0.127  | -0.00259 | -4.49 | 7.62E-06 | 0.000456 |
| GI_19923288-S | PIK3CD         | 6 | -0.127  | -0.00226 | -4.46 | 9.10E-06 | 0.000535 |
| GI_42560245-I | POLR1C         | 6 | -0.125  | -0.00250 | -4.42 | 1.07E-05 | 0.000621 |
| GI_23503298-S | PRR22          | 6 | -0.125  | -0.00592 | -4.42 | 1.08E-05 | 0.000625 |
| GI_42659267-S | RP11-395P17.3  | 6 | -0.124  | -0.00441 | -4.40 | 1.19E-05 | 0.000678 |
| GI_5453923-S  | POLD2          | 6 | -0.124  | -0.00263 | -4.37 | 1.36E-05 | 0.000757 |
| GI_33598945-A | PLCG1          | 6 | -0.122  | -0.00397 | -4.33 | 1.59E-05 | 0.000867 |
| GI_26787961-A | AGER           | 6 | -0.123  | -0.00301 | -4.33 | 1.62E-05 | 0.000883 |
| GI_32261299-S | CYHR1          | 6 | -0.121  | -0.00414 | -4.28 | 2.06E-05 | 0.00107  |
| GI_42660343-S | DICER1-AS1     | 6 | -0.117  | -0.00407 | -4.15 | 3.61E-05 | 0.00170  |
| GI_7662449-S  | FAN1           | 6 | -0.117  | -0.00315 | -4.13 | 3.83E-05 | 0.00178  |
| GI_41327778-S | DDX55          | 6 | -0.118  | -0.00204 | -4.13 | 3.87E-05 | 0.00179  |
| GI_22779933-S | WDR19          | 6 | -0.116  | -0.00292 | -4.10 | 4.40E-05 | 0.00200  |
| GI_20336200-I | ---            | 6 | -0.115  | -0.00575 | -4.08 | 4.75E-05 | 0.00213  |
| GI_34101281-S | SCNN1D         | 6 | -0.115  | -0.00443 | -4.08 | 4.81E-05 | 0.00215  |
| GI_38708010-S | ---            | 6 | -0.115  | -0.00248 | -4.07 | 5.09E-05 | 0.00225  |
| GI_40255084-S | UBQLNL         | 6 | -0.113  | -0.00884 | -4.01 | 6.30E-05 | 0.00272  |
| GI_4507546-S  | TM7SF2         | 6 | -0.113  | -0.00360 | -4.01 | 6.43E-05 | 0.00276  |
| GI_7706484-S  | TRAP1          | 6 | -0.113  | -0.00307 | -4.00 | 6.82E-05 | 0.00289  |
| GI_34147388-S | PTGES3L-AARSD1 | 6 | -0.113  | -0.00215 | -3.98 | 7.44E-05 | 0.00310  |
| GI_24307946-S | HABP4          | 6 | 0.111   | 0.00339  | 3.92  | 9.52E-05 | 0.00379  |
| GI_33859830-S | POLR3C         | 6 | -0.111  | -0.00162 | -3.90 | 0.000101 | 0.00398  |
| GI_4885552-S  | ---            | 6 | -0.110  | -0.00237 | -3.89 | 0.000107 | 0.00416  |
| GI_11968044-S | INF2           | 6 | -0.110  | -0.00391 | -3.88 | 0.000109 | 0.00424  |
| GI_34147648-S | TLE2           | 6 | -0.109  | -0.00446 | -3.85 | 0.000126 | 0.00476  |
| GI_13376499-S | ---            | 6 | -0.107  | -0.00303 | -3.79 | 0.000160 | 0.00578  |
| GI_37563696-S | MEI1           | 6 | 0.107   | 0.00269  | 3.79  | 0.000160 | 0.00581  |
| GI_21717802-S | NSUN5P1        | 6 | -0.107  | -0.00273 | -3.78 | 0.000167 | 0.00600  |
| GI_4557650-S  | HSF4           | 6 | 0.107   | 0.00361  | 3.77  | 0.000173 | 0.00619  |
| GI_5453556-S  | ARIH2          | 6 | 0.107   | 0.00264  | 3.76  | 0.000178 | 0.00634  |
| GI_34147343-S | GRAMD1A        | 6 | -0.105  | -0.00247 | -3.68 | 0.000240 | 0.00813  |
| GI_4505462-S  | CNTNAP1        | 6 | 0.104   | 0.00568  | 3.68  | 0.000245 | 0.00828  |
| GI_9506614-S  | PRMT7          | 6 | -0.104  | -0.00229 | -3.68 | 0.000248 | 0.00834  |
| GI_41204979-S | PEAK1          | 6 | -0.104  | -0.00232 | -3.66 | 0.000262 | 0.00869  |
| GI_34222253-A | P4HTM          | 6 | 0.104   | 0.00271  | 3.66  | 0.000264 | 0.00876  |
| GI_20149710-S | SP140L         | 6 | -0.104  | -0.00213 | -3.65 | 0.000274 | 0.00901  |
| GI_8922734-S  | ELP2           | 6 | -0.104  | -0.00174 | -3.64 | 0.000282 | 0.00925  |
| GI_37540723-S | RNF214         | 6 | 0.103   | 0.00201  | 3.63  | 0.000299 | 0.00971  |
| GI_23312366-S | TNFRSF4        | 6 | 0.102   | 0.00479  | 3.62  | 0.000312 | 0.0101   |
| GI_12232402-S | C16orf58       | 6 | -0.102  | -0.00274 | -3.60 | 0.000336 | 0.0107   |
| GI_8922412-S  | ANKZF1         | 6 | -0.102  | -0.00241 | -3.59 | 0.000338 | 0.0107   |
| GI_30181232-S | SAP25          | 6 | -0.101  | -0.00412 | -3.58 | 0.000355 | 0.0111   |
| GI_42476295-S | TPM2           | 6 | -0.100  | -0.00638 | -3.55 | 0.000397 | 0.0121   |
| GI_27734876-S | TY SND1        | 6 | -0.101  | -0.00204 | -3.55 | 0.000399 | 0.0122   |
| GI_18105029-A | COLQ           | 6 | -0.0995 | -0.00443 | -3.52 | 0.000455 | 0.0135   |
| GI_37594443-S | ZMYND10        | 6 | 0.0991  | 0.00711  | 3.50  | 0.000474 | 0.0140   |
| GI_41281526-S | PAN2           | 6 | -0.100  | -0.00208 | -3.50 | 0.000479 | 0.0141   |
| GI_40807460-S | ZNF335         | 6 | 0.0965  | 0.00535  | 3.41  | 0.000668 | 0.0185   |
| GI_14149994-S | TMEM191A       | 6 | 0.0961  | 0.00250  | 3.39  | 0.000726 | 0.0197   |
| GI_34147521-S | ADCK3          | 6 | -0.0961 | -0.00159 | -3.37 | 0.000787 | 0.0210   |
| GI_32698941-S | SLC25A45       | 6 | -0.0947 | -0.00337 | -3.34 | 0.000854 | 0.0223   |
| GI_37622344-A | MZF1           | 6 | -0.0945 | -0.00210 | -3.32 | 0.000916 | 0.0236   |
| GI_31455610-S | ZAP70          | 6 | 0.0936  | 0.00329  | 3.30  | 0.000986 | 0.0250   |
| GI_4758291-S  | EPHB6          | 6 | -0.0930 | -0.00342 | -3.28 | 0.001055 | 0.0263   |
| GI_8923393-S  | TMEM161A       | 6 | -0.0932 | -0.00163 | -3.27 | 0.001108 | 0.0274   |
| GI_37655174-S | ZNF26          | 6 | -0.0924 | -0.00279 | -3.26 | 0.001147 | 0.0281   |
| GI_23346638-S | NPRL2          | 6 | 0.0928  | 0.00162  | 3.25  | 0.001177 | 0.0287   |
| GI_37547280-S | MEGF6          | 6 | -0.0919 | -0.00431 | -3.25 | 0.001196 | 0.0290   |
| GI_38524588-S | PNPLA7         | 6 | -0.0918 | -0.00404 | -3.24 | 0.001224 | 0.0295   |
| GI_13376422-S | TMEM156        | 6 | -0.0917 | -0.00312 | -3.24 | 0.001243 | 0.0299   |
| GI_15149471-S | PBX4           | 6 | 0.0908  | 0.00362  | 3.21  | 0.001381 | 0.0323   |
| GI_27480910-S | C9orf142       | 6 | 0.0912  | 0.00169  | 3.20  | 0.001406 | 0.0328   |
| GI_27485260-S | PHLDB3         | 6 | -0.0897 | -0.00410 | -3.17 | 0.001577 | 0.0360   |
| GI_37595557-I | BTN3A1         | 6 | 0.0894  | 0.00206  | 3.15  | 0.001694 | 0.0381   |
| GI_7661859-S  | LRRC14         | 6 | 0.0888  | 0.00261  | 3.13  | 0.001785 | 0.0396   |
| GI_4885224-I  | EWSR1          | 6 | -0.0891 | -0.00149 | -3.12 | 0.001850 | 0.0407   |
| GI_39812452-S | SURF6          | 6 | -0.0876 | -0.00187 | -3.08 | 0.002116 | 0.0452   |
| GI_45439340-S | PPOX           | 6 | -0.0867 | -0.00316 | -3.06 | 0.002286 | 0.0480   |
| GI_21536366-A | TAF1C          | 6 | -0.0868 | -0.00165 | -3.04 | 0.002382 | 0.0494   |
| GI_4758865-S  | NREP           | 7 | -0.275  | -0.00723 | -10.0 | 6.95E-23 | 9.98E-20 |
| GI_20336245-S | PCSK5          | 7 | -0.185  | -0.00500 | -6.61 | 5.54E-11 | 1.10E-08 |
| GI_31543835-S | NME8           | 7 | 0.180   | 0.00925  | 6.43  | 1.85E-10 | 3.25E-08 |
| GI_7662259-S  | KBTBD11        | 7 | -0.179  | -0.00770 | -6.41 | 2.02E-10 | 3.53E-08 |
| GI_41222688-S | RPL31P11       | 7 | -0.178  | -0.0101  | -6.36 | 2.86E-10 | 4.83E-08 |
| GI_13375757-S | C1orf54        | 7 | -0.147  | -0.00557 | -5.21 | 2.23E-07 | 2.02E-05 |
| GI_27734688-S | SSPO           | 7 | -0.143  | -0.0171  | -5.10 | 3.95E-07 | 3.36E-05 |
| GI_4506760-S  | S100A10        | 7 | 0.142   | 0.00568  | 5.04  | 5.47E-07 | 4.48E-05 |
| GI_8923223-I  | LRRFIP2        | 7 | 0.141   | 0.00292  | 4.97  | 7.69E-07 | 6.06E-05 |

|               |            |   |         |          |       |          |          |
|---------------|------------|---|---------|----------|-------|----------|----------|
| GI_27500713-S | ZIK1       | 7 | -0.137  | -0.00709 | -4.88 | 1.20E-06 | 8.89E-05 |
| GI_9845515-A  | S100A4     | 7 | 0.136   | 0.00481  | 4.84  | 1.48E-06 | 0.000106 |
| GI_8923764-S  | CACNA2D3   | 7 | -0.130  | -0.00794 | -4.63 | 4.04E-06 | 0.000258 |
| GI_16418454-S | RBP7       | 7 | -0.126  | -0.00563 | -4.48 | 7.99E-06 | 0.000476 |
| GI_11037064-S | ---        | 7 | -0.125  | -0.00482 | -4.42 | 1.09E-05 | 0.000630 |
| GI_17158002-S | ANTXR2     | 7 | 0.124   | 0.00246  | 4.38  | 1.29E-05 | 0.000726 |
| GI_31747574-S | CLEC5A     | 7 | -0.121  | -0.00849 | -4.30 | 1.88E-05 | 0.000997 |
| GI_40018619-S | TBC1D2B    | 7 | 0.121   | 0.00218  | 4.26  | 2.16E-05 | 0.00111  |
| GI_6912575-S  | PADI4      | 7 | -0.120  | -0.00455 | -4.24 | 2.42E-05 | 0.00122  |
| GI_7662375-S  | FAM13A     | 7 | 0.117   | 0.00483  | 4.14  | 3.71E-05 | 0.00173  |
| GI_22035639-S | MGST2      | 7 | -0.113  | -0.00300 | -4.00 | 6.59E-05 | 0.00281  |
| GI_33186919-S | ---        | 7 | -0.113  | -0.00908 | -4.00 | 6.79E-05 | 0.00288  |
| GI_40255259-S | PID1       | 7 | -0.113  | -0.00645 | -3.99 | 7.07E-05 | 0.00298  |
| GI_4557574-S  | FAAH       | 7 | -0.112  | -0.00544 | -3.95 | 8.20E-05 | 0.00335  |
| GI_21314670-S | TRPM4      | 7 | -0.111  | -0.00800 | -3.95 | 8.36E-05 | 0.00340  |
| GI_22095361-S | GLIPR2     | 7 | 0.110   | 0.00264  | 3.87  | 0.000113 | 0.00433  |
| GI_33589822-S | PK4        | 7 | 0.109   | 0.00672  | 3.87  | 0.000114 | 0.00437  |
| GI_4758707-S  | LY86       | 7 | -0.108  | -0.00274 | -3.82 | 0.000139 | 0.00516  |
| GI_27885012-S | C19orf59   | 7 | 0.108   | 0.00418  | 3.81  | 0.000147 | 0.00543  |
| Hs.466809-S   | ---        | 7 | -0.107  | -0.00569 | -3.77 | 0.000168 | 0.00604  |
| hmm5973-S     | MYO15B     | 7 | -0.106  | -0.00743 | -3.74 | 0.000195 | 0.00685  |
| GI_25072198-S | C11orf82   | 7 | -0.105  | -0.00557 | -3.72 | 0.000208 | 0.00720  |
| GI_31377572-S | DUSP18     | 7 | 0.100   | 0.00455  | 3.53  | 0.000432 | 0.0129   |
| GI_30158043-S | PTPRJ      | 7 | 0.0993  | 0.00313  | 3.51  | 0.000472 | 0.0139   |
| GI_19718745-A | OSBPL1A    | 7 | -0.0991 | -0.00383 | -3.50 | 0.000480 | 0.0141   |
| GI_19923275-S | ---        | 7 | -0.0981 | -0.0148  | -3.47 | 0.000541 | 0.0156   |
| GI_21536270-I | MPZL2      | 7 | -0.0972 | -0.00522 | -3.44 | 0.000607 | 0.0171   |
| GI_37552472-S | CLN8       | 7 | -0.0968 | -0.00372 | -3.42 | 0.000647 | 0.0180   |
| GI_11038652-S | AQP9       | 7 | 0.0962  | 0.00506  | 3.40  | 0.000696 | 0.0190   |
| GI_5713320-S  | SELL       | 7 | -0.0961 | -0.00441 | -3.39 | 0.000711 | 0.0194   |
| GI_31317229-S | FCER1A     | 7 | -0.0958 | -0.00628 | -3.39 | 0.000731 | 0.0198   |
| GI_13375978-S | BAHCC1     | 7 | -0.0949 | -0.00839 | -3.36 | 0.000817 | 0.0216   |
| GI_31542726-S | CPED1      | 7 | -0.0947 | -0.00750 | -3.35 | 0.000834 | 0.0220   |
| GI_45243500-S | BCL2L13    | 7 | -0.0952 | -0.00156 | -3.34 | 0.000876 | 0.0228   |
| GI_22749220-S | SPRED1     | 7 | 0.0931  | 0.00659  | 3.29  | 0.001030 | 0.0258   |
| GI_23308566-S | ASRGL1     | 7 | -0.0931 | -0.00731 | -3.29 | 0.001031 | 0.0258   |
| GI_30181235-S | CPNE2      | 7 | -0.0930 | -0.00314 | -3.28 | 0.001058 | 0.0264   |
| GI_37674209-S | SSH2       | 7 | -0.0933 | -0.00194 | -3.28 | 0.001066 | 0.0266   |
| GI_38348277-S | VSTM1      | 7 | -0.0924 | -0.0161  | -3.27 | 0.001116 | 0.0275   |
| GI_31543440-S | ---        | 7 | -0.0904 | -0.00192 | -3.18 | 0.001518 | 0.0349   |
| GI_19747277-S | RHOU       | 7 | 0.0897  | 0.00251  | 3.16  | 0.001604 | 0.0365   |
| Hs.525303-S   | ---        | 7 | -0.0875 | -0.00825 | -3.09 | 0.002032 | 0.0439   |
| GI_22749378-S | GAPT       | 7 | -0.0871 | -0.00362 | -3.08 | 0.002150 | 0.0457   |
| GI_19923329-S | CTDSP2     | 7 | -0.0872 | -0.00149 | -3.05 | 0.002307 | 0.0484   |
| GI_23397450-S | AMICA1     | 7 | -0.0865 | -0.00346 | -3.05 | 0.002328 | 0.0486   |
| Hs.233167-S   | ---        | 8 | -0.244  | -0.0179  | -8.87 | 2.60E-18 | 1.97E-15 |
| GI_30154358-S | AGPAT4     | 8 | 0.192   | 0.00534  | 6.86  | 1.08E-11 | 2.45E-09 |
| Hs.185140-S   | IPCEF1     | 8 | -0.168  | -0.00681 | -6.00 | 2.55E-09 | 3.56E-07 |
| Hs.370906-S   | ---        | 8 | -0.162  | -0.00943 | -5.77 | 1.03E-08 | 1.25E-06 |
| Hs.45184-S    | ---        | 8 | -0.160  | -0.00725 | -5.70 | 1.45E-08 | 1.72E-06 |
| Hs.397082-S   | ---        | 8 | -0.153  | -0.00779 | -5.43 | 6.64E-08 | 6.81E-06 |
| hmm15104-S    | SLC18B1    | 8 | -0.147  | -0.00366 | -5.21 | 2.15E-07 | 1.97E-05 |
| Hs.443639-S   | ---        | 8 | -0.146  | -0.00731 | -5.19 | 2.40E-07 | 2.16E-05 |
| Hs.436457-S   | ---        | 8 | 0.145   | 0.0222   | 5.15  | 3.04E-07 | 2.67E-05 |
| Hs.291277-S   | ---        | 8 | -0.136  | -0.00621 | -4.83 | 1.52E-06 | 0.000108 |
| GI_20475100-S | ---        | 8 | 0.133   | 0.00652  | 4.71  | 2.69E-06 | 0.000180 |
| Hs.119065-S   | ---        | 8 | -0.132  | -0.00606 | -4.68 | 3.13E-06 | 0.000206 |
| Hs.395295-S   | ---        | 8 | -0.129  | -0.00591 | -4.59 | 4.85E-06 | 0.000303 |
| Hs.437188-S   | ---        | 8 | -0.127  | -0.00804 | -4.50 | 7.60E-06 | 0.000456 |
| GI_22749246-S | CNST       | 8 | -0.120  | -0.00380 | -4.24 | 2.42E-05 | 0.00122  |
| hmm23672-S    | ---        | 8 | -0.119  | -0.00555 | -4.22 | 2.65E-05 | 0.00132  |
| Hs.12346-S    | ---        | 8 | -0.117  | -0.00359 | -4.13 | 3.94E-05 | 0.00181  |
| GI_42659368-S | PDCD11     | 8 | -0.116  | -0.00427 | -4.10 | 4.33E-05 | 0.00197  |
| Hs.348088-S   | ---        | 8 | 0.116   | 0.00680  | 4.10  | 4.50E-05 | 0.00203  |
| GI_29738101-S | ---        | 8 | -0.115  | -0.00520 | -4.06 | 5.21E-05 | 0.00230  |
| Hs.452445-S   | ---        | 8 | -0.115  | -0.00619 | -4.06 | 5.23E-05 | 0.00230  |
| Hs.465651-S   | ---        | 8 | -0.113  | -0.00528 | -4.01 | 6.50E-05 | 0.00279  |
| Hs.145444-S   | ---        | 8 | -0.108  | -0.00484 | -3.83 | 0.000135 | 0.00504  |
| Hs.171301-S   | ---        | 8 | 0.108   | 0.00645  | 3.83  | 0.000136 | 0.00509  |
| hmm2974-S     | MCF2L      | 8 | -0.108  | -0.00540 | -3.81 | 0.000148 | 0.00545  |
| GI_4507810-S  | UGCG       | 8 | -0.107  | -0.00335 | -3.80 | 0.000154 | 0.00562  |
| hmm11379-S    | RAB3GAP1   | 8 | -0.107  | -0.00307 | -3.76 | 0.000176 | 0.00629  |
| Hs.452714-S   | ---        | 8 | -0.104  | -0.00614 | -3.69 | 0.000234 | 0.00794  |
| Hs.472282-S   | ---        | 8 | -0.104  | -0.00441 | -3.67 | 0.000248 | 0.00836  |
| Hs.378028-S   | ---        | 8 | -0.104  | -0.00605 | -3.67 | 0.000252 | 0.00846  |
| GI_29747364-S | ---        | 8 | -0.103  | -0.00460 | -3.64 | 0.000288 | 0.00942  |
| GI_14149666-S | SARM1      | 8 | 0.102   | 0.00485  | 3.62  | 0.000303 | 0.00981  |
| GI_41114517-S | RPS16      | 8 | -0.101  | -0.00329 | -3.56 | 0.000391 | 0.0120   |
| GI_27485604-S | MAVS       | 8 | -0.0994 | -0.00367 | -3.51 | 0.000465 | 0.0138   |
| Hs.497573-S   | DICER1-AS1 | 8 | -0.0987 | -0.00443 | -3.49 | 0.000507 | 0.0148   |
| GI_42662645-S | ZNF275     | 8 | -0.0988 | -0.00292 | -3.49 | 0.000508 | 0.0148   |
| Hs.348319-S   | ---        | 8 | 0.0970  | 0.00449  | 3.43  | 0.000627 | 0.0175   |
| GI_12232372-S | RABGAP1    | 8 | -0.0964 | -0.00152 | -3.38 | 0.000759 | 0.0203   |
| Hs.368169-S   | ---        | 8 | 0.0950  | 0.00507  | 3.36  | 0.000808 | 0.0214   |
| Hs.194417-S   | ---        | 8 | -0.0947 | -0.00378 | -3.35 | 0.000845 | 0.0222   |
| Hs.508413-S   | ---        | 8 | -0.0940 | -0.00680 | -3.32 | 0.000921 | 0.0237   |
| hmm19663-S    | JMJD1C     | 8 | -0.0932 | -0.00312 | -3.29 | 0.001036 | 0.0259   |

|               |           |   |         |          |       |          |          |
|---------------|-----------|---|---------|----------|-------|----------|----------|
| GI_7661625-S  | SERBP1    | 8 | -0.0934 | -0.00152 | -3.27 | 0.001105 | 0.0274   |
| Hs.445048-S   | ---       | 8 | -0.0921 | -0.00285 | -3.25 | 0.001200 | 0.0291   |
| Hs.459570-S   | ANKRD18A  | 8 | 0.0914  | 0.00441  | 3.23  | 0.001280 | 0.0305   |
| Hs.473369-S   | ---       | 8 | 0.0914  | 0.00454  | 3.23  | 0.001282 | 0.0305   |
| GI_27499805-S | LINC00641 | 8 | -0.0909 | -0.00354 | -3.21 | 0.001368 | 0.0321   |
| Hs.471449-S   | ---       | 8 | -0.0903 | -0.00711 | -3.19 | 0.001455 | 0.0338   |
| GI_5902159-S  | ZNF22     | 8 | -0.0904 | -0.00283 | -3.19 | 0.001470 | 0.0340   |
| Hs.192103-S   | ---       | 8 | -0.0901 | -0.00309 | -3.18 | 0.001513 | 0.0348   |
| Hs.296713-S   | ---       | 8 | -0.0897 | -0.00433 | -3.17 | 0.001567 | 0.0358   |
| Hs.283500-S   | ---       | 8 | 0.0894  | 0.00277  | 3.15  | 0.001658 | 0.0375   |
| GI_38502313-S | C22orf34  | 8 | -0.0890 | -0.00582 | -3.14 | 0.001703 | 0.0383   |
| Hs.12867-S    | ---       | 8 | -0.0882 | -0.00554 | -3.12 | 0.001878 | 0.0412   |
| Hs.311881-S   | ---       | 8 | 0.0872  | 0.00694  | 3.08  | 0.002097 | 0.0449   |
| GI_13186319-A | METTL1    | 9 | -0.273  | -0.00628 | -9.93 | 2.07E-22 | 2.65E-19 |
| GI_6857817-S  | NPM3      | 9 | -0.257  | -0.00850 | -9.35 | 4.07E-20 | 3.69E-17 |
| GI_38045911-A | NME1      | 9 | -0.214  | -0.00468 | -7.65 | 3.97E-14 | 1.45E-11 |
| GI_22748804-S | C1orf216  | 9 | 0.210   | 0.00803  | 7.54  | 8.91E-14 | 3.17E-11 |
| GI_32171195-S | CENPV     | 9 | -0.207  | -0.00647 | -7.44 | 1.83E-13 | 6.09E-11 |
| GI_42476209-S | TMC04     | 9 | 0.202   | 0.00348  | 7.21  | 9.61E-13 | 2.75E-10 |
| GI_34147590-S | PUS1      | 9 | -0.202  | -0.00327 | -7.20 | 1.06E-12 | 2.99E-10 |
| GI_8923076-S  | ZNF586    | 9 | -0.193  | -0.00441 | -6.89 | 8.79E-12 | 2.04E-09 |
| GI_34222270-S | SFXN2     | 9 | -0.192  | -0.00817 | -6.89 | 9.10E-12 | 2.10E-09 |
| GI_4504688-S  | IMPDH2    | 9 | -0.190  | -0.00385 | -6.76 | 2.09E-11 | 4.57E-09 |
| GI_31657128-S | PFA5      | 9 | -0.184  | -0.00548 | -6.57 | 7.23E-11 | 1.37E-08 |
| GI_42542387-S | SFXN4     | 9 | -0.182  | -0.00480 | -6.49 | 1.25E-10 | 2.31E-08 |
| GI_11993934-S | CHI3L2    | 9 | -0.176  | -0.00741 | -6.29 | 4.47E-10 | 7.15E-08 |
| GI_41349477-S | PRDM7     | 9 | -0.173  | -0.00397 | -6.14 | 1.11E-09 | 1.64E-07 |
| GI_4885584-S  | SAE1      | 9 | -0.174  | -0.00259 | -6.13 | 1.18E-09 | 1.74E-07 |
| GI_38348207-S | C1orf122  | 9 | 0.166   | 0.00280  | 5.86  | 5.85E-09 | 7.44E-07 |
| GI_16554601-S | MRPS18B   | 9 | -0.160  | -0.00300 | -5.67 | 1.82E-08 | 2.09E-06 |
| GI_41352062-S | PFKP      | 9 | 0.158   | 0.00409  | 5.60  | 2.71E-08 | 3.02E-06 |
| GI_4885080-S  | ATP5G1    | 9 | -0.157  | -0.00246 | -5.53 | 3.92E-08 | 4.23E-06 |
| GI_21361347-S | UTP14A    | 9 | -0.153  | -0.00240 | -5.40 | 7.90E-08 | 8.00E-06 |
| GI_40317613-A | MRRF      | 9 | -0.151  | -0.00225 | -5.32 | 1.21E-07 | 1.17E-05 |
| GI_9558742-S  | CCDC106   | 9 | -0.150  | -0.00506 | -5.32 | 1.22E-07 | 1.17E-05 |
| GI_4507208-S  | SRM       | 9 | -0.150  | -0.00338 | -5.31 | 1.33E-07 | 1.26E-05 |
| GI_11968046-S | POLR1E    | 9 | -0.150  | -0.00308 | -5.30 | 1.39E-07 | 1.31E-05 |
| GI_22035587-A | MRPL24    | 9 | -0.148  | -0.00408 | -5.24 | 1.90E-07 | 1.75E-05 |
| GI_7706271-S  | DPH5      | 9 | -0.147  | -0.00362 | -5.22 | 2.05E-07 | 1.88E-05 |
| GI_13435349-A | FDXR      | 9 | 0.146   | 0.00403  | 5.19  | 2.46E-07 | 2.21E-05 |
| GI_14150140-S | PDCD2L    | 9 | -0.146  | -0.00452 | -5.18 | 2.55E-07 | 2.28E-05 |
| GI_31543400-S | PIM1      | 9 | 0.141   | 0.00418  | 5.01  | 6.22E-07 | 5.05E-05 |
| GI_28559082-A | CTPS2     | 9 | -0.139  | -0.00423 | -4.94 | 8.68E-07 | 6.74E-05 |
| GI_20070219-S | PRMT5     | 9 | -0.140  | -0.00268 | -4.93 | 9.32E-07 | 7.17E-05 |
| GI_39725941-S | C10orf2   | 9 | -0.136  | -0.00807 | -4.84 | 1.49E-06 | 0.000107 |
| GI_27478147-S | PTRH1     | 9 | 0.135   | 0.00695  | 4.78  | 1.92E-06 | 0.000132 |
| GI_24430136-S | LAGE3     | 9 | -0.135  | -0.00283 | -4.77 | 2.09E-06 | 0.000143 |
| GI_40353202-S | FAM219B   | 9 | 0.133   | 0.00203  | 4.68  | 3.14E-06 | 0.000206 |
| GI_19593984-S | SURF4     | 9 | 0.133   | 0.00211  | 4.68  | 3.15E-06 | 0.000206 |
| GI_20127554-S | ---       | 9 | -0.132  | -0.00279 | -4.66 | 3.45E-06 | 0.000225 |
| GI_7657121-S  | GEMIN4    | 9 | -0.132  | -0.00334 | -4.66 | 3.44E-06 | 0.000225 |
| GI_10835020-S | IGFBP4    | 9 | -0.128  | -0.00424 | -4.55 | 6.03E-06 | 0.000367 |
| GI_40254875-S | PDZD11    | 9 | 0.125   | 0.00219  | 4.40  | 1.18E-05 | 0.000671 |
| GI_22035625-S | CDS2      | 9 | 0.125   | 0.00213  | 4.39  | 1.21E-05 | 0.000687 |
| GI_22095396-S | CRELD1    | 9 | -0.124  | -0.00307 | -4.38 | 1.31E-05 | 0.000737 |
| GI_14249519-S | FAM136A   | 9 | -0.123  | -0.00261 | -4.35 | 1.45E-05 | 0.000802 |
| GI_17975596-S | SELM      | 9 | 0.122   | 0.00491  | 4.31  | 1.78E-05 | 0.000950 |
| GI_21614498-S | EZR       | 9 | 0.121   | 0.00377  | 4.28  | 2.03E-05 | 0.00106  |
| GI_7662339-S  | MORC2     | 9 | -0.121  | -0.00309 | -4.28 | 2.05E-05 | 0.00107  |
| GI_11386190-S | EIF2D     | 9 | -0.121  | -0.00330 | -4.26 | 2.18E-05 | 0.00112  |
| GI_15011919-S | NHP2      | 9 | -0.121  | -0.00206 | -4.26 | 2.23E-05 | 0.00114  |
| GI_40217837-I | WDR4      | 9 | -0.119  | -0.00326 | -4.22 | 2.66E-05 | 0.00132  |
| GI_34577121-S | NFKB1     | 9 | -0.119  | -0.00214 | -4.19 | 2.96E-05 | 0.00144  |
| GI_27498545-S | CCDC167   | 9 | 0.117   | 0.00336  | 4.13  | 3.89E-05 | 0.00180  |
| GI_15431296-A | RPL13     | 9 | -0.116  | -0.00309 | -4.08 | 4.69E-05 | 0.00211  |
| GI_7706199-S  | THEM6     | 9 | -0.114  | -0.00338 | -4.03 | 5.84E-05 | 0.00254  |
| GI_23110931-A | PSMB9     | 9 | 0.114   | 0.00253  | 4.03  | 5.86E-05 | 0.00254  |
| GI_23199997-A | NSUN5     | 9 | -0.112  | -0.00205 | -3.95 | 8.30E-05 | 0.00338  |
| GI_38327035-S | HAGH      | 9 | 0.111   | 0.00255  | 3.92  | 9.41E-05 | 0.00375  |
| GI_38683842-S | DNPH1     | 9 | -0.109  | -0.00296 | -3.84 | 0.000130 | 0.00488  |
| GI_13904869-S | RPS5      | 9 | -0.108  | -0.00254 | -3.82 | 0.000141 | 0.00524  |
| GI_31543422-S | POLE3     | 9 | -0.109  | -0.00142 | -3.81 | 0.000148 | 0.00545  |
| GI_32698695-S | TMEM97    | 9 | -0.108  | -0.00319 | -3.80 | 0.000150 | 0.00550  |
| GI_10835092-S | PTTG2     | 9 | 0.107   | 0.00392  | 3.80  | 0.000154 | 0.00562  |
| GI_4759187-S  | STX8      | 9 | 0.108   | 0.00179  | 3.79  | 0.000158 | 0.00573  |
| GI_33356546-S | MCM2      | 9 | -0.107  | -0.00313 | -3.77 | 0.000170 | 0.00610  |
| GI_39812361-S | PSMD8     | 9 | 0.107   | 0.00166  | 3.74  | 0.000192 | 0.00675  |
| GI_37059745-S | PEX5      | 9 | -0.106  | -0.00148 | -3.72 | 0.000208 | 0.00719  |
| GI_38679979-A | ACACA     | 9 | -0.105  | -0.00204 | -3.71 | 0.000217 | 0.00747  |
| GI_4885062-S  | ALDOC     | 9 | -0.104  | -0.00319 | -3.67 | 0.000256 | 0.00855  |
| GI_24308523-S | TMEM9     | 9 | -0.104  | -0.00184 | -3.65 | 0.000269 | 0.00888  |
| GI_30795226-S | DTD1      | 9 | 0.102   | 0.00300  | 3.58  | 0.000350 | 0.0110   |
| GI_14917112-S | SRPRB     | 9 | -0.100  | -0.00195 | -3.52 | 0.000446 | 0.0133   |
| GI_12751492-S | PYCRL     | 9 | -0.0991 | -0.00383 | -3.50 | 0.000481 | 0.0141   |
| GI_22749340-S | FAM76A    | 9 | 0.0985  | 0.00245  | 3.47  | 0.000536 | 0.0155   |
| GI_39725632-S | EXOSC7    | 9 | -0.0987 | -0.00166 | -3.46 | 0.000558 | 0.0160   |
| GI_37540621-S | NOP14     | 9 | -0.0982 | -0.00161 | -3.44 | 0.000602 | 0.0169   |

|               |           |    |         |          |       |          |          |
|---------------|-----------|----|---------|----------|-------|----------|----------|
| GI_7657197-S  | DIMT1     | 9  | -0.0980 | -0.00165 | -3.43 | 0.000614 | 0.0172   |
| GI_5032046-S  | POP7      | 9  | 0.0977  | 0.00180  | 3.43  | 0.000623 | 0.0174   |
| GI_34147613-S | OBFC1     | 9  | 0.0971  | 0.00172  | 3.41  | 0.000682 | 0.0187   |
| GI_21361595-S | TCEAL4    | 9  | -0.0960 | -0.00190 | -3.37 | 0.000765 | 0.0204   |
| GI_41872630-S | FASN      | 9  | -0.0937 | -0.00303 | -3.31 | 0.000969 | 0.0246   |
| GI_41393591-S | ADCK2     | 9  | 0.0940  | 0.00179  | 3.30  | 0.000988 | 0.0250   |
| GI_21361279-S | TSFM      | 9  | -0.0940 | -0.00160 | -3.29 | 0.001018 | 0.0255   |
| GI_24942125-S | SHMT2     | 9  | -0.0935 | -0.00163 | -3.28 | 0.001069 | 0.0266   |
| GI_17986251-I | SP110     | 9  | -0.0929 | -0.00148 | -3.25 | 0.001181 | 0.0287   |
| GI_38016923-S | PRKAB1    | 9  | 0.0917  | 0.00259  | 3.23  | 0.001266 | 0.0303   |
| GI_41107699-S | RPL18A    | 9  | -0.0904 | -0.00197 | -3.18 | 0.001524 | 0.0350   |
| GI_29741265-S | ETV2      | 9  | 0.0883  | 0.00418  | 3.12  | 0.001860 | 0.0409   |
| GI_42659182-S | SMU1      | 9  | -0.0885 | -0.00193 | -3.11 | 0.001898 | 0.0416   |
| GI_21735547-S | CEP250    | 9  | 0.0877  | 0.00245  | 3.09  | 0.002055 | 0.0443   |
| GI_19923786-S | RER1      | 9  | 0.0882  | 0.00130  | 3.08  | 0.002105 | 0.0450   |
| GI_31455613-S | DERL2     | 9  | 0.0870  | 0.00179  | 3.06  | 0.002289 | 0.0480   |
| GI_14150188-S | HVCN1     | 9  | -0.0866 | -0.00288 | -3.05 | 0.002318 | 0.0485   |
| GI_31560867-S | ITM2C     | 10 | -0.332  | -0.0122  | -12.3 | 4.01E-33 | 2.11E-29 |
| GI_31982900-S | SCD       | 10 | -0.275  | -0.0103  | -10.0 | 7.27E-23 | 1.01E-19 |
| GI_22547194-S | SREBF1    | 10 | -0.272  | -0.00832 | -9.93 | 2.14E-22 | 2.66E-19 |
| GI_27552763-S | TMEM8B    | 10 | -0.219  | -0.00595 | -7.89 | 6.47E-15 | 2.86E-12 |
| GI_42544137-S | EXOSC5    | 10 | -0.204  | -0.00560 | -7.30 | 5.28E-13 | 1.60E-10 |
| GI_23238206-S | TNFRSF21  | 10 | -0.202  | -0.0363  | -7.28 | 6.01E-13 | 1.80E-10 |
| GI_12545379-S | SCT       | 10 | -0.196  | -0.0331  | -7.04 | 3.25E-12 | 8.19E-10 |
| GI_41199582-S | LRRC26    | 10 | -0.194  | -0.00900 | -6.96 | 5.56E-12 | 1.34E-09 |
| GI_24308228-S | PACSLN1   | 10 | -0.192  | -0.0275  | -6.88 | 9.38E-12 | 2.15E-09 |
| GI_40804463-S | LAMP5     | 10 | -0.187  | -0.00954 | -6.70 | 3.25E-11 | 6.83E-09 |
| GI_42794770-A | ---       | 10 | -0.185  | -0.0107  | -6.64 | 4.74E-11 | 9.57E-09 |
| GI_18677769-S | C5orf20   | 10 | -0.184  | -0.0102  | -6.60 | 6.13E-11 | 1.19E-08 |
| GI_38454325-S | CD38      | 10 | -0.177  | -0.0112  | -6.31 | 3.86E-10 | 6.27E-08 |
| GI_39725933-S | SERPINF1  | 10 | -0.176  | -0.0181  | -6.30 | 4.19E-10 | 6.79E-08 |
| GI_6006016-S  | LGALS3BP  | 10 | -0.164  | -0.00870 | -5.85 | 6.25E-09 | 7.91E-07 |
| GI_21914880-S | LGMN      | 10 | -0.162  | -0.0150  | -5.79 | 9.04E-09 | 1.11E-06 |
| Hs.149078-S   | ---       | 10 | -0.159  | -0.0170  | -5.67 | 1.77E-08 | 2.04E-06 |
| GI_32483415-S | NEFH      | 10 | -0.158  | -0.0142  | -5.64 | 2.11E-08 | 2.39E-06 |
| GI_14574565-I | AI1       | 10 | -0.155  | -0.00907 | -5.51 | 4.35E-08 | 4.64E-06 |
| GI_42658673-S | LINC00996 | 10 | -0.153  | -0.0232  | -5.46 | 5.81E-08 | 6.04E-06 |
| GI_22748696-S | C12orf45  | 10 | -0.150  | -0.00498 | -5.33 | 1.16E-07 | 1.14E-05 |
| GI_45580689-S | CLEC4C    | 10 | -0.150  | -0.0235  | -5.32 | 1.20E-07 | 1.16E-05 |
| GI_5803120-S  | PDIA5     | 10 | -0.144  | -0.00764 | -5.12 | 3.53E-07 | 3.04E-05 |
| GI_31652260-S | MYBL2     | 10 | -0.142  | -0.0184  | -5.04 | 5.35E-07 | 4.39E-05 |
| GI_30179901-S | SOX4      | 10 | -0.141  | -0.00500 | -5.02 | 6.07E-07 | 4.94E-05 |
| GI_37539476-S | PPM1J     | 10 | -0.141  | -0.0112  | -5.00 | 6.52E-07 | 5.27E-05 |
| GI_31542664-S | LRRC36    | 10 | -0.141  | -0.0238  | -5.00 | 6.63E-07 | 5.32E-05 |
| GI_5803026-S  | IFI44L    | 10 | -0.140  | -0.0107  | -4.97 | 7.52E-07 | 5.93E-05 |
| GI_18490989-S | MX1       | 10 | -0.139  | -0.00639 | -4.93 | 9.41E-07 | 7.21E-05 |
| GI_4826697-S  | DNASE1L3  | 10 | -0.138  | -0.0102  | -4.90 | 1.08E-06 | 8.10E-05 |
| GI_42661292-S | SCD       | 10 | -0.138  | -0.0221  | -4.90 | 1.09E-06 | 8.18E-05 |
| Hs.458273-S   | MT1L      | 10 | 0.128   | 0.00845  | 4.52  | 6.64E-06 | 0.000401 |
| GI_17149847-S | FKBP5     | 10 | -0.127  | -0.00427 | -4.48 | 7.97E-06 | 0.000475 |
| Hs.203697-S   | ---       | 10 | -0.125  | -0.00765 | -4.45 | 9.49E-06 | 0.000554 |
| GI_25014108-S | C11orf31  | 10 | -0.126  | -0.00245 | -4.43 | 1.05E-05 | 0.000607 |
| GI_39930600-S | ALKBH7    | 10 | -0.124  | -0.00220 | -4.38 | 1.30E-05 | 0.000729 |
| GI_32313609-S | USP18     | 10 | -0.122  | -0.0128  | -4.34 | 1.52E-05 | 0.000836 |
| GI_11496992-S | PARP3     | 10 | 0.121   | 0.00580  | 4.30  | 1.83E-05 | 0.000972 |
| GI_22050996-S | PALD1     | 10 | -0.121  | -0.0174  | -4.30 | 1.84E-05 | 0.000975 |
| GI_34486095-S | RPL28     | 10 | -0.121  | -0.00324 | -4.29 | 1.93E-05 | 0.00102  |
| GI_11386142-S | SERPINF2  | 10 | -0.119  | -0.0168  | -4.23 | 2.47E-05 | 0.00124  |
| GI_20143965-A | KIF23     | 10 | -0.118  | -0.0106  | -4.20 | 2.85E-05 | 0.00140  |
| GI_6912245-S  | CD3EAP    | 10 | -0.118  | -0.00747 | -4.18 | 3.12E-05 | 0.00151  |
| GI_20302170-A | TLR9      | 10 | -0.118  | -0.0112  | -4.18 | 3.18E-05 | 0.00153  |
| GI_29171688-S | LILRA4    | 10 | -0.112  | -0.0205  | -3.98 | 7.26E-05 | 0.00303  |
| GI_21914861-A | CECR5     | 10 | -0.113  | -0.00254 | -3.97 | 7.52E-05 | 0.00312  |
| Hs.125087-S   | IFI44L    | 10 | -0.111  | -0.0189  | -3.93 | 9.01E-05 | 0.00363  |
| GI_4504584-S  | IFIT1     | 10 | -0.111  | -0.0114  | -3.93 | 9.08E-05 | 0.00365  |
| GI_4505672-S  | PDE6G     | 10 | -0.110  | -0.00936 | -3.91 | 9.62E-05 | 0.00382  |
| GI_24041025-S | NETO2     | 10 | -0.110  | -0.0163  | -3.90 | 0.000100 | 0.00396  |
| GI_9951914-S  | AHCY      | 10 | -0.110  | -0.00227 | -3.86 | 0.000120 | 0.00459  |
| GI_22538815-S | CCL8      | 10 | -0.108  | -0.0184  | -3.84 | 0.000129 | 0.00486  |
| GI_4758893-S  | PET112    | 10 | -0.108  | -0.00687 | -3.81 | 0.000146 | 0.00538  |
| GI_4506812-S  | SCN9A     | 10 | -0.106  | -0.0171  | -3.77 | 0.000170 | 0.00610  |
| GI_31542717-S | ECHDC3    | 10 | -0.106  | -0.0152  | -3.75 | 0.000182 | 0.00648  |
| GI_20336295-S | DDX28     | 10 | -0.105  | -0.00275 | -3.72 | 0.000209 | 0.00720  |
| GI_14150184-S | ZBED3     | 10 | -0.103  | -0.00898 | -3.66 | 0.000264 | 0.00876  |
| GI_37541363-S | RSL1D1    | 10 | -0.104  | -0.00402 | -3.66 | 0.000265 | 0.00879  |
| GI_7706082-S  | C1RL      | 10 | 0.103   | 0.00273  | 3.62  | 0.000306 | 0.00988  |
| GI_21361309-S | IFI44     | 10 | -0.101  | -0.00549 | -3.57 | 0.000374 | 0.0116   |
| GI_4557436-S  | CDC20     | 10 | -0.100  | -0.0127  | -3.53 | 0.000425 | 0.0128   |
| GI_16418460-S | TOP1MT    | 10 | -0.100  | -0.00656 | -3.53 | 0.000431 | 0.0129   |
| GI_34303916-S | FOXRED2   | 10 | -0.0990 | -0.00863 | -3.50 | 0.000478 | 0.0141   |
| GI_38570053-S | LYRM4     | 10 | -0.0971 | -0.0120  | -3.43 | 0.000616 | 0.0173   |
| GI_13162281-S | STS       | 10 | 0.0960  | 0.00453  | 3.39  | 0.000713 | 0.0194   |
| GI_17921981-S | COX10     | 10 | -0.0961 | -0.00300 | -3.39 | 0.000725 | 0.0197   |
| GI_25952086-S | KCNA5     | 10 | -0.0945 | -0.0148  | -3.34 | 0.000860 | 0.0225   |
| GI_42734367-S | DPH6      | 10 | -0.0943 | -0.00704 | -3.33 | 0.000880 | 0.0228   |
| GI_34147519-S | STX6      | 10 | 0.0943  | 0.00417  | 3.33  | 0.000889 | 0.0230   |
| GI_44890060-S | PPIB      | 10 | -0.0946 | -0.00193 | -3.33 | 0.000905 | 0.0233   |

|               |              |    |         |          |       |          |          |
|---------------|--------------|----|---------|----------|-------|----------|----------|
| Gl_37547044-S | C1orf228     | 10 | -0.0933 | -0.00753 | -3.30 | 0.001006 | 0.0253   |
| Gl_27735126-S | SLC35F3      | 10 | -0.0932 | -0.0151  | -3.30 | 0.001008 | 0.0254   |
| Gl_16950627-I | AP1S1        | 10 | 0.0919  | 0.00511  | 3.25  | 0.001204 | 0.0292   |
| Gl_17025229-S | KCNK17       | 10 | -0.0917 | -0.0159  | -3.24 | 0.001216 | 0.0293   |
| Gl_26787980-A | IL15RA       | 10 | 0.0900  | 0.0119   | 3.18  | 0.001506 | 0.0347   |
| Gl_7669493-A  | GCDH         | 10 | -0.0898 | -0.00502 | -3.17 | 0.001542 | 0.0354   |
| Gl_31342325-S | NMNAT3       | 10 | -0.0892 | -0.00661 | -3.15 | 0.001656 | 0.0375   |
| Gl_4557342-S  | ALDH7A1      | 10 | -0.0884 | -0.0109  | -3.12 | 0.001831 | 0.0404   |
| Gl_27881483-S | ZC3H7B       | 10 | 0.0883  | 0.0109   | 3.12  | 0.001844 | 0.0406   |
| Gl_21040270-S | NLRP7        | 10 | -0.0879 | -0.00992 | -3.11 | 0.001938 | 0.0422   |
| Gl_4759305-S  | LIN7A        | 10 | 0.0877  | 0.0126   | 3.10  | 0.001984 | 0.0431   |
| Gl_13775237-S | PLVAP        | 10 | -0.0869 | -0.00800 | -3.07 | 0.002187 | 0.0464   |
| Gl_41352698-S | WARS2        | 10 | -0.0866 | -0.00442 | -3.06 | 0.002267 | 0.0477   |
| Gl_16306577-A | FBXL6        | 10 | 0.0862  | 0.00427  | 3.04  | 0.002386 | 0.0495   |
| Gl_41281388-S | NRCAM        | 11 | -0.381  | -0.0687  | -14.5 | 3.37E-44 | 3.98E-40 |
| Gl_38564321-S | ZNF154       | 11 | -0.326  | -0.0258  | -12.2 | 3.37E-32 | 1.59E-28 |
| Gl_23308576-S | PHGDH        | 11 | -0.291  | -0.0241  | -10.7 | 1.46E-25 | 3.00E-22 |
| Gl_4503664-S  | FBLN2        | 11 | -0.277  | -0.0283  | -10.2 | 2.23E-23 | 3.40E-20 |
| Gl_14589910-A | MMP28        | 11 | -0.247  | -0.0389  | -8.96 | 1.16E-18 | 9.13E-16 |
| Gl_29747011-S | PLEKHG4      | 11 | -0.242  | -0.0450  | -8.79 | 5.02E-18 | 3.44E-15 |
| Gl_22749362-S | FBXO15       | 11 | -0.229  | -0.0379  | -8.26 | 3.57E-16 | 1.92E-13 |
| Gl_15011978-A | ARHGEF4      | 11 | -0.225  | -0.0398  | -8.11 | 1.19E-15 | 5.98E-13 |
| Gl_21389428-S | TMIGD2       | 11 | -0.217  | -0.0114  | -7.83 | 1.06E-14 | 4.49E-12 |
| Gl_37549771-S | TTC24        | 11 | -0.217  | -0.0317  | -7.82 | 1.15E-14 | 4.83E-12 |
| Gl_14165275-S | C2orf40      | 11 | -0.216  | -0.0298  | -7.77 | 1.61E-14 | 6.29E-12 |
| Gl_10863910-S | SPINK2       | 11 | -0.212  | -0.0357  | -7.66 | 3.86E-14 | 1.43E-11 |
| Gl_28144896-A | AK5          | 11 | -0.212  | -0.0359  | -7.65 | 4.02E-14 | 1.46E-11 |
| Gl_38788425-S | NOG          | 11 | -0.204  | -0.0335  | -7.34 | 3.75E-13 | 1.17E-10 |
| Hs.500643-S   | RNF157-AS1   | 11 | -0.202  | -0.0230  | -7.27 | 6.54E-13 | 1.94E-10 |
| Gl_31377628-S | CPA5         | 11 | -0.202  | -0.0338  | -7.25 | 7.22E-13 | 2.12E-10 |
| hmm3032-S     | ---          | 11 | -0.201  | -0.0312  | -7.23 | 8.71E-13 | 2.51E-10 |
| Gl_7110714-S  | SEC14L2      | 11 | -0.200  | -0.0318  | -7.19 | 1.13E-12 | 3.18E-10 |
| Gl_19743835-S | TARBP1       | 11 | -0.200  | -0.00658 | -7.17 | 1.29E-12 | 3.55E-10 |
| Gl_34304373-S | CDK5R1       | 11 | -0.200  | -0.00924 | -7.17 | 1.32E-12 | 3.60E-10 |
| Gl_42658866-S | MTUS1        | 11 | -0.199  | -0.0316  | -7.14 | 1.56E-12 | 4.12E-10 |
| Gl_37552330-S | ZFR2         | 11 | -0.185  | -0.0266  | -6.61 | 5.68E-11 | 1.12E-08 |
| Gl_4502798-S  | CHAD         | 11 | -0.181  | -0.0169  | -6.48 | 1.29E-10 | 2.36E-08 |
| Gl_4505854-S  | PLAG1        | 11 | -0.181  | -0.0186  | -6.47 | 1.38E-10 | 2.52E-08 |
| Gl_8051576-A  | ABCG1        | 11 | -0.179  | -0.00959 | -6.39 | 2.31E-10 | 3.94E-08 |
| Gl_37540666-S | GPR125       | 11 | -0.178  | -0.0237  | -6.35 | 2.99E-10 | 5.02E-08 |
| Gl_29789280-S | TSPYL5       | 11 | -0.177  | -0.0240  | -6.33 | 3.42E-10 | 5.62E-08 |
| Gl_34147323-S | SERPINE2     | 11 | -0.176  | -0.0266  | -6.29 | 4.44E-10 | 7.13E-08 |
| Gl_34419632-S | ZNF135       | 11 | -0.171  | -0.0274  | -6.11 | 1.31E-09 | 1.91E-07 |
| Gl_34222164-S | ZNF502       | 11 | -0.168  | -0.0172  | -5.98 | 2.87E-09 | 3.89E-07 |
| Gl_16933556-S | DCHS1        | 11 | -0.167  | -0.0267  | -5.96 | 3.22E-09 | 4.34E-07 |
| Hs.449572-S   | ---          | 11 | -0.162  | -0.0313  | -5.78 | 9.29E-09 | 1.14E-06 |
| Gl_18593550-S | ---          | 11 | -0.161  | -0.0135  | -5.73 | 1.26E-08 | 1.51E-06 |
| Gl_17975754-I | MSL3         | 11 | -0.160  | -0.00310 | -5.66 | 1.91E-08 | 2.17E-06 |
| Gl_32698741-S | CACHD1       | 11 | -0.156  | -0.0239  | -5.54 | 3.60E-08 | 3.90E-06 |
| hmm35424-S    | ---          | 11 | -0.155  | -0.0239  | -5.51 | 4.43E-08 | 4.71E-06 |
| Gl_37540914-S | HYKK         | 11 | -0.154  | -0.0180  | -5.47 | 5.36E-08 | 5.64E-06 |
| Gl_37540696-S | ROBO3        | 11 | -0.153  | -0.00941 | -5.46 | 5.60E-08 | 5.86E-06 |
| Gl_14249635-S | TOX2         | 11 | -0.153  | -0.0269  | -5.46 | 5.85E-08 | 6.07E-06 |
| Gl_30153083-S | ---          | 11 | -0.153  | -0.0242  | -5.45 | 6.14E-08 | 6.34E-06 |
| Gl_32528300-S | EPHB4        | 11 | -0.152  | -0.0121  | -5.41 | 7.71E-08 | 7.82E-06 |
| Gl_21389548-S | PSMA8        | 11 | -0.151  | -0.0241  | -5.38 | 9.08E-08 | 9.09E-06 |
| Gl_18597568-S | ---          | 11 | -0.150  | -0.0233  | -5.32 | 1.20E-07 | 1.16E-05 |
| Gl_39932584-S | STOX1        | 11 | -0.144  | -0.0235  | -5.14 | 3.19E-07 | 2.78E-05 |
| Gl_30794499-S | KDM1A        | 11 | -0.144  | -0.00226 | -5.06 | 4.72E-07 | 3.91E-05 |
| Gl_37574602-S | ZNF256       | 11 | -0.140  | -0.00953 | -4.98 | 7.15E-07 | 5.69E-05 |
| Hs.191828-S   | ---          | 11 | -0.140  | -0.0149  | -4.96 | 7.93E-07 | 6.23E-05 |
| Hs.293510-S   | ---          | 11 | -0.137  | -0.0258  | -4.88 | 1.20E-06 | 8.89E-05 |
| Gl_11641230-S | EDAR         | 11 | -0.137  | -0.00845 | -4.85 | 1.40E-06 | 0.000102 |
| Gl_38566701-S | ZNF285       | 11 | -0.136  | -0.0160  | -4.83 | 1.52E-06 | 0.000108 |
| Hs.289062-S   | ---          | 11 | -0.136  | -0.0159  | -4.83 | 1.53E-06 | 0.000108 |
| Gl_13435360-A | DSC1         | 11 | -0.135  | -0.0228  | -4.79 | 1.83E-06 | 0.000127 |
| Gl_27886606-A | PTK7         | 11 | -0.134  | -0.0198  | -4.77 | 2.06E-06 | 0.000142 |
| Gl_31543612-S | SCML1        | 11 | -0.134  | -0.0120  | -4.77 | 2.08E-06 | 0.000143 |
| Gl_40788000-I | SPRY1        | 11 | -0.133  | -0.0105  | -4.71 | 2.71E-06 | 0.000180 |
| Gl_37546955-S | DNAH6        | 11 | -0.132  | -0.0110  | -4.70 | 2.94E-06 | 0.000195 |
| Gl_19923369-S | KDM5B        | 11 | -0.133  | -0.00335 | -4.70 | 2.96E-06 | 0.000196 |
| Gl_29171718-A | GPLD1        | 11 | -0.131  | -0.0203  | -4.67 | 3.40E-06 | 0.000222 |
| Gl_31377838-S | ZNF606       | 11 | -0.131  | -0.0213  | -4.64 | 3.84E-06 | 0.000248 |
| Hs.158943-S   | LOC100131289 | 11 | -0.130  | -0.0199  | -4.62 | 4.26E-06 | 0.000270 |
| Gl_20558478-S | ---          | 11 | 0.129   | 0.0184   | 4.59  | 4.96E-06 | 0.000308 |
| Gl_21284386-I | ABLIM1       | 11 | -0.129  | -0.0178  | -4.58 | 5.23E-06 | 0.000323 |
| Gl_44889961-A | STMN1        | 11 | -0.127  | -0.00613 | -4.52 | 6.90E-06 | 0.000416 |
| Gl_24307966-S | SRGAP3       | 11 | -0.126  | -0.0193  | -4.47 | 8.72E-06 | 0.000516 |
| hmm10289-S    | ---          | 11 | -0.126  | -0.0190  | -4.46 | 8.78E-06 | 0.000519 |
| Gl_42661702-S | ---          | 11 | -0.125  | -0.0229  | -4.45 | 9.50E-06 | 0.000554 |
| Gl_27481523-S | FLJ37453     | 11 | -0.124  | -0.00402 | -4.40 | 1.17E-05 | 0.000671 |
| Hs.170303-S   | ---          | 11 | -0.123  | -0.0205  | -4.37 | 1.37E-05 | 0.000763 |
| Hs.450384-S   | NPM1         | 11 | -0.123  | -0.0124  | -4.36 | 1.42E-05 | 0.000787 |
| Gl_37546364-S | METTL1       | 11 | -0.123  | -0.00544 | -4.35 | 1.45E-05 | 0.000803 |
| Hs.5855-S     | LOC100288152 | 11 | -0.123  | -0.0132  | -4.35 | 1.46E-05 | 0.000804 |
| hmm22840-S    | FLYWCH1      | 11 | -0.122  | -0.0199  | -4.34 | 1.54E-05 | 0.000843 |
| Hs.302274-S   | ---          | 11 | 0.122   | 0.0111   | 4.33  | 1.64E-05 | 0.000888 |

|               |              |    |         |          |       |          |          |
|---------------|--------------|----|---------|----------|-------|----------|----------|
| GI_10092690-S | TJP3         | 11 | 0.122   | 0.00868  | 4.32  | 1.66E-05 | 0.000897 |
| GI_27734858-S | RNF175       | 11 | -0.122  | -0.0209  | -4.32 | 1.68E-05 | 0.000906 |
| hmm10292-S    | ---          | 11 | -0.122  | -0.0202  | -4.32 | 1.71E-05 | 0.000916 |
| GI_14043043-A | CCR9         | 11 | -0.122  | -0.00607 | -4.31 | 1.73E-05 | 0.000930 |
| GI_7262383-A  | KLRC1        | 11 | -0.121  | -0.0185  | -4.31 | 1.78E-05 | 0.000950 |
| hmm13194-S    | MTHFD2L      | 11 | -0.121  | -0.0111  | -4.28 | 1.97E-05 | 0.00104  |
| GI_31542938-S | HPGD         | 11 | -0.120  | -0.0189  | -4.27 | 2.15E-05 | 0.00111  |
| GI_41327765-A | ARMCX2       | 11 | -0.119  | -0.00972 | -4.22 | 2.58E-05 | 0.00129  |
| GI_37542865-S | ---          | 11 | -0.119  | -0.0169  | -4.22 | 2.59E-05 | 0.00129  |
| GI_22059218-S | KLHL14       | 11 | -0.119  | -0.0214  | -4.22 | 2.66E-05 | 0.00132  |
| GI_37545966-S | YLP1M1       | 11 | -0.120  | -0.00196 | -4.20 | 2.89E-05 | 0.00142  |
| GI_24308244-S | RMI2         | 11 | -0.118  | -0.0126  | -4.18 | 3.07E-05 | 0.00149  |
| GI_32307162-A | AKT3         | 11 | 0.117   | 0.0192   | 4.16  | 3.33E-05 | 0.00159  |
| GI_31652245-I | TNFRSF19     | 11 | -0.117  | -0.0167  | -4.15 | 3.49E-05 | 0.00165  |
| GI_42544176-S | CR2          | 11 | -0.117  | -0.0139  | -4.14 | 3.67E-05 | 0.00172  |
| Hs.443284-S   | ---          | 11 | -0.117  | -0.00675 | -4.14 | 3.69E-05 | 0.00173  |
| Hs.483404-S   | ---          | 11 | -0.116  | -0.0190  | -4.13 | 3.93E-05 | 0.00180  |
| GI_5031560-S  | GPA33        | 11 | -0.116  | -0.0152  | -4.12 | 3.98E-05 | 0.00183  |
| GI_23065549-S | GSTM2        | 11 | -0.116  | -0.00538 | -4.10 | 4.37E-05 | 0.00198  |
| GI_37059768-S | LRRRC34      | 11 | -0.116  | -0.0132  | -4.10 | 4.41E-05 | 0.00200  |
| hmm20898-S    | ---          | 11 | 0.115   | 0.0189   | 4.09  | 4.53E-05 | 0.00205  |
| GI_31542705-S | PUS7         | 11 | -0.115  | -0.0181  | -4.09 | 4.56E-05 | 0.00206  |
| GI_26051274-S | KCNMB4       | 11 | -0.115  | -0.0203  | -4.07 | 4.90E-05 | 0.00219  |
| GI_21536348-A | ASIC1        | 11 | -0.114  | -0.0129  | -4.05 | 5.35E-05 | 0.00235  |
| GI_41406063-S | MYH10        | 11 | -0.114  | -0.0126  | -4.03 | 5.93E-05 | 0.00257  |
| Hs.27373-S    | FAM174B      | 11 | -0.113  | -0.0165  | -4.01 | 6.33E-05 | 0.00273  |
| GI_37655176-S | ZNF415       | 11 | -0.113  | -0.0190  | -4.00 | 6.70E-05 | 0.00285  |
| GI_38570100-A | TBC1D8B      | 11 | 0.113   | 0.0161   | 3.99  | 7.10E-05 | 0.00299  |
| Hs.483054-S   | ---          | 11 | -0.112  | -0.0127  | -3.96 | 7.90E-05 | 0.00326  |
| GI_20357538-A | ATP6V1G2     | 11 | -0.111  | -0.0189  | -3.95 | 8.25E-05 | 0.00337  |
| GI_29746868-S | ---          | 11 | -0.111  | -0.0149  | -3.94 | 8.76E-05 | 0.00354  |
| GI_32967299-A | C1QTNF6      | 11 | -0.111  | -0.0186  | -3.93 | 9.12E-05 | 0.00366  |
| GI_7705754-S  | PLLP         | 11 | -0.111  | -0.0107  | -3.92 | 9.26E-05 | 0.00371  |
| GI_42659932-S | ---          | 11 | -0.110  | -0.00933 | -3.90 | 0.000100 | 0.00394  |
| GI_37620211-S | ---          | 11 | -0.110  | -0.0188  | -3.90 | 0.000102 | 0.00401  |
| Hs.325015-S   | ---          | 11 | -0.110  | -0.0188  | -3.88 | 0.000110 | 0.00427  |
| GI_44680142-I | SLC23A1      | 11 | -0.109  | -0.0132  | -3.87 | 0.000116 | 0.00444  |
| GI_4505612-S  | PAWR         | 11 | -0.109  | -0.0163  | -3.86 | 0.000119 | 0.00455  |
| Hs.462423-S   | ---          | 11 | -0.108  | -0.0112  | -3.84 | 0.000129 | 0.00486  |
| GI_7657464-S  | PODXL2       | 11 | -0.108  | -0.0124  | -3.84 | 0.000130 | 0.00489  |
| GI_21071045-A | SMARCA1      | 11 | -0.107  | -0.0160  | -3.80 | 0.000153 | 0.00559  |
| GI_21396476-A | MEOX1        | 11 | 0.107   | 0.00913  | 3.79  | 0.000158 | 0.00573  |
| GI_38455419-S | RCA1N3       | 11 | -0.107  | -0.00670 | -3.78 | 0.000166 | 0.00599  |
| GI_42656307-S | EML6         | 11 | -0.106  | -0.0157  | -3.76 | 0.000177 | 0.00631  |
| Hs.506072-S   | LOC100506548 | 11 | -0.106  | -0.00467 | -3.76 | 0.000180 | 0.00641  |
| GI_4502408-S  | BICD1        | 11 | -0.106  | -0.00469 | -3.75 | 0.000189 | 0.00665  |
| GI_15451873-I | B3GALNT1     | 11 | -0.105  | -0.0158  | -3.71 | 0.000218 | 0.00749  |
| GI_45243513-A | ABC89        | 11 | -0.105  | -0.00836 | -3.71 | 0.000219 | 0.00752  |
| GI_42544116-I | ENOSF1       | 11 | -0.104  | -0.00738 | -3.70 | 0.000229 | 0.00780  |
| GI_37546893-S | MTA3         | 11 | -0.104  | -0.00832 | -3.68 | 0.000245 | 0.00828  |
| GI_8923455-A  | ANKMY1       | 11 | 0.104   | 0.0157   | 3.66  | 0.000258 | 0.00860  |
| GI_5453622-S  | CNKSR1       | 11 | -0.103  | -0.0117  | -3.66 | 0.000260 | 0.00864  |
| GI_21361365-S | IFRD2        | 11 | -0.104  | -0.00282 | -3.66 | 0.000268 | 0.00886  |
| GI_17437334-S | RPLP1        | 11 | -0.103  | -0.00346 | -3.65 | 0.000268 | 0.00887  |
| GI_7661883-S  | HELZ         | 11 | -0.104  | -0.00202 | -3.65 | 0.000271 | 0.00893  |
| GI_31317254-S | NLGN2        | 11 | -0.103  | -0.0167  | -3.65 | 0.000278 | 0.00914  |
| hmm23789-S    | ---          | 11 | -0.103  | -0.0142  | -3.63 | 0.000297 | 0.00967  |
| GI_31542742-S | EFHC2        | 11 | -0.102  | -0.00957 | -3.63 | 0.000300 | 0.00973  |
| GI_14211906-S | ZNF347       | 11 | -0.102  | -0.0161  | -3.63 | 0.000300 | 0.00974  |
| GI_4757845-S  | BCL9         | 11 | -0.102  | -0.0168  | -3.61 | 0.000313 | 0.0101   |
| Hs.135647-S   | RPP40        | 11 | -0.102  | -0.0152  | -3.61 | 0.000314 | 0.0101   |
| GI_4759059-I  | ZFYVE9       | 11 | -0.102  | -0.0154  | -3.61 | 0.000320 | 0.0103   |
| GI_33598967-S | LMO7         | 11 | -0.102  | -0.0157  | -3.60 | 0.000327 | 0.0105   |
| GI_34447228-S | STX16        | 11 | -0.102  | -0.00309 | -3.58 | 0.000351 | 0.0110   |
| hmm10299-S    | ---          | 11 | -0.101  | -0.0161  | -3.58 | 0.000355 | 0.0111   |
| GI_10938017-S | CCNB2        | 11 | -0.101  | -0.0126  | -3.58 | 0.000360 | 0.0112   |
| GI_18860901-S | PTPRK        | 11 | -0.101  | -0.0175  | -3.57 | 0.000376 | 0.0116   |
| GI_42660906-S | SYCE1L       | 11 | -0.100  | -0.00695 | -3.55 | 0.000404 | 0.0123   |
| GI_31341922-S | MB21D2       | 11 | 0.100   | 0.00865  | 3.55  | 0.000406 | 0.0123   |
| GI_27262656-I | ---          | 11 | -0.100  | -0.00544 | -3.54 | 0.000415 | 0.0125   |
| GI_34147389-S | TMEM121      | 11 | -0.100  | -0.0118  | -3.53 | 0.000430 | 0.0129   |
| Hs.445751-S   | ---          | 11 | -0.0992 | -0.0117  | -3.51 | 0.000466 | 0.0138   |
| Hs.205722-S   | ---          | 11 | -0.0984 | -0.00911 | -3.48 | 0.000520 | 0.0151   |
| GI_31317245-A | IL24         | 11 | -0.0981 | -0.0120  | -3.47 | 0.000537 | 0.0155   |
| GI_34916035-S | JAKMIP3      | 11 | 0.0980  | 0.0155   | 3.47  | 0.000544 | 0.0157   |
| GI_23308524-S | MORC2-AS1    | 11 | -0.0979 | -0.0104  | -3.46 | 0.000553 | 0.0159   |
| GI_6042201-A  | MME          | 11 | -0.0978 | -0.0149  | -3.46 | 0.000558 | 0.0160   |
| GI_24307904-S | SPON1        | 11 | -0.0977 | -0.0152  | -3.46 | 0.000565 | 0.0162   |
| GI_5730010-S  | RFPL2        | 11 | 0.0974  | 0.0134   | 3.45  | 0.000589 | 0.0167   |
| GI_21426832-S | RBM11        | 11 | -0.0965 | -0.0131  | -3.41 | 0.000661 | 0.0183   |
| GI_19913405-S | TOP2A        | 11 | -0.0960 | -0.0175  | -3.40 | 0.000705 | 0.0193   |
| Hs.146747-S   | ---          | 11 | 0.0959  | 0.0110   | 3.39  | 0.000715 | 0.0195   |
| Hs.474412-S   | ---          | 11 | -0.0958 | -0.0138  | -3.39 | 0.000726 | 0.0197   |
| GI_34147386-S | EFHD1        | 11 | -0.0958 | -0.0145  | -3.39 | 0.000729 | 0.0198   |
| GI_4504012-S  | GLDC         | 11 | -0.0957 | -0.0175  | -3.39 | 0.000732 | 0.0198   |
| GI_38455384-S | LAMP3        | 11 | -0.0957 | -0.0161  | -3.38 | 0.000734 | 0.0198   |
| GI_23397571-S | KLHL34       | 11 | -0.0956 | -0.0138  | -3.38 | 0.000744 | 0.0200   |

|               |            |    |         |          |       |          |          |
|---------------|------------|----|---------|----------|-------|----------|----------|
| GI_20514779-A | SPPL2B     | 11 | -0.0955 | -0.0145  | -3.38 | 0.000757 | 0.0203   |
| Hs.289587-S   | USP3-AS1   | 11 | -0.0951 | -0.0149  | -3.36 | 0.000791 | 0.0211   |
| GI_13435144-S | CLUAP1     | 11 | -0.0951 | -0.00849 | -3.36 | 0.000799 | 0.0213   |
| GI_38604072-S | C5orf42    | 11 | -0.0949 | -0.0128  | -3.36 | 0.000816 | 0.0216   |
| GI_5729898-S  | KLRAP1     | 11 | 0.0948  | 0.0111   | 3.35  | 0.000826 | 0.0218   |
| GI_28373095-S | ST8SIA1    | 11 | 0.0946  | 0.0136   | 3.35  | 0.000841 | 0.0221   |
| Hs.482647-S   | ---        | 11 | -0.0943 | -0.0159  | -3.34 | 0.000878 | 0.0228   |
| GI_4501912-S  | ADAM23     | 11 | 0.0943  | 0.0114   | 3.33  | 0.000881 | 0.0228   |
| GI_31341815-S | FLJ38379   | 11 | -0.0943 | -0.00627 | -3.33 | 0.000887 | 0.0230   |
| Hs.497310-S   | ---        | 11 | -0.0941 | -0.0110  | -3.33 | 0.000904 | 0.0233   |
| GI_34303922-S | TRMT10A    | 11 | -0.0939 | -0.0136  | -3.32 | 0.000921 | 0.0237   |
| GI_6677928-S  | SH3BGR     | 11 | -0.0939 | -0.0143  | -3.32 | 0.000925 | 0.0237   |
| GI_21361284-S | RCL1       | 11 | -0.0937 | -0.00697 | -3.31 | 0.000947 | 0.0242   |
| Hs.423319-S   | ---        | 11 | -0.0936 | -0.0119  | -3.31 | 0.000957 | 0.0244   |
| GI_31377724-S | ZNF462     | 11 | -0.0936 | -0.0110  | -3.31 | 0.000964 | 0.0246   |
| GI_33624847-I | SYNE2      | 11 | 0.0934  | 0.0137   | 3.30  | 0.000983 | 0.0249   |
| GI_24308068-S | ZNF521     | 11 | -0.0934 | -0.0105  | -3.30 | 0.000989 | 0.0250   |
| GI_27499706-S | FGF14-AS2  | 11 | -0.0924 | -0.0121  | -3.27 | 0.001121 | 0.0276   |
| Hs.483398-S   | ---        | 11 | -0.0923 | -0.00780 | -3.26 | 0.001135 | 0.0279   |
| GI_10518496-S | DLL1       | 11 | -0.0920 | -0.00799 | -3.25 | 0.001178 | 0.0287   |
| GI_31377649-S | TMEM25     | 11 | -0.0919 | -0.0140  | -3.25 | 0.001183 | 0.0288   |
| GI_42656192-S | ---        | 11 | -0.0918 | -0.0172  | -3.25 | 0.001198 | 0.0291   |
| GI_5730105-S  | CXCR6      | 11 | -0.0912 | -0.0118  | -3.22 | 0.001300 | 0.0309   |
| GI_16554580-S | COL5A2     | 11 | -0.0910 | -0.0137  | -3.22 | 0.001322 | 0.0312   |
| GI_9845497-S  | LAMC1      | 11 | -0.0909 | -0.00979 | -3.21 | 0.001340 | 0.0316   |
| GI_20336252-I | ---        | 11 | -0.0908 | -0.00644 | -3.21 | 0.001360 | 0.0320   |
| GI_15890083-S | COL4A4     | 11 | -0.0905 | -0.0129  | -3.20 | 0.001415 | 0.0330   |
| hmm3484-S     | SNHG10     | 11 | -0.0905 | -0.00399 | -3.19 | 0.001434 | 0.0334   |
| GI_10346128-S | DDX43      | 11 | -0.0902 | -0.0156  | -3.19 | 0.001468 | 0.0340   |
| GI_24308377-S | TUBGCP5    | 11 | -0.0900 | -0.0142  | -3.18 | 0.001505 | 0.0347   |
| GI_19923649-S | ZNF607     | 11 | -0.0898 | -0.00510 | -3.17 | 0.001543 | 0.0354   |
| GI_44680155-S | ALG10      | 11 | -0.0896 | -0.0140  | -3.17 | 0.001577 | 0.0360   |
| GI_4503602-S  | ESR1       | 11 | -0.0895 | -0.0131  | -3.17 | 0.001586 | 0.0362   |
| GI_42661099-S | TMEM220    | 11 | -0.0894 | -0.00879 | -3.16 | 0.001610 | 0.0366   |
| GI_22538425-A | TRAF3IP2   | 11 | -0.0893 | -0.00477 | -3.15 | 0.001652 | 0.0374   |
| Hs.495177-S   | ---        | 11 | -0.0890 | -0.00502 | -3.14 | 0.001707 | 0.0383   |
| GI_29540546-A | TRO        | 11 | -0.0889 | -0.0150  | -3.14 | 0.001711 | 0.0384   |
| GI_7657336-S  | MLH3       | 11 | -0.0887 | -0.0125  | -3.13 | 0.001760 | 0.0393   |
| GI_14249703-S | RERG       | 11 | -0.0886 | -0.00786 | -3.13 | 0.001772 | 0.0395   |
| GI_42657343-S | ---        | 11 | -0.0886 | -0.0113  | -3.13 | 0.001773 | 0.0395   |
| GI_37550176-S | ZNF608     | 11 | -0.0886 | -0.0139  | -3.13 | 0.001785 | 0.0396   |
| GI_18491007-S | CYP2J2     | 11 | -0.0886 | -0.0135  | -3.13 | 0.001788 | 0.0397   |
| GI_45238856-S | ---        | 11 | -0.0885 | -0.0131  | -3.13 | 0.001793 | 0.0397   |
| GI_35493986-I | UBE2I      | 11 | -0.0883 | -0.00955 | -3.12 | 0.001838 | 0.0406   |
| GI_29294636-A | MEST       | 11 | -0.0882 | -0.0114  | -3.12 | 0.001869 | 0.0411   |
| hmm28640-S    | PLEKHM3    | 11 | -0.0882 | -0.0137  | -3.12 | 0.001871 | 0.0411   |
| Hs.469464-S   | ---        | 11 | -0.0881 | -0.00690 | -3.11 | 0.001889 | 0.0414   |
| Hs.448493-S   | ---        | 11 | -0.0881 | -0.0140  | -3.11 | 0.001895 | 0.0415   |
| GI_4505896-S  | PLS1       | 11 | -0.0880 | -0.0134  | -3.11 | 0.001908 | 0.0417   |
| GI_37547050-S | ZSWIM5     | 11 | 0.0878  | 0.0124   | 3.10  | 0.001969 | 0.0428   |
| GI_37559987-S | ---        | 11 | -0.0877 | -0.0140  | -3.10 | 0.001986 | 0.0431   |
| Hs.427578-S   | ---        | 11 | -0.0877 | -0.0128  | -3.10 | 0.001988 | 0.0431   |
| GI_4557694-S  | KIT        | 11 | -0.0869 | -0.0132  | -3.07 | 0.002176 | 0.0462   |
| GI_38348259-S | KANK3      | 11 | -0.0867 | -0.00679 | -3.06 | 0.002232 | 0.0471   |
| Hs.444093-S   | DBT        | 11 | -0.0865 | -0.0139  | -3.06 | 0.002293 | 0.0481   |
| GI_39725694-S | CRIP1      | 12 | 0.232   | 0.00997  | 8.39  | 1.33E-16 | 7.51E-14 |
| GI_4504374-S  | CFH        | 12 | 0.226   | 0.0298   | 8.18  | 6.78E-16 | 3.52E-13 |
| GI_18375640-S | BATF       | 12 | 0.202   | 0.00682  | 7.24  | 7.87E-13 | 2.30E-10 |
| GI_38016201-S | SATB2      | 12 | 0.199   | 0.0305   | 7.15  | 1.52E-12 | 4.04E-10 |
| GI_16418432-S | ALPK2      | 12 | 0.196   | 0.0260   | 7.03  | 3.39E-12 | 8.44E-10 |
| Hs.408284-S   | ZBTB20-AS1 | 12 | 0.193   | 0.0132   | 6.93  | 6.53E-12 | 1.56E-09 |
| GI_36054181-S | REG4       | 12 | -0.184  | -0.0157  | -6.59 | 6.37E-11 | 1.23E-08 |
| GI_4501882-S  | ACTA2      | 12 | 0.180   | 0.00720  | 6.43  | 1.80E-10 | 3.20E-08 |
| GI_37555873-S | ---        | 12 | -0.158  | -0.00498 | -5.63 | 2.23E-08 | 2.51E-06 |
| GI_24497541-S | HOXC5      | 12 | 0.156   | 0.0212   | 5.56  | 3.30E-08 | 3.61E-06 |
| GI_13376815-S | CXXC4      | 12 | 0.154   | 0.0167   | 5.50  | 4.63E-08 | 4.91E-06 |
| GI_37595568-S | CLEC11A    | 12 | -0.151  | -0.00540 | -5.37 | 9.27E-08 | 9.25E-06 |
| GI_12621915-S | ---        | 12 | 0.150   | 0.0309   | 5.32  | 1.20E-07 | 1.16E-05 |
| GI_4504216-S  | GUCY2D     | 12 | -0.149  | -0.0111  | -5.31 | 1.28E-07 | 1.21E-05 |
| GI_31542985-S | ITLN1      | 12 | 0.147   | 0.0118   | 5.22  | 2.13E-07 | 1.95E-05 |
| GI_10092600-S | EIF4G3     | 12 | 0.146   | 0.00299  | 5.15  | 3.09E-07 | 2.71E-05 |
| GI_11545796-A | FAM129A    | 12 | 0.144   | 0.00466  | 5.12  | 3.45E-07 | 2.99E-05 |
| Hs.203743-S   | ---        | 12 | -0.144  | -0.0146  | -5.10 | 3.83E-07 | 3.27E-05 |
| GI_31341099-S | RNF207     | 12 | 0.141   | 0.00727  | 4.99  | 6.77E-07 | 5.43E-05 |
| Hs.483737-S   | ---        | 12 | 0.140   | 0.0206   | 4.96  | 8.01E-07 | 6.27E-05 |
| GI_4505948-S  | POMC       | 12 | -0.139  | -0.00542 | -4.93 | 9.26E-07 | 7.15E-05 |
| GI_24119161-S | CD70       | 12 | 0.138   | 0.0176   | 4.91  | 1.02E-06 | 7.75E-05 |
| GI_10835156-S | IGFBP2     | 12 | 0.138   | 0.0225   | 4.91  | 1.06E-06 | 7.99E-05 |
| GI_21361999-S | TNIP3      | 12 | 0.136   | 0.00820  | 4.85  | 1.42E-06 | 0.000103 |
| GI_27499434-S | PPFIBP2    | 12 | -0.136  | -0.00343 | -4.83 | 1.55E-06 | 0.000109 |
| GI_19923620-S | HSD3B7     | 12 | 0.130   | 0.0189   | 4.63  | 4.01E-06 | 0.000256 |
| GI_37552339-S | KDM4B      | 12 | -0.130  | -0.00242 | -4.59 | 4.79E-06 | 0.000299 |
| GI_31543399-S | PIAS3      | 12 | 0.129   | 0.00287  | 4.55  | 5.91E-06 | 0.000361 |
| GI_32967310-S | EPHA2      | 12 | -0.128  | -0.00632 | -4.54 | 6.05E-06 | 0.000368 |
| GI_40316916-S | PCSK4      | 12 | -0.126  | -0.0189  | -4.47 | 8.45E-06 | 0.000502 |
| GI_34222372-S | SPNS3      | 12 | -0.125  | -0.00506 | -4.42 | 1.08E-05 | 0.000622 |
| GI_27363487-S | C1QC       | 12 | 0.122   | 0.0203   | 4.34  | 1.51E-05 | 0.000829 |

|               |                     |    |         |          |       |          |          |
|---------------|---------------------|----|---------|----------|-------|----------|----------|
| hmm30425-S    | ---                 | 12 | -0.122  | -0.0176  | -4.31 | 1.76E-05 | 0.000942 |
| Gl_31377717-S | <b>GREM2</b>        | 12 | 0.120   | 0.0182   | 4.27  | 2.13E-05 | 0.00111  |
| Gl_35038563-S | <b>KIAA0922</b>     | 12 | -0.121  | -0.00249 | -4.27 | 2.15E-05 | 0.00111  |
| Gl_29171761-S | <b>GSC</b>          | 12 | 0.120   | 0.0188   | 4.26  | 2.21E-05 | 0.00114  |
| hmm18872-S    | ---                 | 12 | 0.118   | 0.0107   | 4.19  | 3.01E-05 | 0.00146  |
| Gl_24430211-S | <b>IL23R</b>        | 12 | -0.117  | -0.0153  | -4.16 | 3.33E-05 | 0.00159  |
| Hs.473110-S   | ---                 | 12 | 0.118   | 0.00809  | 4.16  | 3.33E-05 | 0.00159  |
| Gl_34147619-S | <b>EHD4</b>         | 12 | 0.118   | 0.00234  | 4.14  | 3.71E-05 | 0.00173  |
| Gl_38027945-S | <b>COPS6</b>        | 12 | 0.118   | 0.00186  | 4.13  | 3.83E-05 | 0.00178  |
| Gl_22208962-S | <b>ASB2</b>         | 12 | 0.116   | 0.00667  | 4.11  | 4.25E-05 | 0.00194  |
| hmm26735-S    | <b>SOGA1</b>        | 12 | -0.116  | -0.00880 | -4.10 | 4.41E-05 | 0.00200  |
| Hs.464549-S   | ---                 | 12 | 0.115   | 0.0135   | 4.08  | 4.74E-05 | 0.00213  |
| Gl_12545403-S | <b>ICAM5</b>        | 12 | 0.115   | 0.00510  | 4.07  | 5.09E-05 | 0.00225  |
| Gl_5729809-S  | <b>EBP</b>          | 12 | 0.113   | 0.00469  | 4.01  | 6.53E-05 | 0.00279  |
| Gl_30148676-S | <b>FAR2P3</b>       | 12 | 0.113   | 0.0163   | 4.00  | 6.77E-05 | 0.00288  |
| Gl_34303933-S | <b>C19orf18</b>     | 12 | -0.113  | -0.00793 | -3.99 | 7.13E-05 | 0.00299  |
| Gl_10567815-I | <b>GNAO1</b>        | 12 | 0.112   | 0.0129   | 3.98  | 7.27E-05 | 0.00303  |
| Gl_37538413-S | <b>MYO1G</b>        | 12 | 0.112   | 0.00460  | 3.97  | 7.57E-05 | 0.00314  |
| Hs.520721-S   | ---                 | 12 | 0.112   | 0.0167   | 3.96  | 8.04E-05 | 0.00330  |
| Gl_4505042-S  | <b>LTF</b>          | 12 | 0.111   | 0.0268   | 3.94  | 8.63E-05 | 0.00350  |
| Gl_19224662-S | <b>TCEAL2</b>       | 12 | 0.111   | 0.0131   | 3.93  | 8.98E-05 | 0.00362  |
| Gl_31341724-S | <b>C1orf110</b>     | 12 | 0.111   | 0.0166   | 3.93  | 9.04E-05 | 0.00364  |
| Gl_5016087-S  | <b>ACTA1</b>        | 12 | 0.110   | 0.0133   | 3.90  | 0.000101 | 0.00398  |
| Gl_37546892-S | <b>PKDCC</b>        | 12 | -0.109  | -0.0102  | -3.88 | 0.000111 | 0.00429  |
| Gl_45007001-S | <b>CERS6</b>        | 12 | -0.109  | -0.00406 | -3.87 | 0.000114 | 0.00439  |
| Gl_44917611-S | <b>KIF1C</b>        | 12 | 0.109   | 0.00419  | 3.87  | 0.000117 | 0.00446  |
| Gl_42822890-S | <b>MIEN1</b>        | 12 | 0.110   | 0.00224  | 3.86  | 0.000120 | 0.00456  |
| Gl_4503752-I  | <b>FLT4</b>         | 12 | -0.109  | -0.00287 | -3.83 | 0.000135 | 0.00505  |
| Gl_24308353-S | <b>C16orf45</b>     | 12 | 0.108   | 0.00391  | 3.82  | 0.000140 | 0.00518  |
| Gl_4503954-S  | <b>BLOC1S1</b>      | 12 | 0.108   | 0.00296  | 3.81  | 0.000144 | 0.00533  |
| Hs.493281-S   | ---                 | 12 | -0.108  | -0.00906 | -3.81 | 0.000145 | 0.00538  |
| hmm24546-S    | <b>PRSS57</b>       | 12 | 0.107   | 0.0179   | 3.80  | 0.000153 | 0.00558  |
| Hs.501419-S   | ---                 | 12 | -0.107  | -0.0118  | -3.79 | 0.000155 | 0.00566  |
| Gl_24497529-I | ---                 | 12 | 0.107   | 0.00440  | 3.78  | 0.000162 | 0.00584  |
| Gl_21704278-A | <b>JAG2</b>         | 12 | 0.106   | 0.0173   | 3.75  | 0.000184 | 0.00653  |
| Hs.511682-S   | ---                 | 12 | 0.106   | 0.0114   | 3.75  | 0.000185 | 0.00655  |
| Gl_40288196-S | <b>GATA6</b>        | 12 | 0.106   | 0.0151   | 3.74  | 0.000196 | 0.00687  |
| Gl_37540292-S | <b>FAM221B</b>      | 12 | -0.105  | -0.0114  | -3.73 | 0.000197 | 0.00689  |
| Gl_4507686-S  | <b>TRPC3</b>        | 12 | 0.105   | 0.00654  | 3.73  | 0.000199 | 0.00694  |
| hmm21427-S    | ---                 | 12 | 0.105   | 0.0140   | 3.70  | 0.000222 | 0.00760  |
| Gl_19743853-A | <b>DCN</b>          | 12 | -0.104  | -0.0133  | -3.70 | 0.000229 | 0.00780  |
| Gl_8922406-S  | <b>FIGN</b>         | 12 | -0.104  | -0.0148  | -3.67 | 0.000251 | 0.00845  |
| Gl_4504542-S  | <b>HTR3A</b>        | 12 | -0.104  | -0.0133  | -3.67 | 0.000252 | 0.00847  |
| hmm20063-S    | ---                 | 12 | 0.104   | 0.0101   | 3.67  | 0.000254 | 0.00852  |
| Gl_31543182-S | ---                 | 12 | -0.103  | -0.0154  | -3.64 | 0.000287 | 0.00937  |
| Gl_37537711-S | <b>EPB41L4A</b>     | 12 | 0.102   | 0.0128   | 3.61  | 0.000317 | 0.0102   |
| Gl_38093656-S | <b>GPRIN3</b>       | 12 | 0.102   | 0.00346  | 3.61  | 0.000322 | 0.0103   |
| Gl_29746633-S | <b>SLC35E4</b>      | 12 | 0.102   | 0.00633  | 3.60  | 0.000331 | 0.0106   |
| hmm19284-S    | ---                 | 12 | -0.101  | -0.0144  | -3.59 | 0.000348 | 0.0110   |
| Hs.463395-S   | ---                 | 12 | 0.101   | 0.0137   | 3.58  | 0.000351 | 0.0110   |
| Hs.368200-S   | ---                 | 12 | 0.101   | 0.0133   | 3.57  | 0.000368 | 0.0114   |
| Gl_7662177-S  | ---                 | 12 | 0.101   | 0.00595  | 3.57  | 0.000369 | 0.0114   |
| Hs.276341-S   | ---                 | 12 | -0.101  | -0.00838 | -3.57 | 0.000375 | 0.0116   |
| Gl_38176293-S | <b>ANKDD1A</b>      | 12 | 0.101   | 0.00621  | 3.57  | 0.000376 | 0.0116   |
| Gl_27498471-S | <b>ZSCAN23</b>      | 12 | 0.101   | 0.00565  | 3.56  | 0.000388 | 0.0119   |
| hmm34835-S    | ---                 | 12 | -0.100  | -0.0126  | -3.53 | 0.000426 | 0.0128   |
| hmm4390-S     | ---                 | 12 | 0.100   | 0.0146   | 3.52  | 0.000439 | 0.0131   |
| Gl_7662101-S  | <b>LRRTM2</b>       | 12 | -0.0994 | -0.0150  | -3.52 | 0.000451 | 0.0134   |
| Gl_27436900-S | <b>MRPL12</b>       | 12 | -0.0995 | -0.00209 | -3.50 | 0.000483 | 0.0142   |
| Gl_27482674-S | <b>PROSER2-AS1</b>  | 12 | 0.0989  | 0.00774  | 3.50  | 0.000485 | 0.0142   |
| Hs.519917-S   | ---                 | 12 | 0.0990  | 0.00440  | 3.50  | 0.000487 | 0.0142   |
| Hs.503601-S   | ---                 | 12 | 0.0987  | 0.0174   | 3.49  | 0.000496 | 0.0145   |
| Gl_42476154-S | <b>PTMS</b>         | 12 | 0.0989  | 0.00369  | 3.49  | 0.000498 | 0.0145   |
| hmm24798-S    | ---                 | 12 | 0.0984  | 0.0150   | 3.48  | 0.000513 | 0.0149   |
| Gl_20535873-S | ---                 | 12 | 0.0984  | 0.0140   | 3.48  | 0.000519 | 0.0151   |
| Gl_42658224-S | <b>VWDE</b>         | 12 | 0.0978  | 0.0135   | 3.46  | 0.000559 | 0.0160   |
| Hs.58509-S    | <b>LOC100506388</b> | 12 | -0.0977 | -0.0148  | -3.46 | 0.000565 | 0.0162   |
| Gl_20536598-S | <b>LOC100506405</b> | 12 | -0.0975 | -0.0147  | -3.45 | 0.000584 | 0.0166   |
| Gl_31982944-S | <b>SLC5A10</b>      | 12 | 0.0973  | 0.0111   | 3.44  | 0.000597 | 0.0169   |
| Hs.469893-S   | ---                 | 12 | 0.0972  | 0.0129   | 3.44  | 0.000602 | 0.0169   |
| Gl_37563645-S | <b>MIAT</b>         | 12 | 0.0972  | 0.0106   | 3.44  | 0.000602 | 0.0169   |
| Gl_21327676-S | <b>HLA-B</b>        | 12 | 0.0975  | 0.00320  | 3.44  | 0.000602 | 0.0169   |
| Gl_21166383-A | <b>HEPH</b>         | 12 | 0.0972  | 0.00599  | 3.44  | 0.000612 | 0.0172   |
| hmm19899-S    | ---                 | 12 | 0.0979  | 0.00168  | 3.43  | 0.000616 | 0.0173   |
| Gl_7669552-S  | <b>VCP</b>          | 12 | 0.0979  | 0.00143  | 3.42  | 0.000641 | 0.0179   |
| Gl_42476034-S | <b>FAM20A</b>       | 12 | 0.0966  | 0.0149   | 3.42  | 0.000657 | 0.0182   |
| Gl_42659240-S | <b>SNX30</b>        | 12 | 0.0965  | 0.0157   | 3.41  | 0.000662 | 0.0183   |
| Gl_42476062-S | <b>PXDC1</b>        | 12 | 0.0964  | 0.00877  | 3.41  | 0.000669 | 0.0185   |
| Hs.374128-S   | ---                 | 12 | 0.0964  | 0.00947  | 3.41  | 0.000674 | 0.0185   |
| Hs.484809-S   | ---                 | 12 | -0.0963 | -0.0118  | -3.41 | 0.000680 | 0.0187   |
| Gl_21361986-A | <b>TMTCT1</b>       | 12 | 0.0963  | 0.0146   | 3.41  | 0.000680 | 0.0187   |
| Gl_4505840-S  | <b>PKP1</b>         | 12 | 0.0962  | 0.0158   | 3.40  | 0.000687 | 0.0188   |
| Gl_22749242-S | <b>C1orf177</b>     | 12 | 0.0962  | 0.0103   | 3.40  | 0.000689 | 0.0189   |
| Hs.492837-S   | ---                 | 12 | 0.0958  | 0.0113   | 3.39  | 0.000721 | 0.0196   |
| Gl_9845523-S  | <b>EGR2</b>         | 12 | 0.0958  | 0.00953  | 3.39  | 0.000729 | 0.0198   |
| Gl_11119429-S | <b>TSKS</b>         | 12 | -0.0957 | -0.0144  | -3.39 | 0.000730 | 0.0198   |
| Hs.454935-S   | ---                 | 12 | 0.0958  | 0.00498  | 3.39  | 0.000731 | 0.0198   |

|               |              |    |         |          |       |          |        |
|---------------|--------------|----|---------|----------|-------|----------|--------|
| Hs.444774-S   | ---          | 12 | 0.0956  | 0.00700  | 3.38  | 0.000743 | 0.0200 |
| Gl_37574713-S | CAMSAP3      | 12 | -0.0950 | -0.00853 | -3.36 | 0.000801 | 0.0213 |
| hmm34749-S    | ---          | 12 | 0.0950  | 0.00771  | 3.36  | 0.000805 | 0.0213 |
| Gl_21536459-S | MAP3K5       | 12 | 0.0949  | 0.00283  | 3.35  | 0.000838 | 0.0220 |
| Gl_42656660-S | ---          | 12 | -0.0948 | -0.00452 | -3.35 | 0.000839 | 0.0220 |
| Gl_38679925-S | CERCAM       | 12 | 0.0946  | 0.00979  | 3.35  | 0.000847 | 0.0222 |
| Gl_27894286-A | PHF7         | 12 | 0.0946  | 0.00487  | 3.34  | 0.000849 | 0.0222 |
| Gl_15451871-S | B3GALT2      | 12 | -0.0944 | -0.0130  | -3.34 | 0.000865 | 0.0225 |
| Hs.507256-S   | ---          | 12 | 0.0944  | 0.0147   | 3.34  | 0.000869 | 0.0226 |
| Gl_29788761-S | DNTT         | 12 | -0.0942 | -0.0125  | -3.33 | 0.000887 | 0.0230 |
| Hs.378091-S   | ---          | 12 | 0.0942  | 0.0151   | 3.33  | 0.000893 | 0.0231 |
| Gl_37552466-S | ---          | 12 | 0.0942  | 0.0156   | 3.33  | 0.000894 | 0.0231 |
| Gl_12621916-S | ---          | 12 | 0.0939  | 0.0169   | 3.32  | 0.000921 | 0.0237 |
| Gl_36054149-S | RIMS4        | 12 | 0.0939  | 0.0123   | 3.32  | 0.000924 | 0.0237 |
| Gl_23199981-S | RNF112       | 12 | 0.0938  | 0.00393  | 3.31  | 0.000955 | 0.0244 |
| Gl_19923712-A | BNIP1        | 12 | -0.0934 | -0.00477 | -3.30 | 0.000991 | 0.0250 |
| Gl_40789088-S | NTAN1        | 12 | 0.0935  | 0.00306  | 3.30  | 0.001002 | 0.0253 |
| Hs.498522-S   | ---          | 12 | -0.0932 | -0.0122  | -3.30 | 0.001004 | 0.0253 |
| Hs.482834-S   | ---          | 12 | 0.0932  | 0.0139   | 3.29  | 0.001013 | 0.0255 |
| Gl_37539105-S | MGC72080     | 12 | -0.0937 | -0.00196 | -3.29 | 0.001015 | 0.0255 |
| Gl_18490994-A | MRV11        | 12 | 0.0930  | 0.0117   | 3.29  | 0.001040 | 0.0260 |
| Hs.463570-S   | ---          | 12 | 0.0930  | 0.0104   | 3.29  | 0.001042 | 0.0261 |
| Hs.83346-S    | ---          | 12 | -0.0929 | -0.00971 | -3.28 | 0.001050 | 0.0262 |
| Gl_5031882-S  | LOXL1        | 12 | 0.0928  | 0.0124   | 3.28  | 0.001061 | 0.0264 |
| Gl_10518505-A | F8           | 12 | 0.0922  | 0.00691  | 3.26  | 0.001150 | 0.0282 |
| Gl_34916041-S | ESPNL        | 12 | -0.0921 | -0.0126  | -3.26 | 0.001156 | 0.0283 |
| Gl_29568104-S | ---          | 12 | -0.0921 | -0.00585 | -3.25 | 0.001172 | 0.0286 |
| Gl_13569896-S | SHCBP1L      | 12 | 0.0919  | 0.0140   | 3.25  | 0.001192 | 0.0289 |
| Gl_27734902-S | ZNF584       | 12 | -0.0917 | -0.0143  | -3.24 | 0.001220 | 0.0294 |
| Hs.475556-S   | ---          | 12 | -0.0917 | -0.00715 | -3.24 | 0.001224 | 0.0295 |
| Gl_28916690-A | MUC1         | 12 | 0.0916  | 0.0132   | 3.24  | 0.001228 | 0.0296 |
| Gl_23238209-A | ARPC2        | 12 | 0.0921  | 0.00177  | 3.23  | 0.001251 | 0.0300 |
| Hs.445547-S   | ---          | 12 | 0.0915  | 0.00859  | 3.23  | 0.001252 | 0.0300 |
| Gl_39725713-S | ALG3         | 12 | -0.0916 | -0.00290 | -3.23 | 0.001262 | 0.0302 |
| hmm22123-S    | ---          | 12 | -0.0914 | -0.0111  | -3.23 | 0.001270 | 0.0303 |
| Hs.385594-S   | ---          | 12 | -0.0913 | -0.0142  | -3.23 | 0.001273 | 0.0304 |
| Hs.220971-S   | ---          | 12 | 0.0912  | 0.00613  | 3.22  | 0.001300 | 0.0309 |
| hmm33438-S    | ---          | 12 | -0.0911 | -0.00901 | -3.22 | 0.001309 | 0.0310 |
| hmm30955-S    | ---          | 12 | 0.0908  | 0.00416  | 3.21  | 0.001373 | 0.0322 |
| hmm36387-S    | ---          | 12 | -0.0907 | -0.00903 | -3.21 | 0.001377 | 0.0323 |
| Gl_16306540-S | CDH9         | 12 | 0.0907  | 0.00719  | 3.21  | 0.001377 | 0.0323 |
| Hs.490862-S   | ---          | 12 | 0.0905  | 0.00885  | 3.20  | 0.001418 | 0.0331 |
| Gl_15011976-S | ARHGEF16     | 12 | 0.0904  | 0.0124   | 3.20  | 0.001433 | 0.0333 |
| Gl_41208742-S | BLOC1S3      | 12 | -0.0904 | -0.0144  | -3.19 | 0.001437 | 0.0334 |
| Hs.514920-S   | ---          | 12 | 0.0903  | 0.00475  | 3.19  | 0.001457 | 0.0338 |
| hmm20684-S    | SLC22A20     | 12 | 0.0900  | 0.0108   | 3.18  | 0.001503 | 0.0347 |
| Gl_13376565-S | C3orf36      | 12 | 0.0900  | 0.0118   | 3.18  | 0.001506 | 0.0347 |
| Gl_42662756-S | ---          | 12 | 0.0898  | 0.0136   | 3.17  | 0.001545 | 0.0354 |
| Hs.459502-S   | ---          | 12 | 0.0897  | 0.0114   | 3.17  | 0.001553 | 0.0355 |
| Gl_23957699-S | ZNF114       | 12 | -0.0896 | -0.00842 | -3.17 | 0.001576 | 0.0360 |
| Gl_4557632-S  | GRID2        | 12 | -0.0894 | -0.0139  | -3.16 | 0.001608 | 0.0366 |
| Gl_39777598-I | TGM2         | 12 | 0.0893  | 0.0106   | 3.16  | 0.001630 | 0.0370 |
| Hs.152466-S   | ---          | 12 | 0.0893  | 0.00647  | 3.15  | 0.001649 | 0.0374 |
| Gl_37548655-S | OLFML2B      | 12 | 0.0893  | 0.00558  | 3.15  | 0.001652 | 0.0374 |
| Gl_23503296-S | PRSS35       | 12 | -0.0892 | -0.0104  | -3.15 | 0.001656 | 0.0375 |
| Gl_42657574-S | C6orf52      | 12 | -0.0893 | -0.00371 | -3.15 | 0.001663 | 0.0375 |
| Gl_27478827-S | ---          | 12 | 0.0892  | 0.0133   | 3.15  | 0.001662 | 0.0375 |
| Gl_34147486-A | POFUT2       | 12 | 0.0895  | 0.00211  | 3.15  | 0.001680 | 0.0379 |
| Gl_41222692-S | ---          | 12 | 0.0888  | 0.0140   | 3.14  | 0.001741 | 0.0390 |
| Hs.525142-S   | ---          | 12 | 0.0888  | 0.0135   | 3.14  | 0.001743 | 0.0390 |
| Gl_9257200-S  | CALY         | 12 | 0.0888  | 0.00790  | 3.14  | 0.001742 | 0.0390 |
| Gl_37546156-S | GLOD5        | 12 | 0.0888  | 0.0136   | 3.14  | 0.001745 | 0.0390 |
| Gl_34222229-S | FAM163A      | 12 | -0.0887 | -0.0129  | -3.13 | 0.001761 | 0.0393 |
| Gl_27484966-S | ---          | 12 | 0.0887  | 0.0136   | 3.13  | 0.001765 | 0.0393 |
| Gl_21314673-S | ERRFI1       | 12 | 0.0887  | 0.00359  | 3.13  | 0.001784 | 0.0396 |
| Gl_29550920-I | ---          | 12 | 0.0886  | 0.00415  | 3.13  | 0.001792 | 0.0397 |
| Gl_29734567-S | ---          | 12 | 0.0883  | 0.0121   | 3.12  | 0.001841 | 0.0406 |
| Gl_13376049-S | BMP8A        | 12 | -0.0881 | -0.0107  | -3.11 | 0.001884 | 0.0414 |
| Gl_34222307-S | TPBG         | 12 | 0.0881  | 0.0135   | 3.11  | 0.001899 | 0.0416 |
| Hs.127491-S   | ---          | 12 | 0.0879  | 0.0102   | 3.11  | 0.001935 | 0.0422 |
| Hs.473220-S   | ---          | 12 | 0.0879  | 0.0100   | 3.11  | 0.001935 | 0.0422 |
| Gl_38327641-S | WDR55        | 12 | 0.0885  | 0.00167  | 3.11  | 0.001934 | 0.0422 |
| Gl_13129141-S | DHX58        | 12 | -0.0882 | -0.00194 | -3.10 | 0.001962 | 0.0427 |
| Gl_21450823-S | DACT3        | 12 | -0.0878 | -0.00810 | -3.10 | 0.001964 | 0.0427 |
| Gl_42734318-S | DCLRE1A      | 12 | 0.0878  | 0.00308  | 3.10  | 0.001993 | 0.0432 |
| Hs.310697-S   | ---          | 12 | 0.0877  | 0.00679  | 3.10  | 0.001995 | 0.0432 |
| Gl_29743461-S | ---          | 12 | 0.0875  | 0.00866  | 3.09  | 0.002031 | 0.0439 |
| hmm19462-S    | ---          | 12 | 0.0874  | 0.00896  | 3.09  | 0.002057 | 0.0443 |
| Gl_5453709-S  | LASP1        | 12 | 0.0877  | 0.00231  | 3.09  | 0.002068 | 0.0445 |
| Gl_40255082-S | SPTSSB       | 12 | -0.0874 | -0.00420 | -3.09 | 0.002073 | 0.0446 |
| Hs.81889-S    | ---          | 12 | 0.0873  | 0.0121   | 3.08  | 0.002088 | 0.0448 |
| Gl_40254477-S | SLC1A2       | 12 | 0.0873  | 0.00581  | 3.08  | 0.002095 | 0.0449 |
| Gl_29747632-S | ---          | 12 | 0.0872  | 0.00865  | 3.08  | 0.002114 | 0.0452 |
| hmm23603-S    | ---          | 12 | -0.0871 | -0.0110  | -3.08 | 0.002122 | 0.0453 |
| Gl_17402913-A | WNT16        | 12 | 0.0872  | 0.00415  | 3.08  | 0.002126 | 0.0454 |
| Gl_27477711-S | LOC100505685 | 12 | 0.0871  | 0.00433  | 3.08  | 0.002145 | 0.0457 |
| Hs.270801-S   | ---          | 12 | 0.0869  | 0.00899  | 3.07  | 0.002179 | 0.0463 |

|               |           |    |         |          |       |          |          |
|---------------|-----------|----|---------|----------|-------|----------|----------|
| hmm21666-S    | ---       | 12 | -0.0869 | -0.00823 | -3.07 | 0.002180 | 0.0463   |
| Gl_15208653-S | DGCR6     | 12 | 0.0871  | 0.00273  | 3.07  | 0.002185 | 0.0463   |
| Hs.500574-S   | ---       | 12 | -0.0868 | -0.00839 | -3.07 | 0.002202 | 0.0466   |
| Hs.396516-S   | ---       | 12 | -0.0867 | -0.0111  | -3.07 | 0.002221 | 0.0469   |
| hmm25481-S    | ---       | 12 | -0.0868 | -0.00482 | -3.07 | 0.002223 | 0.0470   |
| Gl_18379345-S | SORCS3    | 12 | 0.0867  | 0.0126   | 3.06  | 0.002232 | 0.0471   |
| Gl_20482378-S | OR5B21    | 12 | -0.0867 | -0.0124  | -3.06 | 0.002242 | 0.0473   |
| Hs.373509-S   | ---       | 12 | 0.0866  | 0.0130   | 3.06  | 0.002253 | 0.0475   |
| Gl_18201908-A | VCAM1     | 12 | 0.0864  | 0.0139   | 3.05  | 0.002311 | 0.0484   |
| Hs.490304-S   | ---       | 12 | 0.0863  | 0.0129   | 3.05  | 0.002334 | 0.0487   |
| Gl_31543061-S | TMEM45B   | 12 | 0.0863  | 0.00968  | 3.05  | 0.002354 | 0.0490   |
| Gl_11496969-S | ADH7      | 12 | -0.0863 | -0.00584 | -3.05 | 0.002363 | 0.0492   |
| Hs.127566-S   | ---       | 12 | 0.0862  | 0.0119   | 3.05  | 0.002369 | 0.0493   |
| Gl_20143915-I | TTN       | 12 | -0.0862 | -0.0126  | -3.04 | 0.002379 | 0.0494   |
| Gl_9910361-S  | SEMA3G    | 12 | 0.0862  | 0.0120   | 3.04  | 0.002378 | 0.0494   |
| Gl_19923110-S | IGFBP3    | 13 | 0.399   | 0.0370   | 15.3  | 9.89E-49 | 2.34E-44 |
| Gl_31377588-S | SYT11     | 13 | 0.361   | 0.0112   | 13.6  | 2.73E-39 | 2.58E-35 |
| Gl_5032234-S  | RCAN2     | 13 | 0.351   | 0.0623   | 13.2  | 2.77E-37 | 1.87E-33 |
| Gl_21389504-S | JAKMIP1   | 13 | 0.311   | 0.0228   | 11.5  | 3.90E-29 | 1.42E-25 |
| Gl_5360215-I  | IDS       | 13 | 0.298   | 0.00652  | 10.9  | 1.11E-26 | 2.77E-23 |
| Hs.355618-S   | MIAT      | 13 | 0.294   | 0.0143   | 10.8  | 3.81E-26 | 8.58E-23 |
| Gl_41149833-S | LINC00944 | 13 | 0.286   | 0.0141   | 10.5  | 9.21E-25 | 1.61E-21 |
| Gl_38348363-S | MXRA7     | 13 | 0.274   | 0.0148   | 10.0  | 9.26E-23 | 1.25E-19 |
| Gl_15718681-S | LAG3      | 13 | 0.271   | 0.0174   | 9.90  | 2.81E-22 | 3.41E-19 |
| Gl_31543092-S | GLB1L2    | 13 | 0.266   | 0.0150   | 9.72  | 1.41E-21 | 1.56E-18 |
| Gl_6996017-S  | MSC       | 13 | 0.264   | 0.0205   | 9.63  | 3.25E-21 | 3.33E-18 |
| Gl_38569483-S | KIF21A    | 13 | 0.257   | 0.0104   | 9.34  | 4.14E-20 | 3.69E-17 |
| Gl_33356156-S | APOBEC3H  | 13 | 0.249   | 0.0409   | 9.04  | 6.13E-19 | 4.99E-16 |
| Gl_34147604-S | OPTN      | 13 | 0.245   | 0.00638  | 8.86  | 2.81E-18 | 2.07E-15 |
| Gl_22749032-S | MANEAL    | 13 | 0.244   | 0.0380   | 8.85  | 2.86E-18 | 2.08E-15 |
| Gl_4885266-S  | GF11      | 13 | 0.243   | 0.0124   | 8.80  | 4.34E-18 | 3.06E-15 |
| Gl_21450644-S | TTC16     | 13 | 0.242   | 0.0206   | 8.79  | 4.92E-18 | 3.42E-15 |
| Gl_7662169-S  | NUAK1     | 13 | 0.233   | 0.0333   | 8.45  | 8.21E-17 | 4.91E-14 |
| hmm2656-S     | LINC00944 | 13 | 0.228   | 0.0405   | 8.24  | 4.18E-16 | 2.20E-13 |
| Gl_14670372-A | PCBP4     | 13 | 0.223   | 0.0116   | 8.06  | 1.83E-15 | 8.99E-13 |
| Gl_16905508-A | B3GAT1    | 13 | 0.222   | 0.0285   | 8.03  | 2.29E-15 | 1.10E-12 |
| Hs.11594-S    | ---       | 13 | 0.221   | 0.0117   | 7.97  | 3.63E-15 | 1.67E-12 |
| Gl_5453735-S  | MAF       | 13 | 0.220   | 0.00839  | 7.92  | 5.13E-15 | 2.31E-12 |
| hmm30181-S    | TNIP3     | 13 | 0.219   | 0.0326   | 7.88  | 6.89E-15 | 3.02E-12 |
| Gl_24308074-S | RAB11FIP5 | 13 | 0.218   | 0.0152   | 7.88  | 7.32E-15 | 3.18E-12 |
| Gl_27484243-S | PATL2     | 13 | 0.216   | 0.0314   | 7.77  | 1.60E-14 | 6.29E-12 |
| Gl_27597087-S | CYB561    | 13 | 0.215   | 0.0105   | 7.74  | 1.99E-14 | 7.66E-12 |
| Gl_4826845-S  | MYO6      | 13 | 0.215   | 0.0389   | 7.74  | 2.10E-14 | 8.00E-12 |
| Gl_5174402-S  | CACNA2D2  | 13 | 0.209   | 0.0127   | 7.52  | 1.06E-13 | 3.75E-11 |
| Gl_37550187-S | C5orf56   | 13 | 0.205   | 0.00473  | 7.33  | 4.25E-13 | 1.31E-10 |
| Gl_37550554-S | ZBTB38    | 13 | 0.198   | 0.0104   | 7.09  | 2.26E-12 | 5.87E-10 |
| Gl_22538813-S | CCL5      | 13 | 0.197   | 0.0111   | 7.08  | 2.49E-12 | 6.39E-10 |
| Gl_42659320-S | ---       | 13 | 0.196   | 0.00723  | 7.04  | 3.19E-12 | 8.06E-10 |
| Hs.293917-S   | ---       | 13 | 0.192   | 0.0171   | 6.90  | 8.03E-12 | 1.88E-09 |
| Gl_21070979-A | PAM       | 13 | 0.192   | 0.00454  | 6.85  | 1.17E-11 | 2.64E-09 |
| Gl_24308397-S | TMEM116   | 13 | 0.191   | 0.00629  | 6.84  | 1.22E-11 | 2.73E-09 |
| Gl_13569955-S | ARPC5L    | 13 | 0.191   | 0.00517  | 6.82  | 1.44E-11 | 3.19E-09 |
| Gl_42657283-S | C5orf56   | 13 | 0.189   | 0.00601  | 6.77  | 1.96E-11 | 4.30E-09 |
| Gl_4506520-S  | RGS9      | 13 | 0.182   | 0.0227   | 6.52  | 1.01E-10 | 1.86E-08 |
| Gl_21361441-S | C18orf8   | 13 | 0.183   | 0.00256  | 6.45  | 1.61E-10 | 2.91E-08 |
| Gl_21361572-S | CHN1      | 13 | 0.179   | 0.0252   | 6.41  | 2.02E-10 | 3.53E-08 |
| Gl_5453624-S  | C1orf61   | 13 | 0.179   | 0.0161   | 6.41  | 2.09E-10 | 3.64E-08 |
| Gl_22325374-A | EDARADD   | 13 | 0.178   | 0.0187   | 6.37  | 2.63E-10 | 4.45E-08 |
| Gl_24307908-S | RALGDS    | 13 | 0.178   | 0.00938  | 6.36  | 2.90E-10 | 4.87E-08 |
| Hs.513794-S   | ---       | 13 | 0.177   | 0.0310   | 6.35  | 3.05E-10 | 5.10E-08 |
| hmm19468-S    | ---       | 13 | 0.177   | 0.0107   | 6.34  | 3.28E-10 | 5.41E-08 |
| Hs.243596-S   | KATNAL1   | 13 | 0.175   | 0.00765  | 6.25  | 5.52E-10 | 8.71E-08 |
| Gl_33946273-A | PRDM1     | 13 | 0.175   | 0.00824  | 6.25  | 5.59E-10 | 8.75E-08 |
| Gl_4502686-S  | CD84      | 13 | 0.174   | 0.00670  | 6.21  | 7.34E-10 | 1.12E-07 |
| Gl_4501848-S  | ABCA3     | 13 | 0.173   | 0.0113   | 6.18  | 8.75E-10 | 1.31E-07 |
| Gl_37549797-S | FCRL6     | 13 | 0.172   | 0.0163   | 6.15  | 1.03E-09 | 1.53E-07 |
| Gl_31377630-S | GBP5      | 13 | 0.172   | 0.00670  | 6.15  | 1.05E-09 | 1.56E-07 |
| Gl_18860903-S | PTPRM     | 13 | 0.170   | 0.0324   | 6.08  | 1.61E-09 | 2.33E-07 |
| Gl_4506374-S  | RAB7L1    | 13 | 0.169   | 0.00498  | 6.00  | 2.55E-09 | 3.56E-07 |
| Gl_18579257-S | ---       | 13 | 0.165   | 0.0249   | 5.89  | 4.90E-09 | 6.41E-07 |
| Gl_41872576-S | RFTN1     | 13 | 0.166   | 0.00300  | 5.89  | 5.00E-09 | 6.52E-07 |
| Gl_13376859-S | SLC35G2   | 13 | 0.165   | 0.0250   | 5.89  | 5.10E-09 | 6.60E-07 |
| Gl_4503928-S  | GATA3     | 13 | 0.165   | 0.00707  | 5.88  | 5.14E-09 | 6.62E-07 |
| Gl_22749528-S | C17orf66  | 13 | 0.165   | 0.0162   | 5.88  | 5.26E-09 | 6.77E-07 |
| Gl_21359902-S | HDGFRP3   | 13 | 0.163   | 0.0103   | 5.81  | 7.90E-09 | 9.86E-07 |
| Gl_37059743-S | PIP4K2C   | 13 | 0.164   | 0.00318  | 5.81  | 8.11E-09 | 1.00E-06 |
| Gl_34303927-S | ATP1A3    | 13 | 0.162   | 0.00962  | 5.79  | 8.92E-09 | 1.10E-06 |
| Gl_7706110-S  | CD320     | 13 | 0.160   | 0.00605  | 5.71  | 1.42E-08 | 1.68E-06 |
| Gl_41406088-S | SOX13     | 13 | 0.160   | 0.0134   | 5.70  | 1.45E-08 | 1.72E-06 |
| Hs.517064-S   | ---       | 13 | 0.160   | 0.00845  | 5.69  | 1.55E-08 | 1.82E-06 |
| Gl_13399303-S | APOBEC3G  | 13 | 0.160   | 0.00563  | 5.69  | 1.56E-08 | 1.82E-06 |
| hmm15467-S    | ---       | 13 | 0.159   | 0.00849  | 5.66  | 1.84E-08 | 2.11E-06 |
| Gl_25121959-S | PTCH1     | 13 | 0.157   | 0.00826  | 5.60  | 2.64E-08 | 2.95E-06 |
| Gl_6466447-S  | DSTN      | 13 | 0.158   | 0.00366  | 5.59  | 2.73E-08 | 3.03E-06 |
| Gl_22749050-S | ---       | 13 | 0.157   | 0.00875  | 5.58  | 3.02E-08 | 3.32E-06 |
| Gl_28559030-A | IL5RA     | 13 | 0.150   | 0.0214   | 5.36  | 1.00E-07 | 9.90E-06 |
| Gl_42661316-S | ---       | 13 | 0.150   | 0.00868  | 5.33  | 1.18E-07 | 1.14E-05 |

|               |           |    |        |         |      |          |          |
|---------------|-----------|----|--------|---------|------|----------|----------|
| GI_28376647-S | ---       | 13 | 0.150  | 0.0120  | 5.32 | 1.21E-07 | 1.16E-05 |
| GI_37595540-A | TRIM69    | 13 | 0.149  | 0.00717 | 5.31 | 1.32E-07 | 1.26E-05 |
| GI_22748764-S | CLDND2    | 13 | 0.148  | 0.0254  | 5.28 | 1.54E-07 | 1.44E-05 |
| GI_37540072-S | MCOLN2    | 13 | 0.148  | 0.0139  | 5.27 | 1.59E-07 | 1.49E-05 |
| GI_16418372-S | ---       | 13 | 0.147  | 0.0143  | 5.22 | 2.10E-07 | 1.93E-05 |
| GI_34335276-S | PPP1R16B  | 13 | 0.146  | 0.00380 | 5.18 | 2.60E-07 | 2.31E-05 |
| GI_31341110-S | TIGIT     | 13 | 0.144  | 0.0211  | 5.12 | 3.49E-07 | 3.02E-05 |
| GI_7662301-S  | TBKBP1    | 13 | 0.143  | 0.0129  | 5.10 | 3.99E-07 | 3.38E-05 |
| GI_21237760-S | CD81      | 13 | 0.144  | 0.00317 | 5.09 | 4.13E-07 | 3.48E-05 |
| GI_31324542-S | CAMK2N1   | 13 | 0.142  | 0.0158  | 5.06 | 4.89E-07 | 4.03E-05 |
| Hs.442319-S   | ---       | 13 | 0.142  | 0.0229  | 5.05 | 5.10E-07 | 4.19E-05 |
| GI_21389384-S | RHEBL1    | 13 | 0.141  | 0.00670 | 5.02 | 5.94E-07 | 4.84E-05 |
| GI_22749520-S | GK5       | 13 | 0.139  | 0.00814 | 4.94 | 8.75E-07 | 6.79E-05 |
| GI_19923492-S | PLEKHA5   | 13 | 0.139  | 0.0107  | 4.93 | 9.28E-07 | 7.15E-05 |
| GI_37543871-S | DNAH10    | 13 | 0.138  | 0.0227  | 4.90 | 1.11E-06 | 8.32E-05 |
| GI_41146823-S | ---       | 13 | 0.136  | 0.0197  | 4.84 | 1.49E-06 | 0.000106 |
| GI_4557248-S  | ADA       | 13 | 0.137  | 0.00271 | 4.84 | 1.49E-06 | 0.000106 |
| GI_24497439-A | IL12RB1   | 13 | 0.135  | 0.0117  | 4.81 | 1.71E-06 | 0.000119 |
| GI_37550189-S | SEPT8     | 13 | 0.134  | 0.0212  | 4.77 | 2.07E-06 | 0.000142 |
| GI_27478592-S | ---       | 13 | 0.133  | 0.00507 | 4.71 | 2.75E-06 | 0.000183 |
| GI_33946273-I | PRDM1     | 13 | 0.132  | 0.00693 | 4.70 | 2.89E-06 | 0.000192 |
| GI_40254903-S | CASZ1     | 13 | 0.132  | 0.00735 | 4.68 | 3.21E-06 | 0.000210 |
| GI_8922178-S  | STYK1     | 13 | 0.131  | 0.0179  | 4.65 | 3.62E-06 | 0.000235 |
| GI_42716310-S | ARNTL     | 13 | 0.131  | 0.00288 | 4.63 | 4.02E-06 | 0.000256 |
| GI_31377810-S | LSS       | 13 | 0.131  | 0.00558 | 4.63 | 4.06E-06 | 0.000259 |
| GI_11386198-S | PVRL3     | 13 | 0.130  | 0.0224  | 4.61 | 4.50E-06 | 0.000283 |
| GI_13518027-S | BFSP1     | 13 | 0.129  | 0.0141  | 4.58 | 5.16E-06 | 0.000319 |
| GI_13540544-S | ZBP1      | 13 | 0.129  | 0.00466 | 4.57 | 5.27E-06 | 0.000325 |
| Hs.374140-S   | ---       | 13 | 0.127  | 0.0153  | 4.51 | 7.06E-06 | 0.000424 |
| GI_42544245-S | SEPW1     | 13 | 0.127  | 0.00251 | 4.46 | 8.84E-06 | 0.000521 |
| GI_29731922-S | CEP78     | 13 | 0.125  | 0.00686 | 4.44 | 9.87E-06 | 0.000575 |
| GI_22095346-S | CADM1     | 13 | 0.124  | 0.0164  | 4.40 | 1.17E-05 | 0.000671 |
| GI_23957707-S | LPCAT4    | 13 | 0.123  | 0.00349 | 4.36 | 1.40E-05 | 0.000775 |
| GI_7662357-S  | ENPP4     | 13 | 0.123  | 0.00616 | 4.35 | 1.49E-05 | 0.000822 |
| GI_33187364-S | EIF5A2    | 13 | 0.121  | 0.00511 | 4.28 | 1.98E-05 | 0.00104  |
| GI_34222262-S | ITPR1PL1  | 13 | 0.120  | 0.00751 | 4.26 | 2.24E-05 | 0.00114  |
| GI_38455386-S | ENPP5     | 13 | 0.119  | 0.0194  | 4.21 | 2.71E-05 | 0.00134  |
| GI_8051633-S  | RARRES3   | 13 | 0.119  | 0.00384 | 4.20 | 2.84E-05 | 0.00139  |
| GI_22779931-A | SYNE1     | 13 | 0.118  | 0.00356 | 4.19 | 3.05E-05 | 0.00148  |
| GI_37551767-S | TMEM181   | 13 | 0.118  | 0.00471 | 4.16 | 3.36E-05 | 0.00160  |
| GI_34147575-S | IL32      | 13 | 0.117  | 0.00588 | 4.13 | 3.87E-05 | 0.00179  |
| Hs.515625-S   | ---       | 13 | 0.116  | 0.0126  | 4.13 | 3.92E-05 | 0.00180  |
| GI_19743812-I | ITGB1     | 13 | 0.115  | 0.00415 | 4.08 | 4.76E-05 | 0.00213  |
| GI_8922070-S  | ZNF821    | 13 | 0.115  | 0.00580 | 4.08 | 4.89E-05 | 0.00218  |
| GI_12408645-S | CAPN2     | 13 | 0.115  | 0.00337 | 4.07 | 4.99E-05 | 0.00222  |
| GI_18104977-S | PTPN1     | 13 | 0.115  | 0.00258 | 4.07 | 4.99E-05 | 0.00222  |
| GI_13376227-S | HDAC11    | 13 | 0.115  | 0.0129  | 4.07 | 5.07E-05 | 0.00225  |
| GI_25121986-S | NCAPH     | 13 | 0.113  | 0.0184  | 4.01 | 6.31E-05 | 0.00272  |
| GI_22749146-S | SH3RF2    | 13 | 0.112  | 0.0174  | 3.96 | 7.96E-05 | 0.00328  |
| GI_42661849-S | PRSS57    | 13 | 0.112  | 0.0164  | 3.95 | 8.11E-05 | 0.00332  |
| GI_18105053-S | KIFAP3    | 13 | 0.112  | 0.00343 | 3.95 | 8.27E-05 | 0.00337  |
| GI_21361404-S | RGS17     | 13 | 0.111  | 0.0186  | 3.94 | 8.62E-05 | 0.00350  |
| GI_24797159-S | TAP1      | 13 | 0.111  | 0.00230 | 3.92 | 9.17E-05 | 0.00368  |
| GI_44917605-S | NAPB      | 13 | 0.111  | 0.00323 | 3.91 | 9.75E-05 | 0.00386  |
| GI_4504884-I  | KLRC3     | 13 | 0.108  | 0.00780 | 3.84 | 0.000129 | 0.00487  |
| GI_22748722-S | ACOT4     | 13 | 0.108  | 0.0168  | 3.81 | 0.000145 | 0.00537  |
| GI_29736110-S | LINC00239 | 13 | 0.107  | 0.0145  | 3.80 | 0.000153 | 0.00558  |
| GI_34335234-A | CORO2A    | 13 | 0.107  | 0.0104  | 3.80 | 0.000153 | 0.00558  |
| GI_10835046-S | SGCE      | 13 | 0.107  | 0.0152  | 3.79 | 0.000157 | 0.00570  |
| GI_13375645-S | LRFN3     | 13 | 0.107  | 0.0130  | 3.78 | 0.000164 | 0.00590  |
| GI_4758913-S  | LITAF     | 13 | 0.106  | 0.00486 | 3.76 | 0.000178 | 0.00633  |
| GI_20270354-S | GALM      | 13 | 0.106  | 0.00607 | 3.75 | 0.000182 | 0.00647  |
| GI_21464103-S | YWHAQ     | 13 | 0.106  | 0.00314 | 3.75 | 0.000185 | 0.00655  |
| GI_32189374-S | SGCB      | 13 | 0.105  | 0.0127  | 3.72 | 0.000205 | 0.00711  |
| GI_24371267-S | NAP1L5    | 13 | 0.105  | 0.00544 | 3.70 | 0.000222 | 0.00760  |
| GI_31542523-S | VOPP1     | 13 | 0.105  | 0.00287 | 3.69 | 0.000231 | 0.00787  |
| GI_21361293-S | KLRG1     | 13 | 0.104  | 0.00565 | 3.68 | 0.000242 | 0.00819  |
| GI_4885170-S  | MAMLD1    | 13 | 0.104  | 0.0125  | 3.68 | 0.000246 | 0.00830  |
| GI_42661179-S | TBKBP1    | 13 | 0.104  | 0.00675 | 3.67 | 0.000254 | 0.00852  |
| GI_22547143-A | FBXO32    | 13 | 0.102  | 0.00373 | 3.60 | 0.000332 | 0.0106   |
| GI_31542788-S | EPHX4     | 13 | 0.102  | 0.00647 | 3.60 | 0.000335 | 0.0106   |
| Hs.23853-S    | ZBTB38    | 13 | 0.100  | 0.0138  | 3.54 | 0.000412 | 0.0125   |
| GI_40538791-S | NIP7      | 13 | 0.0990 | 0.00441 | 3.50 | 0.000486 | 0.0142   |
| GI_31377534-S | ---       | 13 | 0.0989 | 0.00176 | 3.47 | 0.000536 | 0.0155   |
| GI_41281572-S | BAHD1     | 13 | 0.0963 | 0.00235 | 3.39 | 0.000720 | 0.0196   |
| GI_22054273-S | TMEM244   | 13 | 0.0947 | 0.0116  | 3.35 | 0.000831 | 0.0219   |
| Hs.8882-S     | GPR68     | 13 | 0.0938 | 0.00721 | 3.32 | 0.000934 | 0.0239   |
| GI_42656068-S | ---       | 13 | 0.0938 | 0.00416 | 3.31 | 0.000947 | 0.0242   |
| GI_38327616-S | SLAMF6    | 13 | 0.0928 | 0.00365 | 3.28 | 0.001081 | 0.0268   |
| GI_24586683-A | SYNM      | 13 | 0.0921 | 0.0123  | 3.26 | 0.001159 | 0.0283   |
| GI_37059782-S | NINL      | 13 | 0.0920 | 0.00761 | 3.25 | 0.001175 | 0.0286   |
| GI_29171703-A | MAGED2    | 13 | 0.0911 | 0.00143 | 3.19 | 0.001477 | 0.0342   |
| GI_40805101-S | ZNF276    | 13 | 0.0897 | 0.00258 | 3.16 | 0.001606 | 0.0366   |
| GI_34147355-S | NABP2     | 13 | 0.0894 | 0.00401 | 3.16 | 0.001631 | 0.0370   |
| GI_10863920-S | DLG3      | 13 | 0.0888 | 0.0127  | 3.14 | 0.001726 | 0.0387   |
| GI_4557328-S  | FASLG     | 13 | 0.0885 | 0.0111  | 3.13 | 0.001802 | 0.0399   |
| GI_33624872-A | SYNE2     | 13 | 0.0881 | 0.0139  | 3.11 | 0.001887 | 0.0414   |

|               |          |    |         |          |       |          |          |
|---------------|----------|----|---------|----------|-------|----------|----------|
| GI_31563332-A | AKAP13   | 13 | 0.0890  | 0.00133  | 3.11  | 0.001910 | 0.0417   |
| GI_25952146-A | TNFSF14  | 13 | 0.0879  | 0.00452  | 3.11  | 0.001943 | 0.0423   |
| hmm31250-S    | GRPEL2   | 13 | 0.0871  | 0.00396  | 3.07  | 0.002151 | 0.0458   |
| GI_42658956-S | TOX      | 13 | 0.0860  | 0.0125   | 3.04  | 0.002409 | 0.0499   |
| GI_13929470-S | B4GALT5  | 14 | 0.287   | 0.00645  | 10.5  | 8.67E-25 | 1.58E-21 |
| GI_31377551-S | RAP2A    | 14 | 0.227   | 0.00769  | 8.18  | 7.17E-16 | 3.69E-13 |
| GI_4502280-S  | ATP1B3   | 14 | 0.189   | 0.00427  | 6.74  | 2.44E-11 | 5.24E-09 |
| GI_23510430-A | FAS      | 14 | 0.187   | 0.00806  | 6.68  | 3.52E-11 | 7.34E-09 |
| GI_42660339-S | ---      | 14 | 0.181   | 0.00357  | 6.43  | 1.82E-10 | 3.23E-08 |
| GI_22129777-S | SRXN1    | 14 | 0.176   | 0.00543  | 6.29  | 4.26E-10 | 6.87E-08 |
| GI_19743892-I | TADA3    | 14 | 0.177   | 0.00283  | 6.25  | 5.58E-10 | 8.75E-08 |
| GI_31881629-S | PTGER2   | 14 | 0.175   | 0.00665  | 6.25  | 5.67E-10 | 8.83E-08 |
| GI_9845514-I  | S100A4   | 14 | 0.170   | 0.00570  | 6.08  | 1.63E-09 | 2.34E-07 |
| GI_6006015-S  | LGALS1   | 14 | 0.168   | 0.00573  | 5.99  | 2.76E-09 | 3.76E-07 |
| GI_6006040-S  | SLC25A20 | 14 | 0.166   | 0.00507  | 5.90  | 4.70E-09 | 6.17E-07 |
| GI_7705703-S  | GSTK1    | 14 | 0.157   | 0.00260  | 5.53  | 3.97E-08 | 4.25E-06 |
| GI_5729985-S  | POP4     | 14 | 0.156   | 0.00220  | 5.47  | 5.44E-08 | 5.71E-06 |
| GI_31742486-S | KIF3B    | 14 | 0.152   | 0.00227  | 5.35  | 1.06E-07 | 1.04E-05 |
| GI_20986530-A | MAPK1    | 14 | 0.149   | 0.00328  | 5.28  | 1.52E-07 | 1.43E-05 |
| GI_32455253-A | CERS2    | 14 | 0.148   | 0.00229  | 5.21  | 2.23E-07 | 2.02E-05 |
| GI_21264579-S | TSPAN2   | 14 | 0.146   | 0.0229   | 5.20  | 2.35E-07 | 2.13E-05 |
| GI_20986528-I | MAPK1    | 14 | 0.147   | 0.00244  | 5.19  | 2.48E-07 | 2.22E-05 |
| GI_30023852-S | MTSS1    | 14 | 0.146   | 0.00527  | 5.17  | 2.68E-07 | 2.38E-05 |
| GI_41406049-S | DOK2     | 14 | 0.145   | 0.00512  | 5.16  | 2.81E-07 | 2.48E-05 |
| GI_19743895-A | TADA3    | 14 | 0.146   | 0.00328  | 5.16  | 2.89E-07 | 2.55E-05 |
| GI_41222100-S | DPY19L1  | 14 | 0.145   | 0.00475  | 5.13  | 3.31E-07 | 2.88E-05 |
| GI_19743818-A | ITGB1    | 14 | 0.143   | 0.00679  | 5.08  | 4.37E-07 | 3.65E-05 |
| GI_4758013-S  | CMKLR1   | 14 | 0.142   | 0.00876  | 5.03  | 5.51E-07 | 4.50E-05 |
| GI_10835138-S | FCGR3B   | 14 | 0.140   | 0.00877  | 4.96  | 8.12E-07 | 6.33E-05 |
| GI_5901975-S  | PLA2G16  | 14 | 0.139   | 0.00507  | 4.93  | 9.41E-07 | 7.21E-05 |
| GI_14589848-S | GNGT2    | 14 | 0.138   | 0.0130   | 4.91  | 1.05E-06 | 7.98E-05 |
| GI_24475653-S | PROK2    | 14 | 0.137   | 0.00917  | 4.86  | 1.31E-06 | 9.62E-05 |
| GI_10835237-S | IFITM2   | 14 | 0.136   | 0.00514  | 4.83  | 1.52E-06 | 0.000108 |
| GI_21361584-S | PALLD    | 14 | 0.134   | 0.0130   | 4.76  | 2.20E-06 | 0.000150 |
| GI_40254972-S | PRR5L    | 14 | 0.133   | 0.0115   | 4.74  | 2.38E-06 | 0.000160 |
| GI_20986530-I | MAPK1    | 14 | 0.131   | 0.00254  | 4.62  | 4.33E-06 | 0.000274 |
| GI_6005957-S  | VSIG4    | 14 | 0.129   | 0.0128   | 4.56  | 5.54E-06 | 0.000339 |
| GI_4557504-S  | CYBA     | 14 | 0.124   | 0.00268  | 4.37  | 1.33E-05 | 0.000742 |
| GI_5454165-S  | VT11B    | 14 | 0.122   | 0.00271  | 4.29  | 1.94E-05 | 0.00103  |
| GI_15812191-S | FBXO6    | 14 | 0.121   | 0.00678  | 4.28  | 2.01E-05 | 0.00105  |
| GI_5174428-S  | ACAA2    | 14 | 0.121   | 0.00319  | 4.28  | 2.04E-05 | 0.00107  |
| GI_21361911-S | DNAJC1   | 14 | 0.120   | 0.00335  | 4.23  | 2.51E-05 | 0.00126  |
| GI_31982935-S | SGPL1    | 14 | 0.119   | 0.00281  | 4.22  | 2.66E-05 | 0.00132  |
| GI_38679886-A | SRI      | 14 | 0.120   | 0.00264  | 4.22  | 2.67E-05 | 0.00132  |
| GI_31542585-S | EIF4EBP2 | 14 | 0.119   | 0.00209  | 4.18  | 3.15E-05 | 0.00152  |
| GI_22538439-I | CTSC     | 14 | 0.118   | 0.00340  | 4.16  | 3.41E-05 | 0.00162  |
| GI_24797070-S | HLA-E    | 14 | 0.116   | 0.00298  | 4.09  | 4.54E-05 | 0.00205  |
| GI_41055203-A | KLC1     | 14 | 0.115   | 0.00228  | 4.04  | 5.77E-05 | 0.00251  |
| GI_27883865-S | RIC8A    | 14 | 0.114   | 0.00289  | 4.03  | 5.80E-05 | 0.00252  |
| GI_38683837-S | CD47     | 14 | 0.113   | 0.00334  | 3.99  | 6.86E-05 | 0.00291  |
| GI_4809272-S  | ANXA4    | 14 | 0.112   | 0.00293  | 3.95  | 8.09E-05 | 0.00332  |
| GI_20357549-S | TMEM50A  | 14 | 0.111   | 0.00302  | 3.92  | 9.31E-05 | 0.00372  |
| Hs.273124-S   | ---      | 14 | 0.111   | 0.0172   | 3.91  | 9.55E-05 | 0.00380  |
| GI_40254883-S | SSH1     | 14 | 0.108   | 0.00472  | 3.84  | 0.000131 | 0.00493  |
| GI_38570088-S | RCBTB2   | 14 | 0.108   | 0.00460  | 3.83  | 0.000134 | 0.00500  |
| GI_4557830-S  | PCBD1    | 14 | 0.108   | 0.00329  | 3.83  | 0.000136 | 0.00506  |
| GI_28872747-S | HIST3H2A | 14 | 0.106   | 0.0137   | 3.74  | 0.000190 | 0.00669  |
| GI_42660445-S | ---      | 14 | 0.106   | 0.00325  | 3.73  | 0.000197 | 0.00689  |
| GI_4503536-S  | EIF4EBP3 | 14 | -0.105  | -0.00502 | -3.71 | 0.000216 | 0.00742  |
| GI_14141194-S | SDF2     | 14 | 0.105   | 0.00186  | 3.69  | 0.000237 | 0.00803  |
| GI_31543395-S | PGAM1    | 14 | 0.102   | 0.00329  | 3.61  | 0.000321 | 0.0103   |
| GI_29736248-S | GNG2     | 14 | 0.102   | 0.00492  | 3.60  | 0.000331 | 0.0106   |
| GI_34222257-S | UFD1L    | 14 | 0.102   | 0.00193  | 3.58  | 0.000355 | 0.0111   |
| GI_13236586-S | TMEM43   | 14 | 0.102   | 0.00193  | 3.57  | 0.000367 | 0.0114   |
| GI_17978490-I | CD97     | 14 | 0.100   | 0.0119   | 3.56  | 0.000391 | 0.0120   |
| GI_31377633-S | GBP4     | 14 | 0.101   | 0.00320  | 3.55  | 0.000396 | 0.0121   |
| GI_20127456-S | GYG1     | 14 | 0.101   | 0.00196  | 3.55  | 0.000403 | 0.0123   |
| GI_21687150-S | SLC25A43 | 14 | 0.100   | 0.00335  | 3.54  | 0.000414 | 0.0125   |
| GI_22265328-S | CRADD    | 14 | 0.0991  | 0.00503  | 3.50  | 0.000475 | 0.0140   |
| GI_4502676-S  | CD58     | 14 | 0.0991  | 0.00400  | 3.50  | 0.000482 | 0.0141   |
| GI_22538439-A | CTSC     | 14 | 0.0978  | 0.00336  | 3.45  | 0.000574 | 0.0164   |
| GI_38524617-S | FMNL2    | 14 | 0.0973  | 0.0170   | 3.44  | 0.000598 | 0.0169   |
| GI_4503020-S  | CPT1A    | 14 | 0.0957  | 0.0138   | 3.38  | 0.000734 | 0.0198   |
| GI_25777679-I | RASSF1   | 14 | 0.0957  | 0.0125   | 3.38  | 0.000738 | 0.0199   |
| GI_13775601-A | SIRT2    | 14 | 0.0955  | 0.00616  | 3.38  | 0.000757 | 0.0203   |
| GI_31543813-S | TMSB10   | 14 | 0.0960  | 0.00155  | 3.36  | 0.000800 | 0.0213   |
| GI_4757755-S  | ANXA2    | 14 | 0.0953  | 0.00222  | 3.35  | 0.000823 | 0.0218   |
| GI_30089943-I | ---      | 14 | 0.0945  | 0.00256  | 3.33  | 0.000892 | 0.0231   |
| GI_37541953-S | ---      | 14 | 0.0942  | 0.0146   | 3.33  | 0.000894 | 0.0231   |
| GI_7705816-S  | ZNF706   | 14 | -0.0937 | -0.00228 | -3.30 | 0.000997 | 0.0251   |
| GI_32967275-A | UBE2A    | 14 | 0.0938  | 0.00167  | 3.29  | 0.001034 | 0.0259   |
| GI_7706157-S  | PLAC8    | 14 | -0.0930 | -0.00351 | -3.28 | 0.001056 | 0.0263   |
| GI_17986259-A | MYL6     | 14 | 0.0933  | 0.00154  | 3.27  | 0.001114 | 0.0275   |
| GI_34916047-S | TMTCT1   | 14 | 0.0922  | 0.0115   | 3.26  | 0.001150 | 0.0282   |
| GI_42518069-S | TJP2     | 14 | 0.0921  | 0.00460  | 3.25  | 0.001166 | 0.0285   |
| GI_4507310-S  | SUPT4H1  | 14 | 0.0925  | 0.00217  | 3.25  | 0.001167 | 0.0285   |
| GI_30149745-S | SHISA4   | 14 | 0.0918  | 0.0107   | 3.24  | 0.001208 | 0.0292   |

|               |          |    |        |          |       |          |          |
|---------------|----------|----|--------|----------|-------|----------|----------|
| GI_17572806-S | ROPN1L   | 14 | 0.0917 | 0.00883  | 3.24  | 0.001215 | 0.0293   |
| GI_20336472-I | BCL7B    | 14 | 0.0911 | 0.00498  | 3.22  | 0.001316 | 0.0311   |
| GI_19923135-S | CX3CR1   | 14 | 0.0904 | 0.00676  | 3.20  | 0.001426 | 0.0332   |
| GI_13129033-S | AHNAK    | 14 | 0.0902 | 0.0114   | 3.19  | 0.001463 | 0.0339   |
| GI_4502100-S  | ANXA1    | 14 | 0.0899 | 0.00407  | 3.17  | 0.001538 | 0.0353   |
| GI_4505670-S  | PDE6D    | 14 | 0.0900 | 0.00193  | 3.17  | 0.001587 | 0.0362   |
| GI_23110994-A | MS4A4A   | 14 | 0.0894 | 0.0142   | 3.16  | 0.001620 | 0.0368   |
| GI_22538438-I | CTSC     | 14 | 0.0892 | 0.00287  | 3.15  | 0.001699 | 0.0382   |
| hmm3151-S     | FAM177A1 | 14 | 0.0885 | 0.00677  | 3.13  | 0.001807 | 0.0400   |
| GI_20561649-S | ZNF319   | 14 | 0.0880 | 0.00336  | 3.10  | 0.001951 | 0.0425   |
| GI_22538474-S | UBB      | 14 | 0.0880 | 0.00183  | 3.09  | 0.002040 | 0.0440   |
| GI_4557885-S  | ITGB2    | 14 | 0.0878 | 0.00216  | 3.09  | 0.002053 | 0.0443   |
| GI_7662289-S  | IQSEC1   | 14 | 0.0875 | 0.00322  | 3.09  | 0.002067 | 0.0445   |
| GI_34222336-S | C3orf14  | 14 | 0.0874 | 0.00472  | 3.08  | 0.002082 | 0.0447   |
| hmm36544-S    | NHSL2    | 14 | 0.0865 | 0.0123   | 3.06  | 0.002285 | 0.0480   |
| GI_31543149-S | MFSD5    | 14 | 0.0867 | 0.00257  | 3.05  | 0.002309 | 0.0484   |
| GI_4885526-A  | SH2D3C   | 14 | 0.0865 | 0.00254  | 3.05  | 0.002352 | 0.0490   |
| GI_14249149-S | SSBP4    | 15 | 0.306  | 0.00591  | 11.2  | 5.81E-28 | 1.83E-24 |
| GI_32454742-S | SESN2    | 15 | 0.222  | 0.00761  | 7.99  | 3.06E-15 | 1.42E-12 |
| GI_4502848-S  | TBCB     | 15 | 0.210  | 0.00284  | 7.44  | 1.88E-13 | 6.20E-11 |
| GI_9910391-S  | AGPAT4   | 15 | 0.206  | 0.00780  | 7.41  | 2.39E-13 | 7.65E-11 |
| GI_7662347-S  | MLXIP    | 15 | -0.203 | -0.00462 | -7.26 | 6.67E-13 | 1.97E-10 |
| GI_4503744-S  | FLNA     | 15 | 0.199  | 0.00474  | 7.12  | 1.88E-12 | 4.91E-10 |
| GI_4557252-S  | ADAM8    | 15 | 0.198  | 0.00432  | 7.09  | 2.30E-12 | 5.93E-10 |
| GI_5453861-S  | PDE4A    | 15 | 0.187  | 0.00580  | 6.69  | 3.39E-11 | 7.09E-09 |
| GI_45433498-S | ZDHHHC18 | 15 | 0.187  | 0.00377  | 6.67  | 3.95E-11 | 8.11E-09 |
| GI_10880123-A | CYTH2    | 15 | 0.187  | 0.00372  | 6.65  | 4.38E-11 | 8.96E-09 |
| GI_30240931-S | EHD1     | 15 | 0.185  | 0.00385  | 6.59  | 6.37E-11 | 1.23E-08 |
| GI_4504756-S  | ITGAL    | 15 | 0.180  | 0.00546  | 6.43  | 1.79E-10 | 3.19E-08 |
| GI_22779872-S | FAM89B   | 15 | 0.180  | 0.00444  | 6.40  | 2.15E-10 | 3.72E-08 |
| GI_31543430-S | PPP1CA   | 15 | 0.176  | 0.00328  | 6.24  | 6.13E-10 | 9.47E-08 |
| GI_13194196-S | KIF13B   | 15 | 0.176  | 0.00293  | 6.23  | 6.19E-10 | 9.53E-08 |
| GI_22547178-S | TRPV2    | 15 | 0.173  | 0.00473  | 6.18  | 8.69E-10 | 1.30E-07 |
| GI_42734309-S | FAM53B   | 15 | 0.171  | 0.00530  | 6.10  | 1.43E-09 | 2.08E-07 |
| GI_24430213-S | IL10RA   | 15 | 0.169  | 0.00321  | 5.99  | 2.79E-09 | 3.79E-07 |
| GI_4503554-S  | ELF4     | 15 | 0.166  | 0.00341  | 5.88  | 5.13E-09 | 6.62E-07 |
| GI_22547192-A | ---      | 15 | 0.157  | 0.00342  | 5.56  | 3.38E-08 | 3.68E-06 |
| GI_21312133-S | MED15    | 15 | 0.154  | 0.00365  | 5.46  | 5.74E-08 | 5.98E-06 |
| GI_21735617-A | APOL1    | 15 | 0.153  | 0.00420  | 5.43  | 6.60E-08 | 6.79E-06 |
| GI_38679906-S | TPRG1L   | 15 | 0.154  | 0.00270  | 5.43  | 6.73E-08 | 6.89E-06 |
| GI_34147645-S | PLOD3    | 15 | 0.150  | 0.00354  | 5.33  | 1.16E-07 | 1.14E-05 |
| GI_37552547-S | MAST3    | 15 | 0.148  | 0.00306  | 5.25  | 1.79E-07 | 1.66E-05 |
| GI_34452697-S | ACTN4    | 15 | 0.148  | 0.00358  | 5.24  | 1.86E-07 | 1.71E-05 |
| GI_40254469-S | SPN      | 15 | 0.146  | 0.00485  | 5.18  | 2.54E-07 | 2.27E-05 |
| GI_7705876-S  | HN1      | 15 | 0.144  | 0.00508  | 5.13  | 3.43E-07 | 2.98E-05 |
| GI_37550526-S | HEG1     | 15 | 0.143  | 0.00606  | 5.07  | 4.60E-07 | 3.82E-05 |
| GI_31543175-S | FAM134A  | 15 | 0.143  | 0.00306  | 5.07  | 4.63E-07 | 3.83E-05 |
| GI_17978488-A | CD97     | 15 | 0.141  | 0.00571  | 4.99  | 6.80E-07 | 5.44E-05 |
| GI_41281560-S | CLSTN1   | 15 | 0.141  | 0.00259  | 4.96  | 7.85E-07 | 6.18E-05 |
| GI_38373674-A | RAPGEF1  | 15 | 0.140  | 0.00385  | 4.96  | 8.10E-07 | 6.32E-05 |
| GI_38016920-S | RAB35    | 15 | 0.139  | 0.00216  | 4.89  | 1.12E-06 | 8.33E-05 |
| GI_13929468-S | B4GALT3  | 15 | 0.138  | 0.00272  | 4.88  | 1.18E-06 | 8.76E-05 |
| GI_5453959-S  | RABAC1   | 15 | 0.138  | 0.00271  | 4.88  | 1.20E-06 | 8.89E-05 |
| GI_31341881-S | C6orf1   | 15 | 0.139  | 0.00199  | 4.87  | 1.25E-06 | 9.19E-05 |
| GI_4502564-S  | CAPNS1   | 15 | 0.137  | 0.00430  | 4.85  | 1.39E-06 | 0.000102 |
| GI_4753160-S  | GTF3C1   | 15 | 0.137  | 0.00406  | 4.85  | 1.40E-06 | 0.000102 |
| GI_22538458-A | NCOA1    | 15 | 0.137  | 0.00298  | 4.85  | 1.41E-06 | 0.000103 |
| GI_30795206-S | PPP2R5B  | 15 | 0.135  | 0.00322  | 4.79  | 1.90E-06 | 0.000131 |
| GI_34452731-S | PREX1    | 15 | 0.134  | 0.00273  | 4.72  | 2.67E-06 | 0.000178 |
| GI_4885060-S  | AKT1     | 15 | 0.131  | 0.00320  | 4.65  | 3.68E-06 | 0.000238 |
| GI_28178831-S | IDH2     | 15 | 0.128  | 0.00254  | 4.53  | 6.50E-06 | 0.000395 |
| GI_37551220-S | ZSWIM8   | 15 | 0.126  | 0.00243  | 4.45  | 9.27E-06 | 0.000543 |
| GI_42734435-S | EFHD2    | 15 | 0.125  | 0.00483  | 4.43  | 1.01E-05 | 0.000586 |
| GI_22547113-A | MRPL10   | 15 | 0.125  | 0.00350  | 4.41  | 1.11E-05 | 0.000640 |
| GI_20302162-S | PIP4K2A  | 15 | 0.125  | 0.00325  | 4.41  | 1.12E-05 | 0.000642 |
| GI_10947033-S | MXD4     | 15 | 0.125  | 0.00268  | 4.40  | 1.19E-05 | 0.000677 |
| GI_20336261-S | GGA1     | 15 | 0.124  | 0.00305  | 4.39  | 1.23E-05 | 0.000695 |
| GI_6006019-S  | MAD2L2   | 15 | 0.124  | 0.00451  | 4.39  | 1.24E-05 | 0.000703 |
| GI_5174578-S  | FOXO4    | 15 | 0.122  | 0.00363  | 4.33  | 1.64E-05 | 0.000888 |
| GI_19387853-S | NTNG2    | 15 | 0.122  | 0.00473  | 4.32  | 1.67E-05 | 0.000899 |
| GI_22907038-S | APOBEC3C | 15 | 0.122  | 0.00419  | 4.32  | 1.70E-05 | 0.000916 |
| GI_34147566-S | GUK1     | 15 | 0.121  | 0.00246  | 4.27  | 2.13E-05 | 0.00111  |
| GI_5031962-S  | STUB1    | 15 | 0.121  | 0.00248  | 4.27  | 2.14E-05 | 0.00111  |
| GI_7706468-S  | KLF2     | 15 | 0.120  | 0.00468  | 4.25  | 2.25E-05 | 0.00115  |
| GI_39777595-S | TGIF2    | 15 | -0.120 | -0.00237 | -4.24 | 2.35E-05 | 0.00119  |
| GI_31543978-S | ZBTB16   | 15 | -0.119 | -0.00613 | -4.22 | 2.67E-05 | 0.00132  |
| GI_7549806-S  | FBXW2    | 15 | 0.119  | 0.00305  | 4.19  | 3.03E-05 | 0.00147  |
| GI_34304384-S | YKT6     | 15 | 0.120  | 0.00154  | 4.18  | 3.13E-05 | 0.00151  |
| GI_31742531-S | DIAPH1   | 15 | 0.118  | 0.00209  | 4.17  | 3.31E-05 | 0.00159  |
| GI_4557468-S  | AP2B1    | 15 | 0.118  | 0.00311  | 4.15  | 3.50E-05 | 0.00166  |
| GI_32483393-A | CLTB     | 15 | 0.117  | 0.00266  | 4.13  | 3.89E-05 | 0.00180  |
| GI_4826975-S  | RCE1     | 15 | 0.116  | 0.00297  | 4.08  | 4.83E-05 | 0.00216  |
| GI_27894367-S | NOTCH1   | 15 | 0.115  | 0.00281  | 4.07  | 4.99E-05 | 0.00222  |
| GI_24308106-S | SZRD1    | 15 | 0.115  | 0.00290  | 4.06  | 5.14E-05 | 0.00227  |
| GI_39995073-A | CDKN2D   | 15 | 0.114  | 0.00387  | 4.05  | 5.55E-05 | 0.00243  |
| GI_21361093-S | IKBKG    | 15 | 0.115  | 0.00187  | 4.02  | 6.07E-05 | 0.00263  |
| GI_31083143-A | AXIN1    | 15 | 0.114  | 0.00253  | 4.01  | 6.56E-05 | 0.00280  |

|               |           |    |         |          |       |          |          |
|---------------|-----------|----|---------|----------|-------|----------|----------|
| GI_8923476-S  | TMEM160   | 15 | 0.113   | 0.00231  | 3.99  | 6.89E-05 | 0.00292  |
| GI_4505904-S  | PMM1      | 15 | 0.113   | 0.00341  | 3.99  | 7.05E-05 | 0.00297  |
| GI_7706342-S  | FAM96B    | 15 | 0.114   | 0.00166  | 3.98  | 7.39E-05 | 0.00308  |
| GI_39725676-S | NUCB1     | 15 | 0.112   | 0.00316  | 3.96  | 8.01E-05 | 0.00330  |
| GI_32171185-S | BCAP31    | 15 | 0.112   | 0.00197  | 3.95  | 8.43E-05 | 0.00342  |
| GI_39725675-S | CDK2AP2   | 15 | 0.111   | 0.00336  | 3.94  | 8.64E-05 | 0.00350  |
| GI_6552331-S  | FLOT1     | 15 | 0.112   | 0.00183  | 3.93  | 9.11E-05 | 0.00366  |
| GI_34147718-S | ZNF688    | 15 | 0.111   | 0.00315  | 3.91  | 9.64E-05 | 0.00382  |
| GI_5454109-S  | TESK1     | 15 | 0.111   | 0.00246  | 3.90  | 9.95E-05 | 0.00393  |
| GI_4507840-S  | UQCRC1    | 15 | 0.110   | 0.00201  | 3.88  | 0.000110 | 0.00425  |
| GI_4502896-S  | CLPTM1    | 15 | 0.110   | 0.00249  | 3.88  | 0.000112 | 0.00431  |
| GI_19923916-S | SHKBP1    | 15 | 0.109   | 0.00349  | 3.86  | 0.000118 | 0.00451  |
| GI_25286702-S | KIAA2013  | 15 | 0.110   | 0.00164  | 3.85  | 0.000125 | 0.00474  |
| GI_21361780-S | MAP7D1    | 15 | 0.109   | 0.00203  | 3.84  | 0.000129 | 0.00487  |
| GI_24475860-S | PHPT1     | 15 | 0.109   | 0.00199  | 3.84  | 0.000131 | 0.00492  |
| GI_11321629-S | NR1H2     | 15 | 0.109   | 0.00214  | 3.82  | 0.000138 | 0.00512  |
| GI_34147606-S | CNPPD1    | 15 | 0.108   | 0.00211  | 3.78  | 0.000162 | 0.00585  |
| GI_21361508-S | ---       | 15 | 0.107   | 0.00181  | 3.76  | 0.000181 | 0.00643  |
| GI_9910203-S  | ---       | 15 | 0.106   | 0.00326  | 3.75  | 0.000184 | 0.00653  |
| GI_4557552-S  | EMD       | 15 | 0.106   | 0.00291  | 3.75  | 0.000189 | 0.00665  |
| GI_34147601-S | ARHGDIA   | 15 | 0.106   | 0.00290  | 3.74  | 0.000192 | 0.00675  |
| GI_7657045-S  | UBE2S     | 15 | 0.106   | 0.00349  | 3.74  | 0.000193 | 0.00678  |
| GI_21361484-S | TBC1D10B  | 15 | 0.106   | 0.00288  | 3.73  | 0.000198 | 0.00693  |
| GI_7662409-S  | SBNO2     | 15 | 0.105   | 0.00419  | 3.72  | 0.000205 | 0.00712  |
| GI_38372922-A | BSG       | 15 | 0.105   | 0.00324  | 3.72  | 0.000205 | 0.00712  |
| GI_10864068-S | TMEM8A    | 15 | 0.104   | 0.00343  | 3.67  | 0.000253 | 0.00848  |
| GI_32481208-A | MAPKAPK2  | 15 | 0.104   | 0.00235  | 3.67  | 0.000254 | 0.00852  |
| GI_40068460-S | TWF2      | 15 | 0.104   | 0.00297  | 3.67  | 0.000257 | 0.00858  |
| GI_14149701-S | RNF167    | 15 | 0.104   | 0.00278  | 3.66  | 0.000258 | 0.00860  |
| GI_37552347-S | GPR108    | 15 | 0.104   | 0.00196  | 3.65  | 0.000270 | 0.00893  |
| GI_13259507-A | DCTN1     | 15 | 0.104   | 0.00230  | 3.65  | 0.000274 | 0.00901  |
| GI_23397652-S | PIGT      | 15 | 0.104   | 0.00201  | 3.64  | 0.000283 | 0.00926  |
| GI_31543199-S | TMUB1     | 15 | 0.103   | 0.00285  | 3.62  | 0.000301 | 0.00975  |
| GI_40254968-S | NUDT18    | 15 | 0.102   | 0.00300  | 3.62  | 0.000312 | 0.0101   |
| GI_23110949-S | CTSD      | 15 | 0.102   | 0.00345  | 3.61  | 0.000319 | 0.0102   |
| GI_27544940-S | MYO1F     | 15 | 0.102   | 0.00345  | 3.59  | 0.000345 | 0.0109   |
| GI_38455425-S | CITED4    | 15 | -0.101  | -0.00342 | -3.58 | 0.000354 | 0.0111   |
| GI_38016942-S | ORAI1     | 15 | 0.101   | 0.00376  | 3.58  | 0.000361 | 0.0113   |
| GI_4758925-S  | PITPNM1   | 15 | 0.101   | 0.00358  | 3.55  | 0.000398 | 0.0122   |
| GI_38570148-S | VWVC3     | 15 | 0.101   | 0.00205  | 3.55  | 0.000404 | 0.0123   |
| GI_37537720-S | B3GALT6   | 15 | -0.101  | -0.00205 | -3.55 | 0.000405 | 0.0123   |
| GI_14149741-S | CALCOCO1  | 15 | 0.100   | 0.00276  | 3.54  | 0.000421 | 0.0127   |
| GI_14917108-S | AP2M1     | 15 | 0.101   | 0.00199  | 3.54  | 0.000421 | 0.0127   |
| GI_37546496-S | SSU72     | 15 | 0.0985  | 0.00217  | 3.47  | 0.000543 | 0.0157   |
| GI_4557258-S  | ADCY9     | 15 | 0.0977  | 0.00531  | 3.45  | 0.000575 | 0.0164   |
| GI_41281455-S | RAB11FIP3 | 15 | 0.0971  | 0.00245  | 3.42  | 0.000641 | 0.0179   |
| GI_8922347-S  | TMEM39B   | 15 | -0.0972 | -0.00177 | -3.41 | 0.000664 | 0.0184   |
| GI_12408655-S | CAPN1     | 15 | 0.0964  | 0.00199  | 3.39  | 0.000724 | 0.0197   |
| GI_33636765-S | LHPP      | 15 | -0.0957 | -0.00203 | -3.37 | 0.000788 | 0.0210   |
| GI_6005793-S  | PRAF2     | 15 | 0.0949  | 0.00340  | 3.35  | 0.000833 | 0.0219   |
| GI_34335250-A | DLGAP4    | 15 | 0.0949  | 0.00261  | 3.35  | 0.000847 | 0.0222   |
| GI_4507102-S  | SNAPC2    | 15 | 0.0947  | 0.00256  | 3.34  | 0.000865 | 0.0225   |
| GI_42476331-S | SH3BGR13  | 15 | 0.0944  | 0.00454  | 3.34  | 0.000873 | 0.0227   |
| GI_23510449-S | MPST      | 15 | 0.0940  | 0.00343  | 3.32  | 0.000930 | 0.0238   |
| GI_4507508-S  | TIMP1     | 15 | 0.0939  | 0.00517  | 3.32  | 0.000936 | 0.0240   |
| GI_33356147-S | FMNL1     | 15 | 0.0939  | 0.00265  | 3.31  | 0.000954 | 0.0244   |
| GI_14249553-S | SPRYD3    | 15 | 0.0939  | 0.00257  | 3.31  | 0.000965 | 0.0246   |
| GI_23397668-S | ARPC4     | 15 | 0.0940  | 0.00219  | 3.31  | 0.000968 | 0.0246   |
| GI_4504196-S  | GTF2F1    | 15 | 0.0933  | 0.00221  | 3.29  | 0.001046 | 0.0261   |
| GI_21361267-S | TNIP1     | 15 | 0.0931  | 0.00190  | 3.27  | 0.001104 | 0.0273   |
| GI_4506026-S  | PPP4C     | 15 | 0.0928  | 0.00237  | 3.27  | 0.001112 | 0.0275   |
| GI_16753213-S | PFN1      | 15 | 0.0930  | 0.00180  | 3.27  | 0.001115 | 0.0275   |
| GI_24307876-S | POR       | 15 | 0.0925  | 0.00309  | 3.26  | 0.001130 | 0.0278   |
| GI_18201904-S | GPI       | 15 | 0.0926  | 0.00200  | 3.26  | 0.001153 | 0.0283   |
| GI_16357476-S | CDC34     | 15 | 0.0915  | 0.00287  | 3.23  | 0.001284 | 0.0306   |
| GI_7669500-S  | LAMP1     | 15 | 0.0919  | 0.00168  | 3.22  | 0.001297 | 0.0309   |
| GI_6912247-S  | DNPEP     | 15 | 0.0913  | 0.00261  | 3.22  | 0.001319 | 0.0312   |
| GI_45333920-S | ASB8      | 15 | 0.0911  | 0.00264  | 3.21  | 0.001349 | 0.0318   |
| GI_38146105-S | SLC52A2   | 15 | 0.0910  | 0.00300  | 3.21  | 0.001365 | 0.0321   |
| GI_22095348-S | WDTC1     | 15 | 0.0909  | 0.00236  | 3.20  | 0.001398 | 0.0327   |
| GI_40018625-S | MOB3A     | 15 | 0.0907  | 0.00212  | 3.19  | 0.001455 | 0.0338   |
| GI_4504750-S  | ITGA5     | 15 | 0.0905  | 0.00243  | 3.19  | 0.001462 | 0.0339   |
| GI_20127505-S | PMVK      | 15 | 0.0905  | 0.00209  | 3.18  | 0.001491 | 0.0345   |
| GI_31377621-S | DEDD2     | 15 | 0.0897  | 0.00195  | 3.15  | 0.001654 | 0.0374   |
| GI_33859747-S | CENPBD1P1 | 15 | 0.0891  | 0.00519  | 3.15  | 0.001681 | 0.0379   |
| GI_23943871-S | SMAP2     | 15 | -0.0896 | -0.00171 | -3.14 | 0.001707 | 0.0383   |
| GI_19718752-S | BAP1      | 15 | 0.0889  | 0.00270  | 3.14  | 0.001757 | 0.0392   |
| GI_13569961-S | RAB1B     | 15 | 0.0880  | 0.00411  | 3.11  | 0.001931 | 0.0422   |
| GI_24475655-S | FBXW4     | 15 | 0.0882  | 0.00173  | 3.10  | 0.001995 | 0.0432   |
| GI_21703709-S | SHISA5    | 15 | 0.0881  | 0.00190  | 3.10  | 0.002002 | 0.0433   |
| GI_17105397-I | WDR1      | 15 | 0.0875  | 0.00273  | 3.09  | 0.002072 | 0.0446   |
| GI_4507204-S  | SRF       | 15 | 0.0874  | 0.00239  | 3.08  | 0.002124 | 0.0454   |
| GI_11345483-S | ZFAND3    | 15 | 0.0869  | 0.00210  | 3.06  | 0.002282 | 0.0480   |
| GI_40538727-S | PLEKHM1   | 15 | 0.0865  | 0.00234  | 3.04  | 0.002377 | 0.0494   |
| GI_32307157-S | AGAP3     | 15 | 0.0864  | 0.00237  | 3.04  | 0.002398 | 0.0497   |
| GI_18375627-A | PRRC2A    | 15 | 0.0866  | 0.00180  | 3.04  | 0.002408 | 0.0499   |
| GI_4507544-S  | GPR137B   | 16 | 0.297   | 0.00669  | 10.9  | 1.90E-26 | 4.50E-23 |

|               |          |    |        |          |       |          |          |
|---------------|----------|----|--------|----------|-------|----------|----------|
| GI_31543930-S | VAMP5    | 16 | 0.226  | 0.00557  | 8.13  | 1.05E-15 | 5.32E-13 |
| GI_7705752-S  | C1QA     | 16 | 0.214  | 0.0134   | 7.70  | 2.82E-14 | 1.06E-11 |
| GI_34335231-S | CKB      | 16 | 0.210  | 0.0108   | 7.54  | 8.90E-14 | 3.17E-11 |
| GI_34222243-S | RHOC     | 16 | 0.209  | 0.00744  | 7.51  | 1.11E-13 | 3.88E-11 |
| GI_27735072-S | CYP4F22  | 16 | 0.208  | 0.0301   | 7.50  | 1.20E-13 | 4.16E-11 |
| GI_42716282-S | USB1     | 16 | 0.206  | 0.00291  | 7.31  | 4.65E-13 | 1.42E-10 |
| GI_4557440-S  | CDKN1C   | 16 | 0.193  | 0.0118   | 6.92  | 7.03E-12 | 1.67E-09 |
| GI_42476319-S | SUSD1    | 16 | 0.189  | 0.00418  | 6.75  | 2.24E-11 | 4.88E-09 |
| GI_38016929-A | OASL     | 16 | 0.186  | 0.00793  | 6.65  | 4.39E-11 | 8.96E-09 |
| GI_14165470-S | CDC42EP4 | 16 | 0.177  | 0.00614  | 6.31  | 3.83E-10 | 6.24E-08 |
| GI_22202618-A | CTSL     | 16 | 0.175  | 0.0117   | 6.27  | 5.02E-10 | 7.97E-08 |
| GI_31543214-S | MT2A     | 16 | 0.175  | 0.00560  | 6.26  | 5.35E-10 | 8.47E-08 |
| GI_32698963-S | VMO1     | 16 | 0.174  | 0.0236   | 6.22  | 6.63E-10 | 1.02E-07 |
| GI_11038661-S | C1QB     | 16 | 0.174  | 0.0152   | 6.21  | 7.11E-10 | 1.08E-07 |
| GI_22049497-S | LYPD2    | 16 | 0.173  | 0.0113   | 6.18  | 8.60E-10 | 1.29E-07 |
| GI_38679953-A | ABR      | 16 | 0.169  | 0.00310  | 6.00  | 2.64E-09 | 3.64E-07 |
| GI_33620766-S | SCARB1   | 16 | -0.167 | -0.00540 | -5.94 | 3.78E-09 | 5.02E-07 |
| GI_30157733-S | ---      | 16 | 0.166  | 0.00819  | 5.92  | 4.16E-09 | 5.51E-07 |
| GI_8923562-S  | TESC     | 16 | 0.160  | 0.00433  | 5.70  | 1.52E-08 | 1.79E-06 |
| GI_13775223-S | APH1B    | 16 | 0.160  | 0.00327  | 5.68  | 1.68E-08 | 1.94E-06 |
| GI_34328936-S | CD63     | 16 | 0.158  | 0.00480  | 5.61  | 2.54E-08 | 2.84E-06 |
| GI_45387924-S | LYPD2    | 16 | 0.156  | 0.0124   | 5.57  | 3.05E-08 | 3.35E-06 |
| GI_34485718-S | E2F2     | 16 | 0.156  | 0.00549  | 5.55  | 3.43E-08 | 3.73E-06 |
| GI_4504436-S  | HMOX1    | 16 | 0.154  | 0.00528  | 5.46  | 5.66E-08 | 5.91E-06 |
| GI_18087856-S | UBE2F    | 16 | 0.153  | 0.00284  | 5.42  | 7.08E-08 | 7.20E-06 |
| GI_31543384-S | PCYT1A   | 16 | 0.149  | 0.00440  | 5.28  | 1.54E-07 | 1.44E-05 |
| GI_33457315-S | PLEKHO2  | 16 | 0.148  | 0.00514  | 5.27  | 1.62E-07 | 1.51E-05 |
| GI_8924245-S  | BATF3    | 16 | 0.146  | 0.00526  | 5.19  | 2.40E-07 | 2.16E-05 |
| GI_12545400-A | ICAM4    | 16 | 0.145  | 0.00699  | 5.17  | 2.76E-07 | 2.44E-05 |
| GI_42658645-S | ---      | 16 | 0.143  | 0.00337  | 5.06  | 4.80E-07 | 3.96E-05 |
| GI_42476329-S | SFTPD    | 16 | 0.141  | 0.0100   | 5.00  | 6.55E-07 | 5.29E-05 |
| GI_26787979-A | IL15     | 16 | 0.138  | 0.00370  | 4.90  | 1.10E-06 | 8.29E-05 |
| GI_32307143-S | PLOD1    | 16 | 0.136  | 0.00428  | 4.82  | 1.65E-06 | 0.000115 |
| GI_7706275-A  | TPPP3    | 16 | 0.134  | 0.00653  | 4.77  | 2.10E-06 | 0.000144 |
| GI_19913411-A | MVP      | 16 | 0.133  | 0.00342  | 4.69  | 2.97E-06 | 0.000196 |
| GI_40807488-S | EMR1     | 16 | 0.132  | 0.00448  | 4.66  | 3.48E-06 | 0.000227 |
| GI_4757913-S  | CASP5    | 16 | 0.131  | 0.00466  | 4.63  | 3.96E-06 | 0.000255 |
| GI_21071009-S | TCN2     | 16 | 0.131  | 0.00536  | 4.63  | 3.98E-06 | 0.000256 |
| GI_4557384-S  | C3       | 16 | 0.127  | 0.00635  | 4.50  | 7.60E-06 | 0.000456 |
| GI_20127497-S | RRAS     | 16 | 0.126  | 0.00563  | 4.48  | 8.00E-06 | 0.000476 |
| GI_33636716-S | FAM214B  | 16 | 0.126  | 0.00481  | 4.46  | 8.79E-06 | 0.000519 |
| GI_29337288-S | ABI3     | 16 | 0.126  | 0.00338  | 4.46  | 9.04E-06 | 0.000533 |
| GI_9910341-S  | SLAMF8   | 16 | 0.124  | 0.00651  | 4.38  | 1.27E-05 | 0.000717 |
| GI_42490763-S | ELOVL1   | 16 | 0.124  | 0.00219  | 4.37  | 1.34E-05 | 0.000751 |
| GI_23238227-S | CHST7    | 16 | 0.123  | 0.00383  | 4.35  | 1.50E-05 | 0.000826 |
| GI_31541779-S | CYB561D2 | 16 | 0.123  | 0.00193  | 4.32  | 1.66E-05 | 0.000898 |
| GI_23312365-S | TNFRSF1B | 16 | 0.121  | 0.00271  | 4.27  | 2.11E-05 | 0.00110  |
| GI_27754203-S | ---      | 16 | 0.119  | 0.00350  | 4.21  | 2.72E-05 | 0.00134  |
| GI_19923143-S | MYD88    | 16 | 0.119  | 0.00254  | 4.18  | 3.06E-05 | 0.00148  |
| GI_8923465-S  | TMEM127  | 16 | 0.118  | 0.00278  | 4.15  | 3.55E-05 | 0.00168  |
| GI_31543450-S | PRELID1  | 16 | 0.118  | 0.00251  | 4.15  | 3.60E-05 | 0.00170  |
| GI_20127596-S | HES4     | 16 | 0.116  | 0.00825  | 4.11  | 4.29E-05 | 0.00196  |
| GI_19923781-S | LILRB1   | 16 | 0.114  | 0.00410  | 4.02  | 6.20E-05 | 0.00268  |
| GI_31542755-S | PAQR4    | 16 | 0.113  | 0.00314  | 3.97  | 7.48E-05 | 0.00311  |
| GI_34147574-S | HTATIP2  | 16 | 0.113  | 0.00215  | 3.96  | 7.93E-05 | 0.00327  |
| GI_4758085-S  | CSR1P    | 16 | 0.112  | 0.00211  | 3.96  | 8.06E-05 | 0.00331  |
| GI_39725697-S | CALHM2   | 16 | 0.112  | 0.00366  | 3.95  | 8.22E-05 | 0.00336  |
| GI_13236578-S | SLC27A3  | 16 | 0.111  | 0.00423  | 3.94  | 8.72E-05 | 0.00353  |
| GI_38327597-I | RGS12    | 16 | 0.111  | 0.00489  | 3.93  | 9.09E-05 | 0.00365  |
| GI_29648312-S | ASPHD2   | 16 | 0.111  | 0.00239  | 3.92  | 9.31E-05 | 0.00372  |
| GI_23110999-S | MS4A7    | 16 | 0.109  | 0.00517  | 3.84  | 0.000129 | 0.00487  |
| GI_7662125-S  | SIPA1L1  | 16 | 0.108  | 0.00245  | 3.79  | 0.000159 | 0.00575  |
| Hs.284257-S   | ---      | 16 | 0.105  | 0.0174   | 3.73  | 0.000202 | 0.00702  |
| GI_7661727-S  | LAMTOR2  | 16 | 0.106  | 0.00181  | 3.72  | 0.000207 | 0.00716  |
| GI_19718758-A | MYOF     | 16 | 0.105  | 0.00372  | 3.69  | 0.000230 | 0.00783  |
| GI_28872795-S | CEBPB    | 16 | 0.103  | 0.00585  | 3.63  | 0.000298 | 0.00969  |
| GI_4502792-S  | CEACAM3  | 16 | 0.102  | 0.0123   | 3.61  | 0.000314 | 0.0101   |
| GI_24797075-S | HLA-DPB1 | 16 | 0.103  | 0.00200  | 3.61  | 0.000325 | 0.0104   |
| GI_4505020-S  | LRPAP1   | 16 | 0.102  | 0.00198  | 3.58  | 0.000356 | 0.0111   |
| GI_21314629-S | C3AR1    | 16 | 0.101  | 0.00602  | 3.56  | 0.000382 | 0.0118   |
| GI_11545764-S | CXCL16   | 16 | 0.101  | 0.00346  | 3.56  | 0.000391 | 0.0120   |
| GI_32895366-I | LILRA5   | 16 | 0.0991 | 0.00525  | 3.50  | 0.000476 | 0.0140   |
| GI_13376321-S | ---      | 16 | 0.0991 | 0.00489  | 3.50  | 0.000480 | 0.0141   |
| GI_23510436-A | TNFRSF8  | 16 | 0.0980 | 0.00396  | 3.46  | 0.000556 | 0.0160   |
| GI_6031195-S  | PLAGL2   | 16 | 0.0977 | 0.00331  | 3.45  | 0.000583 | 0.0166   |
| GI_4758069-S  | PTGDR2   | 16 | 0.0974 | 0.00555  | 3.44  | 0.000591 | 0.0167   |
| GI_16579887-S | FBP1     | 16 | 0.0964 | 0.00354  | 3.40  | 0.000688 | 0.0188   |
| GI_41393564-S | ITPK1    | 16 | 0.0962 | 0.00295  | 3.39  | 0.000708 | 0.0193   |
| GI_7710155-S  | WARS     | 16 | 0.0956 | 0.00429  | 3.38  | 0.000756 | 0.0203   |
| GI_23110923-S | PSMB10   | 16 | 0.0964 | 0.00150  | 3.37  | 0.000761 | 0.0204   |
| GI_20357564-S | CSTB     | 16 | 0.0954 | 0.00182  | 3.35  | 0.000833 | 0.0219   |
| GI_34147669-S | SLC39A1  | 16 | 0.0948 | 0.00318  | 3.34  | 0.000849 | 0.0222   |
| Hs.501087-S   | ---      | 16 | 0.0946 | 0.00838  | 3.34  | 0.000851 | 0.0223   |
| GI_38372936-A | CHMP2A   | 16 | 0.0952 | 0.00136  | 3.32  | 0.000918 | 0.0236   |
| GI_22907051-S | ARPC1A   | 16 | 0.0956 | 0.00116  | 3.32  | 0.000921 | 0.0237   |
| GI_9938031-S  | SLC2A6   | 16 | 0.0938 | 0.00283  | 3.31  | 0.000962 | 0.0245   |
| GI_37549554-S | ---      | 16 | 0.0933 | 0.0145   | 3.30  | 0.000994 | 0.0251   |

|               |           |    |         |          |       |          |          |
|---------------|-----------|----|---------|----------|-------|----------|----------|
| GI_39930526-S | TNNT1     | 16 | 0.0932  | 0.0126   | 3.30  | 0.001012 | 0.0254   |
| GI_4809285-A  | IRF7      | 16 | -0.0934 | -0.00317 | -3.29 | 0.001016 | 0.0255   |
| GI_21314780-S | NEURL1    | 16 | 0.0921  | 0.00826  | 3.26  | 0.001164 | 0.0284   |
| GI_5729827-S  | TRAFD1    | 16 | 0.0924  | 0.00183  | 3.25  | 0.001199 | 0.0291   |
| GI_20986498-A | MAPK7     | 16 | 0.0921  | 0.00250  | 3.24  | 0.001209 | 0.0292   |
| GI_32189356-S | MRAS      | 16 | 0.0917  | 0.00468  | 3.24  | 0.001232 | 0.0296   |
| GI_27477265-S | FAM212B   | 16 | 0.0913  | 0.00334  | 3.22  | 0.001302 | 0.0309   |
| GI_6912517-S  | ACOT9     | 16 | 0.0909  | 0.00307  | 3.21  | 0.001379 | 0.0323   |
| Hs.136355-S   | ---       | 16 | 0.0906  | 0.0118   | 3.20  | 0.001388 | 0.0325   |
| GI_5032056-S  | S100A11   | 16 | 0.0908  | 0.00307  | 3.20  | 0.001403 | 0.0328   |
| GI_11995467-S | IFITM3    | 16 | 0.0901  | 0.00354  | 3.18  | 0.001505 | 0.0347   |
| GI_4885234-S  | FGR       | 16 | 0.0903  | 0.00209  | 3.18  | 0.001524 | 0.0350   |
| GI_42822885-S | ---       | 16 | 0.0893  | 0.00452  | 3.15  | 0.001653 | 0.0374   |
| GI_30179906-A | PILRA     | 16 | 0.0894  | 0.00317  | 3.15  | 0.001657 | 0.0375   |
| GI_4507868-S  | VASP      | 16 | 0.0898  | 0.00170  | 3.15  | 0.001659 | 0.0375   |
| GI_21389496-S | CCDC12    | 16 | 0.0900  | 0.00135  | 3.15  | 0.001695 | 0.0382   |
| GI_38044287-A | GSN       | 16 | 0.0889  | 0.00289  | 3.13  | 0.001765 | 0.0393   |
| GI_42542393-S | LPCAT3    | 16 | 0.0878  | 0.00173  | 3.08  | 0.002102 | 0.0450   |
| GI_37540588-S | C4orf48   | 16 | 0.0869  | 0.00314  | 3.07  | 0.002214 | 0.0468   |
| GI_10835170-S | IFNG      | 17 | 0.301   | 0.0167   | 11.1  | 2.55E-27 | 7.11E-24 |
| GI_27436944-I | LMNA      | 17 | 0.205   | 0.0128   | 7.36  | 3.27E-13 | 1.02E-10 |
| GI_13899218-S | GABARAPL1 | 17 | 0.201   | 0.00859  | 7.20  | 1.05E-12 | 2.99E-10 |
| GI_5360207-A  | IDS       | 17 | 0.200   | 0.00601  | 7.18  | 1.23E-12 | 3.39E-10 |
| GI_27436944-A | LMNA      | 17 | 0.184   | 0.0132   | 6.58  | 6.73E-11 | 1.29E-08 |
| GI_31880337-S | TUBA1C    | 17 | 0.181   | 0.00375  | 6.44  | 1.71E-10 | 3.06E-08 |
| GI_15812223-A | TRERF1    | 17 | 0.180   | 0.00466  | 6.41  | 2.12E-10 | 3.67E-08 |
| GI_12707565-S | DUSP5     | 17 | 0.169   | 0.00689  | 6.01  | 2.42E-09 | 3.41E-07 |
| GI_5174516-S  | SMAD7     | 17 | 0.166   | 0.0106   | 5.94  | 3.72E-09 | 4.95E-07 |
| GI_34328908-A | DUSP4     | 17 | 0.163   | 0.0127   | 5.83  | 7.16E-09 | 8.99E-07 |
| GI_4504720-S  | IRF1      | 17 | 0.163   | 0.00639  | 5.80  | 8.17E-09 | 1.01E-06 |
| GI_42657338-S | ---       | 17 | 0.162   | 0.00627  | 5.77  | 9.86E-09 | 1.20E-06 |
| GI_4503298-S  | BHLHE40   | 17 | 0.154   | 0.00698  | 5.49  | 4.95E-08 | 5.23E-06 |
| GI_4507728-S  | TUBB2A    | 17 | 0.154   | 0.00945  | 5.49  | 4.98E-08 | 5.25E-06 |
| GI_19743904-A | RORA      | 17 | 0.149   | 0.00629  | 5.28  | 1.50E-07 | 1.41E-05 |
| GI_13699866-S | MAP1LC3B  | 17 | 0.145   | 0.00418  | 5.14  | 3.15E-07 | 2.75E-05 |
| GI_17978496-A | CDKN1A    | 17 | 0.144   | 0.00671  | 5.13  | 3.34E-07 | 2.90E-05 |
| GI_7019524-S  | SERTAD1   | 17 | 0.143   | 0.00633  | 5.09  | 4.21E-07 | 3.53E-05 |
| GI_31343528-S | CCDC71L   | 17 | 0.140   | 0.00435  | 4.98  | 7.19E-07 | 5.71E-05 |
| GI_28416425-I | ZNF655    | 17 | 0.141   | 0.00239  | 4.98  | 7.44E-07 | 5.88E-05 |
| GI_37542672-S | ---       | 17 | 0.138   | 0.00409  | 4.89  | 1.12E-06 | 8.33E-05 |
| GI_4758211-S  | DUSP8     | 17 | 0.138   | 0.00573  | 4.89  | 1.13E-06 | 8.46E-05 |
| GI_40254960-S | DERL1     | 17 | 0.135   | 0.00331  | 4.77  | 2.06E-06 | 0.000142 |
| GI_22027510-A | CDCA4     | 17 | 0.131   | 0.00394  | 4.63  | 3.99E-06 | 0.000256 |
| GI_37655156-S | KLF6      | 17 | 0.130   | 0.00598  | 4.60  | 4.63E-06 | 0.000291 |
| GI_38201674-S | SDC4      | 17 | 0.125   | 0.0163   | 4.42  | 1.07E-05 | 0.000621 |
| GI_14249657-S | MIR22HG   | 17 | 0.124   | 0.00494  | 4.40  | 1.15E-05 | 0.000659 |
| GI_4885516-S  | NFIL3     | 17 | 0.124   | 0.00553  | 4.40  | 1.19E-05 | 0.000677 |
| GI_38327528-I | INSIG1    | 17 | 0.121   | 0.00547  | 4.29  | 1.88E-05 | 0.000999 |
| GI_34577058-S | PLIN2     | 17 | 0.121   | 0.00468  | 4.29  | 1.93E-05 | 0.00102  |
| GI_15718683-S | SERTAD3   | 17 | 0.121   | 0.00348  | 4.27  | 2.09E-05 | 0.00109  |
| GI_4505878-S  | PLEK      | 17 | 0.118   | 0.00496  | 4.19  | 2.98E-05 | 0.00145  |
| GI_34147356-S | DDA1      | 17 | 0.118   | 0.00277  | 4.18  | 3.16E-05 | 0.00152  |
| GI_22035666-S | TOB1      | 17 | 0.118   | 0.00317  | 4.17  | 3.32E-05 | 0.00159  |
| GI_4501944-S  | ADM       | 17 | 0.117   | 0.00912  | 4.15  | 3.55E-05 | 0.00168  |
| GI_40018632-S | IDI1      | 17 | 0.113   | 0.00260  | 3.99  | 6.90E-05 | 0.00292  |
| GI_18087854-S | DYNLL2    | 17 | 0.113   | 0.00409  | 3.99  | 6.97E-05 | 0.00295  |
| GI_30026033-S | SLC35B2   | 17 | 0.113   | 0.00337  | 3.99  | 6.99E-05 | 0.00295  |
| GI_17986282-S | TUBA1A    | 17 | 0.112   | 0.00450  | 3.95  | 8.11E-05 | 0.00332  |
| GI_20149649-S | CHST11    | 17 | 0.111   | 0.00440  | 3.92  | 9.42E-05 | 0.00375  |
| GI_15812192-S | FBXO7     | 17 | 0.111   | 0.00209  | 3.91  | 9.87E-05 | 0.00390  |
| GI_4505460-S  | ENC1      | 17 | 0.110   | 0.00390  | 3.89  | 0.000106 | 0.00413  |
| GI_4504156-S  | CXCL3     | 17 | 0.110   | 0.0102   | 3.89  | 0.000107 | 0.00416  |
| GI_10835118-S | MYO5A     | 17 | 0.110   | 0.00280  | 3.88  | 0.000111 | 0.00428  |
| GI_4503412-S  | HBEGF     | 17 | 0.110   | 0.00719  | 3.88  | 0.000111 | 0.00429  |
| GI_45439368-S | IER5      | 17 | 0.109   | 0.00455  | 3.85  | 0.000123 | 0.00469  |
| GI_5729764-S  | CGRRF1    | 17 | 0.106   | 0.00359  | 3.75  | 0.000185 | 0.00655  |
| GI_31543823-S | TREM1     | 17 | 0.106   | 0.00522  | 3.74  | 0.000192 | 0.00676  |
| GI_14574570-S | BCL2A1    | 17 | 0.106   | 0.00559  | 3.74  | 0.000193 | 0.00678  |
| GI_38524593-S | TIPARP    | 17 | 0.105   | 0.00432  | 3.73  | 0.000200 | 0.00699  |
| GI_34147657-S | DDIT3     | 17 | 0.106   | 0.00374  | 3.73  | 0.000201 | 0.00701  |
| GI_34787408-S | RALGAPB   | 17 | 0.106   | 0.00276  | 3.72  | 0.000205 | 0.00712  |
| GI_42656231-S | ---       | 17 | 0.105   | 0.00315  | 3.72  | 0.000209 | 0.00720  |
| GI_28872721-S | BTG3      | 17 | 0.105   | 0.00587  | 3.70  | 0.000223 | 0.00761  |
| GI_30156248-S | ---       | 17 | 0.104   | 0.00627  | 3.69  | 0.000236 | 0.00801  |
| GI_29745613-S | TP53INP2  | 17 | 0.103   | 0.0177   | 3.65  | 0.000272 | 0.00896  |
| GI_42658610-S | LINC-PINT | 17 | 0.103   | 0.00362  | 3.64  | 0.000282 | 0.00924  |
| GI_31317226-S | EGR1      | 17 | 0.103   | 0.00816  | 3.63  | 0.000291 | 0.00949  |
| GI_4885332-S  | FFAR2     | 17 | 0.102   | 0.00673  | 3.63  | 0.000300 | 0.00973  |
| GI_31652256-S | MAFB      | 17 | 0.102   | 0.00616  | 3.62  | 0.000305 | 0.00988  |
| GI_39725640-S | AKIRIN2   | 17 | 0.102   | 0.00260  | 3.61  | 0.000318 | 0.0102   |
| GI_39930484-S | SLC25A25  | 17 | 0.102   | 0.00206  | 3.60  | 0.000333 | 0.0106   |
| GI_25952110-S | TNF       | 17 | 0.101   | 0.0115   | 3.58  | 0.000354 | 0.0111   |
| GI_28373098-A | ST8SIA4   | 17 | 0.101   | 0.00465  | 3.56  | 0.000381 | 0.0117   |
| GI_27597060-S | UBR2      | 17 | 0.101   | 0.00207  | 3.55  | 0.000396 | 0.0121   |
| GI_38327530-A | INSIG1    | 17 | 0.0992  | 0.00316  | 3.50  | 0.000480 | 0.0141   |
| GI_5174460-S  | HCAR3     | 17 | 0.0988  | 0.00844  | 3.49  | 0.000494 | 0.0144   |
| GI_21362043-S | C9orf89   | 17 | 0.0985  | 0.00224  | 3.47  | 0.000546 | 0.0157   |

|               |            |    |         |          |       |          |          |
|---------------|------------|----|---------|----------|-------|----------|----------|
| GI_32698821-S | ZFAND2A    | 17 | 0.0978  | 0.00291  | 3.45  | 0.000582 | 0.0166   |
| GI_34147366-S | MAPKAP1    | 17 | 0.0974  | 0.00151  | 3.41  | 0.000670 | 0.0185   |
| GI_31377612-S | MYADM      | 17 | 0.0966  | 0.00351  | 3.41  | 0.000671 | 0.0185   |
| GI_34222319-S | JOSD1      | 17 | 0.0959  | 0.00283  | 3.38  | 0.000738 | 0.0199   |
| GI_27735130-S | FAM117B    | 17 | -0.0957 | -0.00333 | -3.38 | 0.000754 | 0.0203   |
| GI_27485722-S | LOC284454  | 17 | 0.0951  | 0.00742  | 3.36  | 0.000799 | 0.0213   |
| GI_21361192-S | CD44       | 17 | 0.0945  | 0.00285  | 3.33  | 0.000886 | 0.0229   |
| GI_37539752-S | ---        | 17 | 0.0937  | 0.00264  | 3.30  | 0.000985 | 0.0249   |
| hmm23840-S    | ---        | 17 | 0.0915  | 0.00446  | 3.23  | 0.001257 | 0.0301   |
| GI_20336474-A | BCL7B      | 17 | 0.0912  | 0.00256  | 3.22  | 0.001337 | 0.0315   |
| GI_39930398-S | TP53INP2   | 17 | 0.0910  | 0.00647  | 3.21  | 0.001340 | 0.0316   |
| GI_27886537-I | ATP2A2     | 17 | 0.0903  | 0.00246  | 3.18  | 0.001495 | 0.0345   |
| GI_40807461-S | GZF1       | 17 | 0.0898  | 0.00652  | 3.17  | 0.001549 | 0.0355   |
| GI_32171174-S | BUD31      | 17 | 0.0891  | 0.00227  | 3.14  | 0.001745 | 0.0390   |
| GI_21040323-A | BCL6       | 17 | 0.0885  | 0.00394  | 3.13  | 0.001813 | 0.0401   |
| GI_10835186-S | SOD2       | 17 | 0.0882  | 0.00366  | 3.11  | 0.001900 | 0.0416   |
| GI_21071004-S | PHLDA2     | 17 | 0.0876  | 0.0171   | 3.10  | 0.001998 | 0.0433   |
| GI_31542687-S | COQ10B     | 17 | 0.0880  | 0.00214  | 3.10  | 0.001999 | 0.0433   |
| GI_22035597-S | MAP3K8     | 17 | 0.0875  | 0.00371  | 3.09  | 0.002046 | 0.0441   |
| GI_40788016-S | TRIB1      | 17 | 0.0874  | 0.00410  | 3.09  | 0.002081 | 0.0447   |
| GI_8923223-A  | LRRFIP2    | 17 | 0.0870  | 0.00200  | 3.06  | 0.002253 | 0.0475   |
| GI_31377584-S | SPATA2L    | 17 | 0.0865  | 0.00276  | 3.05  | 0.002355 | 0.0490   |
| GI_34147050-S | GDPD5      | 18 | 0.302   | 0.00988  | 11.1  | 2.15E-27 | 6.36E-24 |
| GI_4505036-S  | LTBP4      | 18 | 0.281   | 0.00692  | 10.3  | 9.44E-24 | 1.49E-20 |
| GI_18375661-A | PTPN7      | 18 | 0.253   | 0.00699  | 9.18  | 1.80E-19 | 1.52E-16 |
| hmm525-S      | SFXN3      | 18 | 0.209   | 0.00429  | 7.47  | 1.53E-13 | 5.21E-11 |
| GI_24497439-I | IL12RB1    | 18 | 0.206   | 0.00561  | 7.39  | 2.72E-13 | 8.63E-11 |
| GI_4758173-S  | DMPK       | 18 | 0.195   | 0.00784  | 6.99  | 4.50E-12 | 1.11E-09 |
| GI_31542746-S | COMTD1     | 18 | 0.171   | 0.00433  | 6.08  | 1.62E-09 | 2.34E-07 |
| GI_14165459-A | NARF       | 18 | 0.170   | 0.00353  | 6.02  | 2.23E-09 | 3.17E-07 |
| GI_30749197-A | FBXW5      | 18 | 0.168   | 0.00376  | 5.96  | 3.30E-09 | 4.43E-07 |
| GI_45356148-S | TSPAN17    | 18 | 0.165   | 0.00473  | 5.87  | 5.56E-09 | 7.08E-07 |
| GI_34335254-S | DCTN2      | 18 | 0.167   | 0.00193  | 5.83  | 6.99E-09 | 8.80E-07 |
| GI_24497621-S | TRIM11     | 18 | 0.163   | 0.00449  | 5.81  | 7.99E-09 | 9.94E-07 |
| GI_30794221-S | BTBD6      | 18 | 0.164   | 0.00283  | 5.79  | 8.78E-09 | 1.08E-06 |
| GI_34147369-S | TNIP2      | 18 | 0.160   | 0.00357  | 5.68  | 1.64E-08 | 1.91E-06 |
| GI_24476008-S | RHBDD2     | 18 | 0.159   | 0.00469  | 5.66  | 1.89E-08 | 2.16E-06 |
| GI_31343485-S | RNF166     | 18 | 0.159   | 0.00418  | 5.65  | 1.95E-08 | 2.20E-06 |
| GI_20070295-S | RNPEPL1    | 18 | 0.157   | 0.00363  | 5.57  | 3.13E-08 | 3.43E-06 |
| GI_37552316-S | MIDN       | 18 | 0.151   | 0.00512  | 5.37  | 9.27E-08 | 9.25E-06 |
| GI_13112053-S | FGFRL1     | 18 | 0.151   | 0.00550  | 5.36  | 1.00E-07 | 9.90E-06 |
| GI_30151609-S | PHF19      | 18 | 0.146   | 0.00319  | 5.18  | 2.57E-07 | 2.29E-05 |
| GI_20070291-S | CHST12     | 18 | 0.144   | 0.00511  | 5.12  | 3.45E-07 | 2.99E-05 |
| GI_4757805-S  | VPS9D1     | 18 | 0.144   | 0.00510  | 5.10  | 3.98E-07 | 3.38E-05 |
| GI_27734692-S | C14orf80   | 18 | 0.143   | 0.00431  | 5.09  | 4.19E-07 | 3.52E-05 |
| GI_42741656-A | ---        | 18 | 0.139   | 0.00366  | 4.94  | 8.91E-07 | 6.88E-05 |
| GI_4506138-S  | CHMP1A     | 18 | 0.139   | 0.00302  | 4.91  | 1.03E-06 | 7.80E-05 |
| GI_20544181-S | WDR13      | 18 | 0.136   | 0.00241  | 4.81  | 1.70E-06 | 0.000119 |
| GI_34147672-S | ST6GALNAC6 | 18 | 0.135   | 0.00458  | 4.79  | 1.85E-06 | 0.000128 |
| GI_38488711-S | TANGO2     | 18 | 0.135   | 0.00310  | 4.77  | 2.06E-06 | 0.000142 |
| GI_38016939-S | MON1B      | 18 | 0.135   | 0.00272  | 4.75  | 2.27E-06 | 0.000154 |
| GI_22091444-S | GFR2       | 18 | 0.134   | 0.00586  | 4.75  | 2.29E-06 | 0.000155 |
| GI_5803022-S  | LMAN2      | 18 | 0.134   | 0.00299  | 4.74  | 2.39E-06 | 0.000161 |
| GI_11321627-S | CTRC       | 18 | 0.133   | 0.00929  | 4.72  | 2.57E-06 | 0.000172 |
| GI_34147603-S | STX4       | 18 | 0.132   | 0.00209  | 4.63  | 4.09E-06 | 0.000260 |
| GI_4505492-S  | OGDH       | 18 | 0.131   | 0.00324  | 4.63  | 4.13E-06 | 0.000262 |
| GI_42661328-S | FAM195B    | 18 | 0.130   | 0.00462  | 4.62  | 4.14E-06 | 0.000262 |
| GI_8922332-S  | PLEKHJ1    | 18 | 0.131   | 0.00267  | 4.61  | 4.34E-06 | 0.000274 |
| GI_32528285-A | ACOT7      | 18 | 0.130   | 0.00441  | 4.59  | 4.79E-06 | 0.000299 |
| GI_19923461-S | PHF21A     | 18 | 0.131   | 0.00183  | 4.59  | 4.89E-06 | 0.000304 |
| GI_39725688-S | TUBB4B     | 18 | 0.129   | 0.00426  | 4.57  | 5.34E-06 | 0.000329 |
| GI_40353752-S | ---        | 18 | 0.127   | 0.00296  | 4.49  | 7.61E-06 | 0.000456 |
| GI_7019374-S  | FHOD1      | 18 | 0.127   | 0.00263  | 4.47  | 8.53E-06 | 0.000505 |
| GI_34594668-S | MOB2       | 18 | 0.123   | 0.00245  | 4.33  | 1.59E-05 | 0.000867 |
| GI_10092596-S | MCOLN1     | 18 | 0.122   | 0.00343  | 4.31  | 1.77E-05 | 0.000945 |
| GI_38679901-S | TMEM44     | 18 | 0.121   | 0.00477  | 4.28  | 1.99E-05 | 0.00105  |
| GI_23199980-S | WIPF2      | 18 | 0.121   | 0.00247  | 4.26  | 2.15E-05 | 0.00111  |
| GI_40353205-S | C6orf106   | 18 | 0.120   | 0.00335  | 4.26  | 2.22E-05 | 0.00114  |
| GI_21686972-S | ---        | 18 | 0.120   | 0.00445  | 4.25  | 2.26E-05 | 0.00115  |
| GI_4505304-S  | MYL5       | 18 | -0.120  | -0.00351 | -4.24 | 2.39E-05 | 0.00121  |
| GI_19924146-A | TCIRG1     | 18 | 0.120   | 0.00425  | 4.23  | 2.47E-05 | 0.00124  |
| GI_40255030-S | GSDMD      | 18 | 0.120   | 0.00234  | 4.23  | 2.52E-05 | 0.00126  |
| GI_29789109-S | TMCC3      | 18 | 0.119   | 0.00376  | 4.22  | 2.57E-05 | 0.00129  |
| GI_41872473-S | ETV6       | 18 | 0.119   | 0.00394  | 4.22  | 2.61E-05 | 0.00130  |
| GI_7662489-S  | PPP6R1     | 18 | 0.119   | 0.00289  | 4.22  | 2.64E-05 | 0.00131  |
| GI_40549452-S | ZBTB7A     | 18 | 0.119   | 0.00550  | 4.22  | 2.68E-05 | 0.00132  |
| GI_42476122-S | RUSC1      | 18 | 0.119   | 0.00200  | 4.18  | 3.13E-05 | 0.00151  |
| GI_5031816-S  | KATNB1     | 18 | 0.118   | 0.00224  | 4.14  | 3.71E-05 | 0.00173  |
| GI_4504222-S  | GUSB       | 18 | 0.118   | 0.00205  | 4.13  | 3.83E-05 | 0.00178  |
| GI_16753217-S | PURA       | 18 | 0.117   | 0.00250  | 4.13  | 3.89E-05 | 0.00180  |
| GI_34147470-S | VPS26B     | 18 | 0.116   | 0.00243  | 4.09  | 4.68E-05 | 0.00210  |
| GI_17978482-A | VPS16      | 18 | 0.115   | 0.00327  | 4.06  | 5.13E-05 | 0.00227  |
| GI_20070341-S | TMEM62     | 18 | 0.115   | 0.00199  | 4.04  | 5.60E-05 | 0.00244  |
| GI_34147460-S | TMBIM1     | 18 | 0.114   | 0.00236  | 4.01  | 6.53E-05 | 0.00279  |
| GI_41872428-S | TRPC4AP    | 18 | 0.113   | 0.00198  | 3.98  | 7.21E-05 | 0.00302  |
| GI_8051619-A  | LIMK2      | 18 | 0.113   | 0.00296  | 3.98  | 7.38E-05 | 0.00308  |
| GI_41350328-S | MFN2       | 18 | 0.112   | 0.00356  | 3.95  | 8.41E-05 | 0.00342  |

|               |          |    |         |          |       |          |          |
|---------------|----------|----|---------|----------|-------|----------|----------|
| GI_37541410-S | KIAA0556 | 18 | 0.111   | 0.00242  | 3.92  | 9.40E-05 | 0.00375  |
| GI_33469950-A | RABGGTA  | 18 | 0.111   | 0.00216  | 3.91  | 9.60E-05 | 0.00382  |
| GI_16445440-S | TRIM26   | 18 | 0.111   | 0.00242  | 3.90  | 0.000101 | 0.00396  |
| GI_42734322-S | ZSWIM8   | 18 | 0.110   | 0.00260  | 3.88  | 0.000109 | 0.00425  |
| GI_42662295-S | ---      | 18 | 0.107   | 0.00396  | 3.79  | 0.000157 | 0.00570  |
| GI_5902089-S  | SLC2A3   | 18 | 0.106   | 0.00445  | 3.76  | 0.000177 | 0.00631  |
| GI_34147526-S | TP53I13  | 18 | 0.106   | 0.00391  | 3.75  | 0.000183 | 0.00648  |
| GI_20336247-S | PCSK7    | 18 | 0.107   | 0.00228  | 3.75  | 0.000182 | 0.00648  |
| GI_4505288-S  | MVD      | 18 | 0.104   | 0.00569  | 3.67  | 0.000257 | 0.00858  |
| GI_45269143-A | KEAP1    | 18 | 0.104   | 0.00205  | 3.65  | 0.000271 | 0.00894  |
| GI_37655182-S | NDRG1    | 18 | 0.104   | 0.00187  | 3.64  | 0.000289 | 0.00944  |
| GI_34996490-S | TMEM219  | 18 | 0.103   | 0.00236  | 3.63  | 0.000291 | 0.00948  |
| GI_26787987-S | MICB     | 18 | 0.103   | 0.00202  | 3.63  | 0.000291 | 0.00949  |
| GI_39995085-S | SLC8B1   | 18 | -0.103  | -0.00245 | -3.62 | 0.000305 | 0.00986  |
| GI_40254958-S | ATG9A    | 18 | 0.102   | 0.00341  | 3.62  | 0.000307 | 0.00993  |
| GI_5174700-S  | STK10    | 18 | 0.103   | 0.00221  | 3.62  | 0.000308 | 0.00995  |
| GI_9951921-S  | CIB1     | 18 | 0.102   | 0.00303  | 3.60  | 0.000329 | 0.0105   |
| GI_24431972-S | CC2D1A   | 18 | 0.102   | 0.00286  | 3.60  | 0.000333 | 0.0106   |
| GI_14211539-S | MOV10    | 18 | 0.102   | 0.00233  | 3.60  | 0.000336 | 0.0107   |
| GI_31542324-S | CROT     | 18 | 0.102   | 0.00319  | 3.60  | 0.000336 | 0.0107   |
| GI_45504354-S | MUSTN1   | 18 | 0.102   | 0.00339  | 3.59  | 0.000348 | 0.0110   |
| GI_41350332-S | TBCD     | 18 | 0.101   | 0.00313  | 3.58  | 0.000362 | 0.0113   |
| GI_39573729-S | ---      | 18 | 0.101   | 0.00223  | 3.57  | 0.000369 | 0.0114   |
| GI_31742506-A | UPP1     | 18 | 0.101   | 0.00335  | 3.57  | 0.000377 | 0.0116   |
| GI_21361550-S | SLC4A2   | 18 | 0.101   | 0.00253  | 3.57  | 0.000377 | 0.0117   |
| GI_37555948-S | SLC9A8   | 18 | 0.101   | 0.00216  | 3.56  | 0.000381 | 0.0117   |
| GI_4504036-S  | GNA11    | 18 | -0.101  | -0.00312 | -3.56 | 0.000385 | 0.0118   |
| GI_37541022-S | ATG2A    | 18 | 0.101   | 0.00331  | 3.55  | 0.000395 | 0.0121   |
| GI_4755141-S  | INPPL1   | 18 | 0.101   | 0.00263  | 3.55  | 0.000397 | 0.0121   |
| GI_42544225-S | VPS18    | 18 | 0.101   | 0.00308  | 3.55  | 0.000402 | 0.0123   |
| GI_11141876-S | SIGIRR   | 18 | 0.100   | 0.00312  | 3.54  | 0.000421 | 0.0127   |
| GI_39930540-S | C9orf142 | 18 | 0.100   | 0.00299  | 3.52  | 0.000447 | 0.0133   |
| GI_4507996-S  | ZBTB17   | 18 | 0.100   | 0.00264  | 3.51  | 0.000462 | 0.0137   |
| GI_5901987-S  | WDR45    | 18 | 0.100   | 0.00193  | 3.50  | 0.000477 | 0.0141   |
| GI_8670549-S  | CYTH4    | 18 | 0.0993  | 0.00236  | 3.50  | 0.000484 | 0.0142   |
| GI_29725606-I | UNC45A   | 18 | 0.0988  | 0.00218  | 3.48  | 0.000524 | 0.0152   |
| GI_7019332-S  | NRBP1    | 18 | 0.0983  | 0.00224  | 3.46  | 0.000556 | 0.0160   |
| GI_33286441-S | BCORL1   | 18 | 0.0979  | 0.00322  | 3.45  | 0.000569 | 0.0163   |
| GI_5921998-A  | DYRK1B   | 18 | 0.0977  | 0.00294  | 3.45  | 0.000586 | 0.0166   |
| GI_7382489-S  | DGAT1    | 18 | 0.0979  | 0.00236  | 3.45  | 0.000587 | 0.0166   |
| GI_20336278-A | SLC26A6  | 18 | 0.0968  | 0.00233  | 3.41  | 0.000673 | 0.0185   |
| GI_31543298-S | PNPLA6   | 18 | 0.0965  | 0.00296  | 3.41  | 0.000682 | 0.0187   |
| GI_29743268-S | TBC1D25  | 18 | 0.0965  | 0.00221  | 3.40  | 0.000704 | 0.0193   |
| GI_4557478-A  | CLK3     | 18 | 0.0961  | 0.00207  | 3.38  | 0.000744 | 0.0200   |
| GI_4826947-S  | PRKX     | 18 | 0.0962  | 0.00173  | 3.37  | 0.000763 | 0.0204   |
| GI_34147725-A | SHC1     | 18 | 0.0969  | 0.00119  | 3.37  | 0.000778 | 0.0208   |
| GI_14917110-S | AP4M1    | 18 | 0.0955  | 0.00227  | 3.36  | 0.000800 | 0.0213   |
| GI_4885270-A  | ---      | 18 | 0.0947  | 0.00316  | 3.34  | 0.000859 | 0.0224   |
| GI_45505128-S | TAOK2    | 18 | 0.0947  | 0.00272  | 3.34  | 0.000867 | 0.0226   |
| GI_31543177-S | PRR14    | 18 | 0.0931  | 0.00174  | 3.27  | 0.001107 | 0.0274   |
| GI_38327637-S | CREB3    | 18 | 0.0927  | 0.00214  | 3.26  | 0.001141 | 0.0280   |
| GI_17017983-S | CDK9     | 18 | 0.0924  | 0.00200  | 3.25  | 0.001184 | 0.0288   |
| GI_20149644-S | SARS2    | 18 | -0.0918 | -0.00216 | -3.23 | 0.001269 | 0.0303   |
| GI_31541963-S | ASL      | 18 | 0.0914  | 0.00252  | 3.22  | 0.001306 | 0.0310   |
| GI_13899252-S | UCK1     | 18 | 0.0916  | 0.00173  | 3.22  | 0.001334 | 0.0315   |
| GI_24432005-S | RHBDF2   | 18 | 0.0913  | 0.00196  | 3.21  | 0.001358 | 0.0319   |
| GI_17865806-S | VPS4A    | 18 | 0.0906  | 0.00164  | 3.18  | 0.001515 | 0.0348   |
| GI_20544143-A | CSNK1D   | 18 | 0.0904  | 0.00169  | 3.17  | 0.001555 | 0.0356   |
| Hs.149165-S   | ---      | 18 | 0.0897  | 0.00287  | 3.16  | 0.001596 | 0.0364   |
| GI_42476168-S | PAF1     | 18 | 0.0892  | 0.00259  | 3.15  | 0.001698 | 0.0382   |
| GI_38146093-S | MED16    | 18 | 0.0891  | 0.00325  | 3.14  | 0.001714 | 0.0385   |
| GI_13375689-S | CORO7    | 18 | 0.0893  | 0.00211  | 3.14  | 0.001727 | 0.0387   |
| GI_4759179-A  | STK19    | 18 | 0.0891  | 0.00187  | 3.13  | 0.001792 | 0.0397   |
| GI_39930532-S | PPM1J    | 18 | -0.0886 | -0.00281 | -3.12 | 0.001832 | 0.0404   |
| GI_37547065-S | CC2D1B   | 18 | 0.0874  | 0.00294  | 3.08  | 0.002103 | 0.0450   |
| GI_13994299-S | TMEM120A | 18 | 0.0873  | 0.00235  | 3.08  | 0.002149 | 0.0457   |
| GI_14141169-S | MTA2     | 18 | 0.0877  | 0.00162  | 3.08  | 0.002148 | 0.0457   |
| GI_13129143-S | NDUFAF5  | 18 | 0.0870  | 0.00332  | 3.07  | 0.002198 | 0.0466   |
| GI_38045930-S | RNF122   | 18 | 0.0866  | 0.00281  | 3.05  | 0.002316 | 0.0485   |
| GI_33519471-S | NDUFB7   | 18 | 0.0872  | 0.00139  | 3.05  | 0.002328 | 0.0486   |
| GI_31542869-S | GZMH     | 19 | 0.345   | 0.0223   | 12.9  | 6.49E-36 | 3.84E-32 |
| GI_21687176-S | RASGEF1A | 19 | 0.284   | 0.00877  | 10.4  | 2.08E-24 | 3.40E-21 |
| GI_29729547-S | ---      | 19 | 0.269   | 0.0107   | 9.80  | 6.57E-22 | 7.66E-19 |
| GI_22538469-S | EOMES    | 19 | 0.260   | 0.0113   | 9.48  | 1.26E-20 | 1.19E-17 |
| GI_40788019-S | C1orf21  | 19 | 0.252   | 0.00960  | 9.14  | 2.55E-19 | 2.11E-16 |
| GI_29336036-S | PDZD4    | 19 | 0.242   | 0.0117   | 8.79  | 5.09E-18 | 3.44E-15 |
| GI_30149753-S | LGR6     | 19 | 0.238   | 0.0102   | 8.63  | 1.87E-17 | 1.19E-14 |
| GI_41327713-S | APMAP    | 19 | 0.239   | 0.00554  | 8.62  | 2.04E-17 | 1.28E-14 |
| GI_41584199-S | GPR56    | 19 | 0.232   | 0.0129   | 8.40  | 1.18E-16 | 6.79E-14 |
| GI_4758679-S  | LLGL2    | 19 | 0.228   | 0.00932  | 8.24  | 4.18E-16 | 2.20E-13 |
| GI_34147563-S | SLC1A7   | 19 | 0.221   | 0.0190   | 7.99  | 3.04E-15 | 1.42E-12 |
| GI_33946290-S | LPCAT1   | 19 | 0.222   | 0.00543  | 7.99  | 3.01E-15 | 1.42E-12 |
| GI_8923627-S  | TTC38    | 19 | 0.216   | 0.00739  | 7.77  | 1.60E-14 | 6.29E-12 |
| GI_20127481-S | NKG7     | 19 | 0.212   | 0.0106   | 7.65  | 4.15E-14 | 1.50E-11 |
| GI_7108345-I  | GNLY     | 19 | 0.208   | 0.0102   | 7.46  | 1.60E-13 | 5.40E-11 |
| GI_24475870-S | GPR114   | 19 | 0.207   | 0.00616  | 7.44  | 1.94E-13 | 6.37E-11 |
| GI_38788121-S | PRSS23   | 19 | 0.206   | 0.0152   | 7.41  | 2.35E-13 | 7.57E-11 |

|               |           |    |         |          |       |          |          |
|---------------|-----------|----|---------|----------|-------|----------|----------|
| GI_20302138-S | CST7      | 19 | 0.205   | 0.0110   | 7.38  | 2.90E-13 | 9.14E-11 |
| GI_45446739-S | ABCA2     | 19 | 0.200   | 0.00927  | 7.18  | 1.20E-12 | 3.34E-10 |
| GI_27484425-S | SYTL3     | 19 | 0.200   | 0.00642  | 7.16  | 1.41E-12 | 3.83E-10 |
| GI_15451788-S | PDGFRB    | 19 | 0.199   | 0.0196   | 7.15  | 1.43E-12 | 3.85E-10 |
| GI_31543022-S | FGFBP2    | 19 | 0.199   | 0.0113   | 7.14  | 1.59E-12 | 4.18E-10 |
| GI_15718673-S | ADRB2     | 19 | 0.195   | 0.00763  | 6.98  | 4.79E-12 | 1.16E-09 |
| GI_18079322-S | GAB3      | 19 | 0.192   | 0.00606  | 6.87  | 1.01E-11 | 2.32E-09 |
| GI_39930402-S | LGR6      | 19 | 0.191   | 0.0104   | 6.86  | 1.11E-11 | 2.50E-09 |
| GI_32698959-S | LINC00469 | 19 | 0.188   | 0.0119   | 6.74  | 2.39E-11 | 5.17E-09 |
| GI_16506819-S | COLGALT2  | 19 | 0.187   | 0.00944  | 6.70  | 3.19E-11 | 6.73E-09 |
| GI_32307116-A | PPP2R2B   | 19 | 0.184   | 0.0122   | 6.59  | 6.47E-11 | 1.24E-08 |
| GI_4507470-S  | TGFBR3    | 19 | 0.184   | 0.00887  | 6.57  | 7.48E-11 | 1.42E-08 |
| GI_22035608-A | OSBPL5    | 19 | 0.175   | 0.00811  | 6.25  | 5.64E-10 | 8.80E-08 |
| GI_42656914-S | DTHD1     | 19 | 0.173   | 0.00999  | 6.19  | 7.96E-10 | 1.21E-07 |
| GI_24429585-S | ---       | 19 | 0.173   | 0.00809  | 6.18  | 8.72E-10 | 1.30E-07 |
| GI_7108343-A  | GNLY      | 19 | 0.172   | 0.0102   | 6.13  | 1.19E-09 | 1.74E-07 |
| GI_22748812-S | FCRLB     | 19 | 0.170   | 0.00538  | 6.05  | 1.96E-09 | 2.81E-07 |
| GI_38372914-S | EVA1C     | 19 | 0.168   | 0.00709  | 6.00  | 2.57E-09 | 3.57E-07 |
| GI_38505192-S | PTGDS     | 19 | 0.167   | 0.0108   | 5.95  | 3.40E-09 | 4.55E-07 |
| GI_37542486-S | TSEN54    | 19 | 0.164   | 0.00470  | 5.84  | 6.50E-09 | 8.19E-07 |
| GI_38016906-A | STOM      | 19 | 0.162   | 0.00564  | 5.76  | 1.09E-08 | 1.32E-06 |
| GI_25777679-A | RASSF1    | 19 | 0.160   | 0.00467  | 5.69  | 1.55E-08 | 1.82E-06 |
| GI_18141314-S | S1PR5     | 19 | 0.154   | 0.00881  | 5.47  | 5.36E-08 | 5.64E-06 |
| GI_31543620-S | SH2D2A    | 19 | 0.151   | 0.00699  | 5.38  | 9.07E-08 | 9.09E-06 |
| GI_37539470-S | DTHD1     | 19 | 0.151   | 0.00828  | 5.36  | 9.68E-08 | 9.59E-06 |
| GI_18860909-A | SNTB2     | 19 | 0.150   | 0.00425  | 5.32  | 1.24E-07 | 1.19E-05 |
| GI_38202210-S | GNPTAB    | 19 | 0.145   | 0.00322  | 5.12  | 3.54E-07 | 3.04E-05 |
| GI_7108343-I  | GNLY      | 19 | 0.143   | 0.00853  | 5.10  | 3.98E-07 | 3.38E-05 |
| GI_15451920-A | PDGFD     | 19 | 0.140   | 0.00664  | 4.98  | 7.35E-07 | 5.82E-05 |
| GI_6996012-S  | GZMA      | 19 | 0.138   | 0.00739  | 4.91  | 1.03E-06 | 7.80E-05 |
| GI_4757917-S  | RUNX3     | 19 | 0.137   | 0.00579  | 4.84  | 1.43E-06 | 0.000103 |
| GI_21955169-I | SSBP3     | 19 | 0.137   | 0.00352  | 4.84  | 1.43E-06 | 0.000103 |
| GI_32483414-S | GZMB      | 19 | 0.136   | 0.00775  | 4.84  | 1.46E-06 | 0.000105 |
| GI_19923571-S | SLAMF7    | 19 | 0.136   | 0.00528  | 4.83  | 1.51E-06 | 0.000108 |
| GI_19913391-A | RGS3      | 19 | 0.136   | 0.00367  | 4.82  | 1.64E-06 | 0.000115 |
| GI_7706528-S  | CD244     | 19 | 0.135   | 0.00370  | 4.80  | 1.81E-06 | 0.000126 |
| GI_7669497-I  | KLRD1     | 19 | 0.134   | 0.00643  | 4.74  | 2.36E-06 | 0.000159 |
| GI_14249307-S | PYROXD2   | 19 | 0.133   | 0.00428  | 4.73  | 2.51E-06 | 0.000169 |
| GI_4759139-S  | SLC9A3R1  | 19 | 0.129   | 0.00570  | 4.57  | 5.44E-06 | 0.000334 |
| GI_4758955-S  | BZRAP1    | 19 | 0.128   | 0.00479  | 4.53  | 6.59E-06 | 0.000399 |
| GI_23110963-S | CTSW      | 19 | 0.126   | 0.00596  | 4.47  | 8.47E-06 | 0.000503 |
| GI_21618332-S | STAT4     | 19 | 0.124   | 0.00351  | 4.39  | 1.25E-05 | 0.000706 |
| GI_21450843-A | MATK      | 19 | 0.124   | 0.00466  | 4.38  | 1.30E-05 | 0.000731 |
| GI_42734326-S | RAP1GAP2  | 19 | 0.122   | 0.00449  | 4.33  | 1.63E-05 | 0.000887 |
| GI_31341948-S | PRSS30P   | 19 | 0.122   | 0.00673  | 4.32  | 1.67E-05 | 0.000899 |
| Hs.147489-S   | ---       | 19 | 0.122   | 0.00699  | 4.31  | 1.78E-05 | 0.000951 |
| GI_4504878-S  | KLRB1     | 19 | -0.117  | -0.00649 | -4.13 | 3.90E-05 | 0.00180  |
| GI_40549458-S | YPEL1     | 19 | 0.115   | 0.00511  | 4.07  | 5.01E-05 | 0.00223  |
| GI_17402874-I | COL6A2    | 19 | 0.114   | 0.00526  | 4.05  | 5.43E-05 | 0.00238  |
| GI_32130537-S | CD7       | 19 | -0.114  | -0.00506 | -4.05 | 5.46E-05 | 0.00239  |
| GI_37551990-S | SIGLEC17P | 19 | 0.113   | 0.00496  | 3.99  | 7.12E-05 | 0.00299  |
| GI_40254807-S | PRF1      | 19 | 0.112   | 0.00646  | 3.96  | 7.87E-05 | 0.00325  |
| GI_34147599-S | CD99      | 19 | 0.110   | 0.00297  | 3.87  | 0.000115 | 0.00442  |
| GI_11968153-S | KIR2DL5A  | 19 | 0.105   | 0.00735  | 3.73  | 0.000202 | 0.00701  |
| GI_31343330-S | RAB37     | 19 | 0.104   | 0.00256  | 3.68  | 0.000245 | 0.00828  |
| GI_5902003-S  | MMP23B    | 19 | 0.104   | 0.00410  | 3.66  | 0.000258 | 0.00860  |
| GI_18604602-S | NCAM1     | 19 | 0.102   | 0.00462  | 3.59  | 0.000346 | 0.0109   |
| GI_7019440-S  | KIR3DL1   | 19 | 0.101   | 0.00635  | 3.56  | 0.000390 | 0.0120   |
| GI_28466996-S | DLG5      | 19 | 0.0994  | 0.00535  | 3.51  | 0.000459 | 0.0136   |
| GI_7657272-S  | KIR2DL2   | 19 | 0.0979  | 0.00615  | 3.46  | 0.000553 | 0.0159   |
| GI_29171679-S | CXCR1     | 19 | 0.0974  | 0.00977  | 3.45  | 0.000587 | 0.0166   |
| GI_7705573-S  | KLRF1     | 19 | 0.0965  | 0.00491  | 3.41  | 0.000671 | 0.0185   |
| GI_21264586-A | HOPX      | 19 | 0.0936  | 0.00579  | 3.31  | 0.000965 | 0.0246   |
| GI_38505191-S | PTGDR     | 19 | 0.0904  | 0.00585  | 3.19  | 0.001435 | 0.0334   |
| GI_27477087-S | IL18RAP   | 19 | -0.0879 | -0.00456 | -3.11 | 0.001941 | 0.0423   |
| GI_23592225-S | KIR3DL3   | 19 | 0.0875  | 0.0174   | 3.09  | 0.002030 | 0.0439   |
| GI_4506344-S  | PXN       | 19 | 0.0875  | 0.00201  | 3.08  | 0.002139 | 0.0456   |
| GI_6031164-S  | F2R       | 20 | 0.209   | 0.0113   | 7.50  | 1.18E-13 | 4.12E-11 |
| GI_19923320-S | KIFC3     | 20 | 0.185   | 0.0284   | 6.62  | 5.35E-11 | 1.07E-08 |
| GI_17149840-A | FKBP1B    | 20 | 0.166   | 0.0148   | 5.92  | 4.23E-09 | 5.59E-07 |
| GI_13376724-S | CCDC92    | 20 | 0.143   | 0.00445  | 5.08  | 4.41E-07 | 3.67E-05 |
| GI_10938005-S | SLC10A3   | 20 | 0.138   | 0.00613  | 4.91  | 1.01E-06 | 7.72E-05 |
| GI_21464102-S | YWHAH     | 20 | 0.133   | 0.00409  | 4.72  | 2.57E-06 | 0.000172 |
| GI_34328914-A | CD151     | 20 | 0.127   | 0.00525  | 4.49  | 7.87E-06 | 0.000470 |
| GI_13027798-S | MMP1      | 20 | 0.123   | 0.0203   | 4.36  | 1.40E-05 | 0.000775 |
| GI_5031940-S  | NFIB      | 20 | 0.121   | 0.00873  | 4.31  | 1.79E-05 | 0.000951 |
| GI_45505152-S | NCKAP1    | 20 | 0.121   | 0.00630  | 4.29  | 1.89E-05 | 0.00100  |
| GI_9955969-A  | ABCC3     | 20 | 0.120   | 0.00767  | 4.26  | 2.24E-05 | 0.00114  |
| GI_11761623-I | ST7       | 20 | 0.119   | 0.00394  | 4.20  | 2.85E-05 | 0.00140  |
| GI_41152089-S | PDZK1IP1  | 20 | 0.117   | 0.0116   | 4.16  | 3.34E-05 | 0.00159  |
| GI_41393552-S | MGLL      | 20 | 0.117   | 0.00602  | 4.14  | 3.76E-05 | 0.00175  |
| GI_21237762-S | CD9       | 20 | 0.117   | 0.00625  | 4.13  | 3.81E-05 | 0.00177  |
| GI_6552326-A  | CYB5R3    | 20 | 0.116   | 0.00396  | 4.10  | 4.36E-05 | 0.00198  |
| GI_15451935-I | CDC14B    | 20 | 0.114   | 0.00891  | 4.05  | 5.53E-05 | 0.00242  |
| GI_12025669-S | ACTN1     | 20 | -0.113  | -0.00518 | -4.01 | 6.51E-05 | 0.00279  |
| GI_16753232-S | TLN1      | 20 | 0.113   | 0.00359  | 4.00  | 6.63E-05 | 0.00282  |
| GI_20070329-S | ZFYVE21   | 20 | 0.112   | 0.00386  | 3.97  | 7.67E-05 | 0.00318  |

|               |         |    |         |          |       |          |         |
|---------------|---------|----|---------|----------|-------|----------|---------|
| GI_41872613-S | CXCL5   | 20 | 0.112   | 0.00915  | 3.95  | 8.13E-05 | 0.00333 |
| GI_4506116-S  | PROS1   | 20 | 0.107   | 0.0103   | 3.80  | 0.000151 | 0.00552 |
| GI_4759181-S  | STX1A   | 20 | 0.108   | 0.00446  | 3.80  | 0.000151 | 0.00552 |
| GI_31342330-S | TREML1  | 20 | 0.105   | 0.00606  | 3.73  | 0.000199 | 0.00694 |
| GI_19923444-A | ATL1    | 20 | 0.105   | 0.00631  | 3.71  | 0.000213 | 0.00734 |
| GI_6006009-S  | ITGA2B  | 20 | 0.104   | 0.00807  | 3.69  | 0.000232 | 0.00790 |
| GI_20336333-A | BCL2L1  | 20 | 0.104   | 0.00376  | 3.67  | 0.000254 | 0.00852 |
| GI_31563525-S | SLC24A3 | 20 | 0.101   | 0.0158   | 3.58  | 0.000359 | 0.0112  |
| GI_24430131-S | WBP2    | 20 | 0.101   | 0.00375  | 3.56  | 0.000379 | 0.0117  |
| GI_38570041-S | CLDN5   | 20 | 0.101   | 0.00572  | 3.56  | 0.000391 | 0.0120  |
| GI_21237780-S | WASF3   | 20 | 0.0979  | 0.00943  | 3.46  | 0.000552 | 0.0159  |
| GI_29745993-S | ENDOD1  | 20 | 0.0976  | 0.00437  | 3.45  | 0.000581 | 0.0165  |
| GI_45269134-S | GP1BA   | 20 | 0.0973  | 0.00912  | 3.44  | 0.000595 | 0.0168  |
| GI_6031196-S  | SELP    | 20 | 0.0968  | 0.00742  | 3.42  | 0.000643 | 0.0179  |
| GI_4557676-S  | ITGB3   | 20 | 0.0967  | 0.00771  | 3.42  | 0.000646 | 0.0180  |
| GI_8922813-S  | TMEM140 | 20 | 0.0953  | 0.00402  | 3.37  | 0.000785 | 0.0209  |
| GI_42657580-S | CASC15  | 20 | -0.0935 | -0.0129  | -3.31 | 0.000969 | 0.0246  |
| GI_31543081-S | MARCH2  | 20 | 0.0929  | 0.00311  | 3.28  | 0.001080 | 0.0268  |
| GI_34147679-S | TGFB11  | 20 | 0.0924  | 0.0152   | 3.27  | 0.001117 | 0.0275  |
| GI_24432051-S | SPOCD1  | 20 | 0.0919  | 0.0154   | 3.25  | 0.001192 | 0.0289  |
| GI_11184225-S | RGS10   | 20 | -0.0917 | -0.00236 | -3.23 | 0.001278 | 0.0305  |
| GI_4507356-S  | TAGLN2  | 20 | 0.0912  | 0.00452  | 3.22  | 0.001310 | 0.0310  |
| GI_31563523-A | MYL9    | 20 | 0.0888  | 0.0114   | 3.14  | 0.001734 | 0.0388  |
| GI_11761623-A | ST7     | 20 | 0.0889  | 0.00362  | 3.14  | 0.001734 | 0.0388  |
| GI_14456712-S | HBQ1    | 20 | 0.0881  | 0.00825  | 3.12  | 0.001881 | 0.0413  |
| GI_13775195-S | TSPAN9  | 20 | 0.0863  | 0.00605  | 3.05  | 0.002355 | 0.0490  |

List of 2,285 transcript identified in the SAFHS dataset for which their expression is significantly correlated to chronological age (moderated t-test: adjusted  $p \leq 0.05$ ). 1,143 transcripts were positively correlated to increase in age (red) and 1,142 transcripts negatively correlated to age (blue). For each transcript, its probeset identifier, its HUGO gene symbol and its association with age are given. The membership of the transcript in the twenty modules (M1 to M20) forming the BioAge is indicated in the column 'Module'.

Supplementary Table 3b. Pathway enrichment analysis in the twenty BioAge modules

| Module 1                                                                      | Ratio  | nominal p-value | adjusted p-value | Intersect                                          |
|-------------------------------------------------------------------------------|--------|-----------------|------------------|----------------------------------------------------|
| Pathway                                                                       |        |                 |                  |                                                    |
| B-cell Signaling                                                              |        |                 |                  |                                                    |
| B_CELL_DEVELOPMENT                                                            | 0.125  | 4.37E-06        | 0.00162          | HLA-DQB1,CD79A,CD19,CD79B                          |
| ALTERED_T_CELL_AND_B_CELL_SIGNALING_IN_RHEUMATOID_ARTHRITIS                   | 0.0595 | 9.77E-06        | 0.00162          | TNFRSF17,HLA-DQB1,TNFRSF13B,CD79A,CD79B            |
| PRIMARY_IMMUNODEFICIENCY_SIGNALING                                            | 0.0851 | 2.06E-05        | 0.00289          | KLHL1,TNFRSF13B,CD79A,CD19                         |
| PI3K_SIGNALING_IN_B_LYMPHOCYTES                                               | 0.0296 | 0.00126         | 0.117            | CD79A,BLKB,CD19,CD79B                              |
| B_CELL_RECEPTOR_SIGNALING                                                     | 0.0274 | 0.00169         | 0.125            | CD22,CD79A,CD19,CD79B                              |
| ROLE_OF_IL6T_IN_REGULATION_OF_THE_IMMUNE_RESPONSE                             | 0.0209 | 0.00449         | 0.278            | HLA-DQB1,CD79A,GN37,CD79B                          |
| APRIL_MEDIATED_SIGNALING                                                      | 0.0500 | 0.00910         | 0.354            | TNFRSF17,TNFRSF13B                                 |
| PTK56_SIGNALING                                                               | 0.0244 | 0.00955         | 0.354            | CD79A,CD19,CD79B                                   |
| SYSTEMIC_LUPUS_ERYTHEMATOSUS_SIGNALING                                        | 0.0244 | 0.00955         | 0.354            | CD22,CD79A,CD79B                                   |
| B_CELL_ACTIVATING_FACTOR_SIGNALING                                            | 0.0476 | 0.0100          | 0.354            | TNFRSF17,TNFRSF13B                                 |
| FCGMAR18B_SIGNALING_IN_B_LYMPHOCYTES                                          | 0.0253 | 0.0100          | 0.683            | CD79A,CD79B                                        |
| COMMUNICATION_BETWEEN_INNATE_AND_ADAPTIVE_IMMUNE_CELLS                        | 0.0235 | 0.00378         | 0.725            | TNFRSF17,TNFRSF13B                                 |
| Cell Signal Transduction by Transcription Factors                             |        |                 |                  |                                                    |
| THYROID_CANCER_SIGNALING                                                      | 0.0465 | 0.0105          | 0.354            | TCF4,TCF3                                          |
| OVARIAN_CANCER_SIGNALING                                                      | 0.0201 | 0.0160          | 0.497            | TCF4,E2F5,TCF3                                     |
| HUMAN_EMBRYONIC_STEM_CELL_PLURIPOTENCY                                        | 0.0164 | 0.0204          | 0.577            | TCF4,GN37,TCF3                                     |
| WNT_BETA_CATENIN_SIGNALING                                                    | 0.0180 | 0.0217          | 0.577            | TCF4,TLF1,TCF3                                     |
| BASAL_CELL_CARCINOMA_SIGNALING                                                | 0.0286 | 0.0284          | 0.655            | TCF4,TCF3                                          |
| ROLE_OF_ILMYT_ORF_KBETA_1_SIGNALING_IN_THE_PATHOGENESIS_OF_INFLUENZA          | 0.0267 | 0.0300          | 0.683            | TCF4,TCF3                                          |
| ACUTE_MYELOID_LEUKEMIA_SIGNALING                                              | 0.0253 | 0.0330          | 0.683            | TCF4,TCF3                                          |
| FACTORS_PROMOTING_CARDIOGENESIS_IN_VERTEBRATES                                | 0.0227 | 0.0402          | 0.725            | TCF4,TCF3                                          |
| MOLECULAR_MECHANISMS_OF_CANCER                                                | 0.0109 | 0.0409          | 0.725            | TCF4,E2F5,GN37,TCF3                                |
| Module 2                                                                      |        |                 |                  |                                                    |
| Pathway                                                                       | Ratio  | nominal p-value | adjusted p-value | Intersect                                          |
| Phosphoric Ester Hydrolase                                                    |        |                 |                  |                                                    |
| GRANZYME_A_SIGNALING                                                          | 0.118  | 0.00693         | 0.860            | APEX1,SET                                          |
| AMINOGLUCARIN_METABOLISM                                                      | 0.0441 | 0.0140          | 1.00             | APEX1,PDE3B,POE7A                                  |
| RELAXIN_SIGNALING                                                             | 0.0252 | 0.0186          | 1.00             | APEX1,PDE3B,RN3,PDE7A                              |
| Valine Catabolic Pathway                                                      |        |                 |                  |                                                    |
| VALINE_LEUCINE_AND_ISOLEUCINE_DEGRADATION                                     | 0.0667 | 0.009676        | 0.182            | KCEE,HACH,BCKDHB,ALDH8A1                           |
| INDOSTOL_METABOLISM                                                           | 0.200  | 0.0369          | 1.00             | ALDH8A1                                            |
| Others                                                                        |        |                 |                  |                                                    |
| PURINE_METABOLISM                                                             | 0.0307 | 0.005981        | 0.182            | PAICS,PPAT,PDE3B,POE7A,KATNA1,BCKDHB,ATP8V1G1,CLPX |
| AMINOPHOSPHONATE_METABOLISM                                                   | 0.0909 | 0.0115          | 1.00             | BCKDHB,PIGN                                        |
| GLUTAMATE_METABOLISM                                                          | 0.0571 | 0.0279          | 1.00             | ALDH8A1,PPAT                                       |
| Module 3                                                                      |        |                 |                  |                                                    |
| Pathway                                                                       | Ratio  | nominal p-value | adjusted p-value | Intersect                                          |
| MYC/LEFT Signaling                                                            |        |                 |                  |                                                    |
| ROLE_OF_MACROPHAGES_FIBROBLASTS_AND_ENDOTHELIAL_CELLS_IN_RHEUMATOID_ARTHRITIS | 0.0243 | 0.00373         | 0.974            | LEF1,IL16,MYC,TRAF5,CAMK4,LTB,PRKCA                |
| PROTEIN_KINASE_A_SIGNALING                                                    | 0.0195 | 0.0158          | 0.974            | PDE6A,FLNB,LEF1,PDE6B,CAMK4,PRKCA                  |
| GLOBLASTOMA_MULTIFORME_SIGNALING                                              | 0.0268 | 0.0173          | 0.974            | LEF1,IGF1R,MYC,FOXO1                               |
| SMALL_CELL_LUNG_CANCER_SIGNALING                                              | 0.0318 | 0.0250          | 0.974            | MYC,TRAF5,FRIT                                     |
| THYROID_CANCER_SIGNALING                                                      | 0.0465 | 0.0337          | 0.974            | LEF1,MYC                                           |
| GLIOMA_SIGNALING                                                              | 0.0275 | 0.0366          | 0.974            | LEF1,CAMK4,PRKCA                                   |
| ENDOMETRIAL_CANCER_SIGNALING                                                  | 0.0385 | 0.0477          | 0.974            | LEF1,MYC                                           |
| Others                                                                        |        |                 |                  |                                                    |
| RHOA_SIGNALING                                                                | 0.0370 | 0.00074         | 0.974            | IGF1R,RAPGEF,SEPT6,EPHA1                           |
| ALTERED_T_CELL_AND_B_CELL_SIGNALING_IN_RHEUMATOID_ARTHRITIS                   | 0.0357 | 0.0186          | 0.974            | L23A,CD28,LTB                                      |
| T_CELL_RECEPTOR_SIGNALING                                                     | 0.0294 | 0.0369          | 0.974            | TN3,CAMK4,CD28                                     |
| CROSSTALK_BETWEEN_ENDOCRINE_CELLS_AND_NATURAL_KILLER_CELLS                    | 0.0286 | 0.0332          | 0.974            | CCR7,CD28,LTB                                      |
| Module 4                                                                      |        |                 |                  |                                                    |
| Pathway                                                                       | Ratio  | nominal p-value | adjusted p-value | Intersect                                          |
| Cellular Metabolism                                                           |        |                 |                  |                                                    |
| BETA-ALANINE_METABOLISM                                                       | 0.0435 | 0.00667         | 1.00             | HIBCH,ACADM                                        |
| PROPANOATE_METABOLISM                                                         | 0.0357 | 0.0127          | 1.00             | HIBCH,ACADM                                        |
| VALINE_LEUCINE_AND_ISOLEUCINE_DEGRADATION                                     | 0.0145 | 0.0333          | 1.00             | HIBCH,ACADM                                        |
| FATTY_ACID_METABOLISM                                                         | 0.0194 | 0.0397          | 1.00             | ACSL5,ACADM                                        |
| Cell Growth Regulation                                                        |        |                 |                  |                                                    |
| EPF2_SIGNALING                                                                | 0.0238 | 0.0273          | 1.00             | ATM,EPF252                                         |
| VEGF_SIGNALING                                                                | 0.0235 | 0.0279          | 1.00             | ATM,EPF252                                         |
| TR_ROR_ACTIVATION                                                             | 0.0230 | 0.0285          | 1.00             | ATM,TBL1YR1                                        |
| PS1_SIGNALING                                                                 | 0.0215 | 0.0329          | 1.00             | ATM,GNL3                                           |
| DNA_DOUBLE-STRAND_BREAK_REPAIR_BY_HOMOLOGOUS_RECOMBINATION                    | 0.0667 | 0.0456          | 1.00             | ATM                                                |
| DNA_DOUBLE-STRAND_BREAK_REPAIR_BY_NONHOMOLOGOUS_END_JOINING                   | 0.0667 | 0.0456          | 1.00             | ATM                                                |
| Others                                                                        |        |                 |                  |                                                    |
| CLEAVAGE_AND_POLYADENYLATION_OF_PRE-MRNA                                      | 0.0167 | 0.00568         | 0.219            | MOR31,CPSE3                                        |
| AMINOACYL-TRNA_BIOSYNTHESIS                                                   | 0.0571 | 0.00509         | 0.946            | ARS,EPRS                                           |
| VALINE_LEUCINE_AND_ISOLEUCINE_BIOSYNTHESIS                                    | 0.0909 | 0.0337          | 1.00             | ARS                                                |
| Module 5                                                                      |        |                 |                  |                                                    |
| Pathway                                                                       | Ratio  | nominal p-value | adjusted p-value | Intersect                                          |
| PS1_SIGNALING                                                                 | 0.0323 | 0.00323         | 1.00             | COKA,PLAUG1,BIRT1                                  |
| Module 6                                                                      |        |                 |                  |                                                    |
| Pathway                                                                       | Ratio  | nominal p-value | adjusted p-value | Intersect                                          |
| Toll Receptor Signaling                                                       |        |                 |                  |                                                    |
| TWEAK_SIGNALING                                                               | 0.0833 | 0.00103         | 0.203            | TRADD,TNFRSF25,TRAF1                               |
| ROLE_OF_MACROPHAGES_FIBROBLASTS_AND_ENDOTHELIAL_CELLS_IN_RHEUMATOID_ARTHRITIS | 0.0208 | 0.00486         | 0.465            | TCF7,PLC1,TRADD,TRAF1,PK3CD,PLCG1                  |
| MACROPHAGE_TOSIS_SIGNALING                                                    | 0.0435 | 0.00693         | 0.465            | TGFB7,PK3CD,PLCG1                                  |
| LEPTIN_SIGNALING_IN_OBESITY                                                   | 0.0417 | 0.00763         | 0.465            | PLC1,PK3CD,PLCG1                                   |
| PROLACTIN_SIGNALING                                                           | 0.0411 | 0.00763         | 0.465            | TCF7,PK3CD,PLCG1                                   |
| HER2_SIGNALING_IN_BREAST_CANCER                                               | 0.0395 | 0.00875         | 0.465            | TGFB7,PK3CD,PLCG1                                  |
| VIRUS_ENTRY_VIA_ENDOCYTIC_PATHWAYS                                            | 0.0337 | 0.0134          | 0.536            | TGFB7,PK3CD,PLCG1                                  |
| CTL4_SIGNALING_IN_CYTOTOXIC_T_LYMPHOCYTES                                     | 0.0319 | 0.0134          | 0.536            | PK3CD,PLCG1,ZAP70                                  |
| HMBG1_SIGNALING                                                               | 0.0316 | 0.0160          | 0.536            | KAT5A,PK3CD,AGER                                   |
| NEUROPTIC_PAIN_SIGNALING_IN_DORSAL_HORN_NEURONS                               | 0.0303 | 0.0179          | 0.536            | PK3CD,PLCG1                                        |
| T_CELL_RECEPTOR_SIGNALING                                                     | 0.0280 | 0.0219          | 0.536            | PK3CD,PLCG1,ZAP70                                  |
| SPHINGOSINE-1-PHOSPHATE_SIGNALING                                             | 0.0275 | 0.0220          | 0.536            | TGFB7,PK3CD,PLCG1                                  |
| FAK_SIGNALING                                                                 | 0.0270 | 0.0242          | 0.536            | PK3CD,PLCG1,ZAP70                                  |
| ICOS-ICOS_SIGNALING_IN_T_HELPER_CELLS                                         | 0.0270 | 0.0242          | 0.536            | PK3CD,PLCG1,ZAP70                                  |
| NATURAL_KILLER_CELL_SIGNALING                                                 | 0.0270 | 0.0242          | 0.536            | PK3CD,PLCG1,ZAP70                                  |
| 14-3-3-MEDIATED_SIGNALING                                                     | 0.0263 | 0.0259          | 0.536            | PLC1,PK3CD,PLCG1                                   |
| EGF_SIGNALING                                                                 | 0.0435 | 0.0275          | 0.536            | PK3CD,PLCG1                                        |
| P2Y_PURINERGIC_RECEPTOR_SIGNALING_PATHWAY                                     | 0.0252 | 0.0289          | 0.536            | PLC1,PK3CD,PLCG1                                   |
| CD28_SIGNALING_IN_T_HELPER_CELLS                                              | 0.0248 | 0.0302          | 0.536            | PK3CD,PLCG1,ZAP70                                  |
| PTK56_SIGNALING                                                               | 0.0244 | 0.0315          | 0.536            | PLC1,PK3CD,PLCG1                                   |
| LYMPHOTOXIN_BETA_RECEPTOR_SIGNALING                                           | 0.0364 | 0.0383          | 0.536            | TGFB7,PK3CD                                        |
| THROMBOPOIETIN_SIGNALING                                                      | 0.0364 | 0.0383          | 0.536            | PK3CD,PLCG1                                        |
| INDOSTOL_PHOSPHATE_METABOLISM                                                 | 0.0226 | 0.0399          | 0.536            | PLC1,PK3CD,PLCG1                                   |
| PI3K_SIGNALING_IN_B_LYMPHOCYTES                                               | 0.0222 | 0.0399          | 0.536            | PLC1,PK3CD,PLCG1                                   |
| DEATH_RECEPTOR_SIGNALING                                                      | 0.0223 | 0.0476          | 0.536            | TRADD,TNFRSF25                                     |
| INDUCTION_OF_APOPTOSIS_BY_HIV1                                                | 0.0317 | 0.0490          | 0.536            | TRADD,TRAF1                                        |
| Others                                                                        |        |                 |                  |                                                    |
| ASSEMBLY_OF_RNA_POLYMERASE_II_COMPLEX                                         | 0.222  | 0.00109         | 0.203            | POLR1C,TAFC                                        |
| PYRIMIDINE_METABOLISM                                                         | 0.0222 | 0.0399          | 0.536            | POLR1C,POLD2,POLR3C                                |
| Module 7                                                                      |        |                 |                  |                                                    |
| Pathway                                                                       | Ratio  | nominal p-value | adjusted p-value | Intersect                                          |
| Protein Tyrosine Phosphatase                                                  |        |                 |                  |                                                    |
| RIBOFLAVIN_METABOLISM                                                         | 0.118  | 0.00403         | 0.0842           | DUSP18,PTPRJ                                       |
| FRUCTOSE_AND_MANNULOSE_METABOLISM                                             | 0.0465 | 0.00261         | 0.322            | DUSP18,PTPRJ                                       |
| AMINOGLUCARIN_METABOLISM                                                      | 0.0294 | 0.00842         | 0.987            | DUSP18,PTPRJ                                       |
| SPHINGOLIPID_METABOLISM                                                       | 0.0256 | 0.00838         | 0.623            | DUSP18,PTPRJ                                       |
| NICOTINATE_AND_NICOTINAMIDE_METABOLISM                                        | 0.0208 | 0.0125          | 0.775            | DUSP18,PTPRJ                                       |
| Others                                                                        |        |                 |                  |                                                    |
| CYANAMINO_ACID_METABOLISM                                                     | 0.111  | 0.00453         | 0.0842           | FAAH,ASRGL1                                        |
| Module 8                                                                      |        |                 |                  |                                                    |
| Pathway                                                                       | Ratio  | nominal p-value | adjusted p-value | Intersect                                          |
| Antiviral Responses                                                           |        |                 |                  |                                                    |
| ROLE_OF_RIG-I-LIKE_RECEPTORS_IN_ANTI-VIRAL_IMMUNITY                           | 0.0227 | 0.0318          | 1.00             | MAVS                                               |
| ACTIVATION_OF_RIF_BY_CYTOSOLIC_PATTERN_RECOGNITION_RECEPTORS                  | 0.0169 | 0.0463          | 1.00             | MAVS                                               |
| Module 9                                                                      |        |                 |                  |                                                    |
| Pathway                                                                       | Ratio  | nominal p-value | adjusted p-value | Intersect                                          |
| Fatty Acid Biosynthesis                                                       |        |                 |                  |                                                    |
| FATTY_ACID_BIOSYNTHESIS                                                       | 0.200  | 0.000654        | 0.141            | ACACA,FASN                                         |
| LXR_RXR_ACTIVATION                                                            | 0.0441 | 0.00389         | 0.361            | NFKB1,ACACA,FASN                                   |
| AMPK_SIGNALING                                                                | 0.0247 | 0.00864         | 0.458            | PP1A,ACACA,FASN,PRKAB1                             |
| TR_ROR_ACTIVATION                                                             | 0.0349 | 0.00750         | 0.458            | PP1A,ACACA,FASN                                    |
| PENTOSE_PHOSPHATE_PATHWAY                                                     | 0.0667 | 0.00870         | 0.458            | PP1A,ALDO                                          |
| FRUCTOSE_AND_MANNULOSE_METABOLISM                                             | 0.0465 | 0.0174          | 0.719            | PP1A,ALDO                                          |
| INDOSTOL_METABOLISM                                                           | 0.200  | 0.0235          | 0.875            | ALDO                                               |
| PYRUVATE_METABOLISM                                                           | 0.0328 | 0.0324          | 1.00             | HADHA,ACACA                                        |
| PARALPHA_RXRALPHA_ACTIVATION                                                  | 0.0169 | 0.0383          | 1.00             | NFKB1,FASN,PRKAB1                                  |
| Others                                                                        |        |                 |                  |                                                    |
| PYRIMIDINE_METABOLISM                                                         | 0.0370 | 0.000367        | 0.137            | NME1,PUS1,POLR1E,CTPS2,POLE3                       |
| PURINE_METABOLISM                                                             | 0.0230 | 0.00114         | 0.141            | NME1,IMPDH2,PFAS,ATPS1,POLR1E,POLE3                |
| UREA_CYCLE_AND_METABOLISM_OF_AMINO_GROUPS                                     | 0.0625 | 0.00886         | 0.458            | SRM,PCYCL                                          |
| POLYAMINE_REGULATION_IN_COLORECTAL_CANCER                                     | 0.0333 | 0.0324          | 1.00             | PCNBP,PSNDR                                        |
| ARGININE_AND_PROLINE_METABOLISM                                               | 0.0282 | 0.0441          | 1.00             | SRM,PCYCL                                          |
| Module 10                                                                     |        |                 |                  |                                                    |
| Pathway                                                                       | Ratio  | nominal p-value | adjusted p-value | Intersect                                          |
| Lysine-Tryptophan Metabolism                                                  |        |                 |                  |                                                    |
| TRYPTOPHAN_METABOLISM                                                         | 0.0273 | 0.0180          | 1.00             | GCDH,ALDH7A1,WAR2                                  |
| LYSINE_DEGRADATION                                                            | 0.0339 | 0.0161          | 1.00             | GCDH,ALDH7A1                                       |
| Others                                                                        |        |                 |                  |                                                    |
| MITOTIC_ROLES_OF_POLO-LIKE_KINASE                                             | 0.0517 | 0.00306         | 1.00             | PM1,KIF23,CDG20                                    |
| INTERFERON_SIGNALING                                                          | 0.0606 | 0.0121          | 1.00             | KAT1,IFIT1                                         |
| LXR_RXR_ACTIVATION                                                            | 0.0294 | 0.0467          | 1.00             | SCD,SREBF1                                         |
| Module 11                                                                     |        |                 |                  |                                                    |
| Pathway                                                                       | Ratio  | nominal p-value | adjusted p-value | Intersect                                          |
| Glycosphingolipid Biosynthesis                                                |        |                 |                  |                                                    |
| GLYCOSPHINGOLIPID_BIOSYNTHESIS_-_GLOBOSERIES                                  | 0.0662 | 0.0178          | 1.00             | B3GANT1,ST6SIA1                                    |
| GLYCOSPHINGOLIPID_BIOSYNTHESIS_-_GANGLOSERIES                                 | 0.0633 | 0.0200          | 1.00             | ST6SIA1,ST6T                                       |
| GLYCINE_SERINE_AND_THREONINE_METABOLISM                                       | 0.0448 | 0.0279          | 1.00             | PHGDH,GLDC,DBT                                     |
| Others                                                                        |        |                 |                  |                                                    |
| P2X2_ROR_ACTIVATION                                                           | 0.0441 | 0.0280          | 1.00             | AKT3,GSTM2,ABC89                                   |
| Module 12                                                                     |        |                 |                  |                                                    |
| Pathway                                                                       | Ratio  | nominal p-value | adjusted p-value | Intersect                                          |
| Actin-Based Cell Motility                                                     |        |                 |                  |                                                    |
| RHOA_SIGNALING                                                                | 0.0370 | 0.0124          | 1.00             | ACTA2,ACTA1,APPC2,TTN                              |
| CAVEOLAR-MEDIATED_ENDOCYTOSIS_SIGNALING                                       | 0.0417 | 0.0221          | 1.00             | ACTA2,ACTA1,HLA-B                                  |
| REGULATION_OF_ACTIN-BASED_MOTILITY_BY_RHO                                     | 0.0361 | 0.0320          | 1.00             | ACTA2,ACTA1,APPC2                                  |
| VEGF_SIGNALING                                                                | 0.0353 | 0.0340          | 1.00             | ACTA2,ACTA1,FLT4                                   |
| VIRUS_ENTRY_VIA_ENDOCYTIC_PATHWAYS                                            | 0.0337 | 0.0362          | 1.00             | ACTA2,ACTA1,HLA-B                                  |
| FCGMAR15_RECEPTOR-MEDIATED_PHAGOCYTOSIS_IN_MACROPHAGES_AND_MONOCYTES          | 0.0326 | 0.0326          | 1.00             | ACTA2,ACTA1,APPC2                                  |
| MECHANISMS_OF_VIRAL_EXIT_FROM_HOST_CELLS                                      | 0.0500 | 0.0440          | 1.00             | ACTA2,ACTA1                                        |

Legend  
Genes negatively correlated to age  
Genes positively correlated to age

|                                                                                                    |        |                 |                  |                                                           |
|----------------------------------------------------------------------------------------------------|--------|-----------------|------------------|-----------------------------------------------------------|
| Others                                                                                             |        |                 |                  |                                                           |
| C21-STEROID_HORMONE_METABOLISM                                                                     | 0.105  | 0.0108          | 1.00             | MSD3B7.EBP                                                |
| COMPLEMENT_SYSTEM                                                                                  | 0.0571 | 0.0345          | 1.00             | CFH.C1QC                                                  |
| NITROGEN_METABOLISM                                                                                | 0.0571 | 0.0345          | 1.00             | LOXL1.TGM2                                                |
| Module 13                                                                                          |        |                 |                  |                                                           |
| Pathway                                                                                            | Ratio  | nominal p-value | adjusted p-value | Intersect                                                 |
| RHOA_SIGNALING                                                                                     | 0.0278 | 0.0435          | 1.00             | ARPC4L.PIP4QC.SEPT8                                       |
| PRIMARY_IMMUNODEFICIENCY_SIGNALING                                                                 | 0.0426 | 0.0458          | 1.00             | ADA.TAP1                                                  |
| Module 14                                                                                          |        |                 |                  |                                                           |
| Pathway                                                                                            | Ratio  | nominal p-value | adjusted p-value | Intersect                                                 |
| Cell Motility                                                                                      |        |                 |                  |                                                           |
| REGULATION_OF_EIF4_AND_70S6K_SIGNALING                                                             | 0.0388 | 0.00316         | 0.637            | MAPK1.ITGB1.EIF4EBP2.EIF4EBP3.ITGB2                       |
| CD342_SIGNALING                                                                                    | 0.0316 | 0.00747         | 0.637            | MAPK1.ITGB1.HLA-E.MYL6.ITGB2                              |
| ACTIN_CYTOSKELETON_SIGNALING                                                                       | 0.0262 | 0.00836         | 0.637            | MAPK1.ITGB1.SSH1.TMSB10.MYL6.ITGB2                        |
| FAK_SIGNALING                                                                                      | 0.0264 | 0.0104          | 0.637            | MAPK1.ITGB1.MYL6.ITGB2                                    |
| LK_SIGNALING                                                                                       | 0.0276 | 0.0130          | 0.637            | MAPK1.ITGB1.TMSB10.MYL6.ITGB2                             |
| PHOSPHOLIPASE_C_SIGNALING                                                                          | 0.0233 | 0.0145          | 0.637            | MAPK1.ITGB1.GNG2.MYL6.HNNAK.ITGB2                         |
| LEUKOCYTE_EXTRAVASATION_SIGNALING                                                                  | 0.0207 | 0.0148          | 0.637            | MAPK1.ITGB1.CYBA.MYL6.ITGB2                               |
| AGRN_INTERACTIONS_AT_NEUROMUSCULAR_JUNCTION                                                        | 0.0448 | 0.0153          | 0.637            | MAPK1.ITGB1.ITGB2                                         |
| EPHRII_RECEPTOR_SIGNALING                                                                          | 0.0258 | 0.0171          | 0.637            | MAPK1.ITGB1.GNG2.ITGB2.SHD3C                              |
| INTEGRIN_SIGNALING                                                                                 | 0.0258 | 0.0171          | 0.637            | RAP2A.MAPK1.TSPAN2.ITGB1.ITGB2                            |
| NF-KAPPAB_ACTIVATION_BY_VIRUSES                                                                    | 0.0400 | 0.0206          | 0.687            | MAPK1.ITGB1.ITGB2                                         |
| INHIBITION_OF_ANGIOGENESIS_BY_TSP1                                                                 | 0.0505 | 0.0273          | 0.848            | MAPK1.CD47                                                |
| Module 15                                                                                          |        |                 |                  |                                                           |
| Pathway                                                                                            | Ratio  | nominal p-value | adjusted p-value | Intersect                                                 |
| Integrin Signaling                                                                                 |        |                 |                  |                                                           |
| INTEGRIN_SIGNALING                                                                                 | 0.0464 | 0.000373        | 0.102            | ITGAL.PPP1CA.ACT14.RAPGEF1.CAPN5.1.AKT1.CAPN1.ARPC4.ITGA5 |
| VIRUS_ENTRY_VIA_ENDOCYTIC_PATHWAYS                                                                 | 0.0674 | 0.000549        | 0.102            | FUNA.ITGAL.AP2B1.CLTB.AP2M1.ITGA5                         |
| REGULATION_OF_ACTIN-BASED_MOTILITY_BY_RHO                                                          | 0.0602 | 0.00269         | 0.333            | PPP1CA.PIP4QA.ARHG2A.ARPC4.PFN1                           |
| CTLA4_SIGNALING_IN_CYTOTOXIC_T_LYMPHOCYTES                                                         | 0.0532 | 0.00460         | 0.361            | PPP2R2B.AKT1.APCB1.CLTB.AP2M1                             |
| ACTIN_CYTOSKELETON_SIGNALING                                                                       | 0.0349 | 0.00485         | 0.361            | ITGAL.PPP1CA.ACT14.PIP4QA2.DIAPH1.ARPC4.PFN1.ITGA5        |
| FAK_SIGNALING                                                                                      | 0.0459 | 0.00687         | 0.459            | ITGAL.CAPN5.AKT1.CAPN1.ITGA5                              |
| CAVEOLAR-MEDIATED_ENDOCYTOSIS_SIGNALING                                                            | 0.0556 | 0.00665         | 0.459            | ITGAL.ITGAL.FLOT1.ITGA5                                   |
| ERK_MAPK_SIGNALING                                                                                 | 0.0335 | 0.0105          | 0.459            | ITGAL.PPP1CA.ELF4.RAPGEF1.PPP2R2B.ITGA5.SRF               |
| NF-KAPPAB_ACTIVATION_BY_VIRUSES                                                                    | 0.0533 | 0.0111          | 0.459            | ITGAL.AKT1.IKBKG.ITGA5                                    |
| HUNTINGTONS_DISEASE_SIGNALING                                                                      | 0.0324 | 0.0124          | 0.462            | CAPN5.AKT1.YTK1UBE2S.DCTN1.CTSD.CAPN1                     |
| PTEN_SIGNALING                                                                                     | 0.0380 | 0.0180          | 0.569            | ITGAL.ITGAL.FOXO4.IKBKG.ITGA5                             |
| AMYLLOID_PROCESSING                                                                                | 0.0600 | 0.0202          | 0.579            | CAPN5.1.AKT1.CAPN1                                        |
| PI3K_AKT_SIGNALING                                                                                 | 0.0360 | 0.0226          | 0.600            | ITGAL.PPP2R2B.AKT1.IKBKG.ITGA5                            |
| EPHRII_RECEPTOR_SIGNALING                                                                          | 0.0250 | 0.0250          | 0.620            | ITGAL.RAPGEF1.AKT1.AXIN1.ARPC4.ITGA5                      |
| CLATHRIN-MEDIATED_ENDOCYTOSIS_SIGNALING                                                            | 0.0318 | 0.0367          | 0.831            | AP2B1.CLTB.AP2M1.ARPC4.ITGA5                              |
| HYPOXIA_SIGNALING_IN_THE_CARDIOVASCULAR_SYSTEM                                                     | 0.0467 | 0.0369          | 0.887            | AKT1.UBE2S.CDC34                                          |
| ANGIOPOIETIN_SIGNALING                                                                             | 0.0448 | 0.0430          | 0.857            | AKT1.IKBKG.TNPI1                                          |
| Others                                                                                             |        |                 |                  |                                                           |
| CDK6_SIGNALING                                                                                     | 0.0460 | 0.0183          | 0.569            | PPP1CA.PPP2R2B.ADCY9.CAPN1                                |
| RAR_ACTIVATION                                                                                     | 0.0301 | 0.0438          | 0.857            | NCOA1.AKT1.2.BTB16.MAPKAPK2.ADCY9                         |
| Module 16                                                                                          |        |                 |                  |                                                           |
| Pathway                                                                                            | Ratio  | nominal p-value | adjusted p-value | Intersect                                                 |
| Inflammatory Responses                                                                             |        |                 |                  |                                                           |
| ACUTE_PHASE_RESPONSE_SIGNALING                                                                     | 0.0545 | 4.73E-06        | 0.00176          | C1QA.C1QB.HMOX1.C3.RRAS.TNFRSF18.MYD88.CEBPB.MRAS         |
| ROLE_OF_PATTERN_RECOGNITION_RECEPTORS_IN_RECOGNITION_OF_BACTERIA_AND_VIRUSES                       | 0.0789 | 2.72E-05        | 0.00927          | C1QA.C1QB.C1BY.HMOX1.C3AK1.IRF7                           |
| COMPLEMENT_SYSTEM                                                                                  | 0.114  | 0.000159        | 0.0197           | C1QA.C1QB.C3.C3AR1                                        |
| ONCOSTATIN_M_SIGNALING                                                                             | 0.0882 | 0.00244         | 0.227            | MT2A.RRAS.MRAS                                            |
| I_L3_SIGNALING                                                                                     | 0.0471 | 0.00458         | 0.316            | RRAS.TNFRSF18.CEBPB.MRAS                                  |
| CHOLECYSTOKININ_GASTRIN-MEDIATED_SIGNALING                                                         | 0.0444 | 0.00662         | 0.316            | RHOA.RRAS.MAPK7.MRAS                                      |
| FCGAMMA_RECEPTOR-MEDIATED_PHAGOCYTOSIS_IN_MACROPHAGES_AND_MONOCYTES                                | 0.0435 | 0.00667         | 0.316            | HMOX1.ARPC4.FOR.MAP7                                      |
| HMOX1_SIGNALING                                                                                    | 0.0421 | 0.00680         | 0.316            | RHOA.RRAS.TNFRSF18.MRAS                                   |
| ENDOTHELIN_1_SIGNALING                                                                             | 0.0305 | 0.00669         | 0.390            | HMOX1.CASP8.RRAS.MAPK7.MRAS                               |
| GLIOMA_INVASIVENESS_SIGNALING                                                                      | 0.0326 | 0.0105          | 0.390            | RHOA.RRAS.MRAS                                            |
| ERK5_SIGNALING                                                                                     | 0.0492 | 0.0126          | 0.408            | RRAS.MAPK7.MRAS                                           |
| ROLE_OF_AKT1_AND_IKKS_N_GAMMAC_CYTOKINE_SIGNALING                                                  | 0.0335 | 0.0132          | 0.408            | I.L15.RRAS.MRAS                                           |
| I_L15_SIGNALING                                                                                    | 0.0469 | 0.0144          | 0.411            | I.L15.RRAS.MRAS                                           |
| I_L4_SIGNALING                                                                                     | 0.0270 | 0.0156          | 0.414            | RHOA.HMOX1.RRAS.C57B.MRAS                                 |
| INTEGRIN_SIGNALING                                                                                 | 0.0258 | 0.0188          | 0.441            | RRAS.ARPC4.MRAS.VASP                                      |
| PROLACTIN_SIGNALING                                                                                | 0.0411 | 0.0204          | 0.441            | RRAS.CEBPB.MRAS                                           |
| I_L17_SIGNALING                                                                                    | 0.0211 | 0.0405          | 0.441            | RRAS.CEBPB.MRAS                                           |
| LPS_IL_1_MEDIATED_INHIBITION_OF_RXR_FUNCTION                                                       | 0.0245 | 0.0228          | 0.441            | SCAR81.CHS17.TNFRSF18.MYD88.SLC27A3                       |
| CERAMIDE_SIGNALING                                                                                 | 0.0375 | 0.0259          | 0.441            | TNFRSF18.MRAS                                             |
| NEF2-MEDIATED_OXIDATIVE_STRESS_RESPONSE                                                            | 0.0380 | 0.0227          | 0.441            | SCAR81.HMOX1.RRAS.MAPK7.MRAS                              |
| ROLE_OF_MACROPHAGES_FIBROBLASTS_AND_ENDOTHELIAL_CELLS_IN_RHEUMATOID_ARTHRITIS                      | 0.0208 | 0.0263          | 0.441            | I.L15.RRAS.TNFRSF18.MYD88.CEBPB.MRAS                      |
| PI3K_SIGNALING                                                                                     | 0.0286 | 0.0270          | 0.441            | RHOA.HMOX1.RRAS.MRAS                                      |
| MITOCHONDRIAL_FUNCTION                                                                             | 0.0366 | 0.0276          | 0.441            | RRAS.TNFRSF18.MRAS                                        |
| REGULATION_OF_ACTIN-BASED_MOTILITY_BY_RHO                                                          | 0.0261 | 0.0285          | 0.441            | RHOA.ARPC4.GSN                                            |
| NON-SMALL_CELL_LUNG_CANCER_SIGNALING                                                               | 0.0353 | 0.0353          | 0.441            | E2F2.RRAS.MRAS                                            |
| GLIOBLASTOMA_MULTIFORMIS_SIGNALING                                                                 | 0.0268 | 0.0308          | 0.441            | RHOA.E2F2.RRAS.MRAS                                       |
| GERM_CELL-SERTOLI_CELL_JUNCTION_SIGNALING                                                          | 0.0255 | 0.0363          | 0.475            | RHOA.RRAS.MRAS.GSN                                        |
| NF-KAPPAB_SIGNALING                                                                                | 0.0255 | 0.0363          | 0.475            | RRAS.TNFRSF18.MYD88.MRAS                                  |
| APOPTOSIS_SIGNALING                                                                                | 0.0326 | 0.0371          | 0.475            | RRAS.TNFRSF18.MRAS                                        |
| CHRONIC_HYPOXIC_LEUKEMIA_SIGNALING                                                                 | 0.0313 | 0.0413          | 0.512            | E2F2.RRAS.MRAS                                            |
| MELANOMA_SIGNALING                                                                                 | 0.0476 | 0.0444          | 0.512            | RRAS.MRAS                                                 |
| PROSTATE_CANCER_SIGNALING                                                                          | 0.0303 | 0.0445          | 0.512            | E2F2.RRAS.MRAS                                            |
| THYROID_CANCER_SIGNALING                                                                           | 0.0465 | 0.0463          | 0.512            | RRAS.MRAS                                                 |
| HIF1ALPHA_SIGNALING                                                                                | 0.0297 | 0.0468          | 0.512            | RRAS.MAPK7.MRAS                                           |
| Module 17                                                                                          |        |                 |                  |                                                           |
| Pathway                                                                                            | Ratio  | nominal p-value | adjusted p-value | Intersect                                                 |
| Type II Interferon Signaling                                                                       |        |                 |                  |                                                           |
| ARWAY_PATHOLOGY_IN_CHRONIC_OBSTRUCTIVE_PULMONARY_DISEASE                                           | 0.250  | 0.00109         | 0.385            | CXCL3.TNF                                                 |
| ROLE_OF_PRR_IN_INTERFERON_INDUCTION_AND_ANTIVIRAL_RESPONSE                                         | 0.0598 | 0.00291         | 0.385            | IFNG.IF1.TNF                                              |
| GERM_CELL-SERTOLI_CELL_JUNCTION_SIGNALING                                                          | 0.0318 | 0.00295         | 0.385            | TUBA1C.TUBB2A.TUBA1A.TNF.MAP3K8                           |
| I_L3_SIGNALING_AND_PRODUCTION_IN_MACROPHAGES                                                       | 0.0364 | 0.00500         | 0.396            | IFNG.IF1.TNF.MAP3K8                                       |
| I_L3-3-MEDIATED_SIGNALING                                                                          | 0.0351 | 0.00568         | 0.396            | TUBA1C.TUBB2A.TUBA1A.TNF                                  |
| RETINOIC_ACID_MEDIATED_APOPTOSIS_SIGNALING                                                         | 0.0500 | 0.00639         | 0.396            | IFNG.IF1.TIPARP                                           |
| DIFFERENTIAL_REGULATION_OF_CYTOKINE_PRODUCTION_IN_INTESTINAL_EPITHELIAL_CELLS_BY_IL-17A_AND_IL-17F | 0.0335 | 0.0353          | 0.488            | IFNG.TNF                                                  |
| HEPATIC_FIBROSIS_HEPATIC_STELLATE_CELL_ACTIVATION                                                  | 0.0286 | 0.0116          | 0.488            | IFNG.SMAD7.CXCL3.TNF                                      |
| T_HELPER_CELL_DIFFERENTIATION                                                                      | 0.0400 | 0.0118          | 0.488            | IFNG.TNF.BCL6                                             |
| ROLE_OF_HYPERCYTOKEMIA_HYPERCHOLESTEROLEMIA_IN_THE_PATHOGENESIS_OF_INFLUENZA                       | 0.0545 | 0.0164          | 0.518            | IFNG.TNF                                                  |
| PRODUCTION_OF_NITRIC_OXIDE_AND_REACTIVE_OXYGEN_SPECIES_IN_MACROPHAGES                              | 0.0256 | 0.0167          | 0.518            | IFNG.IF1.TNF.MAP3K8                                       |
| INTERFERON_SIGNALING                                                                               | 0.0306 | 0.0185          | 0.520            | IFNG.IF1                                                  |
| APOPTOSIS_SIGNALING                                                                                | 0.0326 | 0.0204          | 0.542            | LMNA.BCL2A1.TNF                                           |
| ARWAY_INFLAMMATION_IN_ASTHMA                                                                       | 0.250  | 0.0253          | 0.628            | TNF                                                       |
| ROLE_OF_CYTOKINES_IN_MEDIATING_COMMUNICATION_BETWEEN_IMMUNE_CELLS                                  | 0.0465 | 0.0264          | 0.667            | IFNG.TNF                                                  |
| MSP-RON_SIGNALING_PATHWAY                                                                          | 0.0455 | 0.0318          | 0.667            | IFNG.TNF                                                  |
| BREAST_CANCER_REGULATION_BY_STATHMIN1                                                              | 0.0260 | 0.0340          | 0.667            | TUBA1C.UBB2A.CDKN1A.TUBA1A                                |
| TYPE_1_DIABETES_MELLITUS_SIGNALING                                                                 | 0.0263 | 0.0355          | 0.667            | IFNG.IF1.TNF                                              |
| GRAFT-VERSUS-HOST_DISEASE_SIGNALING                                                                | 0.0426 | 0.0359          | 0.667            | IFNG.TNF                                                  |
| TREM1_SIGNALING                                                                                    | 0.0377 | 0.0447          | 0.791            | TREM1.TNF                                                 |
| Others                                                                                             |        |                 |                  |                                                           |
| B_CELL_RECEPTOR_SIGNALING                                                                          | 0.0274 | 0.0134          | 0.498            | BCL2A1.EGR1.BCL6.MAP3K8                                   |
| Module 18                                                                                          |        |                 |                  |                                                           |
| Pathway                                                                                            | Ratio  | nominal p-value | adjusted p-value | Intersect                                                 |
| Tyrosine Kinases Activity                                                                          |        |                 |                  |                                                           |
| INDOXYL_PHOSPHATE_METABOLISM                                                                       | 0.0378 | 0.00183         | 0.682            | DMPL.LIMK2.NRP1.1.PRKC.CSNK1D                             |
| NICOTINATE_AND_NICOTINAMIDE_METABOLISM                                                             | 0.0417 | 0.00377         | 0.701            | DMPL.LIMK2.PRKC.CSNK1D                                    |
| CREB Signaling                                                                                     |        |                 |                  |                                                           |
| FAK_SIGNALING                                                                                      | 0.0273 | 0.0374          | 1.00             | MYL5.LIMK2.SHC1                                           |
| EPHRII_RECEPTOR_SIGNALING                                                                          | 0.0206 | 0.0406          | 1.00             | LIMK2.GNA11.SHC1.CREB3                                    |
| Others                                                                                             |        |                 |                  |                                                           |
| GLYCOSAMINOGLYCAN_DEGRADATION                                                                      | 0.0800 | 0.0121          | 1.00             | FGFR1.LGUSB                                               |
| CIRCADIAN_RHYTHM_SIGNALING                                                                         | 0.0545 | 0.0183          | 1.00             | CREB3.CSNK1D                                              |
| INSULIN_RECEPTOR_SIGNALING                                                                         | 0.0244 | 0.0454          | 1.00             | STXA.NRP1.1.SHC1                                          |
| Module 19                                                                                          |        |                 |                  |                                                           |
| Pathway                                                                                            | Ratio  | nominal p-value | adjusted p-value | Intersect                                                 |
| T-cell and Natural Killer Cell Mediated Cytotoxicity                                               |        |                 |                  |                                                           |
| GRANZYME_B_SIGNALING                                                                               | 0.125  | 0.00426         | 0.447            | CZMLM.PRP1                                                |
| GRANZYME_A_SIGNALING                                                                               | 0.118  | 0.00480         | 0.447            | CZMA.PRP1                                                 |
| TUMORICIDAL_FUNCTION_OF_HEPATIC_NATURAL_KILLER_CELLS                                               | 0.0633 | 0.00949         | 0.706            | CZMLM.PRP1                                                |
| GRAFT-VERSUS-HOST_DISEASE_SIGNALING                                                                | 0.0426 | 0.0040          | 1.00             | CZMLM.PRP1                                                |
| AUTOLYSE_THYROID_DISEASE_SIGNALING                                                                 | 0.0377 | 0.0424          | 1.00             | CZMLM.PRP1                                                |
| CYTOTOXIC_T_LYMPHOCYTE-MEDIATED_APOPTOSIS_OF_TARGET_CELLS                                          | 0.0345 | 0.0099          | 1.00             | CZMLM.PRP1                                                |
| Platelet-Derived Growth Factor Signaling                                                           |        |                 |                  |                                                           |
| PPAR_SIGNALING                                                                                     | 0.0366 | 0.0139          | 0.881            | PDGFRB.PDGFD.L18RAP                                       |
| SPHINGOSINE-1-PHOSPHATE_SIGNALING                                                                  | 0.0280 | 0.0280          | 1.00             | PDGFRB.S1PR5.PDGFD                                        |
| FAK_SIGNALING                                                                                      | 0.0273 | 0.0301          | 1.00             | PDGFRB.PDGFD.PXN                                          |
| Others                                                                                             |        |                 |                  |                                                           |
| NATURAL_KILLER_CELL_SIGNALING                                                                      | 0.0631 | 3.99E-06        | 0.00149          | CD244.KLRD1.KLRB1.KIR2DL5A.KIR2DL1.KIR2DL2.KIR2DL3        |
| CROSSTALK_BETWEEN_DENDRITIC_CELLS_AND_NATURAL_KILLER_CELLS                                         | 0.0571 | 3.78E-05        | 0.00098          | KLRD1.PRP1.KIR2DL5A.KIR2DL1.KIR2DL2.KIR2DL3               |
| EICOSANOID_SIGNALING                                                                               | 0.0351 | 0.0483          | 1.00             | PTGS2.PTGS6                                               |
| Module 20                                                                                          |        |                 |                  |                                                           |
| Pathway                                                                                            | Ratio  | nominal p-value | adjusted p-value | Intersect                                                 |
| Tissue Factor Signaling                                                                            |        |                 |                  |                                                           |
| ACTIN_CYTOSKELETON_SIGNALING                                                                       | 0.0262 | 0.000213        | 0.0792           | F2R.NCKAP1.ACTN1.ITGA2B.ITGB3.MYL9                        |
| PTEN_SIGNALING                                                                                     | 0.0305 | 0.00164         | 0.253            | VHNAH.ITGA2B.BCL2L1.ITGB3                                 |
| PI3K_AKT_SIGNALING                                                                                 | 0.0286 | 0.00204         | 0.253            | VHNAH.ITGA2B.BCL2L1.ITGB3                                 |
| LK_SIGNALING                                                                                       | 0.0221 | 0.00530         | 0.319            | ACTN1.ITGB3.TGBB1.MYL9                                    |
| INTEGRIN_SIGNALING                                                                                 | 0.0206 | 0.00678         | 0.319            | ACTN1.TLNI.ITGA2B.ITGB3                                   |
| ROLE_OF_TISSUE_FACTOR_IN_CANCER                                                                    | 0.0263 | 0.00832         | 0.319            | MMP1.BCL2L1.ITGB3                                         |
| COAGULATION_SYSTEM                                                                                 | 0.0571 | 0.00847         | 0.319            | F2R.PROS1                                                 |
| ERK_MAPK_SIGNALING                                                                                 | 0.0191 | 0.00879         | 0.319            | VHNAH.TLNI.ITGA2B.ITGB3                                   |
| FAK_SIGNALING                                                                                      | 0.0275 | 0.00868         | 0.319            | TLNI.ITGA2B.ITGB3                                         |
| PI3K_SIGNALING                                                                                     | 0.0273 | 0.00921         | 0.319            | ITGA2B.ITGB3.MYL9                                         |
| I_L17A_SIGNALING_IN_FIBROBLASTS                                                                    | 0.0541 | 0.00943         | 0.319            | MMP1.CXCL5                                                |
| RAC_SIGNALING                                                                                      | 0.0236 | 0.0136          | 0.422            | NCKAP1.ITGA2B.ITGB3                                       |
| ROLE_OF_IL-17A_IN_ARTHRITIS                                                                        | 0.0267 | 0.0268          | 0.572            | MMP1.CXCL5                                                |
| GLIOMA_INVASIVENESS_SIGNALING                                                                      | 0.0351 | 0.0215          | 0.572            | F2R.ITGB3                                                 |
| CD342_SIGNALING                                                                                    | 0.0190 | 0.0243          | 0.602            | ITGA2B.ITGB3.MYL9                                         |
| ARWAY_PATHOLOGY_IN_CHRONIC_OBSTRUCTIVE_PULMONARY_DISEASE                                           | 0.0278 | 0.0243          | 0.728            | ITGA2B.ITGB3                                              |
| CAVEOLAR-MEDIATED_ENDOCYTOSIS_SIGNALING                                                            | 0.0160 | 0.0275          | 0.774            | MMP1.ACTN1.CLDN5                                          |
| LEUKOCYTE_EXTRAVASATION_SIGNALING                                                                  | 0.0241 | 0.0431          | 0.838            | MMP1.SELP                                                 |
| ATHEROSCLEROSIS_SIGNALING                                                                          | 0.0241 | 0.0431          | 0.838            | ACTN1.BCL2L1                                              |
| VEGF_SIGNALING                                                                                     | 0.0235 | 0.0450          | 0.838            | ACTN1.BCL2L1                                              |

List of 250 pathways from the Ingenuity canonical pathway database significantly enriched among genes correlated to age in the SAPIIS dataset (Fisher's exact test,  $p < 5 \times 10^{-5}$ ). For each module of the BioAge, the list of pathways and the list of genes overlapping with those pathways are given. Pathways of a same BioAge module that overlapped (Jaccard index  $\geq 0.25$ ) were regrouped and assigned a same biological function. Gene positively correlated to increases in age are indicated in red and gene negatively correlated to age are indicated in blue.

**Supplementary Table 4a. List of genes differentially expressed between HBV vaccine responders and poor-responders**

| ProbeSet ID                | Gene Symbol                    | Accession Number                   | log2 Fold-Change | t-statistic | nominal p-value | adjusted p-value |
|----------------------------|--------------------------------|------------------------------------|------------------|-------------|-----------------|------------------|
| merck-DB550188_a_at        | IGHG1                          | BC019046                           | 0.466            | 4.33        | 3.83E-05        | 1.00             |
| merck-NM_005143_a_at       | HP HPR                         | NM_005143 NM_001126102 NM_02096    | -0.689           | -4.22       | 5.77E-05        | 1.00             |
| merck-CR593799_s_at        | ---                            | CR593799                           | -0.264           | -4.08       | 9.52E-05        | 1.00             |
| merck-ENST00000341460_at   | SYDE2                          | NM_032184                          | -0.244           | -4.06       | 0.000103        | 1.00             |
| merck-HSS0061246_at        | ---                            | ---                                | -0.244           | -4.01       | 0.000124        | 1.00             |
| merck-CR617832_a_at        | CD20                           | NM_152866 NM_021950                | 0.593            | 3.99        | 0.000133        | 1.00             |
| merck-ENST00000378777_x_at | ---                            | DO145726                           | -0.820           | -3.92       | 0.000169        | 1.00             |
| merck-AK023762_at          | SPTBN1                         | NM_003128                          | 0.254            | 3.89        | 0.000187        | 1.00             |
| merck-ENST00000335534_s_at | KIF18B                         | BC048263                           | -0.259           | -3.89       | 0.000187        | 1.00             |
| merck2-ENST00000378777_at  | ---                            | ---                                | -0.831           | -3.89       | 0.000192        | 1.00             |
| merck2-CD517359_a_at       | SPTBN1                         | NM_003128                          | 0.284            | 3.83        | 0.000230        | 1.00             |
| merck2-AK093024_at         | BANK1                          | NM_017935 NM_001083907 NM_00112    | 0.515            | 3.76        | 0.000299        | 1.00             |
| merck-BX537613_at          | ---                            | BX537613                           | 0.289            | 3.76        | 0.000299        | 1.00             |
| merck-ENST00000372057_s_at | AMMECR1                        | NM_015365 NM_001025580 NM_00117    | 0.222            | 3.73        | 0.000332        | 1.00             |
| merck2-NM_152867_a_at      | CD20                           | NM_152866 NM_021950                | 0.472            | 3.71        | 0.000351        | 1.00             |
| merck-NM_014399_at         | TSPAN13                        | NM_014399                          | 0.461            | 3.71        | 0.000358        | 1.00             |
| merck2-BC031039_at         | EFHC2                          | NM_025184                          | 0.302            | 3.69        | 0.000374        | 1.00             |
| merck-BC027917_s_at        | DEFA1 DEFA1B DEFA3             | NM_004084 NM_001042500 NM_00521    | -0.565           | -3.69       | 0.000382        | 1.00             |
| merck2-NM_001042500_s_at   | ---                            | ---                                | -0.595           | -3.67       | 0.000400        | 1.00             |
| merck-XM_497642_at         | TARMI1                         | NM_001135686                       | -0.253           | -3.62       | 0.000475        | 1.00             |
| merck2-AK225546_at         | ---                            | ---                                | 0.323            | 3.61        | 0.000501        | 1.00             |
| merck2-ENST00000376463_at  | ---                            | CR612105                           | 0.325            | 3.57        | 0.000562        | 1.00             |
| merck2-AK225575_at         | LRRK1                          | NM_024652                          | -0.215           | -3.57       | 0.000566        | 1.00             |
| merck-NM_175870_at         | IGHV5-78                       | BC002792                           | 0.402            | 3.56        | 0.000595        | 1.00             |
| merck2-BX647990_at         | RASGRP3                        | NM_001139488 NM_170672 NM_01537    | 0.345            | 3.55        | 0.000605        | 1.00             |
| merck-C9410700_at          | ---                            | ACT36424                           | 0.259            | 3.55        | 0.000614        | 1.00             |
| merck-NM_025184_s_at       | EFHC2                          | NM_025184                          | 0.322            | 3.54        | 0.000637        | 1.00             |
| merck-CA447901_at          | ---                            | ---                                | 0.481            | 3.53        | 0.000644        | 1.00             |
| merck2-NM_032738_at        | FCRLA                          | NM_001184866 NM_032738 NM_00118    | 0.480            | 3.50        | 0.000727        | 1.00             |
| merck-HCT1764595_x_at      | ---                            | NG_027989                          | -0.230           | -3.49       | 0.000738        | 1.00             |
| merck-NM_001813_at         | CENPE                          | NM_001813                          | -0.306           | -3.49       | 0.000740        | 1.00             |
| merck-ENST00000316124_at   | LOC439914                      | AK094364                           | -0.263           | -3.49       | 0.000740        | 1.00             |
| merck-LIT1834_at           | ---                            | AY166681                           | -0.276           | -3.48       | 0.000772        | 1.00             |
| merck-NM_030764_s_at       | FCRL2                          | NM_030764                          | 0.393            | 3.47        | 0.000795        | 1.00             |
| merck-AK094902_at          | ---                            | AK094902                           | -0.235           | -3.46       | 0.000818        | 1.00             |
| merck2-AM180330_a_at       | BLNK                           | NM_013314 NM_001114094             | 0.285            | 3.46        | 0.000821        | 1.00             |
| merck2-BX503020_at         | PDE1E                          | NM_177966                          | -0.247           | -3.45       | 0.000840        | 1.00             |
| merck2-BC048131_at         | LOC505943                      | BC048131                           | 0.389            | 3.45        | 0.000858        | 1.00             |
| merck-NM_001039567_at      | RPS4Y2                         | NM_001039567                       | -0.363           | -3.44       | 0.000882        | 1.00             |
| merck-NM_017784_s_at       | OSBP1.10                       | NM_017784 NM_001174060             | 0.557            | 3.43        | 0.000890        | 1.00             |
| merck-NM_032738_at         | FCRLA                          | NM_001184866 NM_032738 NM_00118    | 0.458            | 3.43        | 0.000916        | 1.00             |
| merck-ENST00000380813_at   | SNAPC3                         | BC036031                           | 0.235            | 3.42        | 0.000939        | 1.00             |
| merck-AK097083_at          | LOC283663                      | NR_024433                          | 0.426            | 3.42        | 0.000940        | 1.00             |
| merck-NM_021963_at         | NAP1L2                         | NM_021963                          | 0.405            | 3.41        | 0.000953        | 1.00             |
| merck-NM_008235_at         | POU2AF1                        | NM_008235                          | 0.395            | 3.39        | 0.001002        | 1.00             |
| merck-NM_032539_at         | SLITRK2                        | NM_032539 NM_001144003 NM_00114    | 0.679            | 3.38        | 0.00106         | 1.00             |
| merck-AK096733_at          | LOC729603                      | NR_003288                          | -0.244           | -3.38       | 0.00106         | 1.00             |
| merck-AK094141_s_at        | ZMAT1                          | NM_001011657 NR_036431             | 0.332            | 3.37        | 0.00109         | 1.00             |
| merck-NM_001925_at         | DEFA4                          | NM_001925                          | -1.10            | -3.37       | 0.00110         | 1.00             |
| merck2-NM_021950_at        | CD20                           | NM_152866 NM_021950                | 0.596            | 3.37        | 0.00110         | 1.00             |
| merck-NM_001911_at         | CTSG                           | NM_001911                          | -0.740           | -3.37       | 0.00111         | 1.00             |
| merck2-AI382268_at         | BACH2                          | NM_001170794                       | 0.247            | 3.36        | 0.00113         | 1.00             |
| merck-NM_014888_at         | FAM3C                          | NM_014888 NM_001040020             | 0.426            | 3.35        | 0.00118         | 1.00             |
| merck2-AK025965_at         | BOD1L                          | NM_148894                          | -0.205           | -3.34       | 0.00123         | 1.00             |
| merck-NM_002777_at         | PRTN3                          | NM_002777                          | -0.282           | -3.33       | 0.00124         | 1.00             |
| merck-AK025613_at          | STRBP                          | NM_018387 NM_001171137 NR_03323    | 0.283            | 3.33        | 0.00125         | 1.00             |
| merck-ENST00000373502_at   | CHIC1                          | NM_001039840                       | 0.246            | 3.33        | 0.00125         | 1.00             |
| merck-BC035211_at          | ---                            | ---                                | 0.210            | 3.31        | 0.00134         | 1.00             |
| merck2-BX641093_at         | ---                            | ---                                | -0.211           | -3.31       | 0.00134         | 1.00             |
| merck-NM_001025580_at      | AMMECR1                        | NM_015365 NM_001025580 NM_00117    | 0.182            | 3.30        | 0.00139         | 1.00             |
| merck-XM_067085_a_at       | ---                            | ---                                | -0.297           | -3.30       | 0.00139         | 1.00             |
| merck2-M62449_at           | NAAA                           | NM_001042402                       | -0.243           | -3.29       | 0.00140         | 1.00             |
| merck2-AW613529_at         | TPCN2                          | NM_139075                          | -0.215           | -3.28       | 0.00145         | 1.00             |
| merck2-N48311_at           | SSPN                           | NM_005086 NM_001135823             | 0.305            | 3.28        | 0.00147         | 1.00             |
| merck-NM_005346_s_at       | HSPA1B                         | NM_005346                          | -0.309           | -3.28       | 0.00147         | 1.00             |
| merck-NM_020993_at         | BCL7A                          | NM_020993 NM_001024808             | 0.295            | 3.27        | 0.00149         | 1.00             |
| merck-NM_000475_at         | NR0B1                          | NM_000475                          | -0.216           | -3.27       | 0.00150         | 1.00             |
| merck-NM_032226_s_at       | ZCHCH7                         | NM_032226                          | 0.220            | 3.27        | 0.00151         | 1.00             |
| merck-L17326_at            | ---                            | L17326                             | -0.299           | -3.27       | 0.00153         | 1.00             |
| merck-AK128305_a_at        | LOC100132741 FLJ46446          | AK128424                           | 0.396            | 3.26        | 0.00155         | 1.00             |
| merck2-AF343666_at         | ---                            | ---                                | 0.264            | 3.26        | 0.00157         | 1.00             |
| merck-BC071811_s_at        | LOC390940                      | NM_001193621 NM_001193622          | -0.257           | -3.26       | 0.00158         | 1.00             |
| merck-NM_017570_s_at       | OPHLN                          | NM_017570                          | -0.257           | -3.26       | 0.00158         | 1.00             |
| merck-AK090917_a_at        | TMEM47                         | NM_031442                          | 0.368            | 3.25        | 0.00159         | 1.00             |
| merck-NM_018159_at         | NUTD11                         | NM_018159                          | 0.431            | 3.25        | 0.00160         | 1.00             |
| merck2-AY358278_at         | ANGPTL1                        | NM_004673                          | 0.256            | 3.24        | 0.00165         | 1.00             |
| merck2-BQ574789_at         | PRICKLE1                       | NM_153026 NM_001144881 NM_00114    | 0.359            | 3.24        | 0.00168         | 1.00             |
| merck-XM_941496_at         | CDC42B                         | NM_001144872                       | -0.200           | -3.23       | 0.00170         | 1.00             |
| merck-CR607463_at          | ---                            | XR_109139 XR_109140 XR_111345 XR   | -0.216           | -3.22       | 0.00175         | 1.00             |
| merck-AK057582_a_at        | INO80                          | NM_017553                          | -0.219           | -3.22       | 0.00179         | 1.00             |
| merck-ENST00000329990_at   | ---                            | AF090928                           | -0.237           | -3.21       | 0.00183         | 1.00             |
| merck2-AK092411_at         | ---                            | AK092411                           | -0.201           | -3.21       | 0.00184         | 1.00             |
| merck2-NM_021034_x_at      | IFITM3                         | NM_021034                          | -0.560           | -3.20       | 0.00188         | 1.00             |
| merck-AW138288_at          | ---                            | ---                                | -0.210           | -3.19       | 0.00195         | 1.00             |
| merck-NM_000839_at         | POMC                           | NM_001035256 NM_000939             | -0.266           | -3.18       | 0.00199         | 1.00             |
| merck-NM_001040064_s_at    | ANXA8L1 ANXA8L2 ANXA8          | NM_001089445 NM_001630 NM_00104    | -0.294           | -3.18       | 0.00199         | 1.00             |
| merck2-AI215130_at         | ZC3H13                         | NM_015070                          | -0.238           | -3.18       | 0.00202         | 1.00             |
| merck-NM_032452_at         | JPH4                           | NM_032452 NM_001146028             | -0.208           | -3.18       | 0.00202         | 1.00             |
| merck-NM_021722_at         | ADAM22                         | NM_021723 NM_021722 NM_016351      | 0.224            | 3.17        | 0.00206         | 1.00             |
| merck-NM_004847_at         | AIF1                           | NM_004847                          | -0.328           | -3.17       | 0.00209         | 1.00             |
| merck-NM_000601_a_at       | HCF                            | NM_000601 NM_001010932             | -0.324           | -3.16       | 0.00210         | 1.00             |
| merck-AI125255_s_at        | LOC10404266                    | NR_033205 NR_033202 NR_033203      | -0.138           | -3.16       | 0.00211         | 1.00             |
| merck-AK002111_a_at        | KPNA6                          | NM_012316                          | -0.231           | -3.16       | 0.00212         | 1.00             |
| merck2-DQ893507_a_at       | CD20                           | NM_152866 NM_021950                | 0.427            | 3.15        | 0.00218         | 1.00             |
| merck-AA761555_at          | ---                            | ---                                | 0.208            | 3.15        | 0.00219         | 1.00             |
| merck-BX648376_s_at        | CD300E                         | NM_181449                          | -0.226           | -3.15       | 0.00220         | 1.00             |
| merck-AK123284_a_at        | DMXL2                          | NM_001174116 NM_015263 NM_00117    | -0.253           | -3.15       | 0.00220         | 1.00             |
| merck-ENST00000377058_at   | CXorf24                        | BC029179                           | 0.295            | 3.15        | 0.00222         | 1.00             |
| merck-BM724616_at          | ---                            | ---                                | 0.253            | 3.15        | 0.00222         | 1.00             |
| merck-NM_000017_at         | ACADS                          | NM_000017                          | -0.184           | -3.15       | 0.00223         | 1.00             |
| merck-NM_004673_at         | ANGPTL1                        | NM_004673                          | 0.285            | 3.14        | 0.00224         | 1.00             |
| merck-NM_000109_at         | DMD                            | NM_004022 NM_004014 NM_004013 N    | 0.544            | 3.14        | 0.00228         | 1.00             |
| merck-NM_058186_s_at       | FAM3B                          | NM_058186 NM_206964                | -0.471           | -3.14       | 0.00228         | 1.00             |
| merck-AF143331_at          | ---                            | AF143331                           | -0.181           | -3.13       | 0.00236         | 1.00             |
| merck-ALB33646_at          | LOC285084                      | ALB33646                           | -0.165           | -3.12       | 0.00240         | 1.00             |
| merck-AF086013_at          | ---                            | AF086013                           | 0.153            | 3.12        | 0.00240         | 1.00             |
| merck-XM_944199_at         | ---                            | AC007244                           | -0.315           | -3.12       | 0.00242         | 1.00             |
| merck-NM_002483_at         | CEACAM6                        | NM_002483                          | -0.685           | -3.12       | 0.00242         | 1.00             |
| merck2-BX641138_at         | RAB30                          | BX641138                           | 0.276            | 3.12        | 0.00243         | 1.00             |
| merck-NM_198519_at         | ---                            | XM_002343118 XM_003119510 XM_003   | 0.294            | 3.11        | 0.00246         | 1.00             |
| merck-BI765156_at          | ---                            | ---                                | -0.201           | -3.11       | 0.00247         | 1.00             |
| merck-BC033758_a_at        | ADAP2                          | NM_018404                          | -0.231           | -3.10       | 0.00254         | 1.00             |
| merck-X56197_s_at          | XIST                           | NR_001564                          | 1.97             | 3.10        | 0.00254         | 1.00             |
| merck-NM_170672_s_at       | RASGRP3                        | NM_001139488 NM_170672 NM_01537    | 0.392            | 3.10        | 0.00254         | 1.00             |
| merck2-AK092049_at         | CLCN6                          | NM_001127999 NM_001278998 NM_00    | 0.259            | 3.10        | 0.00259         | 1.00             |
| merck-US4711_s_at          | BIRC3                          | NM_001165                          | -0.232           | -3.09       | 0.00261         | 1.00             |
| merck-NM_001005287_x_at    | OR2A1 OR2A42                   | NM_001005287 NM_001001802          | 0.282            | 3.09        | 0.00263         | 1.00             |
| merck-ENST00000379910_x_at | ---                            | AF487336                           | 0.641            | 3.09        | 0.00265         | 1.00             |
| merck2-BF804746_a_at       | SUPT6H                         | NM_003170                          | -0.237           | -3.09       | 0.00268         | 1.00             |
| merck2-AB011420_a_at       | STK17A                         | NM_004760                          | 0.447            | 3.08        | 0.00269         | 1.00             |
| merck-NM_175080_at         | P2RX6                          | NM_002561 NM_175080 NM_00120451    | 0.360            | 3.08        | 0.00270         | 1.00             |
| merck-BC046476_at          | LOC100507360                   | XR_109953 XR_112345 XR_115626      | 0.239            | 3.08        | 0.00272         | 1.00             |
| merck2-BC033178_x_at       | ---                            | ---                                | 0.413            | 3.08        | 0.00274         | 1.00             |
| merck-AF379636_x_at        | NBPF10 NBPF14 NBPF15 NBPF16 NB | NB1NM_001039703 NM_015383 NM_00117 | -0.193           | -3.08       | 0.00275         | 1.00             |
| merck-ENST00000338882_at   | ---                            | AK127146                           | -0.128           | -3.08       | 0.00276         | 1.00             |
| merck-AW975021_s_at        | ---                            | NG_012559                          | 0.264            | 3.07        | 0.00281         | 1.00             |
| merck-BE670974_at          | ---                            | AY528561                           | 0.248            | 3.06        | 0.00292         | 1.00             |

**Legend**

- h5-gene signature
- Genes repressed in HBV vaccine responders compared to poor-responders
- Genes induced in HBV vaccine responders compared to poor-responders

|                            |                                      |                                 |        |       |         |      |
|----------------------------|--------------------------------------|---------------------------------|--------|-------|---------|------|
| merck-AK025659_at          | ---                                  | AK025659                        | 0.296  | 3.06  | 0.00294 | 1.00 |
| merck-AA758573_at          | ---                                  | AC231981                        | -0.201 | -3.06 | 0.00294 | 1.00 |
| merck2-BC046187_at         | <b>CXorf23</b>                       | NM_198279                       | 0.182  | 3.05  | 0.00296 | 1.00 |
| merck-NM_020995_at         | <b>HPR</b>                           | NM_020995                       | -0.156 | -3.05 | 0.00298 | 1.00 |
| merck2-AK129777_x_at       | ---                                  | ---                             | 0.654  | 3.05  | 0.00300 | 1.00 |
| merck-AK026467_at          | <b>CD22</b>                          | AK026467                        | 0.229  | 3.05  | 0.00302 | 1.00 |
| merck-NM_194251_at         | <b>GPR151</b>                        | NM_194251                       | -0.182 | -3.04 | 0.00304 | 1.00 |
| merck2-BF435813_at         | ---                                  | ---                             | 0.288  | 3.04  | 0.00310 | 1.00 |
| merck-AK054869_at          | <b>XIST</b>                          | NR_001564                       | 2.24   | 3.03  | 0.00313 | 1.00 |
| merck-AL079282_at          | ---                                  | AL079282                        | 0.593  | 3.03  | 0.00314 | 1.00 |
| merck2-NM_139013_at        | <b>MAPK14</b>                        | NM_001315 NM_139012 NM_139013 N | -0.203 | -3.03 | 0.00318 | 1.00 |
| merck-AK095945_s_at        | ---                                  | AK095945                        | 0.182  | 3.03  | 0.00319 | 1.00 |
| merck-NM_032458_at         | <b>PHF6</b>                          | NM_001015877 NM_032458          | 0.266  | 3.03  | 0.00320 | 1.00 |
| merck2-AY172957_x_at       | ---                                  | ---                             | 0.645  | 3.02  | 0.00328 | 1.00 |
| merck-NM_033446_s_at       | <b>FAM125B</b>                       | NM_033446                       | -0.283 | -3.02 | 0.00328 | 1.00 |
| merck2-AK096900_at         | <b>FCRL1</b>                         | NM_052938 NM_001159397 NM_00115 | 0.540  | 3.02  | 0.00328 | 1.00 |
| merck-NM_001816_at         | <b>CEACAM8</b>                       | NM_001816                       | -0.803 | -3.01 | 0.00336 | 1.00 |
| merck2-NM_001040077_x_at   | ---                                  | ---                             | 0.630  | 3.01  | 0.00337 | 1.00 |
| merck2-BC041570_at         | <b>TRPM2</b>                         | NM_003307                       | -0.239 | -3.01 | 0.00337 | 1.00 |
| merck2-AA604317_at         | ---                                  | AC004111                        | -0.308 | -3.01 | 0.00340 | 1.00 |
| merck-NM_021034_x_at       | <b>IFTM3</b>                         | NM_021034                       | -0.567 | -3.01 | 0.00341 | 1.00 |
| merck-AF379633_x_at        | <b>NBP10 NBP14 NBP15 NBP16 NBP17</b> | NM_001039703 NM_015383 NM_00117 | -0.189 | -3.00 | 0.00344 | 1.00 |
| merck2-BM983732_at         | <b>XIST</b>                          | NR_001564                       | 2.29   | 3.00  | 0.00344 | 1.00 |
| merck-HCT2255763_at        | ---                                  | ---                             | 0.284  | 3.00  | 0.00346 | 1.00 |
| merck-NM_002526_at         | <b>NTSE</b>                          | NM_002526                       | 0.508  | 3.00  | 0.00351 | 1.00 |
| merck-BM547816_a_at        | <b>LIX1</b>                          | NM_153234                       | 0.266  | 2.99  | 0.00357 | 1.00 |
| merck-NM_006885_at         | <b>ZFXH3</b>                         | NM_006885 NM_001164766          | -0.168 | -2.99 | 0.00358 | 1.00 |
| merck2-BC117447_at         | <b>SMARCA1</b>                       | NM_003089 NM_139035             | 0.285  | 2.98  | 0.00364 | 1.00 |
| merck-AF119868_at          | ---                                  | AF119868                        | 0.196  | 2.98  | 0.00366 | 1.00 |
| merck2-NM_001816_at        | <b>CEACAM8</b>                       | NM_001816                       | -0.809 | -2.98 | 0.00367 | 1.00 |
| merck2-AF035036_x_at       | ---                                  | U07539                          | 0.336  | 2.98  | 0.00372 | 1.00 |
| merck-NM_175886_at         | <b>PRPS1L1</b>                       | NM_175886                       | -0.159 | -2.97 | 0.00374 | 1.00 |
| merck2-X56198_at           | <b>XIST</b>                          | NR_001564                       | 1.37   | 2.97  | 0.00379 | 1.00 |
| merck2-BX649112_s_at       | <b>COBL1</b>                         | BX649112                        | 0.209  | 2.97  | 0.00381 | 1.00 |
| merck-NM_018125_at         | <b>ARHGGE10L</b>                     | NM_018125 NM_001011722          | -0.216 | -2.97 | 0.00384 | 1.00 |
| merck-BQ423246_s_at        | ---                                  | AL355520                        | 0.245  | 2.96  | 0.00390 | 1.00 |
| merck-BG193833_s_at        | <b>RPS4Y1 RPS4Y2</b>                 | NM_001008 NM_001039567          | -1.95  | -2.96 | 0.00390 | 1.00 |
| merck-XM_938841_at         | ---                                  | NG_024791                       | -0.436 | -2.96 | 0.00393 | 1.00 |
| merck-NM_015884_at         | <b>MBTPS2</b>                        | NM_015884                       | 0.168  | 2.96  | 0.00396 | 1.00 |
| merck-NM_014750_at         | <b>DLGAP5</b>                        | NM_014750 NM_001146015          | -0.249 | -2.95 | 0.00397 | 1.00 |
| merck-BX505106_a_at        | <b>BBS7</b>                          | NM_176824 NM_018190             | -0.176 | -2.95 | 0.00398 | 1.00 |
| merck-AV658731_at          | ---                                  | M97168                          | 2.12   | 2.95  | 0.00403 | 1.00 |
| merck-NM_012471_at         | <b>TRPC5</b>                         | NM_012471                       | 0.177  | 2.95  | 0.00405 | 1.00 |
| merck-NM_032931_a_at       | <b>SLC9A7</b>                        | NM_032931                       | 0.227  | 2.94  | 0.00415 | 1.00 |
| merck-CR749383_at          | <b>XIST</b>                          | NR_001564                       | 2.34   | 2.94  | 0.00418 | 1.00 |
| merck-XM_942050_at         | ---                                  | NG_008685                       | -0.122 | -2.94 | 0.00418 | 1.00 |
| merck-NM_004469_at         | <b>FIGF PIR-FIGF</b>                 | NM_004469 NR_037859             | 0.301  | 2.94  | 0.00418 | 1.00 |
| merck-NM_006777_at         | <b>ZBTB33</b>                        | NM_001184742 NM_006777          | 0.165  | 2.93  | 0.00423 | 1.00 |
| merck2-AF000985_at         | <b>DDX3Y</b>                         | NM_001122665 NM_004660          | -0.998 | -2.93 | 0.00425 | 1.00 |
| merck-NM_001972_at         | <b>ELANE</b>                         | NM_001972                       | -0.628 | -2.93 | 0.00425 | 1.00 |
| merck-AA322245_s_at        | ---                                  | AC010969                        | -0.299 | -2.93 | 0.00426 | 1.00 |
| merck-NM_001947_s_at       | <b>DUSP7</b>                         | NM_001947                       | -0.186 | -2.93 | 0.00426 | 1.00 |
| merck-NM_014562_at         | <b>OTX1</b>                          | NM_014562 NM_001199770          | -0.191 | -2.93 | 0.00427 | 1.00 |
| merck-BX641058_s_at        | ---                                  | BX641058                        | -0.398 | -2.92 | 0.00433 | 1.00 |
| merck2-NM_001831_at        | <b>CLU</b>                           | NM_001831 NM_203339 NM_0017113  | 0.156  | 2.92  | 0.00436 | 1.00 |
| merck2-BX640620_x_at       | ---                                  | ---                             | 0.566  | 2.92  | 0.00437 | 1.00 |
| merck-BM61644_a_at         | <b>MEX3C</b>                         | NM_016626                       | -0.144 | -2.92 | 0.00439 | 1.00 |
| merck-AK092185_s_at        | ---                                  | BC032890                        | 0.307  | 2.92  | 0.00445 | 1.00 |
| merck2-EL947810_at         | <b>DHRS4L2</b>                       | AY920361                        | -0.292 | -2.91 | 0.00449 | 1.00 |
| merck2-NM_001007_x_at      | ---                                  | ---                             | 0.0973 | 2.91  | 0.00450 | 1.00 |
| merck-NM_000071_s_at       | <b>CBS</b>                           | NM_000071 NM_001178008          | -0.239 | -2.91 | 0.00454 | 1.00 |
| merck2-NM_032451_at        | <b>SPR12</b>                         | NM_032451                       | -0.160 | -2.90 | 0.00461 | 1.00 |
| merck-NM_152633_at         | <b>FANCA2</b>                        | NM_001016113 NM_152633          | 0.337  | 2.90  | 0.00461 | 1.00 |
| merck-NM_005401_at         | <b>PTPN14</b>                        | NM_005401                       | -0.184 | -2.90 | 0.00469 | 1.00 |
| merck-ENST00000371256_at   | <b>GRIA3</b>                         | NM_007325 NM_000828             | 0.326  | 2.90  | 0.00471 | 1.00 |
| merck-BG054624_at          | ---                                  | ---                             | -0.181 | -2.89 | 0.00474 | 1.00 |
| merck-NM_017666_at         | <b>ZNF280C</b>                       | NM_017666                       | 0.246  | 2.89  | 0.00477 | 1.00 |
| merck-BX116938_at          | <b>ZFY-AS1</b>                       | XR_109785 XR_115519             | -0.321 | -2.89 | 0.00479 | 1.00 |
| merck2-BC033940_at         | ---                                  | ---                             | -0.264 | -2.89 | 0.00481 | 1.00 |
| merck-BX464612_s_at        | <b>ASNS</b>                          | NM_133436 NM_001673 NM_183356 N | 0.210  | 2.89  | 0.00486 | 1.00 |
| merck2-AK027592_at         | <b>ZNF382</b>                        | NM_032825                       | 0.274  | 2.88  | 0.00492 | 1.00 |
| merck-NM_052938_at         | <b>FCRL1</b>                         | NM_052938 NM_001159397 NM_00115 | 0.541  | 2.88  | 0.00497 | 1.00 |
| merck-ENST00000368180_a_at | <b>FCRL2</b>                         | NM_030764                       | 0.321  | 2.88  | 0.00499 | 1.00 |
| merck-BF755867_at          | <b>RPS4Y1</b>                        | NM_001008                       | 0.215  | 2.88  | 0.00500 | 1.00 |
| merck2-AK093149_x_at       | <b>MYO5B</b>                         | NM_001080467                    | 0.148  | 2.87  | 0.00503 | 1.00 |
| merck-AK095793_at          | <b>PRKXP1</b>                        | AK095793                        | 0.434  | 2.87  | 0.00503 | 1.00 |
| merck-AK095439_at          | ---                                  | AK095439                        | 0.375  | 2.87  | 0.00503 | 1.00 |
| merck2-BC036314_at         | ---                                  | ---                             | -0.566 | -2.87 | 0.00516 | 1.00 |
| merck2-BX092881_at         | ---                                  | AC091821                        | 0.257  | 2.86  | 0.00520 | 1.00 |
| merck-NM_152339_at         | <b>SPATA2L</b>                       | NM_152339                       | -0.211 | -2.86 | 0.00520 | 1.00 |
| merck-NM_181332_at         | <b>NLGN4X</b>                        | NM_020742 NM_181332             | 2.470  | 2.86  | 0.00521 | 1.00 |
| merck-BC005248_a_at        | <b>EIF1AY</b>                        | NM_004681                       | -1.94  | -2.86 | 0.00525 | 1.00 |
| merck-AL713776_at          | <b>DKFZp434L192</b>                  | NR_026929                       | -0.167 | -2.86 | 0.00525 | 1.00 |
| merck-NM_023068_s_at       | <b>SIGLEC1</b>                       | NM_023068                       | -0.709 | -2.86 | 0.00525 | 1.00 |
| merck-NM_004853_at         | <b>KDM5D</b>                         | NM_001146705 NM_004653 NM_00114 | -1.50  | -2.86 | 0.00527 | 1.00 |
| merck2-BC016381_x_at       | ---                                  | ---                             | 0.575  | 2.86  | 0.00528 | 1.00 |
| merck2-DA322541_at         | <b>DMXL2</b>                         | NM_001174116 NM_015263 NM_00117 | -0.260 | -2.86 | 0.00528 | 1.00 |
| merck-BF979936_s_at        | <b>HEATR8 HEATR8-TTC4</b>            | NM_001039464 NR_026782 NR_03783 | -0.229 | -2.85 | 0.00532 | 1.00 |
| merck2-NM_016529_at        | <b>ATP8A2</b>                        | NM_016529                       | -0.169 | -2.85 | 0.00534 | 1.00 |
| merck2-DA885371_a_at       | <b>EPB41L4A</b>                      | NM_022140                       | -0.240 | -2.85 | 0.00536 | 1.00 |
| merck2-NM_0011008_at       | <b>RPS4Y1</b>                        | NM_001008                       | -2.01  | -2.85 | 0.00537 | 1.00 |
| merck2-CF454950_at         | <b>GP1MB</b>                         | NM_001001996 NM_006278 NM_00100 | 0.378  | 2.85  | 0.00545 | 1.00 |
| merck2-Z26642_at           | <b>PLCB3</b>                         | NM_000932 NM_001184883          | -0.186 | -2.85 | 0.00545 | 1.00 |
| merck2-NM_000693_at        | <b>ALDH1A3</b>                       | NM_000693                       | 0.209  | 2.85  | 0.00546 | 1.00 |
| merck2-BE382874_a_at       | <b>MRPS12</b>                        | NM_003362                       | -0.182 | -2.84 | 0.00549 | 1.00 |
| merck2-AF068846_a_at       | ---                                  | ---                             | 0.0843 | 2.84  | 0.00552 | 1.00 |
| merck2-AL696751_at         | ---                                  | CR616022                        | 0.182  | 2.84  | 0.00553 | 1.00 |
| merck-YD9443_a_at          | <b>AGPS</b>                          | NM_003659                       | -0.167 | -2.84 | 0.00554 | 1.00 |
| merck2-AI658826_a_at       | <b>EIF1AY</b>                        | NM_004681                       | -1.84  | -2.84 | 0.00554 | 1.00 |
| merck-ENST00000375217_a_at | <b>UBR4</b>                          | NM_020765                       | -0.242 | -2.84 | 0.00554 | 1.00 |
| merck-AK125225_at          | <b>ATP8B3</b>                        | BC033179                        | -0.217 | -2.84 | 0.00556 | 1.00 |
| merck-XM_926024_x_at       | ---                                  | NG_022676                       | 0.132  | 2.84  | 0.00556 | 1.00 |
| merck-NM_002167_s_at       | <b>ID3</b>                           | NM_002167                       | 0.291  | 2.84  | 0.00558 | 1.00 |
| merck2-HCT1640467_2_x_at   | ---                                  | NG_009885                       | -0.143 | -2.84 | 0.00558 | 1.00 |
| merck-ENST00000380600_at   | <b>TCEANC</b>                        | BC020095                        | 0.230  | 2.84  | 0.00561 | 1.00 |
| merck2-NM_058171_s_at      | <b>INGX</b>                          | NR_002226                       | 0.371  | 2.83  | 0.00577 | 1.00 |
| merck-AA757671_at          | ---                                  | AC003014                        | 0.493  | 2.83  | 0.00578 | 1.00 |
| merck-NM_003069_at         | <b>SMARCA1</b>                       | NM_003069 NM_139035             | 0.279  | 2.82  | 0.00579 | 1.00 |
| merck-NM_00108537_a_at     | <b>KIAA2022</b>                      | NM_00108537                     | 0.382  | 2.82  | 0.00582 | 1.00 |
| merck-NM_001908_s_at       | <b>CTSB</b>                          | NM_001908 NM_147780 NM_147781 N | -0.197 | -2.82 | 0.00586 | 1.00 |
| merck-NM_021983_x_at       | <b>HLA-DRB4 LOC100509582</b>         | NM_021983 XM_003120275 XM_00312 | -1.77  | -2.82 | 0.00590 | 1.00 |
| merck-NM_001003698_a_at    | <b>RREB1</b>                         | NM_001003699 NM_001168344 NM_00 | -0.147 | -2.82 | 0.00590 | 1.00 |
| merck-AF147347_at          | ---                                  | AF147347                        | -0.283 | -2.82 | 0.00591 | 1.00 |
| merck-AF089138_at          | ---                                  | ---                             | 0.164  | 2.82  | 0.00592 | 1.00 |
| merck-AK074226_at          | ---                                  | AK074226                        | -0.198 | -2.82 | 0.00595 | 1.00 |
| merck2-AI884170_at         | <b>SENP5</b>                         | NM_152689                       | -0.218 | -2.81 | 0.00597 | 1.00 |
| merck-NM_000406_s_at       | <b>GP2D</b>                          | NM_001083112 NM_000408          | -0.169 | -2.81 | 0.00598 | 1.00 |
| merck2-BC040939_at         | <b>LOC386758</b>                     | NR_037159 NR_037160 NR_037161   | 0.179  | 2.81  | 0.00602 | 1.00 |
| merck-NM_001725_at         | <b>BPI</b>                           | NM_001725 XM_002345420          | -0.703 | -2.81 | 0.00602 | 1.00 |
| merck2-NM_138450_at        | <b>ARL11</b>                         | NM_138450                       | -0.294 | -2.81 | 0.00604 | 1.00 |
| merck-NM_030639_at         | <b>BHLHB9</b>                        | NM_001142524 NM_030639 NM_00114 | 0.419  | 2.81  | 0.00605 | 1.00 |
| merck-NM_002547_at         | <b>OPN1K</b>                         | NM_002547                       | 0.322  | 2.81  | 0.00606 | 1.00 |
| merck-NM_022003_at         | <b>FXYD6</b>                         | NM_022003 NM_001164831 NM_00116 | -0.345 | -2.81 | 0.00610 | 1.00 |
| merck2-DB485269_at         | ---                                  | ---                             | 0.169  | 2.81  | 0.00610 | 1.00 |
| merck-NM_004619_at         | <b>TRAF5</b>                         | NM_004619 NM_145759 NM_00103391 | 0.276  | 2.80  | 0.00614 | 1.00 |
| merck-ENST00000311191_s_at | <b>LRCH1</b>                         | NM_001164213                    | 0.138  | 2.80  | 0.00621 | 1.00 |
| merck-AK097140_at          | <b>BCORP1</b>                        | NR_033732 NR_002923             | -0.317 | -2.80 | 0.00626 | 1.00 |
| merck-ENST00000365088_a_at | <b>KAT6B</b>                         | NM_011230                       | 0.143  | 2.80  | 0.00629 | 1.00 |
| merck-CR593697_a_at        | <b>PLSCR1</b>                        | NM_021105                       | -0.322 | -2.79 | 0.00633 | 1.00 |

|                            |                           |                                 |        |       |         |      |
|----------------------------|---------------------------|---------------------------------|--------|-------|---------|------|
| merck-R08351_s_at          | ---                       | NG_023798                       | -0.166 | -2.79 | 0.00635 | 1.00 |
| merck-NM_152761_at         | CXorf58                   | NM_152761 NM_00169574           | 0.341  | 2.79  | 0.00637 | 1.00 |
| merck-AL633181_at          | ---                       | AL633181                        | 0.219  | 2.79  | 0.00638 | 1.00 |
| merck-NM_001412_at         | E1F1AX                    | NM_001412                       | 0.405  | 2.79  | 0.00639 | 1.00 |
| merck-G36912_at            | ---                       | AF268650                        | -0.201 | -2.79 | 0.00639 | 1.00 |
| merck2-BC089400_at         | MAP7D2                    | NM_00168465 NM_152780 NM_00116  | 0.296  | 2.79  | 0.00639 | 1.00 |
| merck2-NM_015187_at        | SEL1L3                    | NM_015187                       | 0.287  | 2.79  | 0.00640 | 1.00 |
| merck2-ENST00000368925_at  | ---                       | AL050350                        | -0.232 | -2.79 | 0.00640 | 1.00 |
| merck2-NM_018387_at        | STRBP                     | NM_018387 NM_001171137 NR_03323 | 0.249  | 2.79  | 0.00641 | 1.00 |
| merck2-AK393028_a_at       | STRBP                     | NM_018387 NM_001171137 NR_03323 | 0.294  | 2.79  | 0.00645 | 1.00 |
| merck2-CR621041_at         | FRA10AC1                  | NM_145246                       | 0.168  | 2.78  | 0.00653 | 1.00 |
| merck-NM_004660_at         | DDX3Y                     | NM_00122665 NM_004660           | -1.82  | -2.78 | 0.00653 | 1.00 |
| merck2-AK126502_at         | TRAF5                     | NM_004619 NM_145759 NM_00103391 | 0.280  | 2.78  | 0.00654 | 1.00 |
| merck-AK123757_a_at        | EBF1                      | NM_024007                       | 0.350  | 2.78  | 0.00657 | 1.00 |
| merck-D16877_at            | ---                       | NG_011791                       | 0.165  | 2.78  | 0.00657 | 1.00 |
| merck-NM_001040077_x_at    | ---                       | ---                             | 0.504  | 2.78  | 0.00663 | 1.00 |
| merck-AK057794_x_at        | LOC143666                 | NR_026967                       | -0.171 | -2.77 | 0.00674 | 1.00 |
| merck-NM_013432_at         | TONSIL                    | NM_013432                       | -0.174 | -2.77 | 0.00678 | 1.00 |
| merck-NM_002575_at         | SERPINB2                  | NM_001143818 NM_002575          | -0.321 | -2.77 | 0.00681 | 1.00 |
| merck-BC017958_at          | CDC160                    | NM_001101357                    | 0.667  | 2.77  | 0.00682 | 1.00 |
| merck-BC069446_at          | RNF185                    | BC017302                        | 0.155  | 2.77  | 0.00685 | 1.00 |
| merck2-NM_017863_s_at      | ---                       | ---                             | 0.533  | 2.76  | 0.00690 | 1.00 |
| merck-NM_001165_at         | BIRC3                     | NM_001165 NM_182962             | 0.293  | 2.76  | 0.00692 | 1.00 |
| merck-NM_004654_at         | USP9Y                     | NM_004654                       | -1.47  | -2.76 | 0.00693 | 1.00 |
| merck-BF115658_a_at        | ITGB3                     | NM_000212                       | -0.256 | -2.76 | 0.00693 | 1.00 |
| merck-NM_145802_at         | SEPT6                     | NM_145800 NM_145802             | 0.278  | 2.76  | 0.00694 | 1.00 |
| merck-NM_152732_at         | RSPH9                     | NM_152732 NM_001193341          | -0.336 | -2.76 | 0.00695 | 1.00 |
| merck-NM_031436_at         | NUDT12                    | NM_031438                       | -0.283 | -2.76 | 0.00700 | 1.00 |
| merck-AK056310_a_at        | ZAK                       | NM_133646                       | -0.167 | -2.76 | 0.00702 | 1.00 |
| merck2-NM_007071_x_at      | HHLA3                     | NM_001031693 NM_001036646 NR_02 | 0.180  | 2.76  | 0.00704 | 1.00 |
| merck-NM_032024_a_at       | C10orf11                  | NM_032024                       | -0.218 | -2.76 | 0.00704 | 1.00 |
| merck2-AK024285_at         | STRBP                     | NM_018387 NM_001171137 NR_03323 | 0.260  | 2.76  | 0.00704 | 1.00 |
| merck2-BX647065_x_at       | PGBD2                     | BX647065                        | -0.180 | -2.76 | 0.00705 | 1.00 |
| merck2-AV694034_at         | ---                       | X06096                          | -0.132 | -2.76 | 0.00705 | 1.00 |
| merck-NM_004297_a_at       | GNA14                     | NM_004297                       | -0.103 | -2.76 | 0.00706 | 1.00 |
| merck-NM_006084_at         | IRF9                      | NM_006084                       | -0.209 | -2.76 | 0.00706 | 1.00 |
| merck-NM_016539_s_at       | SIRT6                     | NM_016539 NM_001193285          | -0.195 | -2.75 | 0.00708 | 1.00 |
| merck-NM_014332_at         | SMPX                      | NM_014332                       | 0.290  | 2.75  | 0.00708 | 1.00 |
| merck-CF123899_at          | ---                       | ---                             | -0.141 | -2.75 | 0.00709 | 1.00 |
| merck-NM_138399_at         | TMEM44                    | NM_138399 NM_00101655 NM_00116  | -0.224 | -2.75 | 0.00717 | 1.00 |
| merck-AI686166_s_at        | NCRNA00185                | NR_001544                       | -0.513 | -2.75 | 0.00717 | 1.00 |
| merck-NM_005449_at         | FAIM3                     | NM_005449 NM_001142473 NM_00119 | 0.243  | 2.75  | 0.00719 | 1.00 |
| merck-BX470592_at          | SRD5A1P1                  | NR_028597                       | 0.160  | 2.75  | 0.00721 | 1.00 |
| merck-NM_007281_at         | SCRG1                     | NM_007281                       | -0.276 | -2.75 | 0.00725 | 1.00 |
| merck-AA747306_at          | BCL11A                    | NM_022893                       | 0.236  | 2.74  | 0.00727 | 1.00 |
| merck2-NM_152909_at        | ZNF548                    | NM_001172773 NM_152909          | 0.207  | 2.74  | 0.00730 | 1.00 |
| merck-NM_173512_s_at       | SLC38A11                  | NM_001199148 NM_173512          | 0.276  | 2.74  | 0.00732 | 1.00 |
| merck-NM_001039933_s_at    | CD79B                     | NM_000626 NM_021602 NM_00103993 | 0.325  | 2.74  | 0.00735 | 1.00 |
| merck-NM_174951_at         | FAM9A                     | NM_001171186 NM_174951          | 0.282  | 2.74  | 0.00739 | 1.00 |
| merck2-BC005008_at         | CEACAM6                   | NM_002483                       | -0.653 | -2.74 | 0.00739 | 1.00 |
| merck2-NM_001015001_s_at   | ---                       | ---                             | -0.277 | -2.74 | 0.00740 | 1.00 |
| merck-NM_032576_s_at       | TXLNG2P                   | NM_032576                       | -1.20  | -2.74 | 0.00741 | 1.00 |
| merck-BX115310_at          | ---                       | AC109927                        | -0.177 | -2.74 | 0.00742 | 1.00 |
| merck-NM_020142_s_at       | NDUF4A2                   | NM_020142                       | -0.182 | -2.74 | 0.00744 | 1.00 |
| merck-AK095618_a_at        | ---                       | AK095618                        | -0.208 | -2.73 | 0.00748 | 1.00 |
| merck-AK095064_at          | ---                       | AK095064                        | -0.129 | -2.73 | 0.00751 | 1.00 |
| merck2-NM_182660_at        | UTY                       | NM_182660 NM_182659 NM_007125   | -0.895 | -2.73 | 0.00751 | 1.00 |
| merck-BI491675_at          | ---                       | AF324931                        | 0.377  | 2.73  | 0.00753 | 1.00 |
| merck-AK022993_at          | ---                       | XR_112926 XR_113938             | 0.164  | 2.73  | 0.00753 | 1.00 |
| merck-ENST00000354256_a_at | TTY10                     | NR_001542                       | -0.669 | -2.73 | 0.00756 | 1.00 |
| merck-AF085872_at          | ---                       | AF085872                        | 0.183  | 2.73  | 0.00758 | 1.00 |
| merck-NM_006922_at         | SCN3A                     | NM_006922 NM_001081676 NM_00106 | 0.402  | 2.73  | 0.00762 | 1.00 |
| merck-HCT11641255_1_at     | ---                       | ---                             | -0.172 | -2.73 | 0.00763 | 1.00 |
| merck2-AA62265_s_at        | LOC100507718 LOC100509457 | XM_003119326 XM_003120269 XM_00 | -2.22  | -2.73 | 0.00764 | 1.00 |
| merck2-NM_030824_at        | ZNF442                    | NM_030824                       | 0.196  | 2.73  | 0.00765 | 1.00 |
| merck2-NM_182660_x_at      | UTY                       | NM_182660 NM_182659 NM_007125   | -0.530 | -2.73 | 0.00768 | 1.00 |
| merck2-NM_199334_at        | THRA                      | NM_199334                       | -0.245 | -2.72 | 0.00769 | 1.00 |
| merck-AL049449_at          | GAB1                      | NM_007123 NM_002039             | -0.196 | -2.72 | 0.00770 | 1.00 |
| merck-AK054601_at          | ---                       | AK054601                        | -0.149 | -2.72 | 0.00772 | 1.00 |
| merck-AB209628_at          | H1A-DQA1                  | AB209628                        | 1.02   | 2.72  | 0.00780 | 1.00 |
| merck-NM_006418_s_at       | OLF44                     | NM_006418                       | -0.923 | -2.72 | 0.00784 | 1.00 |
| merck-NM_133369_at         | UNC5A                     | NM_133369                       | -0.174 | -2.71 | 0.00792 | 1.00 |
| merck-NM_015896_at         | ZMYND10                   | NM_015896                       | -0.197 | -2.71 | 0.00794 | 1.00 |
| merck2-AF085412_at         | SLC6A5                    | NM_004211                       | -0.165 | -2.71 | 0.00795 | 1.00 |
| merck-AK093002_at          | ---                       | AK093002                        | -0.133 | -2.71 | 0.00800 | 1.00 |
| merck-ENST00000381046_at   | LOC554174                 | BC009388                        | 0.194  | 2.71  | 0.00804 | 1.00 |
| merck-AV975799_at          | ---                       | NG_016249                       | 0.266  | 2.71  | 0.00807 | 1.00 |
| merck-NM_002564_at         | P2RY2                     | NM_176072 NM_002564 NM_176071   | -0.203 | -2.71 | 0.00810 | 1.00 |
| merck-CD643907_at          | ---                       | ---                             | 0.159  | 2.71  | 0.00812 | 1.00 |
| merck-NM_006754_at         | SYPL1                     | NM_006754 NM_182715             | 0.195  | 2.70  | 0.00813 | 1.00 |
| merck2-BX648897_at         | ---                       | BX648897                        | -0.196 | -2.70 | 0.00814 | 1.00 |
| merck-CD359455_at          | ANK3                      | NM_020987 NM_001149 NM_0012044C | 0.232  | 2.70  | 0.00816 | 1.00 |
| merck-BC021710_a_at        | DDI1                      | NM_001001711                    | -0.181 | -2.70 | 0.00817 | 1.00 |
| merck-AK097122_at          | ---                       | AK097122                        | 0.206  | 2.70  | 0.00823 | 1.00 |
| merck2-R36888_at           | ---                       | ---                             | -0.188 | -2.70 | 0.00826 | 1.00 |
| merck2-BF026299_at         | ---                       | ---                             | -0.149 | -2.70 | 0.00830 | 1.00 |
| merck2-BG5291982_at        | ---                       | ---                             | 0.164  | 2.70  | 0.00833 | 1.00 |
| merck2-BC014958_at         | STAP1                     | NM_012108                       | 0.332  | 2.69  | 0.00840 | 1.00 |
| merck-NM_025040_at         | ZNF614                    | NM_025040                       | 0.189  | 2.69  | 0.00847 | 1.00 |
| merck-NM_015507_at         | EGFL6                     | NM_015507 NM_001167890          | 0.348  | 2.69  | 0.00852 | 1.00 |
| merck-BF369128_at          | ---                       | ---                             | -0.159 | -2.69 | 0.00853 | 1.00 |
| merck2-CB147469_at         | CDCA2SE2                  | NM_020240 NM_001038702          | 0.140  | 2.69  | 0.00853 | 1.00 |
| merck-NR_002914_x_at       | SNORD62A SNORD62B         | NR_002914 NR_003050             | -0.131 | -2.69 | 0.00859 | 1.00 |
| merck-NM_015210_a_at       | CDC165                    | NM_015210                       | -0.147 | -2.68 | 0.00862 | 1.00 |
| merck-BU681761_at          | KDM5C                     | EF613277                        | 0.482  | 2.68  | 0.00871 | 1.00 |
| merck-NM_001700_at         | AZU1                      | NM_001700                       | -0.374 | -2.68 | 0.00875 | 1.00 |
| merck-BX097821_at          | ---                       | AC241513                        | 0.199  | 2.68  | 0.00876 | 1.00 |
| merck-ENST00000216255_a_at | ---                       | ---                             | -0.157 | -2.68 | 0.00878 | 1.00 |
| merck2-AV975036_at         | FAIM3                     | NM_005449 NM_001142473 NM_00119 | 0.228  | 2.68  | 0.00883 | 1.00 |
| merck2-CR749861_x_at       | ---                       | ---                             | 0.367  | 2.68  | 0.00883 | 1.00 |
| merck-NM_152693_s_at       | LINC00246A LINC00246B     | NR_026595 NR_026594             | 0.233  | 2.67  | 0.00888 | 1.00 |
| merck-NM_003611_at         | OFD1                      | NM_003611                       | 0.255  | 2.67  | 0.00889 | 1.00 |
| merck-ENST00000288838_at   | ---                       | NG_024785                       | -0.741 | -2.67 | 0.00891 | 1.00 |
| merck2-BU149471_x_at       | ANKRD11                   | NM_013275                       | -0.172 | -2.67 | 0.00892 | 1.00 |
| merck-AK055261_at          | CTNBP2NL                  | NM_018704                       | -0.189 | -2.67 | 0.00893 | 1.00 |
| merck2-BQ440490_at         | HAUS2                     | NM_018097 NM_001130447          | -0.179 | -2.67 | 0.00898 | 1.00 |
| merck-BC000212_a_at        | GTF3C2                    | NM_001521 NM_001035521          | -0.160 | -2.67 | 0.00902 | 1.00 |
| merck2-BC068526_at         | FAM3C                     | NM_014888 NM_001040020          | 0.387  | 2.67  | 0.00905 | 1.00 |
| merck-ENST00000374922_at   | LOC550643                 | BX537532                        | 0.361  | 2.67  | 0.00906 | 1.00 |
| merck2-CA776414_at         | ---                       | AC008783                        | 0.209  | 2.67  | 0.00907 | 1.00 |
| merck-NM_017440_at         | EPHB2                     | NM_017449 NM_004442             | -0.240 | -2.66 | 0.00913 | 1.00 |
| merck-NM_006679_at         | ---                       | ---                             | -0.143 | -2.66 | 0.00914 | 1.00 |
| merck-AF019382_s_at        | MBL1P                     | NR_002724                       | -0.156 | -2.66 | 0.00915 | 1.00 |
| merck-NM_138737_s_at       | HEPH1                     | NM_138737 NM_014799 NM_0011308E | 0.200  | 2.66  | 0.00916 | 1.00 |
| merck-CR749861_x_at        | IGHG2                     | BX640623                        | 0.337  | 2.66  | 0.00918 | 1.00 |
| merck2-BQ428957_at         | ---                       | ---                             | 0.154  | 2.66  | 0.00920 | 1.00 |
| merck-BC043399_a_at        | ETV6                      | NM_001987                       | -0.198 | -2.66 | 0.00922 | 1.00 |
| merck-NM_002758_at         | MAP2K6                    | NM_002758                       | -0.177 | -2.66 | 0.00925 | 1.00 |
| merck-M34181_a_at          | PRKACB                    | NM_182948 NM_002731             | 0.181  | 2.66  | 0.00926 | 1.00 |
| merck-NM_172107_a_at       | KCNQ2                     | NM_172107 NM_172106 NM_004518 N | -0.163 | -2.66 | 0.00930 | 1.00 |
| merck-NM_017633_s_at       | FAM46A                    | NM_017633                       | -0.163 | -2.66 | 0.00931 | 1.00 |
| merck2-DA409317_s_at       | APLP2                     | NM_001642 NM_001142276 NM_00114 | -0.312 | -2.66 | 0.00931 | 1.00 |
| merck-ENST00000265384_s_at | TJP2                      | NM_001170630                    | -0.211 | -2.66 | 0.00932 | 1.00 |
| merck2-BQ880108_at         | ---                       | ---                             | -0.175 | -2.66 | 0.00933 | 1.00 |
| merck2-BC033623_a_at       | UNC93B1                   | NM_030930                       | -0.170 | -2.65 | 0.00935 | 1.00 |
| merck2-NM_001013706_at     | PLIN5                     | NM_001013706                    | -0.220 | -2.65 | 0.00936 | 1.00 |
| merck2-AA826176_at         | ---                       | AL109753                        | 0.608  | 2.65  | 0.00937 | 1.00 |
| merck-AIO74020_at          | ---                       | AC004066                        | 0.225  | 2.65  | 0.00942 | 1.00 |
| merck-BU684868_at          | ---                       | EF445041                        | 0.153  | 2.65  | 0.00942 | 1.00 |

|                             |                     |                                  |         |       |         |      |
|-----------------------------|---------------------|----------------------------------|---------|-------|---------|------|
| merck-AF087961_at           | ---                 | AF087961                         | -0.236  | -2.65 | 0.00943 | 1.00 |
| merck-NM_020805_at          | KLHL14              | NM_020805                        | 0.415   | 2.65  | 0.00943 | 1.00 |
| merck-NM_001747_at          | CAPG                | NM_001747                        | -0.231  | -2.65 | 0.00944 | 1.00 |
| merck-NM_017935_at          | BANK1               | NM_017935 NM_001083907 NM_00112  | 0.534   | 2.65  | 0.00945 | 1.00 |
| merck-BM98631_at            | ---                 | NG_008408                        | -0.180  | -2.65 | 0.00954 | 1.00 |
| merck2-DB333082_at          | ---                 | ---                              | 0.375   | 2.65  | 0.00957 | 1.00 |
| merck-NM_003629_at          | PIK3R3              | NM_003629 NM_001114172           | -0.260  | -2.64 | 0.00961 | 1.00 |
| merck-L06875_x_at           | ---                 | ---                              | 0.159   | 2.64  | 0.00962 | 1.00 |
| merck2-CN389891_at          | METT18              | NM_024770                        | 0.214   | 2.64  | 0.00963 | 1.00 |
| merck2-AA148029_at          | PODXL               | NM_001018111 NM_005397           | 0.178   | 2.64  | 0.00966 | 1.00 |
| merck-BX571745_a_at         | NPHP1               | NM_000272 NM_207181 NM_00112817  | 0.198   | 2.64  | 0.00967 | 1.00 |
| merck2-NM_001725_at         | BPI                 | NM_001725 XM_002345420           | -0.650  | -2.64 | 0.00970 | 1.00 |
| merck2-H00590_at            | RRAS2               | NM_012250 NM_001102669 NM_00117  | 0.209   | 2.64  | 0.00970 | 1.00 |
| merck2-BC128082_s_at        | EDARADD             | NM_145861 NM_080738              | 0.186   | 2.64  | 0.00977 | 1.00 |
| merck2-BC022823_x_at        | ---                 | AF047230                         | 0.535   | 2.64  | 0.00978 | 1.00 |
| merck-XM_942086_x_at        | UNC93B1             | NM_030930                        | -0.141  | -2.64 | 0.00979 | 1.00 |
| merck-BC010154_s_at         | NOTCH2 NOTCH2NL     | NM_024408 NM_001200001 NM_20345  | -0.202  | -2.64 | 0.00979 | 1.00 |
| merck-NM_006108_at          | SPON1               | NM_006108                        | 0.239   | 2.64  | 0.00981 | 1.00 |
| merck-NM_015284_at          | SZT2                | NM_015284                        | -0.151  | -2.63 | 0.00987 | 1.00 |
| merck-AK122755_a_at         | ZNF518B             | NM_053042                        | 0.167   | 2.63  | 0.00988 | 1.00 |
| merck2-BC012419_a_at        | CD40                | NM_001250 NM_152854              | 0.269   | 2.63  | 0.00989 | 1.00 |
| merck-BX118195_at           | ---                 | AL033376                         | -0.232  | -2.63 | 0.00990 | 1.00 |
| merck-NM_003436_at          | ZNF135              | NM_007134 NM_003436 NM_00116452  | 0.252   | 2.63  | 0.00991 | 1.00 |
| merck-ENST00000382751_at    | URB1                | NM_014825                        | -0.145  | -2.63 | 0.00991 | 1.00 |
| merck-NM_006559_at          | KHDRBS1             | NM_006559                        | 0.125   | 2.63  | 0.00995 | 1.00 |
| merck2-EF553520_at          | CD109               | NM_133493 NM_001159587 NM_00115  | -0.207  | -2.63 | 0.00996 | 1.00 |
| merck-NM_173217_s_at        | STG6AL1             | NM_173216 NM_003032 NM_173217    | 0.154   | 2.63  | 0.00997 | 1.00 |
| merck-NM_133325_at          | PHF10               | NM_018288 NM_133325              | 0.161   | 2.63  | 0.00999 | 1.00 |
| merck-BX648323_a_at         | XIST                | NR_001564                        | 0.575   | 2.63  | 0.0100  | 1.00 |
| merck-NM_006847_at          | LILRB4              | BC026309                         | -0.207  | -2.63 | 0.0101  | 1.00 |
| merck2-NM_004258_at         | CD101               | NM_004258                        | -0.264  | -2.63 | 0.0101  | 1.00 |
| merck-NM_004202_at          | TMSB4Y              | NM_004202                        | -0.687  | -2.62 | 0.0101  | 1.00 |
| merck-NM_001002916_at       | H2BFWT              | NM_001002916                     | -0.137  | -2.62 | 0.0102  | 1.00 |
| merck-NM_004473_at          | FOXE1               | NM_004473                        | 0.173   | 2.62  | 0.0102  | 1.00 |
| merck-NM_013314_at          | BLNK                | NM_013314 NM_001114094           | 0.286   | 2.62  | 0.0102  | 1.00 |
| merck-NM_000111_at          | SLC26A3             | NM_000111                        | -0.196  | -2.62 | 0.0102  | 1.00 |
| merck2-NM_001098672_at      | HEPHL1              | NM_001098672                     | 0.316   | 2.62  | 0.0102  | 1.00 |
| merck-DA9891164_a_at        | FAM114A1            | NM_138399 NR_033290              | -0.255  | -2.62 | 0.0103  | 1.00 |
| merck-AF086183_at           | ---                 | BX648817                         | -0.0992 | -2.62 | 0.0103  | 1.00 |
| merck-AK022249_at           | ---                 | AK022249                         | 0.402   | 2.62  | 0.0104  | 1.00 |
| merck2-AL833915_at          | TDRD9               | NM_153046                        | -0.293  | -2.62 | 0.0104  | 1.00 |
| merck-AK123878_s_at         | MEG3                | AK123878                         | -0.153  | -2.62 | 0.0104  | 1.00 |
| merck-BC032026_at           | ---                 | BC032026                         | 0.299   | 2.61  | 0.0105  | 1.00 |
| merck-AF527832_a_at         | TTYT20              | NR_001546                        | -0.226  | -2.61 | 0.0105  | 1.00 |
| merck-NM_005564_at          | LCN2                | NM_005564                        | -0.700  | -2.61 | 0.0106  | 1.00 |
| merck-hCT6747_at            | ---                 | NG_010722                        | -0.144  | -2.61 | 0.0106  | 1.00 |
| merck-AK094711_at           | ---                 | AK094711                         | 0.167   | 2.61  | 0.0106  | 1.00 |
| merck2-AK022858_at          | WDR3                | NM_006784                        | 0.143   | 2.61  | 0.0106  | 1.00 |
| merck2-BG939621_a_at        | C20orf30            | NM_001009923 NM_001009924 NM_01  | 0.138   | 2.61  | 0.0107  | 1.00 |
| merck2-BX648896_at          | C6orf40             | NM_214711                        | -0.138  | -2.60 | 0.0107  | 1.00 |
| merck2-ENST00000355899_at   | PLS3                | NM_005032 NM_00136025 NM_00117   | 0.247   | 2.60  | 0.0107  | 1.00 |
| merck-NM_052820_a_at        | CORO2A              | NM_003389 NM_052820              | -0.211  | -2.60 | 0.0108  | 1.00 |
| merck-NM_001040021_at       | CD14                | NM_000591 NM_001040021 NM_00117  | -0.175  | -2.60 | 0.0108  | 1.00 |
| merck-NM_006785_at          | MALT1               | NM_006785 NM_173844              | 0.186   | 2.60  | 0.0108  | 1.00 |
| merck-ENST00000331888_a_at  | MAD2L1              | NM_002358                        | -0.231  | -2.60 | 0.0109  | 1.00 |
| merck2-VZV_OKA_ORF7_at      | STRBP               | NC_001348                        | -0.114  | -2.60 | 0.0109  | 1.00 |
| merck-AL833947_a_at         | ---                 | NM_018387 NM_00117137 NR_03323   | 0.266   | 2.60  | 0.0109  | 1.00 |
| merck-ENST00000308604_s_at  | LOC541471 LINC00152 | NR_015395 NR_024373 NR_024204 NI | -0.152  | -2.60 | 0.0109  | 1.00 |
| merck-NM_006790_at          | MYOT                | NM_006790 NM_001135940           | 0.225   | 2.60  | 0.0109  | 1.00 |
| merck-BE048858_at           | ---                 | ---                              | -0.220  | -2.60 | 0.0109  | 1.00 |
| merck-NM_014246_at          | CELSR1              | NM_014246                        | 0.229   | 2.60  | 0.0109  | 1.00 |
| merck2-ENST00000390299_x_at | ---                 | AF043589                         | 0.284   | 2.59  | 0.0110  | 1.00 |
| merck-NM_000443_at          | ABCB4               | NM_000443 NM_018849 NM_018850    | 0.254   | 2.59  | 0.0110  | 1.00 |
| merck2-BC002710_at          | KLK10               | NM_002776 NM_145888 NM_0010775X  | -0.125  | -2.59 | 0.0111  | 1.00 |
| merck-NM_032714_at          | INF2                | NM_032714                        | -0.196  | -2.59 | 0.0111  | 1.00 |
| merck-BC041882_at           | ---                 | CR626222                         | 0.232   | 2.59  | 0.0112  | 1.00 |
| merck-NM_002285_at          | AFF3                | NM_002285 NM_001025108           | 0.375   | 2.59  | 0.0112  | 1.00 |
| merck-CAB43823_a_at         | NEURL               | NM_004210                        | -0.187  | -2.59 | 0.0112  | 1.00 |
| merck-AW813711_at           | ---                 | ---                              | 0.141   | 2.59  | 0.0113  | 1.00 |
| merck-AW835608_at           | ---                 | ---                              | -0.140  | -2.58 | 0.0113  | 1.00 |
| merck-NM_021783_at          | EDA2R               | NM_001199688 NM_001199689 NM_00  | 0.364   | 2.58  | 0.0114  | 1.00 |
| merck2-NM_175710_s_at       | ---                 | ---                              | -0.249  | -2.58 | 0.0114  | 1.00 |
| merck-CB067148_a_at         | PKIG                | NM_181805 NM_007066 NM_181804    | 0.226   | 2.58  | 0.0114  | 1.00 |
| merck-VZV_OKA_ORF64_s_at    | ---                 | ---                              | -0.139  | -2.58 | 0.0114  | 1.00 |
| merck-AW962377_s_at         | TXLNG2P             | AL832583                         | -0.928  | -2.58 | 0.0115  | 1.00 |
| merck-AK094554_at           | ---                 | AF454829                         | -0.162  | -2.58 | 0.0115  | 1.00 |
| merck-NM_031409_at          | CCR6                | NM_004367 NM_031409              | 0.248   | 2.58  | 0.0116  | 1.00 |
| merck-T85133_at             | ---                 | ---                              | -0.153  | -2.57 | 0.0116  | 1.00 |
| merck2-BF174540_x_at        | IGHM                | AK090464                         | 0.164   | 2.57  | 0.0116  | 1.00 |
| merck-NM_000367_at          | TPMT                | NM_000367                        | -0.156  | -2.57 | 0.0117  | 1.00 |
| merck2-CB957115_s_at        | ---                 | ---                              | -0.131  | -2.57 | 0.0117  | 1.00 |
| merck-BC015092_a_at         | PTER                | NM_001001484 NM_030664           | 0.187   | 2.57  | 0.0117  | 1.00 |
| merck-NM_005146_at          | SART1               | NM_005146                        | -0.220  | -2.57 | 0.0117  | 1.00 |
| merck-NM_022872_at          | IFI6                | NM_002038 NM_022872 NM_022873    | -0.431  | -2.57 | 0.0118  | 1.00 |
| merck2-NM_001005852_at      | TXLNG2P             | NM_001005852                     | -1.30   | -2.57 | 0.0118  | 1.00 |
| merck-BE931112_x_at         | PRKY                | Y15801                           | -0.216  | -2.57 | 0.0118  | 1.00 |
| merck-NM_006781_a_at        | C6orf10             | NM_006781                        | -0.122  | -2.57 | 0.0119  | 1.00 |
| merck2-CK621126_at          | MXR45               | NM_015419                        | 0.213   | 2.57  | 0.0119  | 1.00 |
| merck-CD624674_at           | BEAN1               | NM_001197225 NM_001197224        | -0.188  | -2.57 | 0.0119  | 1.00 |
| merck-NM_033543_s_at        | CEACAM21            | NM_001098506 NM_033543           | -0.238  | -2.57 | 0.0119  | 1.00 |
| merck-DA928692_at           | ---                 | ---                              | -0.127  | -2.56 | 0.0120  | 1.00 |
| merck2-CMV_UL54_at          | ---                 | ---                              | -0.119  | -2.56 | 0.0120  | 1.00 |
| merck-NM_032551_s_at        | KISS1R              | NM_032551                        | -0.260  | -2.56 | 0.0121  | 1.00 |
| merck-NM_002343_s_at        | LTF                 | NM_002343 NM_001199149           | -0.723  | -2.56 | 0.0121  | 1.00 |
| merck-NM_013943_at          | CLIC4               | NM_013943                        | 0.170   | 2.56  | 0.0121  | 1.00 |
| merck-NM_004345_at          | CAMP                | NM_004345                        | -0.423  | -2.56 | 0.0122  | 1.00 |
| merck2-NM_004681_at         | EIF1AY              | NM_004681                        | -1.16   | -2.56 | 0.0122  | 1.00 |
| merck-NM_006573_s_at        | TNFSF13B            | NM_006573 NM_001145645           | -0.175  | -2.56 | 0.0122  | 1.00 |
| merck2-BC130370_at          | SERPINF11           | NM_080475                        | 0.131   | 2.56  | 0.0122  | 1.00 |
| merck-BE819416_at           | ---                 | ---                              | 0.149   | 2.56  | 0.0122  | 1.00 |
| merck-NM_182922_s_at        | HEATR3              | NM_182922                        | -0.167  | -2.56 | 0.0122  | 1.00 |
| merck-NM_014689_at          | DOCK10              | NM_014689                        | 0.148   | 2.55  | 0.0122  | 1.00 |
| merck2-BX538322_at          | FGD6                | NM_018351                        | -0.209  | -2.55 | 0.0123  | 1.00 |
| merck2-BC150285_s_at        | MYO10               | NM_012334                        | -0.171  | -2.55 | 0.0123  | 1.00 |
| merck-ENST00000282333_s_at  | ZNF837              | NM_001129730 NM_138466           | 0.165   | 2.55  | 0.0123  | 1.00 |
| merck-AK128852_a_at         | ---                 | AK128852                         | -0.118  | -2.55 | 0.0123  | 1.00 |
| merck-BQ314506_at           | ---                 | ---                              | -0.197  | -2.55 | 0.0123  | 1.00 |
| merck-XM_939250_at          | C5orf65             | NM_001161546                     | -0.141  | -2.55 | 0.0124  | 1.00 |
| merck-NM_005590_at          | MRE11A              | NM_005591 NM_005590              | -0.136  | -2.55 | 0.0124  | 1.00 |
| merck2-NM_138999_at         | NETO1               | NM_138999                        | -0.109  | -2.55 | 0.0124  | 1.00 |
| merck-BF952253_at           | ---                 | ---                              | -0.159  | -2.55 | 0.0124  | 1.00 |
| merck-XM_067050_at          | ---                 | ---                              | -0.212  | -2.55 | 0.0124  | 1.00 |
| merck-NM_032536_a_at        | NTNG2               | NM_032536                        | -0.207  | -2.55 | 0.0124  | 1.00 |
| merck-NM_016541_at          | GNB3                | NM_016541                        | 0.116   | 2.55  | 0.0125  | 1.00 |
| merck2-NM_025152_a_at       | NUBPL               | NM_025152 NM_001201573 NM_0012C  | 0.175   | 2.55  | 0.0125  | 1.00 |
| merck-AK001584_a_at         | SPON1               | NM_006108                        | 0.221   | 2.55  | 0.0125  | 1.00 |
| merck2-L34717_at            | ---                 | L34717                           | 0.354   | 2.55  | 0.0125  | 1.00 |
| merck-BF511462_a_at         | LOC286071           | AK091759                         | 0.213   | 2.55  | 0.0125  | 1.00 |
| merck-AW665698_at           | ---                 | ---                              | -0.173  | -2.55 | 0.0125  | 1.00 |
| merck-NM_005429_at          | VEGFC               | NM_005429                        | -0.181  | -2.55 | 0.0125  | 1.00 |
| merck-NM_032117_at          | MND1                | NM_032117                        | -0.232  | -2.55 | 0.0126  | 1.00 |
| merck2-CF153306_at          | PIK3AP1             | NM_152309                        | -0.220  | -2.55 | 0.0126  | 1.00 |
| merck-BG756002_at           | ---                 | ---                              | -0.125  | -2.55 | 0.0126  | 1.00 |
| merck-NM_052847_s_at        | GNB7                | NM_052847                        | 0.170   | 2.54  | 0.0126  | 1.00 |
| merck-BX107845_at           | ---                 | AL031319                         | 0.256   | 2.54  | 0.0126  | 1.00 |
| merck2-F01509_at            | LIX1                | NM_153234                        | 0.170   | 2.54  | 0.0126  | 1.00 |
| merck-NM_198480_at          | ZNF615              | NM_001199324 NM_198480           | 0.170   | 2.54  | 0.0126  | 1.00 |
| merck2-AI752658_at          | ---                 | ---                              | -0.217  | -2.54 | 0.0126  | 1.00 |
| merck2-AF097709_at          | HTRA1               | NM_002775                        | -0.191  | -2.54 | 0.0127  | 1.00 |

|                            |                              |                                 |        |       |        |      |
|----------------------------|------------------------------|---------------------------------|--------|-------|--------|------|
| merck-HSS00295480_at       | ---                          | ---                             | -0.168 | -2.54 | 0.0127 | 1.00 |
| merck-ENST0000294993_at    | ---                          | AK023372                        | -0.148 | -2.54 | 0.0127 | 1.00 |
| merck-NM_002123_x_at       | LOC100293977                 | XM_003120273 XM_001714067 XM_00 | -0.810 | -2.54 | 0.0127 | 1.00 |
| merck-AI071847_s_at        | ---                          | AC007845                        | 0.216  | 2.54  | 0.0128 | 1.00 |
| merck-AK130566_at          | ---                          | AK130566                        | -0.249 | -2.54 | 0.0128 | 1.00 |
| merck-AI052248_a_at        | VHL                          | NM_000551 NM_198156             | -0.165 | -2.54 | 0.0128 | 1.00 |
| merck2-AI813659_at         | ---                          | AC093873                        | -0.133 | -2.54 | 0.0128 | 1.00 |
| merck-NM_001011658_at      | TRAPPC2                      | NM_001011658 NM_014563 NM_00112 | 0.188  | 2.54  | 0.0128 | 1.00 |
| merck-NM_001029894_at      | PLEKHG1                      | NM_001029894                    | 0.288  | 2.54  | 0.0128 | 1.00 |
| merck-ENST00000326474_at   | EIF4B                        | AF119854                        | 0.147  | 2.54  | 0.0129 | 1.00 |
| merck-CB164481_at          | ---                          | AC131182                        | -0.322 | -2.53 | 0.0129 | 1.00 |
| merck-BC067869_at          | LOC441493                    | XR_113304                       | 0.235  | 2.53  | 0.0129 | 1.00 |
| merck-ENST0000334516_a_at  | KDMA6A                       | NM_021140                       | 0.297  | 2.53  | 0.0129 | 1.00 |
| merck2-R70164_at           | ---                          | ---                             | -0.232 | -2.53 | 0.0130 | 1.00 |
| merck2-NM_001098825_at     | TMEM91                       | NM_001042595 NM_001098825       | -0.143 | -2.53 | 0.0130 | 1.00 |
| merck-BF891877_at          | ---                          | ---                             | -0.140 | 2.53  | 0.0130 | 1.00 |
| merck-XM_212532_at         | ---                          | ---                             | -0.176 | -2.53 | 0.0131 | 1.00 |
| merck-NM_001002247_at      | ANAPC11                      | NM_001002244 NM_016476 NM_0010C | -0.181 | -2.53 | 0.0131 | 1.00 |
| merck2-BE220053_at         | ---                          | AF057280                        | -0.203 | -2.53 | 0.0131 | 1.00 |
| merck-NM_003919_at         | SGCE                         | NM_001099401 NM_003919 NM_0010C | 0.262  | 2.53  | 0.0132 | 1.00 |
| merck-NM_203458_at         | NOTCH2NL                     | NM_203458                       | -0.204 | -2.53 | 0.0132 | 1.00 |
| merck-BF109132_at          | ---                          | AL355796                        | -0.153 | 2.53  | 0.0132 | 1.00 |
| merck2-BX396168_a_at       | PLSCR1                       | NM_021105                       | -0.284 | -2.53 | 0.0133 | 1.00 |
| merck-BF594635_s_at        | PAQR5                        | NM_00104554 NM_017705           | -0.135 | -2.52 | 0.0133 | 1.00 |
| merck-NM_001025463_at      | LOC284751                    | NR_034124                       | -0.191 | -2.52 | 0.0133 | 1.00 |
| merck2-NM_008061_at        | CRISP3                       | NM_006061 NM_001190986          | -0.607 | -2.52 | 0.0133 | 1.00 |
| merck-BC034402_a_at        | RBM47                        | NM_001098634 NM_019027          | -0.285 | -2.52 | 0.0134 | 1.00 |
| merck-BC022823_x_at        | ---                          | ---                             | 0.412  | 2.52  | 0.0134 | 1.00 |
| merck-XM_927287_s_at       | ---                          | AC008783                        | 0.249  | 2.52  | 0.0134 | 1.00 |
| merck-XM_930134_x_at       | ---                          | ---                             | -0.132 | -2.52 | 0.0134 | 1.00 |
| merck-NM_144622_at         | ---                          | ---                             | -0.135 | -2.52 | 0.0134 | 1.00 |
| merck-BM979088_s_at        | ATRX                         | NM_000489 NM_138270             | 0.160  | 2.52  | 0.0134 | 1.00 |
| merck-ENST0000326985_s_at  | RBMY1A1 RBMY1B RBMY1D RBMY1E | NM_000558 NM_001006121 NM_0010C | -0.149 | -2.52 | 0.0134 | 1.00 |
| merck-NM_004258_at         | CD101                        | NM_004258                       | -0.215 | -2.52 | 0.0134 | 1.00 |
| merck-AK125162_at          | ---                          | AK125162                        | 0.130  | 2.52  | 0.0135 | 1.00 |
| merck-NM_001039900_at      | ---                          | AK130368                        | 0.479  | 2.52  | 0.0135 | 1.00 |
| merck2-BG202125_at         | ---                          | ---                             | -0.231 | -2.52 | 0.0136 | 1.00 |
| merck-NM_001040070_x_at    | ---                          | BC031259                        | 0.357  | 2.52  | 0.0136 | 1.00 |
| merck-NM_022831_a_at       | AIDA                         | NM_022831                       | 0.160  | 2.51  | 0.0137 | 1.00 |
| merck2-NM_001024074_at     | HNMT                         | NM_001024074                    | -0.310 | -2.51 | 0.0137 | 1.00 |
| merck-NM_175726_at         | ILSRA                        | NM_000564 NM_175726             | -0.159 | -2.51 | 0.0137 | 1.00 |
| merck2-NM_018538_a_at      | ERMAP                        | NM_001017922 NM_018538          | -0.243 | -2.51 | 0.0137 | 1.00 |
| merck2-NM_024005_at        | ---                          | ---                             | 0.236  | 2.51  | 0.0137 | 1.00 |
| merck-CX762565_s_at        | NAAA                         | NM_014435 NM_001042402          | -0.229 | -2.51 | 0.0138 | 1.00 |
| merck-NM_018081_s_at       | WRAP53                       | NM_018081 NM_001143990 NM_00114 | -0.226 | -2.51 | 0.0138 | 1.00 |
| merck-U92981_at            | ---                          | U92981                          | 0.299  | 2.51  | 0.0138 | 1.00 |
| merck-AK090788_s_at        | DNM1L                        | NM_012062 NM_012063 NM_005690   | 0.129  | 2.51  | 0.0138 | 1.00 |
| merck2-CB241297_at         | ---                          | ---                             | 0.286  | 2.51  | 0.0138 | 1.00 |
| merck2-BQ068166_s_at       | ---                          | ---                             | -0.208 | -2.51 | 0.0139 | 1.00 |
| merck2-BC026213_at         | FBXWY11                      | NM_033645 NM_033644 NM_012300   | 0.101  | 2.51  | 0.0139 | 1.00 |
| merck-ENST0000209650_at    | TRIM66                       | NM_014818                       | -0.303 | -2.51 | 0.0139 | 1.00 |
| merck-AF322230_a_at        | TTYT3 TTYT3B                 | NR_001524 NR_002176             | -0.165 | -2.51 | 0.0139 | 1.00 |
| merck2-AL833067_at         | ---                          | AL833067                        | 0.154  | 2.51  | 0.0140 | 1.00 |
| merck2-NM_032042_at        | FAM172A                      | NM_032042 NM_001163417 NM_00116 | 0.109  | 2.50  | 0.0140 | 1.00 |
| merck2-NM_001037501_s_at   | ---                          | ---                             | -0.112 | -2.50 | 0.0140 | 1.00 |
| merck-AK000215_a_at        | PGPEP1                       | NM_017712                       | -0.197 | -2.50 | 0.0140 | 1.00 |
| merck-AF196865_at          | BPESCI                       | NR_026783                       | -0.124 | -2.50 | 0.0141 | 1.00 |
| merck-BE567163_at          | ---                          | ---                             | -0.124 | -2.50 | 0.0141 | 1.00 |
| merck-AY367054_a_at        | FGD4                         | NM_139241                       | -0.227 | -2.50 | 0.0141 | 1.00 |
| merck-NM_138441_s_at       | MB21D1                       | NM_138441                       | -0.211 | -2.50 | 0.0141 | 1.00 |
| merck-ENST00000382880_x_at | ---                          | EF589510                        | 0.415  | 2.50  | 0.0141 | 1.00 |
| merck-AF442151_a_at        | RSAD2                        | NM_080657                       | -0.658 | -2.50 | 0.0142 | 1.00 |
| merck-ENST00000307008_x_at | SSX2                         | BC103863                        | 0.392  | 2.50  | 0.0142 | 1.00 |
| merck-AJ133123_a_at        | ADCY9                        | NM_001116                       | -0.179 | -2.50 | 0.0142 | 1.00 |
| merck-AA447325_at          | ---                          | ---                             | 0.186  | 2.50  | 0.0142 | 1.00 |
| merck-HCT1648089_3_at      | ---                          | NG_005626                       | -0.128 | -2.50 | 0.0142 | 1.00 |
| merck-NM_002578_at         | PAK3                         | NM_001128166 NM_002578 NM_00112 | 0.636  | 2.50  | 0.0143 | 1.00 |
| merck2-AK093852_at         | LTF                          | NM_002343 NM_001199149          | -0.725 | -2.50 | 0.0143 | 1.00 |
| merck-AK128024_a_at        | ---                          | AY598347                        | -1.17  | -2.50 | 0.0143 | 1.00 |
| merck-NM_152909_at         | ZNF548                       | NM_001172773 NM_152909          | 0.181  | 2.50  | 0.0143 | 1.00 |
| merck-NM_001001686_at      | ---                          | AK125858                        | 0.263  | 2.50  | 0.0144 | 1.00 |
| merck2-BF681579_at         | ---                          | ---                             | -0.116 | -2.49 | 0.0144 | 1.00 |
| merck-NM_004655_at         | AXIN2                        | NM_004655                       | 0.255  | 2.49  | 0.0144 | 1.00 |
| merck-NM_004881_at         | TP53B3                       | NM_004881 NM_147184             | -0.274 | -2.49 | 0.0144 | 1.00 |
| merck-XM_926634_at         | RABL3                        | NM_173825                       | 0.198  | 2.49  | 0.0144 | 1.00 |
| merck-NM_032178_at         | SLC7A6OS                     | NM_032178                       | 0.220  | 2.49  | 0.0145 | 1.00 |
| merck-NM_013378_at         | VPREB3                       | NM_013378                       | 0.407  | 2.49  | 0.0145 | 1.00 |
| merck-T68445_a_at          | ---                          | AL356358                        | 0.269  | 2.49  | 0.0145 | 1.00 |
| merck-NM_144580_at         | C1orf85                      | NM_144580                       | -0.286 | -2.49 | 0.0145 | 1.00 |
| merck-NM_004240_at         | TRIP10                       | NM_004240                       | -0.194 | -2.49 | 0.0145 | 1.00 |
| merck-ENST0000206491_at    | ---                          | ---                             | -0.125 | -2.49 | 0.0145 | 1.00 |
| merck2-AA448172_at         | ---                          | AC127512                        | -0.223 | -2.49 | 0.0146 | 1.00 |
| merck-BC057761_a_at        | CCDC149                      | NM_173463 NM_001130726          | -0.381 | -2.49 | 0.0146 | 1.00 |
| merck-ENST00000378271_a_at | DCLRE1C                      | NM_001033855 NM_022487 NM_0010C | -0.116 | -2.49 | 0.0146 | 1.00 |
| merck-BI256526_x_at        | RPS4X                        | NM_001007                       | 0.0996 | 2.49  | 0.0146 | 1.00 |
| merck-NM_000044_a_at       | AR                           | NM_000044 NM_001011645          | 0.306  | 2.49  | 0.0146 | 1.00 |
| merck-NM_152497_at         | STMN1                        | NM_001114564                    | -0.221 | -2.49 | 0.0147 | 1.00 |
| merck2-AK128466_at         | ---                          | AK128466                        | 0.157  | 2.49  | 0.0147 | 1.00 |
| merck-AK026286_at          | ---                          | AK026286                        | -0.228 | -2.49 | 0.0147 | 1.00 |
| merck-BX500576_at          | ---                          | ---                             | -0.183 | -2.48 | 0.0148 | 1.00 |
| merck-ENST00000340515_at   | FAM160A1                     | NM_001109977                    | 0.154  | 2.48  | 0.0148 | 1.00 |
| merck-BE672690_at          | ---                          | ---                             | -0.213 | -2.48 | 0.0148 | 1.00 |
| merck-AK129777_x_at        | ---                          | ---                             | 0.529  | 2.48  | 0.0148 | 1.00 |
| merck-NM_198472_at         | C10orf125                    | NM_001098483 NM_198472          | -0.193 | -2.48 | 0.0149 | 1.00 |
| merck-BX420480_a_at        | PTN                          | NM_002825                       | -0.173 | -2.48 | 0.0149 | 1.00 |
| merck-NR_003029_x_at       | SNORD9                       | NR_003029                       | -0.195 | -2.48 | 0.0149 | 1.00 |
| merck2-NM_012334_at        | MYO10                        | NM_012334                       | -0.140 | -2.48 | 0.0149 | 1.00 |
| merck2-BM974460_at         | LOC100507493                 | XR_110882 XR_113132 XR_114149   | 0.228  | 2.48  | 0.0150 | 1.00 |
| merck-ENST00000313276_at   | ---                          | AF399356                        | -0.180 | -2.48 | 0.0150 | 1.00 |
| merck-ENST00000229824_at   | ---                          | ---                             | -0.208 | -2.48 | 0.0150 | 1.00 |
| merck-AJ519332_x_at        | ---                          | ---                             | -0.125 | -2.48 | 0.0150 | 1.00 |
| merck-NM_182659_a_at       | UTY                          | NM_182659 NM_007125             | -0.612 | -2.48 | 0.0150 | 1.00 |
| merck-NM_003282_at         | TNNI2                        | NM_003282 NM_001145829 NM_00114 | -0.279 | -2.48 | 0.0150 | 1.00 |
| merck-NM_001567_s_at       | INPPL1                       | NM_001567                       | -0.192 | -2.48 | 0.0151 | 1.00 |
| merck2-CHV_LUL35_at        | ---                          | ---                             | -0.132 | -2.48 | 0.0151 | 1.00 |
| merck2-AK057023_at         | LOC100290566                 | XR_109384 XR_111701 XR_115104   | -0.152 | -2.48 | 0.0151 | 1.00 |
| merck-AK027209_at          | ---                          | AK027209                        | -0.200 | -2.47 | 0.0151 | 1.00 |
| merck-AK054695_at          | LAS1L                        | AK074087                        | -0.215 | -2.47 | 0.0152 | 1.00 |
| merck-NM_144718_at         | SPICE1                       | NM_144718                       | 0.152  | 2.47  | 0.0152 | 1.00 |
| merck-AI209259_at          | TRPC5                        | AB209259                        | 0.540  | 2.47  | 0.0152 | 1.00 |
| merck2-BC011819_at         | DDX3X                        | NM_001356 NM_001193416 NM_00119 | 0.166  | 2.47  | 0.0152 | 1.00 |
| merck-XM_377230_at         | ---                          | AC203597                        | -0.202 | -2.47 | 0.0152 | 1.00 |
| merck-BC015129_at          | ---                          | BC015129                        | -0.162 | -2.47 | 0.0153 | 1.00 |
| merck-NM_001835_at         | CLTCL1                       | NM_007098 NM_001835             | -0.287 | -2.47 | 0.0153 | 1.00 |
| merck-NM_182538_at         | SPNS3                        | NM_182538                       | -0.292 | -2.47 | 0.0153 | 1.00 |
| merck2-DG82828_a_at        | SAP30                        | NM_003864                       | -0.171 | -2.47 | 0.0153 | 1.00 |
| merck2-DN919376_a_at       | ZC3H13                       | NM_0015070                      | -0.194 | -2.47 | 0.0153 | 1.00 |
| merck-ENST00000206681_at   | ---                          | ---                             | 0.340  | 2.47  | 0.0153 | 1.00 |
| merck-ENST00000375169_at   | WNK3                         | NM_020922 NM_001002838          | 0.475  | 2.47  | 0.0153 | 1.00 |
| merck-NM_003121_at         | SPIB                         | NM_003121                       | 0.357  | 2.47  | 0.0153 | 1.00 |
| merck-BC020226_a_at        | HLA-DOB                      | NM_002120                       | 0.217  | 2.47  | 0.0154 | 1.00 |
| merck-BC033178_x_at        | ---                          | ---                             | 0.539  | 2.47  | 0.0154 | 1.00 |
| merck2-BP196448_at         | ---                          | AY869727                        | -0.189 | -2.47 | 0.0154 | 1.00 |
| merck-AK074440_at          | ---                          | AK074440                        | 0.221  | 2.47  | 0.0154 | 1.00 |
| merck2-NM_133439_at        | TADA2A                       | NM_001488 NM_133439 NM_0011661C | -0.135 | -2.47 | 0.0155 | 1.00 |
| merck2-BC062574_at         | NPHP1                        | NM_000272 NM_207181 NM_00112817 | 0.185  | 2.47  | 0.0155 | 1.00 |
| merck-BQ361926_at          | ---                          | ---                             | -0.108 | -2.47 | 0.0155 | 1.00 |
| merck2-ENST0000026866_at   | BPNT1                        | NM_006085                       | 0.141  | 2.47  | 0.0155 | 1.00 |
| merck-DR432803_a_at        | FAM40B                       | NM_020704 NM_001134336          | -0.136 | -2.47 | 0.0155 | 1.00 |

|                             |                 |                                 |         |       |        |      |
|-----------------------------|-----------------|---------------------------------|---------|-------|--------|------|
| merck-AF086222_at           | ---             | AF086222                        | -0.145  | -2.47 | 0.0155 | 1.00 |
| merck2-AL833454_at          | SFXN5           | AL833454                        | -0.174  | -2.47 | 0.0155 | 1.00 |
| merck-AW138771_a_at         | TRIM66          | NM_014618                       | -0.124  | -2.46 | 0.0156 | 1.00 |
| merck2-AF400505_at          | CLECTA          | NM_197947 NM_197948             | -0.217  | -2.46 | 0.0156 | 1.00 |
| merck-NM_000256_at          | MYBPC3          | NM_000256                       | -0.198  | -2.46 | 0.0156 | 1.00 |
| merck2-CA438250_at          | PARM1           | NM_015393                       | 0.206   | 2.46  | 0.0156 | 1.00 |
| merck-BE669821_at           | USP27X          | NM_001145073                    | 0.245   | 2.46  | 0.0157 | 1.00 |
| merck-NM_014048_at          | MKL2            | NM_014048                       | 0.209   | 2.46  | 0.0157 | 1.00 |
| merck-AF070581_a_at         | GPR183          | AF070581                        | 0.309   | 2.46  | 0.0157 | 1.00 |
| merck2-BE698643_x_at        | USP24           | NM_015306                       | -0.226  | -2.46 | 0.0157 | 1.00 |
| merck2-VZV_OKA_O67_up_at    | ---             | ---                             | -0.127  | -2.46 | 0.0157 | 1.00 |
| merck-NM_207468_at          | FAM177B         | NM_207468                       | 0.326   | 2.46  | 0.0157 | 1.00 |
| merck-AJ420434_at           | NRARP           | NM_001004354                    | -0.181  | -2.46 | 0.0158 | 1.00 |
| merck2-NM_001010982_x_at    | AFMID           | NM_001145526 NM_001010982       | -0.160  | -2.46 | 0.0158 | 1.00 |
| merck-NM_004951_at          | ---             | NM_004951                       | 0.260   | 2.46  | 0.0159 | 1.00 |
| merck-NM_005392_s_at        | MAGEA3 MAGEA6   | NM_005392 NM_005363 NM_175868   | 0.244   | 2.46  | 0.0159 | 1.00 |
| merck-NM_175617_at          | MT1E            | NM_175617                       | -0.158  | -2.46 | 0.0159 | 1.00 |
| merck-AK025887_at           | ---             | AK025887                        | -0.182  | -2.46 | 0.0159 | 1.00 |
| merck-XM_496062_x_at        | LOC653075       | NR_033933                       | 0.209   | 2.46  | 0.0159 | 1.00 |
| merck2-Rota_G3_s10_s_at     | ---             | ---                             | -0.103  | -2.46 | 0.0160 | 1.00 |
| merck-NM_021821_at          | MRPS35          | NM_021821 NM_001190864          | 0.161   | 2.45  | 0.0160 | 1.00 |
| merck-Contig66529_RC_at     | ---             | ---                             | -0.144  | -2.45 | 0.0160 | 1.00 |
| merck2-AW814840_x_at        | ---             | ---                             | 0.103   | 2.45  | 0.0161 | 1.00 |
| merck2-NM_017940_s_at       | ---             | ---                             | -0.111  | -2.45 | 0.0161 | 1.00 |
| merck-ENST00000378670_a_at  | UQCRCQ          | NM_014402                       | -0.207  | -2.45 | 0.0161 | 1.00 |
| merck-BC047330_at           | ---             | ---                             | 0.152   | 2.45  | 0.0161 | 1.00 |
| merck2-BE464047_at          | ALDOB           | NM_000035                       | 0.203   | 2.45  | 0.0162 | 1.00 |
| merck-NM_001400_at          | S1PR1           | NM_001400                       | 0.203   | 2.45  | 0.0162 | 1.00 |
| merck-AW973537_at           | ---             | NG_015661                       | 0.393   | 2.45  | 0.0163 | 1.00 |
| merck-AF086064_at           | ---             | ---                             | 0.212   | 2.45  | 0.0163 | 1.00 |
| merck2-AK123319_at          | NETO1           | NM_138966                       | 0.179   | 2.45  | 0.0163 | 1.00 |
| merck-hCT1643393_2_at       | ---             | ---                             | -0.110  | -2.45 | 0.0163 | 1.00 |
| merck-NM_203287_x_at        | PSG11           | NM_002785 NM_203287 NM_00111341 | 0.130   | 2.45  | 0.0163 | 1.00 |
| merck2-NM_001931_at         | DLAT            | NM_001931                       | 0.247   | 2.45  | 0.0163 | 1.00 |
| merck-X03068_x_at           | HLA-DQB1        | NM_002123 XM_003119997 XM_00312 | 0.938   | 2.45  | 0.0164 | 1.00 |
| merck-BC016381_x_at         | IGHG1           | Y17957                          | 0.488   | 2.45  | 0.0164 | 1.00 |
| merck-ENST00000378925_s_at  | WWC2            | NM_024949                       | -0.167  | -2.45 | 0.0164 | 1.00 |
| merck-NM_014806_at          | RUSC2           | NM_001135999 NM_014806          | -0.142  | -2.45 | 0.0164 | 1.00 |
| merck-BG495163_at           | ---             | ---                             | 0.129   | 2.44  | 0.0164 | 1.00 |
| merck2-NM_017817_at         | RAB20           | NM_017817                       | -0.298  | -2.44 | 0.0164 | 1.00 |
| merck2-AF379636_s_at        | ---             | ---                             | -0.109  | -2.44 | 0.0164 | 1.00 |
| merck-AK074192_at           | ---             | AK074192                        | -0.204  | -2.44 | 0.0164 | 1.00 |
| merck-AK130615_at           | ---             | AK130615                        | 0.171   | 2.44  | 0.0164 | 1.00 |
| merck-ENST00000326237_at    | LOC442075       | XR_110030 XR_112457 XR_113459   | 0.141   | 2.44  | 0.0164 | 1.00 |
| merck-BC043572_at           | LOC359874       | BC043572                        | -0.251  | -2.44 | 0.0165 | 1.00 |
| merck-NM_001821_at          | CHML            | NM_001821                       | 0.273   | 2.44  | 0.0166 | 1.00 |
| merck-NM_001572_at          | IRF7            | NM_001572 NM_004029 NM_004031   | -0.321  | -2.44 | 0.0166 | 1.00 |
| merck-NM_138439_at          | FLYWCH2         | NM_138439 NM_001142499 NM_00114 | -0.138  | -2.44 | 0.0167 | 1.00 |
| merck-CB962149_at           | ---             | AL132795                        | 0.212   | 2.44  | 0.0167 | 1.00 |
| merck-hCT1651059_3_at       | C14orf28        | NG_001122                       | -0.122  | -2.44 | 0.0168 | 1.00 |
| merck-NM_0010171922_at      | LGALS3BP        | NM_0010171923                   | 0.182   | 2.44  | 0.0168 | 1.00 |
| merck-AL544754_a_at         | ---             | NM_005567                       | -0.180  | -2.44 | 0.0168 | 1.00 |
| merck-NM_002852_at          | PTX3            | NM_002852                       | -0.202  | -2.44 | 0.0168 | 1.00 |
| merck2-BX281223_at          | SCN3A           | NM_006922 NM_001081676 NM_00108 | 0.120   | 2.44  | 0.0168 | 1.00 |
| merck-ENST00000382764_at    | ---             | AK026367                        | -0.126  | -2.44 | 0.0168 | 1.00 |
| merck-AI733562_at           | ---             | U10116                          | -0.239  | -2.43 | 0.0168 | 1.00 |
| merck-NM_024506_at          | GLB1L           | NM_024506                       | -0.362  | -2.43 | 0.0169 | 1.00 |
| merck-XM_291763_s_at        | E1F3L           | NM_016091                       | 0.126   | 2.43  | 0.0169 | 1.00 |
| merck2-AI659225_at          | ---             | AL627402                        | 0.190   | 2.43  | 0.0169 | 1.00 |
| merck-NM_032880_at          | IGSF21          | NM_032880                       | -0.139  | -2.43 | 0.0169 | 1.00 |
| merck2-L37307_x_at          | ---             | U07546                          | 0.343   | 2.43  | 0.0170 | 1.00 |
| merck-NM_003770_at          | KRT37           | NM_003770                       | -0.119  | -2.43 | 0.0171 | 1.00 |
| merck-EX091412_at           | ---             | AL772392                        | 0.430   | 2.43  | 0.0171 | 1.00 |
| merck2-BG959880_at          | ---             | ---                             | -0.160  | -2.43 | 0.0171 | 1.00 |
| merck-AF024541_a_at         | AFF1            | NM_001166893 NM_005935          | -0.178  | -2.43 | 0.0171 | 1.00 |
| merck-ENST00000329684_a_at  | TTY8 TTTY8B     | NR_001533 NR_003591             | -0.389  | -2.43 | 0.0171 | 1.00 |
| merck-NM_004065_at          | CDR1            | NM_004065                       | 0.532   | 2.43  | 0.0171 | 1.00 |
| merck-NM_201437_at          | TCEA1           | NM_006756 NM_201437             | 0.149   | 2.43  | 0.0171 | 1.00 |
| merck-NM_005180_at          | BMH1 COMMD3-BM1 | NM_005180 NM_001204062          | 0.223   | 2.43  | 0.0171 | 1.00 |
| merck-NM_005296_at          | LPAR4           | NM_005296                       | 0.654   | 2.43  | 0.0171 | 1.00 |
| merck-CR936684_a_at         | UTY             | NM_007125                       | -0.738  | -2.43 | 0.0171 | 1.00 |
| merck-NM_024122_at          | APOO            | NM_024122 NR_026545             | 0.275   | 2.43  | 0.0171 | 1.00 |
| merck-AK127655_at           | LOC100131231    | AK127655                        | -0.191  | -2.43 | 0.0172 | 1.00 |
| merck2-NM_002483_at         | CEACAM6         | NM_002483                       | -0.556  | -2.43 | 0.0172 | 1.00 |
| merck2-BX473738_x_at        | TNPO1           | NM_002270 NM_153188             | -0.098  | -2.43 | 0.0172 | 1.00 |
| merck-NM_152785_at          | GCET2           | NM_152785 NM_001190259 NM_00119 | 0.212   | 2.43  | 0.0172 | 1.00 |
| merck-NM_006061_at          | CRISP3          | NM_006061 NM_001190986          | -0.579  | -2.42 | 0.0173 | 1.00 |
| merck2-BC013329_a_at        | DPP4            | NM_001935                       | 0.192   | 2.42  | 0.0173 | 1.00 |
| merck-BC022384_at           | ---             | BC022384                        | -0.216  | -2.42 | 0.0173 | 1.00 |
| merck-NM_002760_at          | PRKY            | NR_028062                       | -0.546  | -2.42 | 0.0173 | 1.00 |
| merck-DA818672_a_at         | BANK1           | NM_017935 NM_001083907 NM_00112 | 0.310   | 2.42  | 0.0174 | 1.00 |
| merck-NM_001804_at          | CDX1            | NM_001804                       | -0.154  | -2.42 | 0.0174 | 1.00 |
| merck2-BU147541_at          | BUB3            | NM_004725                       | 0.160   | 2.42  | 0.0174 | 1.00 |
| merck-NM_001013722_at       | TNRC18          | AY129022                        | -0.177  | -2.42 | 0.0174 | 1.00 |
| merck-NM_001989_at          | EVX1            | NM_001989                       | -0.153  | -2.42 | 0.0175 | 1.00 |
| merck-NM_203504_s_at        | G3BP2           | NM_203505 NM_012297 NM_203504   | 0.149   | 2.42  | 0.0175 | 1.00 |
| merck2-BH740515_at          | PRR1H           | NM_018304                       | -0.164  | -2.42 | 0.0175 | 1.00 |
| merck2-AI278965_at          | ---             | ---                             | -0.241  | -2.42 | 0.0176 | 1.00 |
| merck-hsa-mir-507_x_at      | MIR507          | NR_030234                       | 0.182   | 2.42  | 0.0176 | 1.00 |
| merck-NM_001715_at          | BLK             | NM_001715                       | 0.244   | 2.42  | 0.0176 | 1.00 |
| merck2-NM_000051_at         | ATM             | NM_000051                       | 0.175   | 2.42  | 0.0176 | 1.00 |
| merck-BC047127_at           | ---             | AL035417                        | -0.150  | -2.42 | 0.0176 | 1.00 |
| merck-AF119870_at           | ---             | AF119870                        | -0.190  | -2.42 | 0.0176 | 1.00 |
| merck2-AB033049_at          | ANKRD50         | NM_020337 NM_001167882          | -0.214  | -2.42 | 0.0176 | 1.00 |
| merck2-BQ185231_at          | USP9X           | NM_001039590 NM_001039591       | 0.214   | 2.42  | 0.0176 | 1.00 |
| merck2-AF379635_s_at        | ---             | ---                             | -0.105  | -2.42 | 0.0177 | 1.00 |
| merck-NM_015257_at          | TMEM194A        | NM_001130963 NM_015257          | 0.181   | 2.42  | 0.0177 | 1.00 |
| merck-NM_032505_at          | KBTB08          | NM_032505                       | 0.245   | 2.41  | 0.0177 | 1.00 |
| merck2-DA829519_a_at        | ZC3H13          | NM_015070                       | -0.191  | -2.41 | 0.0178 | 1.00 |
| merck-NM_007362_at          | NCBP2           | NM_007362 NM_001042540          | 0.175   | 2.41  | 0.0178 | 1.00 |
| merck2-NM_139290_at         | ANGPT1          | BC029406                        | -0.147  | -2.41 | 0.0178 | 1.00 |
| merck-ENST00000361688_at    | ---             | ---                             | -0.132  | -2.41 | 0.0179 | 1.00 |
| merck-ENST00000357972_at    | SYTL5           | NM_138780 NM_001163335 NM_00116 | 0.253   | 2.41  | 0.0179 | 1.00 |
| merck-AK098425_s_at         | ---             | AK098425                        | 0.169   | 2.41  | 0.0179 | 1.00 |
| merck2-NM_018555_at         | ZNF331          | NM_018555 NM_001079906 NM_00107 | 0.171   | 2.41  | 0.0179 | 1.00 |
| merck2-BG566231_at          | ---             | ---                             | -0.118  | -2.41 | 0.0179 | 1.00 |
| merck-AK055048_at           | ---             | AK055048                        | 0.271   | 2.41  | 0.0179 | 1.00 |
| merck-NM_002002_at          | FCER2           | NM_002002                       | 0.296   | 2.41  | 0.0179 | 1.00 |
| merck-NM_019555_at          | ARHGFE3         | NM_001128615 NM_001128616 NM_01 | 0.174   | 2.41  | 0.0180 | 1.00 |
| merck-BC062745_at           | ---             | BC062745                        | 0.447   | 2.41  | 0.0180 | 1.00 |
| merck-AY358684_at           | GNP2            | AY358684                        | -0.135  | -2.41 | 0.0180 | 1.00 |
| merck-NM_001014979_at       | C16orf93        | NM_001014979                    | -0.197  | -2.41 | 0.0180 | 1.00 |
| merck-AW611782_at           | ---             | ---                             | 0.300   | 2.41  | 0.0180 | 1.00 |
| merck-ZZ2965_s_at           | ---             | M90482                          | 0.232   | 2.41  | 0.0180 | 1.00 |
| merck-NM_032918_at          | RERG            | NM_032918 NM_001190726          | 0.105   | 2.41  | 0.0180 | 1.00 |
| merck-NM_007148_at          | RNF12           | NM_007148                       | -0.146  | -2.41 | 0.0180 | 1.00 |
| merck2-AK054757_at          | TBCD            | AK129619                        | -0.172  | -2.41 | 0.0180 | 1.00 |
| merck-BM805635_at           | ---             | ---                             | 0.112   | 2.41  | 0.0180 | 1.00 |
| merck-NC_001526_ORF_1178_at | ---             | ---                             | -0.0964 | -2.41 | 0.0180 | 1.00 |
| merck-NM_002003_at          | FCN1            | NM_002003                       | -0.151  | -2.41 | 0.0180 | 1.00 |
| merck-NM_006669_s_at        | LILRB1          | NM_006669 NM_001081637 NM_00108 | -0.186  | -2.41 | 0.0181 | 1.00 |
| merck-NM_001862_at          | CRHPBP          | NM_001862                       | -0.170  | -2.41 | 0.0181 | 1.00 |
| merck-AA773342_x_at         | ---             | ---                             | -0.138  | -2.41 | 0.0181 | 1.00 |
| merck-NM_000216_at          | KAL1            | NM_000216                       | -0.275  | -2.40 | 0.0182 | 1.00 |
| merck-BC016940_s_at         | ---             | ---                             | 0.300   | 2.40  | 0.0182 | 1.00 |
| merck2-CA748516_at          | FGD4            | NM_139241                       | -0.185  | -2.40 | 0.0182 | 1.00 |
| merck-NM_001037232_a_at     | ZNF829          | NM_001171979 NM_001037232       | -0.100  | -2.40 | 0.0183 | 1.00 |
| merck-AF527833_s_at         | TTY21 TTTY21B   | NR_001535 NR_003588             | -0.161  | -2.40 | 0.0183 | 1.00 |
| merck-AK123814_s_at         | POM121 POM121C  | NM_172020 NM_001099415          | 0.143   | 2.40  | 0.0183 | 1.00 |

|                             |                   |                                 |        |       |        |      |
|-----------------------------|-------------------|---------------------------------|--------|-------|--------|------|
| merck-NM_024820_a_at        | DENND1A           | NM_020946 NM_024820             | -0.173 | -2.40 | 0.0183 | 1.00 |
| merck2-BX349325_at          | PRR11             | NM_018304                       | -0.181 | -2.40 | 0.0184 | 1.00 |
| merck2-KSHV_ORF4_at         | ---               | ---                             | -0.117 | -2.40 | 0.0184 | 1.00 |
| merck2-BU174390_a_at        | SCD               | NM_005063                       | -0.140 | -2.40 | 0.0184 | 1.00 |
| merck-ENST00000254908_s_at  | PCBD2             | NM_032151                       | -0.161 | -2.40 | 0.0184 | 1.00 |
| merck-AK127697_at           | ---               | AK127697                        | 0.353  | 2.40  | 0.0184 | 1.00 |
| merck-NM_182980_at          | OSGIN1            | NM_013370 NM_182980 NM_182981   | -0.160 | -2.40 | 0.0184 | 1.00 |
| merck-A1863735_at           | ---               | AY534685                        | -0.158 | -2.40 | 0.0184 | 1.00 |
| merck-NM_001017418_s_at     | SPRR2B            | NM_001017418                    | 0.0899 | 2.40  | 0.0184 | 1.00 |
| merck2-NM_178125_at         | TRIM50            | NM_178125                       | -0.133 | -2.40 | 0.0184 | 1.00 |
| merck-NM_004701_at          | CNGB2             | NM_004701                       | -0.312 | -2.40 | 0.0185 | 1.00 |
| merck-AK055765_at           | ODZ1              | NM_001163278 NM_001163279 NM_01 | 0.182  | 2.40  | 0.0185 | 1.00 |
| merck-NM_001033081_s_at     | MYCL1             | NM_001033081 NM_001033082       | -0.182 | -2.40 | 0.0186 | 1.00 |
| merck-AK057810_at           | ---               | AK057810                        | -0.165 | -2.40 | 0.0186 | 1.00 |
| merck2-BP431382_at          | MPO               | NM_000250                       | -0.441 | -2.40 | 0.0186 | 1.00 |
| merck-NM_003446_at          | ---               | ---                             | 0.198  | 2.39  | 0.0186 | 1.00 |
| merck-VZV_OKA_ORF9_s_at     | ---               | ---                             | -0.133 | -2.39 | 0.0186 | 1.00 |
| merck-AK024877_at           | ---               | AK024877                        | -0.229 | -2.39 | 0.0186 | 1.00 |
| merck2-BX641171_at          | ---               | BX641171                        | 0.344  | 2.39  | 0.0187 | 1.00 |
| merck2-B1199293_a_at        | KIAA0226          | NM_001145642 NM_014687          | -0.123 | -2.39 | 0.0187 | 1.00 |
| merck2-AK225719_at          | MAP2K6            | AK225719                        | -0.157 | -2.39 | 0.0188 | 1.00 |
| merck-NM_008069_a_at        | SLC46A1           | NM_080689                       | -0.155 | -2.39 | 0.0188 | 1.00 |
| merck-NC_001357_ORF_1185_at | ---               | ---                             | -0.104 | -2.39 | 0.0188 | 1.00 |
| merck-NM_001040034_at       | CD63              | NM_001780 NM_001040034          | -0.113 | -2.39 | 0.0188 | 1.00 |
| merck-NM_174902_a_at        | LDLRAD3           | NM_174902                       | -0.147 | -2.39 | 0.0189 | 1.00 |
| merck-NM_133478_a_at        | SLC4A5            | NM_021196 NM_133478             | 0.156  | 2.39  | 0.0189 | 1.00 |
| merck2-BC005395_at          | HPX               | NM_000613                       | -0.147 | -2.39 | 0.0190 | 1.00 |
| merck-AL833666_at           | ---               | AL833666                        | -0.296 | 2.39  | 0.0190 | 1.00 |
| merck-XM_939116_a_at        | CXorf48           | NM_001031705 NM_017863          | 0.336  | 2.39  | 0.0191 | 1.00 |
| merck-XM_944971_at          | ---               | AC068642                        | -0.127 | -2.38 | 0.0192 | 1.00 |
| merck2-D26070_at            | ITPR1             | NM_001099952 NM_002222 NM_00116 | 0.178  | 2.38  | 0.0192 | 1.00 |
| merck-AK095619_s_at         | ---               | ---                             | -0.262 | -2.38 | 0.0192 | 1.00 |
| merck2-BG035799_at          | CAD               | NM_004341                       | -0.168 | -2.38 | 0.0192 | 1.00 |
| merck-AK098043_s_at         | ---               | AK098043                        | -0.204 | 2.38  | 0.0192 | 1.00 |
| merck2-AK091896_at          | MFSD4             | NM_181644                       | 0.168  | 2.38  | 0.0192 | 1.00 |
| merck2-NM_174901_at         | FAM9C             | NM_174901                       | 0.312  | 2.38  | 0.0193 | 1.00 |
| merck-NM_006227_at          | PLTP              | NM_006227 NM_182676             | -0.203 | -2.38 | 0.0193 | 1.00 |
| merck-AF085376_at           | ---               | AF085376                        | 0.188  | 2.38  | 0.0193 | 1.00 |
| merck2-BC072452_a_at        | FAM107B           | NM_031453                       | 0.176  | 2.38  | 0.0193 | 1.00 |
| merck-AV655754_at           | ---               | DQ314888                        | -0.172 | -2.38 | 0.0194 | 1.00 |
| merck-NM_017856_at          | GEMIN8            | NM_001042480 NM_001042479 NM_01 | 0.202  | 2.38  | 0.0194 | 1.00 |
| merck-NM_181780_at          | BTLA              | NM_181780 NM_001085357          | 0.266  | 2.38  | 0.0194 | 1.00 |
| merck-NM_001468_at          | GAGE1             | NM_001468 NM_001040663          | 0.215  | 2.38  | 0.0194 | 1.00 |
| merck-BM973820_s_at         | ODF38             | NM_001014440                    | -0.245 | -2.38 | 0.0194 | 1.00 |
| merck-NM_001040686_at       | OR2L2             | NM_001040686                    | 0.123  | 2.38  | 0.0194 | 1.00 |
| merck-DB317658_at           | ---               | ---                             | 0.398  | 2.38  | 0.0194 | 1.00 |
| merck-BX422512_a_at         | BRD7              | NM_001173984 NM_013263          | -0.168 | -2.38 | 0.0195 | 1.00 |
| merck2-CU013091_s_at        | ---               | ---                             | -0.297 | -2.38 | 0.0196 | 1.00 |
| merck2-U69611_at            | ADAM17            | NM_003183                       | -0.207 | -2.38 | 0.0196 | 1.00 |
| merck-BQ325657_at           | ---               | AF017104                        | -0.209 | -2.37 | 0.0196 | 1.00 |
| merck-XM_939413_x_at        | ---               | AL049641                        | 0.600  | 2.37  | 0.0196 | 1.00 |
| merck2-BE855602_at          | OR2A9P            | NR_002157                       | 0.294  | 2.37  | 0.0197 | 1.00 |
| merck-NM_017848_a_at        | FAM120C           | NM_017848                       | 0.217  | 2.37  | 0.0197 | 1.00 |
| merck-A1345952_at           | ---               | ---                             | 0.208  | 2.37  | 0.0197 | 1.00 |
| merck-AK092710_a_at         | EPT1              | NM_033505                       | 0.169  | 2.37  | 0.0198 | 1.00 |
| merck-BC005368_s_at         | MMP19             | NM_002429                       | -0.176 | -2.37 | 0.0198 | 1.00 |
| merck-ENST000003034139_at   | ---               | NC_005176                       | -0.149 | -2.37 | 0.0198 | 1.00 |
| merck2-A1263400_at          | SPTBN1            | NM_178313                       | 0.138  | 2.37  | 0.0199 | 1.00 |
| merck-NM_052873_at          | IFT43             | NM_052873                       | 0.155  | 2.37  | 0.0199 | 1.00 |
| merck-BC028005_at           | GRASPOS           | BC028005                        | -0.179 | -2.37 | 0.0199 | 1.00 |
| merck-AF06096_x_at          | FAM102A           | AL049365                        | 0.170  | 2.37  | 0.0199 | 1.00 |
| merck-NM_069912_at          | ---               | AC005482                        | -0.116 | -2.37 | 0.0199 | 1.00 |
| merck-BG755321_x_at         | HLA-DRB1 HLA-DRB3 | NM_002124 NM_022555 XM_00312051 | 0.414  | 2.37  | 0.0199 | 1.00 |
| merck2-NM_152547_at         | BTNL9             | NM_152547                       | 0.243  | 2.37  | 0.0199 | 1.00 |
| merck-XM_928469_s_at        | ---               | AC006476                        | -0.162 | -2.37 | 0.0199 | 1.00 |
| merck-NM_181802_at          | UBE2C             | NM_007019 NM_181799 NM_181800 N | -0.249 | -2.37 | 0.0199 | 1.00 |
| merck-NM_032838_s_at        | ZNF566            | NM_001145345 NM_001145344 NM_03 | 0.214  | 2.37  | 0.0200 | 1.00 |
| merck-NM_940379_at          | ---               | ---                             | -0.161 | -2.37 | 0.0200 | 1.00 |
| merck-NM_001783_at          | CD79A             | NM_001783 NM_021601             | 0.380  | 2.37  | 0.0200 | 1.00 |
| merck-ENST00000303288_a_at  | CXorf69           | NM_001163438                    | 0.513  | 2.37  | 0.0200 | 1.00 |
| merck2-BX647088_at          | SRRM2             | NM_016333                       | -0.250 | -2.37 | 0.0201 | 1.00 |
| merck-U16861_a_at           | KCNJ2             | NM_000891                       | -0.271 | -2.37 | 0.0201 | 1.00 |
| merck-ENST00000381635_at    | ---               | ---                             | -0.281 | -2.36 | 0.0202 | 1.00 |
| merck2-A1342696_at          | ---               | AL109811                        | -0.171 | -2.36 | 0.0203 | 1.00 |
| merck-BG028539_at           | ---               | ---                             | -0.143 | -2.36 | 0.0203 | 1.00 |
| merck-NM_007125_at          | UTY               | NM_007125                       | -1.09  | -2.36 | 0.0203 | 1.00 |
| merck-ENST00000296564_at    | KIAA0947          | NM_015325                       | 0.152  | 2.36  | 0.0203 | 1.00 |
| merck2-AF262405_at          | CASK              | NM_003688 NM_001126054 NM_00112 | 0.235  | 2.36  | 0.0204 | 1.00 |
| merck-BC071813_s_at         | FLJ48906          | NR_033896                       | -0.209 | -2.36 | 0.0204 | 1.00 |
| merck-CB851948_a_at         | WDR52             | NM_001164496 NM_018338          | 0.219  | 2.36  | 0.0204 | 1.00 |
| merck2-BT019764_at          | LDPH              | NM_002300 NM_001174097          | 0.145  | 2.36  | 0.0204 | 1.00 |
| merck-NM_014265_at          | ADAM28            | NM_014265                       | 0.383  | 2.36  | 0.0204 | 1.00 |
| merck-NM_014694_at          | ADAMTSL2          | NM_014694 NM_001145320          | -0.187 | -2.36 | 0.0205 | 1.00 |
| merck2-DB444113_at          | ---               | ---                             | -0.151 | -2.36 | 0.0205 | 1.00 |
| merck-NM_012415_at          | RAD54B            | NM_012415                       | 0.279  | 2.36  | 0.0205 | 1.00 |
| merck2-AB208968_at          | CDCA2BPA          | NM_014826 NM_003607             | -0.137 | -2.36 | 0.0205 | 1.00 |
| merck2-VZV_OKA_ORF8_at      | ---               | NC_001348                       | -0.113 | -2.36 | 0.0205 | 1.00 |
| merck2-AL515981_at          | NCLN              | NM_020170                       | -0.200 | -2.36 | 0.0205 | 1.00 |
| merck-HCT13097_2_at         | ---               | NG_010976                       | -0.138 | -2.36 | 0.0206 | 1.00 |
| merck2-BX112120_at          | USP51             | NM_201286                       | 0.180  | 2.36  | 0.0206 | 1.00 |
| merck-NM_001039725_a_at     | PNPLA1            | NM_173676 NM_001145716 NM_00114 | -0.184 | -2.36 | 0.0206 | 1.00 |
| merck-NM_205849_s_at        | FAM9B             | NM_205849                       | 0.384  | 2.36  | 0.0206 | 1.00 |
| merck-NM_080817_at          | GPR82             | NM_080817                       | 0.218  | 2.35  | 0.0206 | 1.00 |
| merck2-R50740_at            | ---               | ---                             | 0.109  | 2.35  | 0.0207 | 1.00 |
| merck2-NM_012307_at         | EPB41L3           | NM_012307                       | -0.168 | -2.35 | 0.0207 | 1.00 |
| merck-NM_173695_at          | CXorf59           | NM_173695                       | 0.341  | 2.35  | 0.0207 | 1.00 |
| merck-NM_022351_at          | NECAB1            | NM_022351                       | -0.188 | -2.35 | 0.0207 | 1.00 |
| merck-DR001276_at           | ---               | ---                             | -0.391 | -2.35 | 0.0207 | 1.00 |
| merck2-NM_004504_at         | AGFG1             | NM_001135187 NM_004504 NM_00113 | -0.182 | -2.35 | 0.0207 | 1.00 |
| merck2-VZV_OKA_O17_up_s_at  | ---               | ---                             | 0.111  | 2.35  | 0.0207 | 1.00 |
| merck2-CB529222_at          | ---               | CR603455                        | 0.256  | 2.35  | 0.0207 | 1.00 |
| merck-BX104821_at           | ---               | ---                             | -0.125 | -2.35 | 0.0207 | 1.00 |
| merck-NM_001040075_s_at     | ---               | ---                             | 0.325  | 2.35  | 0.0207 | 1.00 |
| merck-ENST00000317577_s_at  | PPAPDC1B          | NM_001102559                    | 0.368  | 2.35  | 0.0208 | 1.00 |
| merck2-AK058103_at          | ADRBK2            | NM_005160                       | -0.199 | -2.35 | 0.0208 | 1.00 |
| merck-NM_032317_at          | DNAJC30           | NM_032317                       | 0.242  | 2.35  | 0.0209 | 1.00 |
| merck2-AA262548_at          | PAWR              | NM_002583                       | 0.240  | 2.35  | 0.0209 | 1.00 |
| merck-NM_012113_at          | CA14              | NM_012113                       | -0.115 | -2.35 | 0.0209 | 1.00 |
| merck-NM_078483_at          | SLC36A1           | NM_078483                       | -0.248 | -2.35 | 0.0210 | 1.00 |
| merck-BC092468_a_at         | TTG3              | NM_003316 NM_001001894          | 0.126  | 2.35  | 0.0210 | 1.00 |
| merck-XM_371781_x_at        | ---               | ---                             | 0.0683 | 2.35  | 0.0210 | 1.00 |
| merck2-NM_182827_at         | FKBP9 FKBP9L      | NM_007270 NR_027339 NR_027340 N | -0.213 | -2.35 | 0.0210 | 1.00 |
| merck-NM_145284_at          | FAM122B           | NM_145284 NM_001166599 NM_00116 | 0.252  | 2.35  | 0.0211 | 1.00 |
| merck2-BM019836_at          | LEF1              | NM_016269 NM_001130713 NM_00113 | 0.158  | 2.35  | 0.0211 | 1.00 |
| merck-XM_065755_at          | ---               | ---                             | -0.117 | -2.35 | 0.0211 | 1.00 |
| merck2-CN343947_at          | ZNF711            | NM_027198                       | 0.284  | 2.35  | 0.0211 | 1.00 |
| merck-NM_024330_at          | SLC27A3           | NM_024330                       | -0.213 | -2.35 | 0.0211 | 1.00 |
| merck2-NM_138389_at         | FAM114A1          | NM_138389 NR_033290             | -0.141 | -2.35 | 0.0211 | 1.00 |
| merck-NM_173463_at          | CCDC149           | ALB34257                        | -0.162 | -2.35 | 0.0212 | 1.00 |
| merck-NM_004397_at          | DDX6              | NM_004397                       | -0.191 | -2.34 | 0.0212 | 1.00 |
| merck2-DQ892007_s_at        | ---               | ---                             | 0.314  | 2.34  | 0.0212 | 1.00 |
| merck-NM_012108_at          | STAP1             | NM_012108                       | 0.375  | 2.34  | 0.0212 | 1.00 |
| merck-DA736753_a_at         | PRRC2C            | NM_015172                       | -0.260 | -2.34 | 0.0213 | 1.00 |
| merck-XM_928495_at          | ---               | CR610555                        | -0.101 | -2.34 | 0.0213 | 1.00 |
| merck-NM_001004342_at       | TRIM67            | NM_001004342                    | 0.156  | 2.34  | 0.0213 | 1.00 |
| merck-R07431_s_at           | ---               | ---                             | -0.231 | -2.34 | 0.0214 | 1.00 |
| merck2-CF121504_a_at        | Cborf86           | NM_024718 NM_001173988 NM_00117 | -0.186 | -2.34 | 0.0214 | 1.00 |
| merck-AK024080_a_at         | TOP2A             | NM_0010167                      | -0.251 | -2.34 | 0.0214 | 1.00 |
| merck-NM_003813_at          | ADAM21            | NM_003813                       | 0.240  | 2.34  | 0.0214 | 1.00 |

|                             |              |                                 |         |       |        |      |
|-----------------------------|--------------|---------------------------------|---------|-------|--------|------|
| merck-hCT1970811_at         | ---          | AC114284                        | -0.122  | -2.34 | 0.0214 | 1.00 |
| merck-NM_005859_at          | PURA         | NM_005859                       | 0.178   | 2.34  | 0.0214 | 1.00 |
| merck-BC035519_s_at         | ---          | AL049423                        | 0.117   | 2.34  | 0.0214 | 1.00 |
| merck2-AK056270_at          | STBSIA5      | NM_013305                       | -0.146  | -2.34 | 0.0214 | 1.00 |
| merck-NM_033101_s_at        | LGALS12      | NM_001142535 NM_033101 NM_00114 | -0.303  | -2.34 | 0.0215 | 1.00 |
| merck2-H12280_at            | ---          | NG_005636                       | 0.208   | 2.34  | 0.0215 | 1.00 |
| merck2-AA778845_at          | ---          | ---                             | -0.144  | -2.34 | 0.0215 | 1.00 |
| merck-NM_018139_x_at        | CHCHD2       | NM_018139                       | -0.102  | -2.34 | 0.0215 | 1.00 |
| merck-NM_012225_at          | NUBP2        | NM_012225                       | -0.167  | -2.34 | 0.0216 | 1.00 |
| merck-U23849_s_at           | APP          | NM_000484 NM_001204303 NM_20141 | -0.157  | 2.34  | 0.0216 | 1.00 |
| merck-AK094945_at           | LOC285500    | AK094945                        | 0.146   | 2.34  | 0.0216 | 1.00 |
| merck2-DT217746_at          | ASRGL1       | NM_001083926 NM_025080          | -0.233  | -2.34 | 0.0216 | 1.00 |
| merck-NM_000950_at          | PRRG1        | NM_000950 NM_001142395 NM_00117 | 0.326   | 2.34  | 0.0216 | 1.00 |
| merck2-ENS100000390537_s_at | ---          | ---                             | 0.145   | 2.34  | 0.0216 | 1.00 |
| merck2-U72763_at            | TNFRSF25     | NM_148965 NM_003790 NM_14896 N  | 0.176   | 2.34  | 0.0217 | 1.00 |
| merck2-ENS100000379900_x_at | ---          | ---                             | 0.395   | 2.34  | 0.0217 | 1.00 |
| merck2-NM_012412_at         | H2AFV        | NM_012412 NM_201436 NM_201516 N | -0.123  | -2.34 | 0.0217 | 1.00 |
| merck-NM_002731_at          | PRKACB       | NM_182948 NM_002731             | 0.201   | 2.34  | 0.0217 | 1.00 |
| merck2-BU175285_at          | PTGES3       | NM_006601                       | 0.202   | 2.34  | 0.0217 | 1.00 |
| merck2-AA514227_at          | ---          | CR616033                        | -0.159  | -2.34 | 0.0217 | 1.00 |
| merck2-BG115561_at          | ZFX          | NM_175039                       | -0.141  | -2.33 | 0.0217 | 1.00 |
| merck-ENS100000377163_at    | ST6GALNAC4   | AF399496                        | -0.128  | -2.33 | 0.0217 | 1.00 |
| merck2-NM_000254_a_at       | MTR          | NM_000254                       | 0.130   | 2.33  | 0.0218 | 1.00 |
| merck-AL137603_at           | ZFY          | NM_003411 NM_001145275 NM_00114 | -0.678  | -2.33 | 0.0218 | 1.00 |
| merck-ENS100000327506_at    | HEATR7B1     | XM_001721240 XM_291007 XM_93970 | 0.124   | 2.33  | 0.0218 | 1.00 |
| merck-NM_005262_at          | GFER         | NM_005262                       | -0.167  | -2.33 | 0.0218 | 1.00 |
| merck-NM_019020_s_at        | TBC1D16      | NM_019020                       | -0.140  | -2.33 | 0.0219 | 1.00 |
| merck2-BQ025373_at          | YWHAQ        | NM_008626                       | 0.157   | 2.33  | 0.0219 | 1.00 |
| merck-NM_052902_at          | STK11P       | NM_052902                       | -0.217  | -2.33 | 0.0219 | 1.00 |
| merck-NM_001832_at          | CLPS         | NM_001832                       | -0.114  | -2.33 | 0.0219 | 1.00 |
| merck-AK128185_at           | LOC399715    | AK128185                        | -0.194  | -2.33 | 0.0220 | 1.00 |
| merck2-ENS100000380631_a_at | SH3BGR       | NM_007341 NM_001001713          | 0.173   | 2.33  | 0.0220 | 1.00 |
| merck2-X59739_at            | ---          | NM_003410 NM_001178094 NM_00117 | 0.249   | 2.33  | 0.0220 | 1.00 |
| merck-NM_019903_at          | ADD3         | NM_016824 NM_019903 NM_001121   | 0.218   | 2.33  | 0.0221 | 1.00 |
| merck2-AK123210_at          | LOC100505759 | XR_110332 XR_111324 XR_114603   | 0.207   | 2.33  | 0.0221 | 1.00 |
| merck2-NM_198480_at         | ZNF615       | NM_001199324 NM_198480          | 0.166   | 2.33  | 0.0222 | 1.00 |
| merck-XM_936762_at          | ---          | NG_021571                       | -0.133  | -2.33 | 0.0222 | 1.00 |
| merck-BX089627_at           | ---          | ---                             | 0.230   | 2.33  | 0.0222 | 1.00 |
| merck-AL080280_s_at         | ---          | AL080281                        | -0.239  | -2.32 | 0.0223 | 1.00 |
| merck-AK022479_at           | ---          | AK022479                        | 0.216   | 2.32  | 0.0223 | 1.00 |
| merck-CR608093_s_at         | YWHAE        | NM_006761 NR_024058             | -0.0586 | -2.32 | 0.0223 | 1.00 |
| merck-NM_002463_at          | MX2          | NM_002463                       | -0.171  | -2.32 | 0.0223 | 1.00 |
| merck-NM_003400_at          | XP01         | NM_003400                       | 0.181   | 2.32  | 0.0223 | 1.00 |
| merck-NM_001042370_at       | TROVE2       | NM_004600 NM_001173524 NR_03339 | -0.128  | -2.32 | 0.0223 | 1.00 |
| merck-ENS100000380578_at    | LOC100505759 | XR_109033 XR_111134 XR_114445   | -0.114  | -2.32 | 0.0223 | 1.00 |
| merck2-AL136588_at          | AGPAT5       | NM_018361                       | 0.211   | 2.32  | 0.0224 | 1.00 |
| merck-AK023967_at           | ---          | AK023967                        | -0.216  | -2.32 | 0.0224 | 1.00 |
| merck-BX100544_at           | ---          | AC090068                        | 0.206   | 2.32  | 0.0224 | 1.00 |
| merck2-NM_144702_at         | LRRCC71      | NM_144702                       | -0.152  | -2.32 | 0.0225 | 1.00 |
| merck2-NM_0019655_at        | SNX22        | NM_024798                       | 0.302   | 2.32  | 0.0225 | 1.00 |
| merck-BG1917227_at          | ---          | NG_008727                       | -0.146  | -2.32 | 0.0225 | 1.00 |
| merck-ENS100000298211_at    | ---          | NG_022167                       | -0.209  | -2.32 | 0.0225 | 1.00 |
| merck-NM_032566_at          | SPINK7       | NM_032566                       | -0.119  | -2.32 | 0.0225 | 1.00 |
| merck-AA897420_at           | ---          | ---                             | -0.187  | -2.32 | 0.0226 | 1.00 |
| merck2-BX385129_at          | LARGE        | NM_004737 NM_133642             | 0.144   | 2.32  | 0.0226 | 1.00 |
| merck2-NM_145060_a_at       | SKA1         | NM_001039535 NM_145060          | -0.154  | -2.32 | 0.0227 | 1.00 |
| merck2-BG503223_at          | ---          | ---                             | -0.0972 | -2.32 | 0.0227 | 1.00 |
| merck-R02328_s_at           | ---          | ---                             | 0.315   | 2.32  | 0.0227 | 1.00 |
| merck2-NM_001080851_s_at    | ---          | ---                             | 0.214   | 2.32  | 0.0227 | 1.00 |
| merck2-AL548534_a_at        | C19orf12     | NM_001031726 NM_031448          | 0.144   | 2.32  | 0.0227 | 1.00 |
| merck-AW977000_at           | ---          | NG_012834                       | 0.354   | 2.32  | 0.0227 | 1.00 |
| merck-NM_001716_at          | CXCR5        | NM_001716 NM_032966             | 0.338   | 2.32  | 0.0227 | 1.00 |
| merck2-BG695979_at          | ---          | AL034562                        | 0.221   | 2.32  | 0.0227 | 1.00 |
| merck-NM_005532_at          | IFIT2        | NM_001130080 NM_005532          | -0.780  | -2.32 | 0.0227 | 1.00 |
| merck-CR608275_at           | CBLL1        | NM_024814 NR_024199             | 0.175   | 2.32  | 0.0227 | 1.00 |
| merck-BC029962_s_at         | SYT5         | NM_003180                       | -0.131  | -2.32 | 0.0228 | 1.00 |
| merck-ENS100000339047_at    | KIAA0825     | NM_001145678                    | -0.261  | -2.32 | 0.0228 | 1.00 |
| merck2-DA947637_at          | MED29        | NM_017592                       | -0.203  | -2.32 | 0.0228 | 1.00 |
| merck2-M02449_a_at          | NAAA         | NM_014435 NM_001042402          | -0.208  | -2.32 | 0.0228 | 1.00 |
| merck-AI282569_at           | ---          | AP000274                        | 0.200   | 2.32  | 0.0228 | 1.00 |
| merck-NM_001009925_a_at     | C20orf30     | NM_001009923 NM_001009924 NM_01 | 0.124   | 2.31  | 0.0228 | 1.00 |
| merck-AA243882_at           | ---          | AC006375                        | -0.238  | -2.31 | 0.0229 | 1.00 |
| merck2-BM541598_at          | PHLDA1       | NM_007350                       | 0.160   | 2.31  | 0.0229 | 1.00 |
| merck2-NM_021871_at         | FOXA         | NM_021871                       | 0.130   | 2.31  | 0.0229 | 1.00 |
| merck2-NM_001004196_at      | CD200        | NM_005944 NM_001004196          | 0.417   | 2.31  | 0.0229 | 1.00 |
| merck-NM_019045_at          | WDR44        | NM_019045 NM_001184965 NM_00118 | 0.169   | 2.31  | 0.0229 | 1.00 |
| merck-NM_019106_at          | SEPT3        | NM_145733 NM_019106             | -0.139  | -2.31 | 0.0230 | 1.00 |
| merck-AK021556_at           | ---          | AK021556                        | 0.173   | 2.31  | 0.0230 | 1.00 |
| merck2-AF000992_a_at        | KDM6A        | NM_021140                       | 0.299   | 2.31  | 0.0230 | 1.00 |
| merck-NM_932757_at          | ---          | ---                             | -0.143  | -2.31 | 0.0230 | 1.00 |
| merck-NM_012290_at          | TLK1         | NM_012290 NM_001136554 NM_00113 | 0.182   | 2.31  | 0.0230 | 1.00 |
| merck-NM_01002275_at        | FCGR2B       | NM_004001 NM_001002273 NM_00101 | 0.289   | 2.31  | 0.0230 | 1.00 |
| merck-NM_012069_at          | ATP1B4       | NM_001142447 NM_012069          | 0.339   | 2.31  | 0.0230 | 1.00 |
| merck-NM_014294_at          | TRAM1        | NM_014294                       | 0.172   | 2.31  | 0.0231 | 1.00 |
| merck-NM_021643_at          | TRIB2        | NM_021643 NR_027303             | 0.165   | 2.31  | 0.0231 | 1.00 |
| merck2-AL049423_at          | ---          | AL049423                        | 0.136   | 2.31  | 0.0231 | 1.00 |
| merck-BC001459_s_at         | RAD51        | NM_002875 NM_133487 NM_00116427 | -0.162  | -2.31 | 0.0232 | 1.00 |
| merck-NM_003943_at          | STBD1        | NM_003943                       | -0.190  | -2.31 | 0.0232 | 1.00 |
| merck2-CMV_UL89_at          | ---          | ---                             | -0.103  | -2.31 | 0.0232 | 1.00 |
| merck-NM_001040070_x_at     | ---          | ---                             | 0.346   | 2.31  | 0.0232 | 1.00 |
| merck-BX647350_at           | ITGA9        | BX647350                        | -0.265  | -2.31 | 0.0232 | 1.00 |
| merck-AF019617_at           | PARR         | NR_022010                       | -0.158  | -2.31 | 0.0233 | 1.00 |
| merck2-AB006651_at          | MED14        | AF304448                        | 0.188   | 2.31  | 0.0233 | 1.00 |
| merck2-BC064028_at          | ---          | ---                             | -0.132  | -2.31 | 0.0233 | 1.00 |
| merck2-NM_199440_s_at       | HSPD1        | NM_002156 NM_199440             | 0.104   | 2.31  | 0.0233 | 1.00 |
| merck2-NM_020406_at         | CD177        | NM_020406                       | -0.367  | -2.31 | 0.0233 | 1.00 |
| merck-NM_174937_at          | TCERG1L      | NM_174937                       | -0.117  | -2.31 | 0.0233 | 1.00 |
| merck-AW104394_at           | ---          | AL359390                        | 0.196   | 2.31  | 0.0234 | 1.00 |
| merck-BC050658_a_at         | ZC3H13       | NM_015070                       | -0.164  | -2.31 | 0.0234 | 1.00 |
| merck-NM_174939_s_at        | LINC00301    | NR_026946                       | -0.140  | -2.30 | 0.0234 | 1.00 |
| merck-NM_018075_s_at        | ANO10        | NM_018075                       | -0.168  | -2.30 | 0.0234 | 1.00 |
| merck2-DB293898_a_at        | BAZ2A        | NM_013449                       | -0.292  | -2.30 | 0.0235 | 1.00 |
| merck-NM_138799_at          | MBOAT2       | NM_138799                       | -0.190  | -2.30 | 0.0235 | 1.00 |
| merck-NM_139266_at          | STAT1        | NM_139266                       | -0.246  | -2.30 | 0.0235 | 1.00 |
| merck-AK127055_a_at         | ZBTB47       | NM_145166                       | -0.222  | -2.30 | 0.0235 | 1.00 |
| merck-BC089428_a_at         | PLEKHG1      | NM_001029884                    | 0.170   | 2.30  | 0.0236 | 1.00 |
| merck-NM_080753_at          | WFDC10A      | NM_080753                       | 0.139   | 2.30  | 0.0238 | 1.00 |
| merck-NM_020726_a_at        | NLN          | NM_020726                       | -0.196  | -2.30 | 0.0238 | 1.00 |
| merck2-HSV1_ORF_UL50_at     | ---          | ---                             | -0.120  | -2.30 | 0.0238 | 1.00 |
| merck2-BG166466_at          | PPR8C        | NM_001123355 NM_002721 NM_00112 | 0.114   | 2.30  | 0.0239 | 1.00 |
| merck-NM_000487_at          | ARSA         | NM_000487 NM_001085425 NM_00108 | -0.227  | -2.30 | 0.0239 | 1.00 |
| merck2-NM_172236_at         | POFUT1       | NM_172236                       | 0.124   | 2.30  | 0.0239 | 1.00 |
| merck-NM_001005182_at       | OR6C1        | NM_001005182                    | -0.127  | -2.30 | 0.0239 | 1.00 |
| merck2-BG680395_at          | ---          | ---                             | 0.114   | 2.30  | 0.0239 | 1.00 |
| merck-NM_021047_s_at        | ZNF253       | NM_021047                       | 0.246   | 2.30  | 0.0239 | 1.00 |
| merck-NM_138346_s_at        | KIAA2013     | NM_138346                       | -0.137  | -2.30 | 0.0239 | 1.00 |
| merck-AL080200_at           | C8orf71      | NR_026772                       | -0.150  | -2.30 | 0.0240 | 1.00 |
| merck-BC041884_at           | RFTN1        | BC041884                        | -0.196  | -2.30 | 0.0240 | 1.00 |
| merck2-BM679668_at          | ---          | ---                             | 0.225   | 2.30  | 0.0240 | 1.00 |
| merck-NM_003495_at          | HIST1H4I     | NM_003495                       | -0.135  | -2.29 | 0.0240 | 1.00 |
| merck-CR613437_at           | ---          | CR613437                        | 0.225   | 2.29  | 0.0240 | 1.00 |
| merck-BC037904_at           | MGCA4257     | BC037904                        | -0.118  | -2.29 | 0.0240 | 1.00 |
| merck-AK098296_at           | ---          | XR_109469 XR_111770 XR_115168   | 0.184   | 2.29  | 0.0241 | 1.00 |
| merck-NM_178865_at          | SERINC2      | NM_178865 NM_018565 NM_00119903 | -0.188  | -2.29 | 0.0241 | 1.00 |
| merck-ENS100000341231_at    | ---          | AF399360                        | -0.173  | -2.29 | 0.0242 | 1.00 |
| merck-NM_153234_at          | LIX1         | NM_153234                       | 0.253   | 2.29  | 0.0242 | 1.00 |
| merck-NM_001346_at          | DKGK         | NM_001346 NM_001080744 NM_00108 | -0.233  | -2.29 | 0.0242 | 1.00 |
| merck2-BX647250_at          | ---          | BX647250                        | -0.180  | -2.29 | 0.0242 | 1.00 |
| merck2-BI461234_s_at        | APLP2        | NM_001642 NM_001142276 NM_00114 | -0.270  | -2.29 | 0.0242 | 1.00 |

|                             |                              |                                  |         |       |        |      |
|-----------------------------|------------------------------|----------------------------------|---------|-------|--------|------|
| merck-NM_015441_at          | OLFML2B                      | NM_015441                        | -0.161  | -2.29 | 0.0242 | 1.00 |
| merck-NM_174907_a_at        | PP4R21                       | NM_174907                        | -0.179  | -2.29 | 0.0243 | 1.00 |
| merck2-NM_001060538_x_at    | AKR1B15                      | NM_001060538                     | -0.138  | -2.29 | 0.0243 | 1.00 |
| merck-AK027161_at           | ---                          | AK027161                         | 0.162   | 2.29  | 0.0243 | 1.00 |
| merck-BC010705_at           | ZNF519                       | NM_145287                        | 0.213   | 2.29  | 0.0243 | 1.00 |
| merck-BC051743_a_at         | ZFP91 ZFP91-CNTF             | NM_053023 NM_001197051 NR_02409  | -0.196  | -2.29 | 0.0243 | 1.00 |
| merck-AA399109_at           | ---                          | NG_013090                        | 0.241   | 2.29  | 0.0243 | 1.00 |
| merck-DB327110_at           | ---                          | AL121957                         | -0.0981 | -2.29 | 0.0243 | 1.00 |
| merck2-HSV1_ORF_UL22_at     | ---                          | ---                              | -0.120  | -2.29 | 0.0243 | 1.00 |
| merck-BC042959_at           | ---                          | XR_109831 XR_112669 XR_113670 XR | -0.122  | -2.29 | 0.0244 | 1.00 |
| merck2-AK092450_s_at        | ---                          | AK092450                         | 0.146   | 2.29  | 0.0244 | 1.00 |
| merck-NM_001007249_at       | OR8G2                        | NM_001007249                     | -0.0947 | -2.29 | 0.0244 | 1.00 |
| merck2-AL080179_at          | FAM75C1 FAM75C2              | NM_001145124 NM_001166137        | -0.253  | -2.29 | 0.0244 | 1.00 |
| merck-BG482638_at           | ---                          | ---                              | -0.0965 | -2.29 | 0.0244 | 1.00 |
| merck-NM_023034_at          | WH5C1L1                      | NM_023034                        | -0.111  | -2.29 | 0.0244 | 1.00 |
| merck2-BC009851_at          | IGHM                         | BC009851                         | 0.356   | 2.29  | 0.0244 | 1.00 |
| merck-NM_198337_at          | INSIG1                       | NM_005542 NM_198336 NM_198337    | 0.146   | 2.29  | 0.0245 | 1.00 |
| merck-HCT1822680_at         | ---                          | AC211782                         | -0.124  | -2.29 | 0.0245 | 1.00 |
| merck-NM_198576_s_at        | AGRN                         | NM_198576                        | -0.277  | -2.29 | 0.0245 | 1.00 |
| merck2-DA833911_at          | ---                          | ---                              | -0.226  | -2.29 | 0.0245 | 1.00 |
| merck-AK024684_at           | ---                          | AK024684                         | 0.180   | 2.29  | 0.0245 | 1.00 |
| merck-BX094453_a_at         | LOC283143                    | NR_034148                        | -0.133  | -2.29 | 0.0245 | 1.00 |
| merck2-ENST00000331944_s_at | ---                          | ---                              | -0.165  | -2.29 | 0.0246 | 1.00 |
| merck-BM806633_at           | ---                          | ---                              | -0.104  | -2.28 | 0.0247 | 1.00 |
| merck-NM_022368_at          | PJA1                         | NM_145119 NM_001032396 NM_02236  | 0.154   | 2.28  | 0.0247 | 1.00 |
| merck2-DQ535269_x_at        | ---                          | DO535269                         | -0.162  | -2.28 | 0.0247 | 1.00 |
| merck-CB110908_x_at         | MT2A                         | NM_005953                        | -0.263  | -2.28 | 0.0247 | 1.00 |
| merck2-BE144260_at          | ---                          | AY844470                         | -0.131  | -2.28 | 0.0247 | 1.00 |
| merck-NM_002417_at          | MKI67                        | NM_002417 NM_001145966           | -0.197  | -2.28 | 0.0247 | 1.00 |
| merck-NM_015589_s_at        | SAMD4A                       | NM_015589 NM_001161576 NM_00116  | -0.209  | -2.28 | 0.0248 | 1.00 |
| merck-NM_001006121_s_at     | RBMY1A1 RBMY1B RBMY1D RBMY1E | NM_005058 NM_001006121 NM_00100  | -0.129  | -2.28 | 0.0248 | 1.00 |
| merck2-AA020356_at          | CLN8                         | NM_018941                        | 0.128   | 2.28  | 0.0248 | 1.00 |
| merck-NM_003559_a_at        | PP4K2B                       | NM_003559                        | -0.161  | -2.28 | 0.0248 | 1.00 |
| merck2-DQ893675_x_at        | RIN1                         | NM_004292                        | -0.190  | -2.28 | 0.0248 | 1.00 |
| merck-NM_022375_at          | OCLM                         | NM_022375 NM_001199906           | -0.182  | -2.28 | 0.0248 | 1.00 |
| merck-DB508953_a_at         | ABCB11                       | NM_003742                        | 0.133   | 2.28  | 0.0249 | 1.00 |
| merck2-NM_020139_at         | BDH2                         | NM_020139                        | 0.229   | 2.28  | 0.0249 | 1.00 |
| merck-AK125988_a_at         | ATP11C                       | NM_173694 NM_001010986           | 0.206   | 2.28  | 0.0249 | 1.00 |
| merck-BC111030_a_at         | SPRDE2                       | NM_032451                        | -0.178  | -2.28 | 0.0249 | 1.00 |
| merck2-NM_198964_a_at       | PTHLH                        | NM_002820 NM_198964              | 0.154   | 2.28  | 0.0249 | 1.00 |
| merck-NM_006939_at          | SOS2                         | NM_006939                        | -0.174  | -2.28 | 0.0249 | 1.00 |
| merck2-AK126360_at          | ---                          | AK126360                         | 0.194   | 2.28  | 0.0250 | 1.00 |
| merck-NM_016551_at          | TM7SF3                       | NM_016551                        | -0.127  | -2.28 | 0.0250 | 1.00 |
| merck-AV690960_at           | ---                          | ---                              | -0.120  | -2.28 | 0.0250 | 1.00 |
| merck-AK027787_a_at         | SLC25A32                     | NM_030780                        | 0.180   | 2.28  | 0.0250 | 1.00 |
| merck-BM810405_at           | ---                          | ---                              | -0.132  | -2.28 | 0.0251 | 1.00 |
| merck-BX111278_at           | ---                          | AL441885                         | -0.127  | -2.28 | 0.0251 | 1.00 |
| merck2-AI377384_at          | ---                          | ---                              | -0.108  | -2.28 | 0.0251 | 1.00 |
| merck2-ENST00000355476_at   | RBPJ                         | NM_005349 NM_015874 NM_203283 N  | -0.0934 | -2.28 | 0.0251 | 1.00 |
| merck-NM_016446_a_at        | TMEM8B                       | NM_001042590 NM_001042589 NM_01  | -0.188  | -2.28 | 0.0251 | 1.00 |
| merck-NM_000880_at          | IL7                          | NM_000880 NM_001199886 NM_00119  | 0.180   | 2.28  | 0.0251 | 1.00 |
| merck2-NM_001036645_x_at    | HHLA3                        | NM_001036645                     | 0.112   | 2.28  | 0.0251 | 1.00 |
| merck-NM_139214_s_at        | TGIF2LX TGIF2LY              | NM_138960 NM_139214              | -0.0922 | -2.28 | 0.0252 | 1.00 |
| merck-BC034299_at           | ---                          | BC034299                         | -0.147  | -2.28 | 0.0252 | 1.00 |
| merck-BC029907_s_at         | ---                          | BC029907                         | 0.234   | 2.28  | 0.0252 | 1.00 |
| merck-AK091312_at           | ---                          | AK091312                         | 0.189   | 2.27  | 0.0253 | 1.00 |
| merck-NM_023940_at          | RASL11B                      | NM_023940                        | 0.210   | 2.27  | 0.0253 | 1.00 |
| merck-AK056037_at           | LOC100272217                 | NR_027440                        | -0.161  | -2.27 | 0.0254 | 1.00 |
| merck-XM_929289_at          | ---                          | AC214986                         | -0.136  | -2.27 | 0.0254 | 1.00 |
| merck2-BF667260_at          | MTRR                         | NM_002454 NM_024010              | 0.219   | 2.27  | 0.0254 | 1.00 |
| merck-NM_002015_at          | FOXO1                        | NM_002015                        | 0.142   | 2.27  | 0.0254 | 1.00 |
| merck2-CB999623_at          | MLLT3                        | NM_004529                        | 0.175   | 2.27  | 0.0254 | 1.00 |
| merck-BX647246_at           | TKT                          | NM_001135055                     | -0.281  | -2.27 | 0.0255 | 1.00 |
| merck-BC064148_x_at         | FAM85B1                      | NR_026759                        | -0.163  | -2.27 | 0.0255 | 1.00 |
| merck2-NM_194441_at         | BTN3A1                       | NM_007048 NM_194441 NM_0011450C  | -0.223  | -2.27 | 0.0255 | 1.00 |
| merck-NM_001037125_at       | UNKL                         | NM_001037125                     | -0.185  | -2.27 | 0.0256 | 1.00 |
| merck-NM_001039876_at       | C19orf46                     | NM_001039876                     | -0.153  | -2.27 | 0.0256 | 1.00 |
| merck-XM_929880_s_at        | TLK2                         | NM_006852 NM_001112707 XR_11074: | -0.202  | -2.27 | 0.0257 | 1.00 |
| merck-NM_153446_at          | B4GALNT2                     | NM_153446 NM_001159387 NM_00115  | -0.154  | -2.27 | 0.0257 | 1.00 |
| merck-AA203478_at           | ---                          | ---                              | -0.121  | -2.27 | 0.0257 | 1.00 |
| merck-NM_005101_at          | ISG15                        | NM_005101                        | -0.426  | -2.27 | 0.0258 | 1.00 |
| merck2-Z22968_at            | CD163                        | NM_004244 NM_203416              | -0.193  | -2.27 | 0.0258 | 1.00 |
| merck-NM_133460_at          | ZNF418                       | NM_133460                        | 0.198   | 2.27  | 0.0258 | 1.00 |
| merck-AK024263_at           | SLC38A1                      | NM_030674 NM_001077484           | 0.232   | 2.26  | 0.0259 | 1.00 |
| merck2-BL070752_a_at        | OCAD1                        | NM_017830 NM_001079839 NM_00101  | 0.125   | 2.26  | 0.0259 | 1.00 |
| merck-BC032433_a_at         | ATF7                         | NM_001130059 NM_006856 NM_00113  | -0.177  | -2.26 | 0.0259 | 1.00 |
| merck-NM_015093_at          | TAB2                         | NM_015093                        | 0.168   | 2.26  | 0.0259 | 1.00 |
| merck-R12375_s_at           | ---                          | AC016654                         | 0.161   | 2.26  | 0.0259 | 1.00 |
| merck-NM_002855_at          | PVRL1                        | NM_002855                        | -0.181  | -2.26 | 0.0259 | 1.00 |
| merck2-CR623615_a_at        | FBXL16                       | NM_153350                        | 0.171   | 2.26  | 0.0260 | 1.00 |
| merck2-ENST00000375401_at   | KDM5C                        | NM_004187 NM_001146702           | 0.254   | 2.26  | 0.0261 | 1.00 |
| merck2-BC028370_at          | ---                          | ---                              | -0.288  | -2.26 | 0.0261 | 1.00 |
| merck-NM_199171_at          | PM2PA1                       | NM_020182 NM_199169 NM_199170 N  | 0.256   | 2.26  | 0.0261 | 1.00 |
| merck-NM_007052_at          | NOX1                         | NM_007052 NM_013955              | 0.226   | 2.26  | 0.0261 | 1.00 |
| merck-BC019906_s_at         | E1F2S3                       | NM_001415                        | 0.105   | 2.26  | 0.0261 | 1.00 |
| merck-BG57676_at            | NUDT10                       | NG_005422                        | -0.164  | -2.26 | 0.0261 | 1.00 |
| merck-NM_153183_at          | ZNF626                       | NM_153183                        | 0.201   | 2.26  | 0.0262 | 1.00 |
| merck2-NM_001076675_at      | IGHD                         | NM_001076675                     | 0.201   | 2.26  | 0.0262 | 1.00 |
| merck-AK128649_at           | ABLIM1                       | AK090461                         | 0.391   | 2.26  | 0.0262 | 1.00 |
| merck-BM977434_a_at         | CALML4                       | NM_002313 NM_001003407 NM_0010C  | 0.161   | 2.26  | 0.0263 | 1.00 |
| merck-AK062628_a_at         | ---                          | NM_033429 NM_001031733           | -0.204  | -2.26 | 0.0263 | 1.00 |
| merck2-AL134313_x_at        | ---                          | ---                              | -0.118  | -2.26 | 0.0263 | 1.00 |
| merck-BM151384_at           | ---                          | ---                              | -0.157  | -2.26 | 0.0264 | 1.00 |
| merck2-NM_181335_s_at       | ---                          | ---                              | -0.191  | -2.26 | 0.0264 | 1.00 |
| merck-XM_377529_at          | ---                          | NG_021764                        | -0.110  | -2.26 | 0.0264 | 1.00 |
| merck2-NM_001007526_s_at    | ---                          | ---                              | -0.101  | -2.26 | 0.0265 | 1.00 |
| merck2-AK057887_at          | ---                          | AK057887                         | 0.181   | 2.25  | 0.0266 | 1.00 |
| merck-BF170817_at           | ---                          | ---                              | 0.147   | 2.25  | 0.0266 | 1.00 |
| merck-NM_000983_at          | RPL22                        | NM_000983                        | 0.117   | 2.25  | 0.0266 | 1.00 |
| merck-BF373138_at           | ---                          | ---                              | -0.0933 | -2.25 | 0.0266 | 1.00 |
| merck-AK093292_at           | LOC283501                    | AK093292                         | -0.130  | -2.25 | 0.0266 | 1.00 |
| merck-NM_139179_at          | DAGLB                        | NM_139179 NM_001142936           | -0.242  | -2.25 | 0.0266 | 1.00 |
| merck-BC035064_at           | ---                          | BC035064                         | -0.123  | -2.25 | 0.0266 | 1.00 |
| merck-NM_031297_s_at        | RNF208                       | NM_031297                        | -0.144  | -2.25 | 0.0266 | 1.00 |
| merck2-DQ890613_a_at        | CHN1                         | NM_001822 NM_001025201           | 0.202   | 2.25  | 0.0266 | 1.00 |
| merck-ENST00000326838_at    | NKAPP1                       | NR_027131                        | 0.140   | 2.25  | 0.0267 | 1.00 |
| merck-NM_004672_at          | MAP3K6                       | NM_004672                        | -0.182  | -2.25 | 0.0267 | 1.00 |
| merck-NM_003538_at          | HIST1H4A                     | NM_003538                        | -0.157  | -2.25 | 0.0267 | 1.00 |
| merck-BM962256_at           | ---                          | ---                              | -0.133  | -2.25 | 0.0267 | 1.00 |
| merck-AI637893_at           | CC2D2B                       | AL139120                         | -0.152  | -2.25 | 0.0267 | 1.00 |
| merck-NM_001001732_at       | LOC100291323                 | NM_001159747 NM_001001732        | -0.136  | -2.25 | 0.0268 | 1.00 |
| merck-BC030635_at           | ---                          | BC030635                         | 0.405   | 2.25  | 0.0268 | 1.00 |
| merck-DQ323013_x_at         | ---                          | ---                              | 0.120   | 2.25  | 0.0269 | 1.00 |
| merck2-AK055020_at          | NAP1L1                       | NM_139207 NM_004537              | 0.112   | 2.25  | 0.0269 | 1.00 |
| merck2-CF131182_s_at        | ---                          | ---                              | 0.151   | 2.25  | 0.0269 | 1.00 |
| merck-ENST00000327581_a_at  | NTSDC4                       | BC041437                         | -0.181  | -2.25 | 0.0270 | 1.00 |
| merck-NM_003022_at          | TCF7                         | NM_003022 NM_201632 NM_0011348E  | -0.161  | -2.25 | 0.0270 | 1.00 |
| merck-NM_005480_at          | TROAP                        | NM_005480                        | -0.152  | -2.25 | 0.0271 | 1.00 |
| merck-BC110370_at           | ABC85                        | NM_001163993                     | -0.0966 | -2.25 | 0.0271 | 1.00 |
| merck-CR595881_at           | ---                          | CR608336                         | -0.136  | -2.25 | 0.0271 | 1.00 |
| merck-AF116672_at           | C8orf39                      | NR_027259                        | -0.140  | -2.25 | 0.0271 | 1.00 |
| merck2-AK020734_a_at        | HPD3D5                       | NM_014485                        | -0.194  | -2.25 | 0.0271 | 1.00 |
| merck2-AY358900_at          | COCH                         | NM_001135058 NM_004086           | 0.327   | 2.24  | 0.0272 | 1.00 |
| merck-NM_006595_at          | AP15                         | NM_001142930 NM_006595 NM_00114  | 0.137   | 2.24  | 0.0272 | 1.00 |
| merck2-AY345857_x_at        | WWP1                         | NM_007013                        | 0.120   | 2.24  | 0.0272 | 1.00 |
| merck2-CR936605_at          | ZNF667                       | NM_022103 NR_030740              | 0.119   | 2.24  | 0.0272 | 1.00 |
| merck-XM_497480_at          | ---                          | ---                              | 0.158   | 2.24  | 0.0272 | 1.00 |
| merck2-AJ270695_at          | BHLHE41                      | NM_030762                        | 0.240   | 2.24  | 0.0273 | 1.00 |
| merck-U43677_s_at           | FCAR                         | NM_002000 NM_133269 NM_133271 N  | -0.205  | -2.24 | 0.0273 | 1.00 |

|                             |                                 |                                 |         |       |        |      |
|-----------------------------|---------------------------------|---------------------------------|---------|-------|--------|------|
| merck2-NM_001042780_a_at    | TNNT3                           | NM_006757 NM_001042781 NM_00104 | -0.180  | -2.24 | 0.0273 | 1.00 |
| merck2-AF379633_x_at        | ---                             | ---                             | -0.111  | -2.24 | 0.0273 | 1.00 |
| merck-NM_000266_at          | NDP                             | NM_000266                       | 0.268   | 2.24  | 0.0275 | 1.00 |
| merck2-AK057931_at          | RSPH3                           | NM_031924                       | -0.230  | -2.24 | 0.0275 | 1.00 |
| merck-XM_938074_at          | LOC390760                       | XM_001715760 XM_001717472 XM_00 | 0.170   | 2.24  | 0.0275 | 1.00 |
| merck2-NM_001018008_at      | TPM1                            | NM_001018008                    | -0.173  | -2.24 | 0.0275 | 1.00 |
| merck-AK097071_s_at         | ---                             | ---                             | 0.334   | 2.24  | 0.0275 | 1.00 |
| merck-NM_021572_a_at        | ENPP5                           | NM_021572                       | 0.187   | 2.24  | 0.0276 | 1.00 |
| merck-AF093744_at           | LOC100288675                    | AF093744                        | 0.226   | 2.24  | 0.0277 | 1.00 |
| merck2-NM_022739_at         | SMURF2                          | NM_022739                       | 0.170   | 2.24  | 0.0277 | 1.00 |
| merck-CB242128_s_at         | ---                             | AC006287                        | 0.146   | 2.24  | 0.0277 | 1.00 |
| merck-NM_003643_at          | GCM1                            | NM_003643                       | -0.252  | -2.24 | 0.0277 | 1.00 |
| merck-ENST00000328798_at    | OK/SW-CL.36                     | AB064670                        | -0.204  | -2.24 | 0.0277 | 1.00 |
| merck2-NM_001039535_a_at    | SKA1                            | NM_001039535 NM_145060          | -0.185  | -2.24 | 0.0277 | 1.00 |
| merck-AL534381_a_at         | BAZ2B                           | NM_013450                       | -0.159  | -2.24 | 0.0277 | 1.00 |
| merck-BQ023373_at           | ---                             | AL110203                        | 0.172   | 2.24  | 0.0277 | 1.00 |
| merck-BM552168_at           | ---                             | ---                             | -0.131  | -2.24 | 0.0277 | 1.00 |
| merck2-BM677789_x_at        | ---                             | ---                             | -0.123  | -2.24 | 0.0278 | 1.00 |
| merck-AF109362_a_at         | SCD                             | NM_005063                       | -0.187  | -2.24 | 0.0278 | 1.00 |
| merck-NM_005958_at          | MTNR1A                          | NM_005958                       | -0.127  | -2.24 | 0.0278 | 1.00 |
| merck-ENST00000355337_x_at  | CTAGE4 CTAGE9 CTAGE15P CTAGE8   | NM_198495 NM_001145659 NM_0010C | 0.154   | 2.24  | 0.0278 | 1.00 |
| merck-ENST00000379900_x_at  | ---                             | XM_003120441                    | 0.137   | 2.24  | 0.0278 | 1.00 |
| merck-ENST00000344523_at    | ---                             | AL354979                        | -0.212  | -2.24 | 0.0278 | 1.00 |
| merck-NM_000773_at          | CYP2E1                          | NM_000773                       | 0.193   | 2.23  | 0.0278 | 1.00 |
| merck-NM_133625_at          | SYN2                            | NM_133625                       | -0.199  | -2.23 | 0.0279 | 1.00 |
| merck-NM_014792_at          | KIAA0125                        | NR_026800                       | 0.386   | 2.23  | 0.0279 | 1.00 |
| merck-BE746223_at           | ---                             | ---                             | 0.147   | 2.23  | 0.0279 | 1.00 |
| merck-CX752796_at           | LOC253842                       | BC027988                        | -0.196  | -2.23 | 0.0279 | 1.00 |
| merck-NM_198486_at          | RPL7L1                          | NM_198486                       | -0.181  | -2.23 | 0.0280 | 1.00 |
| merck-NM_054108_s_at        | HRASLS5                         | NM_054108 NM_001146729 NM_00114 | -0.134  | -2.23 | 0.0280 | 1.00 |
| merck-NC_001357_ORF_1184_at | ---                             | ---                             | -0.120  | -2.23 | 0.0280 | 1.00 |
| merck-AI762342_at           | ---                             | AL953870                        | 0.297   | 2.23  | 0.0280 | 1.00 |
| merck-NM_001231_at          | CASQ1                           | NM_001231                       | -0.139  | -2.23 | 0.0280 | 1.00 |
| merck-NM_001004355_a_at     | ---                             | XR_109778 XR_113319 XR_115608   | 0.226   | 2.23  | 0.0281 | 1.00 |
| merck-CR613436_s_at         | ---                             | CR613436                        | 0.410   | 2.23  | 0.0281 | 1.00 |
| merck-BX648739_at           | C19orf50                        | BX648739                        | -0.112  | -2.23 | 0.0281 | 1.00 |
| merck-NM_013438_at          | UBQLN1                          | NM_013438 NM_053067             | 0.151   | 2.23  | 0.0281 | 1.00 |
| merck-NM_024764_at          | CATSPERB                        | NM_024764                       | 0.233   | 2.23  | 0.0281 | 1.00 |
| merck2-BX648936_at          | ---                             | BX648936                        | -0.152  | -2.23 | 0.0281 | 1.00 |
| merck-ENST00000248668_at    | ---                             | ---                             | -0.172  | -2.23 | 0.0281 | 1.00 |
| merck-NM_012470_a_at        | TNPO3                           | NM_012470 NM_001191028 NR_03405 | -0.161  | -2.23 | 0.0281 | 1.00 |
| merck-NM_015296_at          | DOCK9                           | NM_015296 NM_001130048          | 0.263   | 2.23  | 0.0281 | 1.00 |
| merck-HCT2345774_at         | ---                             | AC138657                        | 0.137   | 2.23  | 0.0282 | 1.00 |
| merck2-AF054889_at          | MDFC                            | NM_001166345 NM_199072          | 0.263   | 2.23  | 0.0282 | 1.00 |
| merck2-BX104084_x_at        | ---                             | AC018688                        | -0.0665 | -2.23 | 0.0282 | 1.00 |
| merck-AY078405_s_at         | ABCC6 ABCC6P2                   | NM_001079528 NR_023387          | -0.222  | -2.23 | 0.0282 | 1.00 |
| merck-NM_012286_at          | MORF4L2                         | NM_001142418 NM_001142426 NM_00 | 0.132   | 2.23  | 0.0283 | 1.00 |
| merck2-AL117392_at          | CGGBP1                          | NM_001008390 NM_003663 NM_00115 | 0.189   | 2.23  | 0.0283 | 1.00 |
| merck-NM_207644_s_at        | C22orf36                        | NM_207644                       | -0.169  | -2.23 | 0.0284 | 1.00 |
| merck-NM_030775_at          | WNT5B                           | NM_032642 NM_030775             | -0.179  | -2.23 | 0.0284 | 1.00 |
| merck-ENST00000274705_at    | PCDH18                          | NR_001281                       | 0.183   | 2.23  | 0.0284 | 1.00 |
| merck-BIB29805_at           | ---                             | AL512410                        | 0.110   | 2.23  | 0.0284 | 1.00 |
| merck-NM_006850_s_at        | IL24                            | NM_006850 NM_001185156 NM_00118 | 0.197   | 2.23  | 0.0284 | 1.00 |
| merck-DB122906_a_at         | PLEKHB1                         | NM_021200 NM_001130034 NM_00113 | 0.166   | 2.23  | 0.0284 | 1.00 |
| merck-NM_139204_s_at        | EPS8L1                          | NM_133180 NM_017729             | -0.177  | -2.23 | 0.0284 | 1.00 |
| merck-NM_058174_s_at        | COL6A2                          | NM_058175 NM_058174             | -0.129  | -2.23 | 0.0285 | 1.00 |
| merck-BC026185_a_at         | SCCPDH                          | NR_001602                       | -0.192  | -2.23 | 0.0285 | 1.00 |
| merck-XM_939741_at          | ---                             | ---                             | -0.124  | -2.23 | 0.0285 | 1.00 |
| merck2-AI924182_at          | ---                             | ---                             | -0.122  | -2.22 | 0.0285 | 1.00 |
| merck-NM_003141_at          | TRIM21                          | NM_003141                       | -0.163  | -2.22 | 0.0286 | 1.00 |
| merck2-AY358811_at          | FGF18                           | NM_003862                       | -0.148  | -2.22 | 0.0286 | 1.00 |
| merck-NM_003011_at          | SEI                             | NM_001122821 NM_003011          | 0.0985  | 2.22  | 0.0287 | 1.00 |
| merck2-AV098107_at          | SPICE1                          | NM_144718                       | 0.133   | 2.22  | 0.0287 | 1.00 |
| merck2-BX640705_at          | ZNF44                           | BX640705                        | 0.174   | 2.22  | 0.0287 | 1.00 |
| merck-AA032155_at           | LOC158572                       | NR_026742                       | 0.182   | 2.22  | 0.0287 | 1.00 |
| merck2-BC062720_at          | HEATR5A                         | BC062720                        | -0.270  | -2.22 | 0.0289 | 1.00 |
| merck2-CD703280_at          | ---                             | ---                             | 0.435   | 2.22  | 0.0289 | 1.00 |
| merck2-BG740130_at          | ---                             | ---                             | 0.122   | 2.22  | 0.0289 | 1.00 |
| merck-AV692789_at           | ---                             | AC096642                        | 0.266   | 2.22  | 0.0289 | 1.00 |
| merck2-BM685558_at          | SART1                           | NM_005146                       | -0.150  | -2.22 | 0.0289 | 1.00 |
| merck-AF125530_a_at         | ARL6IP5                         | NM_006407                       | 0.114   | 2.22  | 0.0289 | 1.00 |
| merck2-BC110817_at          | TXLNG2P                         | BC110817                        | -0.512  | -2.22 | 0.0290 | 1.00 |
| merck2-H17596_at            | CLEC2D                          | NM_013269 NM_001004419 NM_00115 | 0.219   | 2.22  | 0.0290 | 1.00 |
| merck-ENST00000302098_x_at  | NBPF11 NBPF24 LOC100506032 KIAA | NM_183372 NM_001101663 XM_00311 | 0.109   | 2.22  | 0.0290 | 1.00 |
| merck-NM_004106_at          | FGFR1G                          | NM_004106                       | -0.0930 | -2.22 | 0.0291 | 1.00 |
| merck-AJ297964_a_at         | ---                             | AJ297964                        | -0.205  | -2.22 | 0.0291 | 1.00 |
| merck-BC064407_s_at         | FAM107B                         | NM_031453                       | 0.0994  | 2.22  | 0.0291 | 1.00 |
| merck-NM_002462_at          | MX1                             | NM_001144925 NM_002462 NM_00117 | -0.409  | -2.22 | 0.0292 | 1.00 |
| merck2-NM_198881_at         | TBC1D8B                         | NM_198881                       | 0.360   | 2.22  | 0.0292 | 1.00 |
| merck-BX103488_at           | ---                             | ---                             | -0.144  | -2.21 | 0.0292 | 1.00 |
| merck2-CD709897_x_at        | HSPA8                           | NM_006597                       | 0.168   | 2.21  | 0.0292 | 1.00 |
| merck-NM_001039661_s_at     | TIRAP                           | NM_001039661                    | -0.165  | -2.21 | 0.0292 | 1.00 |
| merck-NM_005241_a_at        | MECOM                           | NM_001105077 NM_005241 NM_00110 | 0.192   | 2.21  | 0.0292 | 1.00 |
| merck2-AJ717664_at          | BTLA                            | NM_181780 NM_001085357          | 0.215   | 2.21  | 0.0292 | 1.00 |
| merck-NM_015130_s_at        | TBC1D9                          | NM_015130                       | 0.215   | 2.21  | 0.0293 | 1.00 |
| merck-NM_018593_s_at        | SLC16A10                        | NM_018593                       | 0.266   | 2.21  | 0.0293 | 1.00 |
| merck-XM_087021_at          | ---                             | ---                             | -0.124  | -2.21 | 0.0293 | 1.00 |
| merck-CR611332_s_at         | PURA                            | NM_005859                       | 0.236   | 2.21  | 0.0293 | 1.00 |
| merck-BX647997_a_at         | MTMR2                           | NM_016156 NM_201278 NM_201281 N | 0.137   | 2.21  | 0.0294 | 1.00 |
| merck-NM_002935_at          | RNASE3                          | NM_002935                       | -0.491  | -2.21 | 0.0294 | 1.00 |
| merck-CX757198_at           | ---                             | ---                             | -0.142  | -2.21 | 0.0294 | 1.00 |
| merck2-DR000578_a_at        | ADPMT4                          | NM_020133                       | -0.149  | -2.21 | 0.0294 | 1.00 |
| merck2-CX865413_x_at        | LDBB                            | NM_002300 NM_001174097          | 0.157   | 2.21  | 0.0294 | 1.00 |
| merck-AK023472_at           | CDC419                          | NM_173463 NM_001130726          | -0.221  | -2.21 | 0.0294 | 1.00 |
| merck-AK022171_at           | ---                             | AK022171                        | -0.163  | -2.21 | 0.0294 | 1.00 |
| merck-BF374857_x_at         | ---                             | NG_021754                       | -0.134  | -2.21 | 0.0295 | 1.00 |
| merck2-BM310811_at          | ---                             | ---                             | -0.107  | -2.21 | 0.0295 | 1.00 |
| merck-AV243584_at           | ---                             | AC005570                        | -0.163  | -2.21 | 0.0296 | 1.00 |
| merck-NM_005094_s_at        | SLC27A4                         | NM_005094                       | -0.155  | -2.21 | 0.0296 | 1.00 |
| merck-ENST00000377260_a_at  | CTNNBIP1                        | NM_020248 NM_001012329          | -0.102  | -2.21 | 0.0296 | 1.00 |
| merck-BC065527_a_at         | ---                             | XR_110885                       | -0.149  | -2.21 | 0.0296 | 1.00 |
| merck-AU142077_at           | TTL3 ARPC4-TTL3                 | NM_001025930 NM_001198793 NR_03 | -0.170  | -2.21 | 0.0297 | 1.00 |
| merck2-AA812559_at          | WBP2NL                          | AF393575                        | -0.145  | -2.21 | 0.0297 | 1.00 |
| merck-NM_020897_x_at        | HCH3                            | NM_020897                       | -0.188  | -2.21 | 0.0297 | 1.00 |
| merck2-BC071885_at          | LOXL3                           | NM_032603                       | -0.214  | -2.21 | 0.0297 | 1.00 |
| merck-ENST00000360119_a_at  | NLGN1                           | NM_014932                       | 0.186   | 2.21  | 0.0297 | 1.00 |
| merck-DB312486_s_at         | NEK3                            | AL833951                        | -0.203  | -2.21 | 0.0298 | 1.00 |
| merck2-AF059195_a_at        | MAFG                            | NM_002359 NM_032711             | -0.125  | -2.21 | 0.0298 | 1.00 |
| merck-X96681_s_at           | SNORD61                         | NR_002735                       | 0.180   | 2.21  | 0.0298 | 1.00 |
| merck2-NM_013289_x_at       | KIR3DL1                         | NM_013289                       | -0.417  | -2.21 | 0.0298 | 1.00 |
| merck-NM_153218_a_at        | LAOC1                           | NM_001128303 NM_153218          | -0.175  | -2.21 | 0.0298 | 1.00 |
| merck-G65685_at             | ---                             | BX323860                        | -0.134  | -2.21 | 0.0298 | 1.00 |
| merck2-AF026941_a_at        | RSAD2                           | NM_080657                       | -0.523  | -2.21 | 0.0299 | 1.00 |
| merck-AL359566_at           | ---                             | AL359566                        | 0.391   | 2.21  | 0.0299 | 1.00 |
| merck2-AB011175_at          | TBC1D4                          | NM_014832                       | 0.288   | 2.21  | 0.0299 | 1.00 |
| merck-AK027107_at           | ---                             | AK027107                        | -0.153  | -2.21 | 0.0299 | 1.00 |
| merck2-CV420128_at          | ---                             | ---                             | -0.196  | -2.20 | 0.0299 | 1.00 |
| merck2-NM_004019_at         | DMD                             | NM_004019                       | 0.305   | 2.20  | 0.0300 | 1.00 |
| merck-ENST00000324446_a_at  | NCRNA00185                      | NR_001544                       | -0.223  | -2.20 | 0.0300 | 1.00 |
| merck-XM_936725_at          | ---                             | ---                             | -0.145  | -2.20 | 0.0300 | 1.00 |
| merck-NM_001024210_at       | S100A13                         | NM_001024210 NM_005979 NM_0010C | -0.204  | -2.20 | 0.0300 | 1.00 |
| merck2-AK125843_x_at        | SLC6A8 SLC6A10P                 | NM_005629 NM_001142805 NM_00114 | -0.312  | -2.20 | 0.0301 | 1.00 |
| merck-NM_144689_at          | ZNF420                          | NM_144689                       | 0.232   | 2.20  | 0.0301 | 1.00 |
| merck-AK024021_a_at         | C12orf23                        | NM_152261                       | 0.232   | 2.20  | 0.0301 | 1.00 |
| merck2-BQ379815_at          | ---                             | ---                             | -0.142  | -2.20 | 0.0301 | 1.00 |
| merck-ENST00000325558_s_at  | PGA3 PGA4 PGA5                  | NM_001079807 NM_001079808 NM_01 | -0.361  | -2.20 | 0.0301 | 1.00 |
| merck2-AB209527_s_at        | HNRNPFC                         | NM_031314 NM_004500 NM_00107744 | 0.0700  | 2.20  | 0.0301 | 1.00 |
| merck2-NM_002608_a_at       | PDGFRB                          | NM_002608 NM_033016             | 0.143   | 2.20  | 0.0302 | 1.00 |
| merck-NM_003441_at          | ZNF141                          | L15309                          | 0.252   | 2.20  | 0.0302 | 1.00 |

|                              |                     |                                  |         |       |        |      |
|------------------------------|---------------------|----------------------------------|---------|-------|--------|------|
| merck2-BU166338_at           | <b>HNRNPA0</b>      | NM_006805                        | 0.138   | 2.20  | 0.0302 | 1.00 |
| merck2-VZV_OKA_O38_up_at     | ---                 | ---                              | -0.0928 | -2.20 | 0.0302 | 1.00 |
| merck2-BU169961_at           | <b>NUMA1</b>        | NM_006185                        | -0.241  | -2.20 | 0.0302 | 1.00 |
| merck2-NM_080657_at          | <b>RSAD2</b>        | NM_080657                        | -0.643  | -2.20 | 0.0302 | 1.00 |
| merck2-NM_031481_at          | <b>SLC25A18</b>     | NM_031481                        | -0.146  | -2.20 | 0.0302 | 1.00 |
| merck2-ENST00000390243_at    | ---                 | AF490937                         | 0.277   | 2.20  | 0.0302 | 1.00 |
| merck2-ENST00000314053_at    | ---                 | AF116673                         | 0.155   | 2.20  | 0.0302 | 1.00 |
| merck2-AF244577_a_at         | <b>SLC17A5</b>      | NM_012434                        | -0.154  | -2.20 | 0.0303 | 1.00 |
| merck2-BF271655_s_at         | <b>ADLP2</b>        | NM_001642 NM_00142276 NM_00114   | -0.247  | -2.20 | 0.0303 | 1.00 |
| merck2-M55296_at             | <b>ABL2</b>         | NM_007314 NM_005158 NM_0011360C  | -0.157  | -2.20 | 0.0303 | 1.00 |
| merck2-NM_002961_s_at        | <b>S100A4</b>       | NM_002961 NM_019554              | -0.0677 | -2.20 | 0.0304 | 1.00 |
| merck2-AY128643_at           | <b>PMEPA1</b>       | NM_020182 NM_199169 NM_199170 N  | 0.240   | 2.20  | 0.0304 | 1.00 |
| merck2-NM_145040_at          | <b>PRKCDDBP</b>     | NM_145040                        | -0.156  | -2.20 | 0.0304 | 1.00 |
| merck2-BG674122_a_at         | <b>HLF</b>          | NM_002126                        | 0.143   | 2.20  | 0.0304 | 1.00 |
| merck2-NM_000633_at          | <b>BC2L</b>         | NM_000633                        | 0.155   | 2.20  | 0.0304 | 1.00 |
| merck2-BC013099_a_at         | <b>CABIN1</b>       | NM_001199281 NM_012295 NM_0012C  | -0.156  | -2.20 | 0.0305 | 1.00 |
| merck2-NM_025170_at          | <b>PREX2</b>        | NM_025170                        | 0.236   | 2.20  | 0.0305 | 1.00 |
| merck2-NM_005782_at          | <b>THOC4</b>        | NM_005782                        | -0.138  | -2.20 | 0.0305 | 1.00 |
| merck2-AI092890_a_at         | <b>ZNF704</b>       | NM_001033723                     | -0.124  | -2.20 | 0.0305 | 1.00 |
| merck2-BC013872_at           | <b>TP73-AS1</b>     | NR_033711 NR_033710 NR_033709 NR | 0.112   | 2.20  | 0.0305 | 1.00 |
| merck2-NM_015129_at          | <b>SEPT6</b>        | NM_145799 NM_015129              | 0.200   | 2.20  | 0.0306 | 1.00 |
| merck2-BC082765_at           | <b>TMEM8B</b>       | NM_001042590 NM_001042589        | -0.124  | -2.20 | 0.0307 | 1.00 |
| merck2-NM_001935_at          | <b>DP4</b>          | NM_001935                        | 0.230   | 2.19  | 0.0307 | 1.00 |
| merck2-NM_017762_at          | ---                 | ---                              | -0.176  | -2.19 | 0.0307 | 1.00 |
| merck2-ENST00000372183_a_at  | <b>EIF2B3</b>       | NM_020365 NM_001166588           | -0.112  | -2.19 | 0.0307 | 1.00 |
| merck2-XM_926822_x_at        | ---                 | ---                              | 0.150   | 2.19  | 0.0307 | 1.00 |
| merck2-AW516917_a_at         | <b>LOC146580</b>    | NR_027487                        | -0.150  | -2.19 | 0.0308 | 1.00 |
| merck2-AL53240_at            | <b>TMEM66</b>       | NM_016127                        | 0.174   | 2.19  | 0.0308 | 1.00 |
| merck2-NM_003465_at          | <b>CHIT1</b>        | NM_003465                        | -0.271  | -2.19 | 0.0308 | 1.00 |
| merck2-XM_943972_at          | ---                 | AC074363                         | -0.0895 | -2.19 | 0.0308 | 1.00 |
| merck2-NM_022803_at          | <b>UCP3</b>         | NM_003356 NM_022803              | -0.150  | -2.19 | 0.0308 | 1.00 |
| merck2-CMV_UL94_at           | ---                 | ---                              | -0.142  | -2.19 | 0.0308 | 1.00 |
| merck2-AI399709_at           | <b>BAZ2B</b>        | NM_0013450                       | -0.154  | -2.19 | 0.0308 | 1.00 |
| merck2-ENST00000215935_x_at  | ---                 | ---                              | -0.125  | -2.19 | 0.0309 | 1.00 |
| merck2-AK026568_x_at         | ---                 | ---                              | 0.0633  | 2.19  | 0.0309 | 1.00 |
| merck2-AW194700_a_at         | <b>NR2F2</b>        | NM_001145155                     | -0.138  | -2.19 | 0.0309 | 1.00 |
| merck2-AC_000017_ORF_1085_at | ---                 | ---                              | -0.102  | -2.19 | 0.0309 | 1.00 |
| merck2-NM_139241_at          | <b>FGD4</b>         | NM_139241                        | -0.265  | -2.19 | 0.0309 | 1.00 |
| merck2-NM_052956_s_at        | <b>ACSM1</b>        | NM_052956                        | -0.128  | -2.19 | 0.0310 | 1.00 |
| merck2-NM_032140_at          | <b>C16orf48</b>     | NM_032140                        | -0.127  | -2.19 | 0.0310 | 1.00 |
| merck2-Y16708_x_at           | ---                 | Y16708                           | -0.141  | -2.19 | 0.0310 | 1.00 |
| merck2-CD672190_a_at         | <b>PLCE1</b>        | NM_016341 NM_001165979           | -0.142  | -2.19 | 0.0310 | 1.00 |
| merck2-CD709967_at           | <b>HSPA8</b>        | AK310467                         | 0.199   | 2.19  | 0.0311 | 1.00 |
| merck2-NM_001005861_at       | <b>RYK</b>          | NM_001005861 NM_002958           | 0.149   | 2.19  | 0.0311 | 1.00 |
| merck2-BC034591_at           | <b>LOC284648</b>    | NR_036490                        | -0.145  | -2.19 | 0.0311 | 1.00 |
| merck2-NM_021183_at          | <b>RAP2C</b>        | NM_021183                        | 0.226   | 2.19  | 0.0311 | 1.00 |
| merck2-BC019877_at           | ---                 | BC019877                         | -0.126  | -2.19 | 0.0311 | 1.00 |
| merck2-AK027399_s_at         | <b>ZFYVE1</b>       | NM_021260 NM_178441              | -0.170  | -2.19 | 0.0311 | 1.00 |
| merck2-NM_031889_at          | <b>ENAM</b>         | NM_031889                        | 0.254   | 2.19  | 0.0311 | 1.00 |
| merck2-CR595807_at           | ---                 | CR595807                         | 0.308   | 2.19  | 0.0311 | 1.00 |
| merck2-AK130024_at           | ---                 | XM_003118742 XM_003119680 XM_00  | 0.152   | 2.19  | 0.0311 | 1.00 |
| merck2-AA17759_a_at          | <b>LOC10050587</b>  | XR_110833                        | 0.240   | 2.19  | 0.0312 | 1.00 |
| merck2-AK027738_at           | <b>FOX P1</b>       | BX647682                         | 0.127   | 2.19  | 0.0312 | 1.00 |
| merck2-AK027821_a_at         | <b>TSEN2</b>        | NM_025265 NM_001145392 NM_00114  | 0.167   | 2.19  | 0.0312 | 1.00 |
| merck2-NM_004850_a_at        | <b>ROCK2</b>        | NM_004850                        | -0.121  | -2.19 | 0.0313 | 1.00 |
| merck2-ENST00000309184_s_at  | ---                 | AJ404607                         | -0.262  | -2.19 | 0.0314 | 1.00 |
| merck2-NM_004778_at          | <b>PTGDR2</b>       | NM_004778                        | -0.231  | -2.18 | 0.0314 | 1.00 |
| merck2-NM_199227_s_at        | <b>METAP1D</b>      | NM_199227                        | 0.143   | 2.18  | 0.0315 | 1.00 |
| merck2-BC014494_at           | ---                 | BC014494                         | -0.143  | -2.18 | 0.0315 | 1.00 |
| merck2-AF130047_at           | ---                 | AF130047                         | -0.131  | -2.18 | 0.0315 | 1.00 |
| merck2-AK124553_at           | <b>EML6</b>         | NM_001039753                     | 0.265   | 2.18  | 0.0315 | 1.00 |
| merck2-ENST00000376775_at    | <b>LOC729275</b>    | AK129559                         | 0.284   | 2.18  | 0.0315 | 1.00 |
| merck2-BI005840_at           | ---                 | ---                              | -0.117  | -2.18 | 0.0315 | 1.00 |
| merck2-BX641100_at           | ---                 | ---                              | -0.124  | -2.18 | 0.0315 | 1.00 |
| merck2-NM_080681_a_at        | <b>COL11A2</b>      | NM_080680 NM_080681 NM_080679    | -0.151  | -2.18 | 0.0315 | 1.00 |
| merck2-ENST00000375258_at    | <b>METTL8</b>       | NM_024770                        | 0.208   | 2.18  | 0.0316 | 1.00 |
| merck2-AB209912_a_at         | <b>THBS1</b>        | NM_003246                        | -0.362  | -2.18 | 0.0316 | 1.00 |
| merck2-BX647131_at           | <b>RBMX</b>         | NM_001164803                     | 0.173   | 2.18  | 0.0316 | 1.00 |
| merck2-BM668105_a_at         | <b>CUX1</b>         | NM_181552 NM_001202543 XR_10885  | -0.130  | -2.18 | 0.0316 | 1.00 |
| merck2-BC018124_at           | <b>HSPH1</b>        | NM_006644                        | 0.122   | 2.18  | 0.0316 | 1.00 |
| merck2-AI003348_at           | <b>NMNAT2</b>       | NM_015039 NM_170706              | -0.113  | -2.18 | 0.0316 | 1.00 |
| merck2-ENST00000263850_a_at  | <b>TPD52</b>        | NM_001025252 NM_001025253 NM_0C  | 0.297   | 2.18  | 0.0317 | 1.00 |
| merck2-AK131093_a_at         | <b>CHIT1</b>        | NM_003465                        | -0.269  | -2.18 | 0.0317 | 1.00 |
| merck2-AK128370_at           | <b>CD160</b>        | NM_007053                        | 0.345   | 2.18  | 0.0317 | 1.00 |
| merck2-NM_001877_at          | <b>CR2</b>          | NM_001006658 NM_001877           | 0.258   | 2.18  | 0.0317 | 1.00 |
| merck2-BE935035_at           | ---                 | ---                              | 0.320   | 2.18  | 0.0318 | 1.00 |
| merck2-NM_001007545_at       | <b>HEATR1</b>       | BC062442                         | -0.135  | -2.18 | 0.0318 | 1.00 |
| merck2-M80919_at             | ---                 | ---                              | 0.116   | 2.18  | 0.0319 | 1.00 |
| merck2-NM_013269_x_at        | <b>CLEC2D</b>       | NM_013269 NM_001004419 NM_00115  | 0.133   | 2.18  | 0.0319 | 1.00 |
| merck2-ENST00000343315_s_at  | <b>TMPO</b>         | NM_001032283 NM_001032284        | 0.187   | 2.18  | 0.0319 | 1.00 |
| merck2-BI119190_at           | ---                 | ---                              | 0.177   | 2.18  | 0.0319 | 1.00 |
| merck2-AL831948_at           | ---                 | AL831948                         | -0.158  | -2.18 | 0.0320 | 1.00 |
| merck2-BF683837_at           | ---                 | ---                              | -0.103  | -2.18 | 0.0320 | 1.00 |
| merck2-AL137325_at           | ---                 | AL137325                         | 0.145   | 2.18  | 0.0320 | 1.00 |
| merck2-XM_945176_a_at        | ---                 | AL035078                         | -0.118  | -2.18 | 0.0320 | 1.00 |
| merck2-VZV_OKA_ORF32_at      | ---                 | NC_001348                        | -0.0885 | -2.18 | 0.0320 | 1.00 |
| merck2-VZV_OKA_ORF9_at       | ---                 | NC_001348                        | -0.132  | -2.18 | 0.0320 | 1.00 |
| merck2-AB209742_at           | <b>PARP9</b>        | NM_001146106                     | -0.292  | -2.18 | 0.0321 | 1.00 |
| merck2-BX537545_a_at         | ---                 | BX537545                         | 0.185   | 2.18  | 0.0321 | 1.00 |
| merck2-CA428475_at           | ---                 | AC018978                         | -0.102  | -2.18 | 0.0321 | 1.00 |
| merck2-ENST00000359646_a_at  | <b>RBM12</b>        | NM_006047 NM_152638 NM_00119883  | 0.208   | 2.18  | 0.0321 | 1.00 |
| merck2-NM_152133_at          | <b>TAGAP</b>        | NM_152133 NM_054114              | 0.115   | 2.18  | 0.0321 | 1.00 |
| merck2-U18914_a_at           | <b>TPD52</b>        | NM_001025252 NM_001025253 NM_0C  | 0.236   | 2.18  | 0.0322 | 1.00 |
| merck2-NM_152312_at          | <b>GYLTL1B</b>      | NM_152312                        | 0.156   | 2.18  | 0.0322 | 1.00 |
| merck2-BX358637_a_at         | <b>MMP11</b>        | NM_005940                        | -0.149  | -2.17 | 0.0322 | 1.00 |
| merck2-NM_001004316_at       | <b>LEKR1</b>        | NM_001004316                     | 0.195   | 2.17  | 0.0322 | 1.00 |
| merck2-BC017925_at           | <b>LMO03</b>        | NM_198271                        | -0.125  | -2.17 | 0.0323 | 1.00 |
| merck2-AV254189_at           | <b>FAM129C</b>      | NM_173544                        | 0.268   | 2.17  | 0.0323 | 1.00 |
| merck2-AF023476_s_at         | <b>ADAM12</b>       | NM_003474                        | -0.126  | -2.17 | 0.0324 | 1.00 |
| merck2-AW134779_at           | ---                 | AC004009                         | -0.0980 | -2.17 | 0.0325 | 1.00 |
| merck2-NM_015463_at          | <b>CNRIP1</b>       | NM_015463                        | -0.171  | -2.17 | 0.0325 | 1.00 |
| merck2-BC043286_at           | ---                 | ---                              | -0.0934 | -2.17 | 0.0325 | 1.00 |
| merck2-ENST00000302464_a_at  | <b>UBE2L3</b>       | NM_003347 NR_028436 NR_028437    | -0.0985 | -2.17 | 0.0325 | 1.00 |
| merck2-NM_002120_at          | <b>HLA-DOB</b>      | NM_002120                        | 0.329   | 2.17  | 0.0325 | 1.00 |
| merck2-BG222187_x_at         | <b>HSPA6</b>        | AB034951                         | 0.138   | 2.17  | 0.0326 | 1.00 |
| merck2-BC047864_a_at         | <b>APOL6</b>        | NM_030641                        | -0.219  | -2.17 | 0.0326 | 1.00 |
| merck2-AL157459_at           | <b>CBX2</b>         | AL157459                         | -0.171  | -2.17 | 0.0326 | 1.00 |
| merck2-BC045769_at           | <b>LOC339192</b>    | BC045769                         | -0.246  | -2.17 | 0.0326 | 1.00 |
| merck2-AF035036_x_at         | ---                 | ---                              | 0.271   | 2.17  | 0.0327 | 1.00 |
| merck2-BC033795_s_at         | ---                 | ---                              | 0.159   | 2.17  | 0.0327 | 1.00 |
| merck2-NM_194277_at          | <b>FRMD7</b>        | NM_194277                        | -0.128  | -2.17 | 0.0327 | 1.00 |
| merck2-Rota_P_s9_at          | ---                 | ---                              | -0.0871 | -2.17 | 0.0327 | 1.00 |
| merck2-AJ845164_s_at         | <b>LOC100507616</b> | XR_110328 XR_111328 XR_114669    | 0.209   | 2.17  | 0.0327 | 1.00 |
| merck2-ENST00000390351_x_at  | ---                 | AF316870                         | 0.364   | 2.17  | 0.0327 | 1.00 |
| merck2-NM_173562_a_at        | <b>KCTD20</b>       | NM_173562                        | -0.160  | -2.17 | 0.0328 | 1.00 |
| merck2-NM_001001802_s_at     | ---                 | ---                              | 0.245   | 2.17  | 0.0328 | 1.00 |
| merck2-XM_091890_at          | <b>ZNF320</b>       | NM_207333                        | 0.265   | 2.17  | 0.0328 | 1.00 |
| merck2-XM_932886_at          | ---                 | ---                              | -0.134  | -2.17 | 0.0328 | 1.00 |
| merck2-U52682_at             | <b>IRF4</b>         | NM_002460 NM_001195286 NR_03658  | 0.170   | 2.17  | 0.0329 | 1.00 |
| merck2-NM_019063_at          | <b>EML4</b>         | NM_019063 NM_001145076           | 0.151   | 2.17  | 0.0329 | 1.00 |
| merck2-NM_030920_at          | <b>ANP32E</b>       | NM_030920 NM_001136478 NM_00113  | 0.202   | 2.17  | 0.0329 | 1.00 |
| merck2-AL570146_s_at         | ---                 | ---                              | 0.180   | 2.17  | 0.0329 | 1.00 |
| merck2-NM_024613_at          | <b>PLEKHF2</b>      | NM_024613                        | 0.285   | 2.17  | 0.0329 | 1.00 |
| merck2-NM_199189_a_at        | <b>MATR3</b>        | NM_199189 NM_018834 NM_0011949E  | 0.152   | 2.16  | 0.0330 | 1.00 |
| merck2-AK093871_at           | ---                 | AK093871                         | -0.181  | -2.16 | 0.0330 | 1.00 |
| merck2-AI126618_at           | <b>KHDRBS1</b>      | NM_006559                        | 0.109   | 2.16  | 0.0330 | 1.00 |
| merck2-BM687995_at           | ---                 | ---                              | -0.129  | -2.16 | 0.0330 | 1.00 |
| merck2-BU959629_at           | ---                 | ---                              | -0.115  | -2.16 | 0.0330 | 1.00 |
| merck2-htCT2293782_at        | ---                 | AC013437                         | -0.243  | -2.16 | 0.0330 | 1.00 |

|                            |                            |                                 |         |       |        |      |
|----------------------------|----------------------------|---------------------------------|---------|-------|--------|------|
| merck2-NM_030928_at        | CDT1                       | NM_030928                       | -0.141  | -2.16 | 0.0331 | 1.00 |
| merck2-AV710073_at         | ---                        | ---                             | -0.115  | -2.16 | 0.0331 | 1.00 |
| merck2-BI552493_a_at       | SCG3                       | NM_013243 NM_001165257          | -0.129  | -2.16 | 0.0331 | 1.00 |
| merck-NM_002675_at         | PMIL                       | NM_033249 NM_002675 NM_033246   | -0.208  | -2.16 | 0.0331 | 1.00 |
| merck-AL049349_at          | ---                        | AL049349                        | -0.148  | -2.16 | 0.0331 | 1.00 |
| merck-BQ959720_at          | EIF1AX                     | AL832930                        | 0.201   | 2.16  | 0.0331 | 1.00 |
| merck-CR936744_at          | ---                        | XR_110598 XR_111540 XR_114879   | 0.174   | 2.16  | 0.0331 | 1.00 |
| merck-XM_936048_at         | ---                        | NG_006083                       | 0.195   | 2.16  | 0.0332 | 1.00 |
| merck-BC040587_at          | LSAMP-AS4                  | XR_108471 XR_112529 XR_113582   | -0.107  | -2.16 | 0.0332 | 1.00 |
| merck-NM_032561_at         | CD2HF23                    | NM_032561                       | 0.125   | 2.16  | 0.0332 | 1.00 |
| merck-NM_004677_s_at       | XKRY XKRY2                 | NM_004677 NM_001002906          | -0.202  | -2.16 | 0.0332 | 1.00 |
| merck2-BX475081_at         | ---                        | CR933606                        | 0.251   | 2.16  | 0.0333 | 1.00 |
| merck2-BX649160_a_at       | BCLAF1                     | NM_014739 NM_001077440 NM_00107 | 0.205   | 2.16  | 0.0333 | 1.00 |
| merck2-NM_004662_a_at      | PSIP1                      | NM_033222 NM_001128217          | 0.271   | 2.16  | 0.0333 | 1.00 |
| merck-BX647225_at          | TLK2                       | NM_006852 NM_001112707          | -0.103  | -2.16 | 0.0333 | 1.00 |
| merck2-BC029540_s_at       | ---                        | ---                             | 0.511   | 2.16  | 0.0334 | 1.00 |
| merck-NM_003287_at         | TPD52L1                    | NM_003287 NM_001003395 NM_00100 | 0.140   | 2.16  | 0.0334 | 1.00 |
| merck-NM_001822_s_at       | CHN1                       | NM_001822 NM_001025201          | 0.234   | 2.16  | 0.0334 | 1.00 |
| merck-BC036382_at          | SLC35G1                    | BC047102                        | 0.169   | 2.16  | 0.0334 | 1.00 |
| merck-R85439_at            | ---                        | ---                             | -0.145  | -2.16 | 0.0334 | 1.00 |
| merck2-HSV1_ORF_UL24_at    | ---                        | ---                             | -0.149  | -2.16 | 0.0334 | 1.00 |
| merck-NM_173078_at         | SLITRK4                    | NM_001184749 NM_173078 NM_00118 | 0.260   | 2.16  | 0.0334 | 1.00 |
| merck-BC038745_at          | ---                        | XR_109649 XR_112123 XR_115346   | 0.151   | 2.16  | 0.0335 | 1.00 |
| merck-BC036240_a_at        | SEPT6                      | NM_145799 NM_015129             | 0.118   | 2.16  | 0.0335 | 1.00 |
| merck2-NM_001036646_a_at   | HHLA3                      | NM_001031693 NM_001036645 NM_00 | 0.153   | 2.16  | 0.0335 | 1.00 |
| merck2-BI754652_at         | SLC25A4                    | NM_001151                       | 0.153   | 2.16  | 0.0335 | 1.00 |
| merck-BC036343_at          | COL4A4                     | NM_000092                       | 0.264   | 2.16  | 0.0336 | 1.00 |
| merck-ENST00000374750_s_at | SLB1L3                     | NM_001080407                    | -0.136  | -2.16 | 0.0336 | 1.00 |
| merck-BC022040_at          | ---                        | ---                             | 0.241   | 2.16  | 0.0336 | 1.00 |
| merck-NM_024684_at         | C11orf67                   | NM_024684                       | -0.177  | -2.16 | 0.0336 | 1.00 |
| merck-DB308208_at          | ---                        | AC005748                        | 0.274   | 2.16  | 0.0336 | 1.00 |
| merck-NM_005660_at         | SLC35A2                    | NM_005660                       | -0.218  | -2.16 | 0.0336 | 1.00 |
| merck2-HCT11650182_1_at    | ---                        | BC069413                        | 0.146   | 2.16  | 0.0337 | 1.00 |
| merck-AK057576_at          | ---                        | AK057576                        | -0.186  | -2.16 | 0.0337 | 1.00 |
| merck-ENST00000367962_a_at | FCGR2B                     | NM_004001 NM_001002273 NM_00100 | 0.314   | 2.16  | 0.0337 | 1.00 |
| merck2-CR936789_at         | FSD1L                      | CR936789                        | 0.163   | 2.16  | 0.0337 | 1.00 |
| merck-NM_003632_at         | CNTNAP1                    | NM_003632                       | 0.180   | 2.16  | 0.0337 | 1.00 |
| merck2-BG230607_at         | PSAP                       | NM_002778 NM_001042465 NM_00104 | -0.0654 | -2.16 | 0.0337 | 1.00 |
| merck-BU685426_at          | MUC20                      | NM_152673 NM_001098516          | 0.144   | 2.16  | 0.0337 | 1.00 |
| merck-DB443631_at          | ---                        | ---                             | 0.127   | 2.15  | 0.0338 | 1.00 |
| merck-NM_004568_s_at       | SERPINB6                   | NM_004568 NM_001195291          | -0.160  | -2.15 | 0.0338 | 1.00 |
| merck-NM_018304_s_at       | PRR11                      | NM_018304                       | -0.147  | -2.15 | 0.0338 | 1.00 |
| merck-NM_144633_at         | KCNH8                      | NM_144633                       | 0.327   | 2.15  | 0.0339 | 1.00 |
| merck-BF515552_at          | ---                        | AL158062                        | 0.195   | 2.15  | 0.0339 | 1.00 |
| merck-XM_407859_at         | ---                        | ---                             | -0.123  | -2.15 | 0.0339 | 1.00 |
| merck-AK092172_at          | LOC286109                  | AK092172                        | -0.157  | -2.15 | 0.0339 | 1.00 |
| merck-AK026933_at          | EIF5                       | NM_001969 NM_183004             | 0.144   | 2.15  | 0.0339 | 1.00 |
| merck-ENST00000354314_at   | ---                        | ---                             | -0.128  | -2.15 | 0.0340 | 1.00 |
| merck2-BQ016861_at         | ---                        | AC240516                        | 0.124   | 2.15  | 0.0340 | 1.00 |
| merck2-AI051196_a_at       | LRP1                       | NM_002332                       | -0.249  | -2.15 | 0.0340 | 1.00 |
| merck-BQ774745_at          | ---                        | ---                             | -0.169  | -2.15 | 0.0340 | 1.00 |
| merck2-BC112087_at         | KCNE2                      | NM_172201                       | 0.157   | 2.15  | 0.0340 | 1.00 |
| merck2-NM_152336_at        | AGBL1                      | NM_152336                       | -0.121  | -2.15 | 0.0340 | 1.00 |
| merck2-AB064041_x_at       | ---                        | ---                             | 0.138   | 2.15  | 0.0340 | 1.00 |
| merck-NM_052960_at         | RBP7                       | NM_052960                       | -0.214  | -2.15 | 0.0341 | 1.00 |
| merck-NM_001012715_at      | C9orf108                   | AK092588                        | -0.180  | -2.15 | 0.0341 | 1.00 |
| merck-NM_015055_at         | SWAP70                     | NM_015055                       | 0.246   | 2.15  | 0.0341 | 1.00 |
| merck-NM_006626_at         | ZBTB6                      | NM_006626                       | 0.150   | 2.15  | 0.0341 | 1.00 |
| merck-AW341489_a_at        | AFF2                       | NM_002025 NM_001169122 NM_00116 | -0.109  | -2.15 | 0.0341 | 1.00 |
| merck-NM_005292_at         | GPR18                      | NM_005292 NM_001098200          | 0.175   | 2.15  | 0.0342 | 1.00 |
| merck-NM_153612_a_at       | HS3ST5                     | NM_153612                       | -0.123  | -2.15 | 0.0343 | 1.00 |
| merck2-BF195866_at         | ---                        | ---                             | -0.138  | -2.15 | 0.0343 | 1.00 |
| merck2-AL153864_1_at       | ---                        | AL173980                        | 0.356   | 2.15  | 0.0343 | 1.00 |
| merck-NM_001953_s_at       | TYMP                       | NM_001113755 NM_001953 NM_00111 | -0.211  | -2.15 | 0.0343 | 1.00 |
| merck-NM_138450_at         | ARL11                      | NM_138450                       | -0.187  | -2.15 | 0.0344 | 1.00 |
| merck2-NM_152440_at        | C12orf66                   | NM_152440                       | 0.153   | 2.15  | 0.0345 | 1.00 |
| merck-NM_017567_at         | NAGK                       | NM_017567                       | -0.170  | -2.15 | 0.0345 | 1.00 |
| merck-AF520746_a_at        | SDC4P                      | NR_001580                       | -0.136  | -2.15 | 0.0345 | 1.00 |
| merck-BI091220_a_at        | GM2A                       | NM_000405                       | 0.191   | 2.15  | 0.0345 | 1.00 |
| merck2-M27539_x_at         | HLLA-LOC100507703          | NM_002116 XM_003119226 XM_00311 | -0.0725 | -2.15 | 0.0345 | 1.00 |
| merck-NM_020448_s_at       | NIPAL3                     | NM_020448                       | 0.125   | 2.15  | 0.0345 | 1.00 |
| merck2-AB209563_at         | SERPINB6                   | NM_004568 NM_001195291          | -0.173  | -2.15 | 0.0346 | 1.00 |
| merck-NM_001005373_at      | LRSAM1                     | NM_138361 NM_001005373 NM_00100 | -0.134  | -2.15 | 0.0346 | 1.00 |
| merck2-U59114_s_at         | ---                        | ---                             | 0.195   | 2.15  | 0.0346 | 1.00 |
| merck-AL711312_at          | ---                        | AC123786                        | -0.135  | -2.15 | 0.0346 | 1.00 |
| merck-HCT1834893_1_at      | ---                        | NG_009747                       | -0.125  | -2.14 | 0.0346 | 1.00 |
| merck-NM_021049_at         | MAGEA5                     | NM_021049                       | 0.191   | 2.14  | 0.0346 | 1.00 |
| merck-ENST00000336387_a_at | Cxorf41                    | NM_001169154 NM_173494          | 0.227   | 2.14  | 0.0346 | 1.00 |
| merck2-BC002665_at         | PLP1                       | NM_000533 NM_199478 NM_00112883 | 0.317   | 2.14  | 0.0346 | 1.00 |
| merck-NM_175068_at         | KRT173                     | NM_175068                       | -0.278  | -2.14 | 0.0346 | 1.00 |
| merck-ENST000003076124_at  | GPDP1                      | NM_182559 NM_001165993          | 0.186   | 2.14  | 0.0347 | 1.00 |
| merck-AL049270_at          | SLC5A12                    | NM_178498                       | -0.0953 | -2.14 | 0.0347 | 1.00 |
| merck-AK091442_at          | ---                        | AK091442                        | 0.124   | 2.14  | 0.0347 | 1.00 |
| merck-BU68698_s_at         | ---                        | ---                             | -0.129  | -2.14 | 0.0347 | 1.00 |
| merck2-AL832977_s_at       | ---                        | ---                             | 0.224   | 2.14  | 0.0347 | 1.00 |
| merck-CR601230_a_at        | CVBB                       | NM_000397                       | -0.143  | -2.14 | 0.0347 | 1.00 |
| merck2-AK096706_at         | EBF1                       | NM_024007                       | 0.230   | 2.14  | 0.0348 | 1.00 |
| merck-AW207203_at          | ---                        | AL160398                        | 0.145   | 2.14  | 0.0348 | 1.00 |
| merck-AK055524_at          | ---                        | AK055524                        | -0.133  | -2.14 | 0.0348 | 1.00 |
| merck-NM_152456_at         | IL34                       | NM_152456 NM_001172771 NM_00117 | -0.100  | -2.14 | 0.0349 | 1.00 |
| merck-AK090920_at          | LOC100130373               | AK090920                        | -0.193  | -2.14 | 0.0349 | 1.00 |
| merck-XM_937466_at         | ---                        | ---                             | 0.155   | 2.14  | 0.0349 | 1.00 |
| merck2-BC016691_at         | RNF20                      | NM_019592                       | -0.208  | -2.14 | 0.0349 | 1.00 |
| merck2-BC018532_at         | FAM129A                    | NM_052966                       | -0.311  | -2.14 | 0.0350 | 1.00 |
| merck2-BE818281_at         | MOXD1                      | NM_015529                       | 0.185   | 2.14  | 0.0350 | 1.00 |
| AFFX-DapX-3_at             | ---                        | ---                             | -0.0811 | -2.14 | 0.0350 | 1.00 |
| merck-XM_210737_at         | ---                        | NG_009950                       | -0.179  | -2.14 | 0.0350 | 1.00 |
| merck2-AA73824_1_at        | LOC100506610               | XR_110929 XR_113300 XR_115503   | 0.186   | 2.14  | 0.0350 | 1.00 |
| merck2-XM_166279_at        | RSPPRY1                    | AL834402                        | 0.125   | 2.14  | 0.0350 | 1.00 |
| merck2-NM_005953_x_at      | MT2A                       | NM_005953                       | -0.226  | -2.14 | 0.0350 | 1.00 |
| merck2-NM_138367_at        | ZNF251                     | NM_138367                       | 0.179   | 2.14  | 0.0351 | 1.00 |
| merck-BM925199_at          | ---                        | ---                             | 0.168   | 2.14  | 0.0351 | 1.00 |
| merck-AY888048_at          | TAF4B                      | NM_005640                       | 0.197   | 2.14  | 0.0351 | 1.00 |
| merck2-NM_024318_at        | LILRA6                     | NM_024318                       | -0.186  | -2.14 | 0.0351 | 1.00 |
| merck-NM_145176_at         | SLC2A12                    | NM_145176                       | 0.215   | 2.14  | 0.0351 | 1.00 |
| merck-AK095773_at          | ---                        | AK095773                        | -0.212  | -2.14 | 0.0352 | 1.00 |
| merck-ENST00000250805_a_at | TTY1 TTTY1B                | NR_001538 NR_003589             | -0.246  | -2.14 | 0.0352 | 1.00 |
| merck-NM_020415_at         | RETN                       | NM_020415 NM_001193374          | -0.236  | -2.14 | 0.0352 | 1.00 |
| merck-NM_199327_s_at       | SPRY1                      | NM_005841 NM_199327             | 0.248   | 2.14  | 0.0352 | 1.00 |
| merck-AK027795_at          | ---                        | AK027795                        | -0.186  | -2.14 | 0.0352 | 1.00 |
| merck2-NM_020827_at        | KIAA1430                   | NM_020827                       | 0.198   | 2.14  | 0.0352 | 1.00 |
| merck2-AY515008_at         | ---                        | AY515008                        | -0.0658 | -2.14 | 0.0353 | 1.00 |
| merck2-AA888002_at         | ARHGEF37                   | NM_001001669                    | -0.138  | -2.14 | 0.0353 | 1.00 |
| merck-BC040672_at          | ---                        | BC040672                        | 0.117   | 2.14  | 0.0353 | 1.00 |
| merck2-BF061740_x_at       | ---                        | BC059952                        | -0.141  | -2.14 | 0.0353 | 1.00 |
| merck-NM_021949_at         | ATP2B3                     | NM_021949 NM_001001344          | 0.126   | 2.14  | 0.0353 | 1.00 |
| merck2-BX111225_s_at       | ANKRD36 ANKRD36B LOC400986 | NM_001184315 NM_025190 XM_00311 | 0.237   | 2.14  | 0.0353 | 1.00 |
| merck-NM_001024455_s_at    | ROG42                      | NM_001024455                    | -0.179  | -2.14 | 0.0354 | 1.00 |
| merck2-BX647215_at         | ---                        | BX647215                        | 0.153   | 2.14  | 0.0354 | 1.00 |
| merck-NM_001987_s_at       | ETV6                       | NM_001987                       | -0.100  | -2.14 | 0.0354 | 1.00 |
| merck-AF269286_at          | ---                        | AF269286                        | 0.159   | 2.13  | 0.0354 | 1.00 |
| merck-NM_002959_at         | SORT1                      | NM_002959                       | -0.188  | -2.13 | 0.0354 | 1.00 |
| merck2-BX410094_a_at       | TPD52                      | NM_001025252 NM_001025253 NM_00 | 0.345   | 2.13  | 0.0354 | 1.00 |
| merck-ENST00000332111_x_at | OR7E37P MGC72080           | NR_002163 NR_002822             | -0.151  | -2.13 | 0.0355 | 1.00 |
| merck2-DQ473380_x_at       | ---                        | ---                             | 0.351   | 2.13  | 0.0355 | 1.00 |
| merck2-NM_001018104_at     | FAHD1                      | NM_001018104 NM_001142398       | 0.129   | 2.13  | 0.0355 | 1.00 |
| merck2-BF434597_at         | RORA                       | NM_134261                       | 0.335   | 2.13  | 0.0355 | 1.00 |
| merck-AI53879_a_at         | TSEN15                     | NM_052695 NM_001127394 NR_02334 | 0.117   | 2.13  | 0.0355 | 1.00 |
| merck2-BG751819_at         | SLC20A2                    | NM_006749                       | -0.138  | -2.13 | 0.0356 | 1.00 |

|                             |                     |                                 |         |       |        |      |
|-----------------------------|---------------------|---------------------------------|---------|-------|--------|------|
| merck-AL832916_at           | ---                 | AL832916                        | 0.520   | 2.13  | 0.0356 | 1.00 |
| merck2-NM_080794_at         | MRPL39              | NM_080794                       | 0.146   | 2.13  | 0.0356 | 1.00 |
| merck2-NM_005332_a_at       | HBZ                 | NM_005332                       | -0.428  | -2.13 | 0.0357 | 1.00 |
| merck-NM_005902_at          | SMAD3               | NM_005902                       | 0.132   | 2.13  | 0.0357 | 1.00 |
| merck-BM547658_at           | ---                 | NM_001145102 NM_00114           | ---     | ---   | ---    | ---  |
| merck-HCT1970787_1_at       | ---                 | ---                             | -0.129  | -2.13 | 0.0357 | 1.00 |
| merck2-BI519527_at          | IKZF1               | NM_006060                       | -0.106  | -2.13 | 0.0358 | 1.00 |
| merck-NM_001039463_at       | NEFXN-AS1           | NR_110470 XR_112069 XR_113334   | 0.0933  | 2.13  | 0.0358 | 1.00 |
| merck2-UI6261_at            | IL24                | NM_006850 NM_001185156 NM_00118 | -0.127  | -2.13 | 0.0358 | 1.00 |
| merck-AK065172_a_at         | DLG5                | NM_004747                       | 0.179   | 2.13  | 0.0358 | 1.00 |
| merck-AL512683_s_at         | SCRT1               | NM_031309                       | -0.173  | -2.13 | 0.0358 | 1.00 |
| merck-NM_020799_s_at        | STAMBPL1            | NM_020799                       | -0.0851 | -2.13 | 0.0358 | 1.00 |
| merck-NM_032211_at          | LOXL4               | NM_032211                       | 0.193   | 2.13  | 0.0359 | 1.00 |
| merck2-BF511680_at          | AMOTL1              | NM_130847                       | -0.144  | -2.13 | 0.0359 | 1.00 |
| merck2-CA447086_at          | VPS4B               | NM_094869                       | 0.130   | 2.13  | 0.0359 | 1.00 |
| merck-NM_006805_at          | HNRNPA0             | NM_006805                       | 0.153   | 2.13  | 0.0359 | 1.00 |
| merck-AK055284_s_at         | ---                 | AK055284                        | 0.142   | 2.13  | 0.0359 | 1.00 |
| merck2-ENST00000298824_x_at | ARHGAP42            | NM_152432                       | -0.114  | -2.13 | 0.0360 | 1.00 |
| merck-R06493_x_at           | ---                 | ---                             | 0.123   | 2.13  | 0.0360 | 1.00 |
| merck-ENST0000268533_at     | NUDT7               | NM_001105663                    | 0.0947  | 2.13  | 0.0360 | 1.00 |
| merck-NM_018334_at          | LRRN3               | NM_001099660 NM_001099658 NM_01 | 0.165   | 2.13  | 0.0360 | 1.00 |
| merck-AI829279_s_at         | ---                 | AK090408                        | 0.440   | 2.13  | 0.0360 | 1.00 |
| merck-AK002120_a_at         | DCX                 | NM_000555 NM_178152 NM_178153 N | 0.125   | 2.13  | 0.0360 | 1.00 |
| merck2-BC009795_a_at        | TNFSF10             | NM_003810 NM_001190942 NR_03399 | 0.481   | 2.13  | 0.0361 | 1.00 |
| merck-NM_005582_at          | CD180               | NM_005582                       | -0.130  | -2.13 | 0.0361 | 1.00 |
| merck-BC008467_at           | LOC158960           | BC008467                        | 0.233   | 2.13  | 0.0361 | 1.00 |
| merck-NM_001903_at          | EGF                 | NM_001963 NM_001178130 NM_00117 | -0.137  | -2.13 | 0.0361 | 1.00 |
| merck2-DA63754_a_at         | CTNNA1              | NM_001903                       | -0.281  | -2.13 | 0.0361 | 1.00 |
| merck2-T64550_a_at          | KHDRBS1             | NM_006559                       | -0.141  | -2.13 | 0.0361 | 1.00 |
| merck-NM_032121_s_at        | MAGT1               | NM_032121                       | 0.106   | 2.13  | 0.0362 | 1.00 |
| merck-NM_005036_at          | PPARA               | NM_001001928 NM_005036          | 0.166   | 2.13  | 0.0362 | 1.00 |
| merck-NM_014728_s_at        | FRMPD4              | NM_014728                       | -0.204  | -2.13 | 0.0362 | 1.00 |
| merck-AK058833_a_at         | TRIM14              | NM_014728                       | 0.151   | 2.13  | 0.0362 | 1.00 |
| merck2-CD653323_at          | IGF1R               | NM_000875                       | -0.169  | -2.13 | 0.0362 | 1.00 |
| merck2-HSV2_ORF_US11_s_at   | ---                 | ---                             | -0.131  | -2.12 | 0.0363 | 1.00 |
| merck-XM_937660_at          | ---                 | ---                             | -0.156  | -2.12 | 0.0363 | 1.00 |
| merck-ENST00000265121_at    | ODZ3                | NM_001080477                    | -0.121  | -2.12 | 0.0363 | 1.00 |
| merck-NM_173570_s_at        | ZDHHC23             | NM_173570                       | 0.149   | 2.12  | 0.0364 | 1.00 |
| merck-ENST00000276770_s_at  | TTYT7 TTYT7B        | NR_001534 NR_003592             | 0.251   | 2.12  | 0.0364 | 1.00 |
| merck2-BX649155_a_at        | PSP1                | NM_033222 NM_001128217          | -0.141  | -2.12 | 0.0364 | 1.00 |
| merck-NM_002862_at          | PYGB                | NM_002862                       | 0.249   | 2.12  | 0.0364 | 1.00 |
| merck2-BU602759_at          | FLJ39051            | NR_033839                       | -0.176  | -2.12 | 0.0364 | 1.00 |
| merck2-BG744509_at          | ---                 | ---                             | -0.243  | -2.12 | 0.0365 | 1.00 |
| merck-CR744388_at           | ---                 | ---                             | 0.0986  | 2.12  | 0.0365 | 1.00 |
| merck-NM_004060_at          | CCNG1               | NM_004060 NM_199246             | -0.103  | -2.12 | 0.0365 | 1.00 |
| merck-AY190101_at           | ---                 | AY190101                        | 0.190   | 2.12  | 0.0366 | 1.00 |
| merck2-CR590554_at          | ---                 | CR594785                        | 0.111   | 2.12  | 0.0366 | 1.00 |
| merck-AK023738_at           | CEP63               | NM_001042384                    | 0.246   | 2.12  | 0.0366 | 1.00 |
| merck-AK123300_at           | ---                 | AK123300                        | -0.132  | -2.12 | 0.0366 | 1.00 |
| merck-NM_152904_s_at        | SPECC1              | NM_001033554 NM_001033555 NM_1f | -0.145  | -2.12 | 0.0366 | 1.00 |
| merck-NM_007030_at          | TPPP                | NM_007030                       | -0.158  | -2.12 | 0.0367 | 1.00 |
| merck2-NM_002332_at         | LRP1                | NM_002332                       | -0.109  | -2.12 | 0.0367 | 1.00 |
| merck-NM_005375_at          | MYB                 | NM_001130173 NM_005375 NM_00113 | -0.238  | -2.12 | 0.0367 | 1.00 |
| merck2-NM_152585_s_at       | ---                 | ---                             | -0.155  | -2.12 | 0.0367 | 1.00 |
| merck-XM_936332_x_at        | ---                 | U07977                          | -0.100  | -2.12 | 0.0367 | 1.00 |
| merck2-BI666677_at          | ---                 | ---                             | 0.190   | 2.12  | 0.0368 | 1.00 |
| merck-ENST00000369488_X_at  | ---                 | ---                             | -0.276  | -2.12 | 0.0368 | 1.00 |
| merck2-D45917_a_at          | TIMP3               | NM_003662                       | 0.359   | 2.12  | 0.0368 | 1.00 |
| merck-ENST00000271011_a_at  | SERBP1              | NM_001018067 NM_001018068 NM_0f | -0.128  | -2.12 | 0.0368 | 1.00 |
| merck-XM_067107_a_at        | ---                 | ---                             | 0.129   | 2.12  | 0.0368 | 1.00 |
| merck-ENST00000355100_a_at  | ABHD2               | NM_007011 NM_152924             | -0.135  | -2.12 | 0.0368 | 1.00 |
| merck-AL535164_a_at         | RING1               | NM_002931                       | -0.169  | -2.12 | 0.0368 | 1.00 |
| merck2-BC007782_at          | IGLC1               | BC007782                        | -0.133  | -2.12 | 0.0369 | 1.00 |
| merck-XM_937489_at          | ---                 | ---                             | 0.335   | 2.12  | 0.0369 | 1.00 |
| merck-AF150307_at           | ---                 | ---                             | -0.153  | -2.12 | 0.0369 | 1.00 |
| merck-ENST00000371556_s_at  | HSP90AB1 HSP90AB3P  | NM_007355 NR_036694             | -0.171  | -2.12 | 0.0369 | 1.00 |
| merck-AV648465_at           | ---                 | ---                             | 0.143   | 2.12  | 0.0369 | 1.00 |
| merck-NM_153834_at          | GPR112              | NM_153834                       | -0.120  | -2.12 | 0.0369 | 1.00 |
| merck2-BF782881_at          | ---                 | ---                             | 0.338   | 2.12  | 0.0370 | 1.00 |
| merck-AK057759_at           | ---                 | AK057759                        | -0.103  | -2.12 | 0.0370 | 1.00 |
| merck2-DB567116_at          | TMEM35              | NM_021637                       | 0.175   | 2.12  | 0.0370 | 1.00 |
| merck-NM_014632_s_at        | MICAL2              | NM_014632                       | 0.0975  | 2.12  | 0.0370 | 1.00 |
| merck-AW208100_a_at         | SNAP23              | NM_003825 NM_130798             | -0.290  | -2.12 | 0.0370 | 1.00 |
| merck-NM_007156_s_at        | ZXDA ZXDB           | NM_007156 NM_007157             | -0.146  | -2.12 | 0.0370 | 1.00 |
| merck-NM_025080_a_at        | ASRGL1              | NM_001083926 NM_025080          | 0.169   | 2.12  | 0.0370 | 1.00 |
| merck2-BQ614044_at          | ---                 | ---                             | -0.224  | -2.12 | 0.0371 | 1.00 |
| merck-BC056887_a_at         | FAM13B              | NM_016603 NM_001101800 NM_00110 | -0.114  | -2.12 | 0.0371 | 1.00 |
| merck-NM_007249_at          | KLF12               | NM_007249                       | 0.0940  | 2.12  | 0.0371 | 1.00 |
| merck2-NM_020780_at         | PTCHD2              | NM_020780                       | 0.189   | 2.12  | 0.0371 | 1.00 |
| merck2-BU430449_a_at        | FYTTD1              | NM_032288 NM_001011537 NR_02784 | -0.120  | -2.12 | 0.0371 | 1.00 |
| merck2-BE272644_a_at        | ---                 | ---                             | -0.123  | -2.12 | 0.0371 | 1.00 |
| merck-NM_003440_at          | ZNF140              | NM_003440                       | 0.131   | 2.11  | 0.0371 | 1.00 |
| merck-H75698_at             | ---                 | NG_007095                       | 0.197   | 2.11  | 0.0372 | 1.00 |
| merck-NM_007105_at          | SLC22A18AS          | NM_007105                       | -0.143  | -2.11 | 0.0372 | 1.00 |
| merck-HCT1782279_at         | ---                 | ---                             | -0.180  | -2.11 | 0.0372 | 1.00 |
| merck2-ENST00000255741_at   | ONA11               | AF196997                        | 0.186   | 2.11  | 0.0373 | 1.00 |
| merck-NM_001771_at          | CD22                | NM_002067                       | -0.121  | -2.11 | 0.0373 | 1.00 |
| merck-XM_926941_s_at        | ---                 | NM_001771 NM_001185099 NM_00118 | 0.298   | 2.11  | 0.0373 | 1.00 |
| merck-NM_207467_at          | C1orf220            | NR_033186                       | 0.224   | 2.11  | 0.0373 | 1.00 |
| merck-AK024851_at           | ---                 | AK024851                        | 0.152   | 2.11  | 0.0374 | 1.00 |
| merck-AK091308_at           | ---                 | AK091308                        | -0.217  | -2.11 | 0.0374 | 1.00 |
| merck-NM_152426_at          | ---                 | ---                             | 0.152   | 2.11  | 0.0374 | 1.00 |
| merck2-HCT1832253_1_at      | MID2                | NM_012216 NM_052817             | -0.111  | -2.11 | 0.0374 | 1.00 |
| merck2-AI862445_at          | TNFAIP2             | AL391419                        | 0.151   | 2.11  | 0.0374 | 1.00 |
| merck-NM_058182_at          | FAM165B             | NM_006291                       | 0.257   | 2.11  | 0.0375 | 1.00 |
| merck2-BE551097_at          | ---                 | AY081143                        | -0.187  | -2.11 | 0.0375 | 1.00 |
| merck-BF876969_at           | ---                 | ---                             | 0.142   | 2.11  | 0.0375 | 1.00 |
| merck-NM_002163_at          | IRF8                | NM_002163                       | 0.213   | 2.11  | 0.0375 | 1.00 |
| merck-NM_014639_a_at        | TTC37               | NM_014639                       | -0.232  | -2.11 | 0.0375 | 1.00 |
| merck-AF015041_a_at         | NUMBL               | NM_004756                       | 0.153   | 2.11  | 0.0375 | 1.00 |
| merck-AB037837_a_at         | CHD7                | NM_017780                       | 0.197   | 2.11  | 0.0376 | 1.00 |
| merck-BC047305_a_at         | COL4A1              | NM_001845                       | -0.164  | -2.11 | 0.0376 | 1.00 |
| merck-XM_487647_at          | ---                 | ---                             | -0.168  | -2.11 | 0.0376 | 1.00 |
| merck2-BQ013763_at          | NBLA00301           | EU000854                        | -0.103  | -2.11 | 0.0376 | 1.00 |
| merck-AK022257_at           | ---                 | AK022257                        | -0.155  | -2.11 | 0.0376 | 1.00 |
| merck2-NM_000391_at         | TPP1                | NM_000391                       | -0.120  | -2.11 | 0.0376 | 1.00 |
| merck2-AB078432_at          | GCNT2               | NM_145649                       | -0.177  | -2.11 | 0.0376 | 1.00 |
| merck-ENST00000340858_a_at  | ALOX12P2            | NR_002710                       | -0.135  | -2.11 | 0.0376 | 1.00 |
| merck-NM_130469_s_at        | JDP2                | NM_130469 NM_001135047 NM_00113 | -0.156  | -2.11 | 0.0377 | 1.00 |
| merck2-AK091280_at          | FAM49A              | NM_030797                       | 0.123   | 2.11  | 0.0378 | 1.00 |
| merck-NM_015271_at          | TRIM2               | NM_015271 NM_001130067          | -0.176  | -2.11 | 0.0378 | 1.00 |
| merck-NM_001010855_a_at     | PIK3R6              | NM_001010855                    | -0.0931 | -2.11 | 0.0378 | 1.00 |
| merck-NM_001009894_at       | C12orf29            | NM_001009894                    | 0.177   | 2.11  | 0.0378 | 1.00 |
| merck2-NM_018553_at         | C17orf85            | NM_001114118 NM_018553          | -0.176  | -2.11 | 0.0378 | 1.00 |
| merck-AK097999_at           | ---                 | AK097999                        | -0.0908 | -2.11 | 0.0379 | 1.00 |
| merck2-AA077332_x_at        | ATPSJ2 ATP5J2-PTCD1 | NM_004889 NM_001003713 NM_0010f | -0.152  | -2.11 | 0.0379 | 1.00 |
| merck2-NM_207292_at         | MBNL1               | NM_021038 NM_207292 NM_207293 N | -0.174  | -2.11 | 0.0379 | 1.00 |
| merck2-BX648290_at          | ---                 | BX648290                        | 0.156   | 2.11  | 0.0379 | 1.00 |
| merck-AY007155_at           | LOC439949           | NR_036502 NR_036503             | -0.205  | -2.11 | 0.0379 | 1.00 |
| merck-AK097037_at           | ZNF525              | NR_003699                       | 0.200   | 2.11  | 0.0379 | 1.00 |
| merck2-ENST00000370551_s_at | HS2S11              | NM_001134492                    | -0.162  | -2.11 | 0.0380 | 1.00 |
| merck-NM_000137_at          | FAH                 | NM_000137                       | 0.158   | 2.10  | 0.0380 | 1.00 |
| merck-X64982_s_at           | ORA9A1P             | X64982                          | -0.0931 | -2.11 | 0.0378 | 1.00 |
| merck-NM_001211_at          | BUB1B               | NM_001211                       | 0.144   | 2.10  | 0.0381 | 1.00 |
| merck-NM_016220_s_at        | ZNF107              | NM_016220 NM_001013746          | -0.146  | -2.10 | 0.0381 | 1.00 |
| merck-AF036974_x_at         | ---                 | ---                             | 0.395   | 2.10  | 0.0381 | 1.00 |
| merck-NM_003411_a_at        | ZFY                 | NM_003411 NM_001145275 NM_00114 | 0.235   | 2.10  | 0.0381 | 1.00 |
| merck-NM_152407_at          | GRPEL2              | NM_152407                       | -0.592  | -2.10 | 0.0382 | 1.00 |
|                             |                     |                                 | 0.170   | 2.10  | 0.0382 | 1.00 |

|                            |                                 |                                  |         |       |        |      |
|----------------------------|---------------------------------|----------------------------------|---------|-------|--------|------|
| merck-BQ942635_a_at        | RBPJ                            | NM_005349 NM_015874 NM_203283 N  | -0.101  | -2.10 | 0.0382 | 1.00 |
| merck2-AW814840_at         | ---                             | ---                              | 0.0873  | 2.10  | 0.0382 | 1.00 |
| merck-BC023251_s_at        | KIAA1609                        | NM_020947                        | -0.133  | -2.10 | 0.0382 | 1.00 |
| merck-R64384_at            | ---                             | AC019181                         | 0.220   | 2.10  | 0.0383 | 1.00 |
| merck-CR624071_at          | ATF1                            | NM_005171                        | 0.259   | 2.10  | 0.0383 | 1.00 |
| merck2-AK222757_at         | ITIH3                           | NM_002217                        | -0.127  | -2.10 | 0.0383 | 1.00 |
| merck-ENST00000312019_s_at | FLJ32790                        | XR_109256 XR_111642 XR_114919    | -0.188  | -2.10 | 0.0384 | 1.00 |
| merck-ENST00000255531_s_at | PCDH19                          | NM_001105243 NM_020766 NM_00118  | 0.278   | 2.10  | 0.0384 | 1.00 |
| merck-AIC22845_at          | ---                             | ---                              | 0.185   | 2.10  | 0.0384 | 1.00 |
| merck2-BF439126_at         | ---                             | ---                              | -0.101  | -2.10 | 0.0384 | 1.00 |
| merck-DA156101_a_at        | TCERG1                          | NM_006706 NM_001040006           | -0.124  | -2.10 | 0.0385 | 1.00 |
| merck2-CB853209_at         | ---                             | AK124776                         | 0.143   | 2.10  | 0.0385 | 1.00 |
| merck-NM_181337_at         | KAAG1                           | NM_181337                        | -0.106  | -2.10 | 0.0385 | 1.00 |
| merck-CD667039_a_at        | DNAH12                          | NM_178504 NM_198564              | 0.143   | 2.10  | 0.0385 | 1.00 |
| merck-NM_001003408_at      | ABLIM1                          | NM_002313 NM_001003407 NM_0010K  | 0.140   | 2.10  | 0.0386 | 1.00 |
| merck-NM_020370_at         | GP84                            | NM_020370                        | -0.275  | -2.10 | 0.0386 | 1.00 |
| merck-NM_001005168_at      | OR52E8                          | NM_001005168                     | -0.101  | -2.10 | 0.0387 | 1.00 |
| merck-AI218739_at          | ---                             | ---                              | -0.209  | -2.10 | 0.0387 | 1.00 |
| merck-AK023131_at          | XPR1                            | NM_004736 NM_001135669           | -0.242  | -2.10 | 0.0387 | 1.00 |
| merck-NM_021637_at         | TMEM35                          | NM_021637                        | 0.141   | 2.10  | 0.0387 | 1.00 |
| merck-NM_000039_s_at       | APOA1                           | NM_000039                        | -0.122  | -2.10 | 0.0387 | 1.00 |
| merck2-NM_000677_at        | ADORA3                          | NM_000677                        | -0.323  | -2.10 | 0.0387 | 1.00 |
| merck-AK056597_s_at        | OTUD4                           | NM_001102653                     | -0.161  | -2.10 | 0.0388 | 1.00 |
| merck2-D79886_at           | BCLAF1                          | NM_014739 NM_001077440 NM_00101  | 0.156   | 2.10  | 0.0388 | 1.00 |
| merck-BF028446_a_at        | PEG10                           | NM_001040152 NM_001184961 NM_0C  | 0.199   | 2.10  | 0.0389 | 1.00 |
| merck-BC012184_s_at        | SNX27                           | NM_030918                        | -0.133  | -2.10 | 0.0389 | 1.00 |
| merck-NM_021049_at         | MAGEA5                          | NM_021049                        | 0.322   | 2.09  | 0.0389 | 1.00 |
| merck-AK054953_at          | LOC200830                       | AK054953                         | -0.133  | -2.09 | 0.0389 | 1.00 |
| merck-NM_006820_at         | IFI44L                          | NM_006820                        | -0.547  | -2.09 | 0.0390 | 1.00 |
| merck-NM_173571_s_at       | CT47A1 CT47A10 CT47A11 CT47A2 C | NM_001080146 NM_001080137 NM_11  | 0.465   | 2.09  | 0.0390 | 1.00 |
| merck-BC040270_at          | ---                             | BC040270                         | 0.121   | 2.09  | 0.0390 | 1.00 |
| merck-AF088050_x_at        | ---                             | AF088050                         | -0.182  | -2.09 | 0.0391 | 1.00 |
| merck-BX640620_x_at        | ---                             | ---                              | 0.286   | 2.09  | 0.0392 | 1.00 |
| merck-XM_063329_at         | ---                             | ---                              | -0.103  | -2.09 | 0.0392 | 1.00 |
| merck2-NM_001001668_at     | ZNF470                          | NM_001001668                     | 0.172   | 2.09  | 0.0392 | 1.00 |
| merck2-BC022485_at         | GNG4                            | NM_001098722 NM_001098721 NM_0C  | -0.131  | -2.09 | 0.0392 | 1.00 |
| merck2-BQ775674_s_at       | ---                             | ---                              | 0.143   | 2.09  | 0.0392 | 1.00 |
| merck-T92393_s_at          | CRCP                            | NM_014478 NM_001040647 NM_0010K  | -0.136  | -2.09 | 0.0393 | 1.00 |
| merck-NM_001040647_at      | TMED6                           | NM_144676                        | -0.221  | -2.09 | 0.0394 | 1.00 |
| merck-NM_144676_at         | ---                             | ---                              | -0.313  | -2.09 | 0.0394 | 1.00 |
| merck-U51706_at            | ---                             | ---                              | 0.101   | 2.09  | 0.0394 | 1.00 |
| merck2-AA576624_at         | TMEM66                          | NM_016127                        | 0.149   | 2.09  | 0.0394 | 1.00 |
| merck2-BU175285_s_at       | PTGES3                          | NM_006601                        | 0.134   | 2.09  | 0.0394 | 1.00 |
| merck2-NM_030908_s_at      | ---                             | ---                              | 0.147   | 2.09  | 0.0394 | 1.00 |
| merck2-BM689527_at         | CDC91                           | NM_018318                        | 0.185   | 2.09  | 0.0394 | 1.00 |
| merck-AK093152_s_at        | ---                             | ---                              | 0.236   | 2.09  | 0.0395 | 1.00 |
| merck-BC034812_at          | DLEU2                           | XR_110131 XR_111394 XR_114702    | -0.145  | -2.09 | 0.0395 | 1.00 |
| merck-AF380424_at          | IFI16                           | NM_005531                        | -0.140  | -2.09 | 0.0395 | 1.00 |
| merck-AF086545_a_at        | ---                             | ---                              | -0.137  | -2.09 | 0.0396 | 1.00 |
| merck-G38642_at            | OASL                            | NM_003733 NM_198213              | -0.354  | -2.09 | 0.0396 | 1.00 |
| merck-NM_198213_at         | LOC100507330                    | XR_110379 XR_111304 XR_114660    | -0.130  | -2.09 | 0.0396 | 1.00 |
| merck-BC031864_at          | KDMSD                           | BX648643                         | -0.509  | -2.09 | 0.0396 | 1.00 |
| merck2-BX648643_at         | ---                             | ---                              | -0.0746 | -2.09 | 0.0396 | 1.00 |
| merck-HCT1830086_at        | ---                             | ---                              | -0.209  | -2.09 | 0.0396 | 1.00 |
| merck2-NM_001098845_s_at   | ---                             | ---                              | 0.132   | 2.09  | 0.0397 | 1.00 |
| merck-BF373267_at          | LARP4B                          | NM_015155                        | -0.145  | -2.09 | 0.0397 | 1.00 |
| merck-DB088616_s_at        | ---                             | ---                              | -0.232  | -2.09 | 0.0397 | 1.00 |
| merck-CA445255_at          | CWC22                           | NM_020943                        | 0.172   | 2.09  | 0.0397 | 1.00 |
| merck2-BC093952_at         | BAK1                            | NM_001188                        | -0.181  | -2.09 | 0.0398 | 1.00 |
| merck-BM675973_a_at        | ---                             | L42806                           | 0.170   | 2.08  | 0.0398 | 1.00 |
| merck2-L42806_at           | CLEC7A                          | NM_197947 NM_022570 NM_197948 N  | -0.232  | -2.08 | 0.0398 | 1.00 |
| merck-NM_197954_at         | SLC25A6                         | NM_001636                        | 0.120   | 2.08  | 0.0399 | 1.00 |
| merck-AF091238_x_at        | ---                             | BC008359                         | 0.183   | 2.08  | 0.0399 | 1.00 |
| merck-ENST00000355278_at   | ---                             | ---                              | 0.0755  | 2.08  | 0.0399 | 1.00 |
| merck2-BG291729_at         | ---                             | ---                              | -0.133  | -2.08 | 0.0399 | 1.00 |
| merck2-DA413429_at         | LOC100127891                    | XR_108812 XR_110748 XR_113053 XR | -0.102  | -2.08 | 0.0399 | 1.00 |
| merck2-NM_173041_at        | ICK                             | BC035807                         | 0.128   | 2.08  | 0.0399 | 1.00 |
| merck2-CMV_UL65_at         | ---                             | ---                              | -0.143  | -2.08 | 0.0400 | 1.00 |
| merck-NM_004521_s_at       | KIF5B                           | NM_004521                        | -0.288  | -2.08 | 0.0400 | 1.00 |
| merck-NM_024897_at         | PAQR8                           | NM_024897 NM_198406              | -0.123  | -2.08 | 0.0400 | 1.00 |
| merck-XM_062614_at         | ---                             | BN000483                         | -0.141  | -2.08 | 0.0400 | 1.00 |
| merck2-NM_172108_at        | KCNQ2                           | NM_172107 NM_172106 NM_004518 N  | -0.135  | -2.08 | 0.0401 | 1.00 |
| merck-AK057018_at          | ---                             | AK057018                         | 0.154   | 2.08  | 0.0401 | 1.00 |
| merck-AK024332_at          | ---                             | AK024332                         | -0.0924 | -2.08 | 0.0401 | 1.00 |
| merck2-NM_001079530_at     | ---                             | ---                              | -0.127  | -2.08 | 0.0401 | 1.00 |
| merck2-BM763807_a_at       | EXOSC3                          | NM_016042 NM_001002269           | -0.154  | -2.08 | 0.0401 | 1.00 |
| merck-HCT1970919_at        | ---                             | ---                              | 0.217   | 2.08  | 0.0402 | 1.00 |
| merck-NM_016521_at         | TFDP3                           | NM_016521                        | 0.219   | 2.08  | 0.0402 | 1.00 |
| merck2-AY739713_at         | TXLNG                           | NM_018360 NM_001168683           | -0.142  | -2.08 | 0.0402 | 1.00 |
| merck2-AY743663_at         | CT00r46                         | NM_153810                        | 0.219   | 2.08  | 0.0402 | 1.00 |
| merck2-AA805639_at         | CD72                            | NM_001782                        | -0.136  | -2.08 | 0.0403 | 1.00 |
| merck-AK095512_s_at        | PALLD                           | NM_001166108 NM_016081 NM_00116  | -0.196  | -2.08 | 0.0403 | 1.00 |
| merck-NM_205858_at         | NMB                             | NM_021077 NM_205858              | -0.108  | -2.08 | 0.0403 | 1.00 |
| merck-AA161183_at          | ---                             | ---                              | 0.177   | 2.08  | 0.0403 | 1.00 |
| merck-AF432220_a_at        | PSIP1                           | NM_033222 NM_001128217           | -0.101  | -2.08 | 0.0403 | 1.00 |
| merck2-BD004375_at         | VCAN                            | NM_094385 NM_001126336 NM_00116  | 0.210   | 2.08  | 0.0404 | 1.00 |
| merck2-BC009180_at         | MKKS                            | NM_018848 NM_170784              | 0.121   | 2.08  | 0.0404 | 1.00 |
| merck2-AA806102_at         | TTCC39C                         | NM_001135993 NM_153211           | -0.163  | -2.08 | 0.0404 | 1.00 |
| merck-BF206970_at          | ---                             | ---                              | -0.174  | -2.08 | 0.0404 | 1.00 |
| merck-NM_006979_a_at       | SLC39A7                         | NM_006979 NM_001077516           | -0.0952 | -2.08 | 0.0404 | 1.00 |
| merck-NM_212634_at         | ---                             | ---                              | 0.577   | 2.08  | 0.0405 | 1.00 |
| merck-NM_183233_at         | SLC22A18                        | NM_002555 NM_183233              | -0.203  | -2.08 | 0.0405 | 1.00 |
| merck-ENST00000374949_s_at | HLA-DQA1                        | NM_002122                        | -0.149  | -2.08 | 0.0406 | 1.00 |
| merck-NM_007270_s_at       | FKBP9 FKBP9L                    | NM_007270 NR_027339 NR_027340 N  | -0.115  | -2.08 | 0.0406 | 1.00 |
| merck-CR624203_a_at        | TLE4                            | NM_007005                        | 0.205   | 2.08  | 0.0406 | 1.00 |
| merck-BX648430_s_at        | ---                             | AF130085                         | 0.287   | 2.08  | 0.0407 | 1.00 |
| merck2-AK094618_at         | ZNF529                          | NR_027239                        | -0.0914 | -2.08 | 0.0407 | 1.00 |
| merck-CR680017_at          | ---                             | CR680017                         | 0.178   | 2.08  | 0.0407 | 1.00 |
| merck-AB209420_at          | MLLT4                           | NM_001040000                     | 0.161   | 2.08  | 0.0407 | 1.00 |
| merck-AK024928_at          | ---                             | AK024928                         | -0.295  | -2.08 | 0.0407 | 1.00 |
| merck-AK091285_at          | ---                             | ---                              | 0.187   | 2.07  | 0.0408 | 1.00 |
| merck-NM_001039476_a_at    | NPRL3                           | NM_001077350 NM_001039476        | -0.0885 | -2.07 | 0.0408 | 1.00 |
| merck-N79684_s_at          | LOC100507493                    | XR_110882 XR_113132 XR_114149    | -0.119  | -2.07 | 0.0408 | 1.00 |
| merck-VZV_OKA_ORF66_s_at   | KCNQ1                           | NM_002218 NM_181798              | -0.108  | -2.07 | 0.0409 | 1.00 |
| merck2-BG385872_at         | PPFIA1                          | NM_177423 NM_003626              | 0.144   | 2.07  | 0.0409 | 1.00 |
| merck-AI855831_a_at        | ---                             | ---                              | 0.253   | 2.07  | 0.0409 | 1.00 |
| merck-BU664767_at          | AHR                             | AC087361                         | 0.334   | 2.07  | 0.0409 | 1.00 |
| merck-NM_001621_at         | ---                             | NM_001621                        | 0.174   | 2.07  | 0.0409 | 1.00 |
| merck-H50080_s_at          | ---                             | AL160262                         | 0.140   | 2.07  | 0.0409 | 1.00 |
| merck-BX648371_at          | ---                             | XR_108885 XR_113170 XR_114207    | 0.151   | 2.07  | 0.0409 | 1.00 |
| merck-EB387580_s_at        | ---                             | AK092450                         | 0.125   | 2.07  | 0.0409 | 1.00 |
| merck-NM_002185_a_at       | IL7R                            | NM_002185                        | 0.128   | 2.07  | 0.0409 | 1.00 |
| merck-NM_153201_s_at       | HSPA8                           | NM_006597 NM_153201              | 0.211   | 2.07  | 0.0409 | 1.00 |
| merck-NM_003309_at         | TSPYL1                          | NM_003309                        | -0.150  | -2.07 | 0.0409 | 1.00 |
| merck2-BC040959_at         | ---                             | ---                              | -0.141  | -2.07 | 0.0410 | 1.00 |
| merck-NM_017509_at         | KLK15                           | XR_109767 XR_115520              | -0.189  | -2.07 | 0.0410 | 1.00 |
| merck-C330809_at           | ---                             | NM_138563 NM_138564 NM_017509    | 0.201   | 2.07  | 0.0410 | 1.00 |
| merck-NM_013447_at         | EMR2                            | NM_013447 NM_152916 NM_152917 N  | -0.128  | -2.07 | 0.0410 | 1.00 |
| merck-NM_000788_at         | DCK                             | NM_000788                        | 0.164   | 2.07  | 0.0410 | 1.00 |
| merck-BU531790_at          | ---                             | ---                              | 0.145   | 2.07  | 0.0410 | 1.00 |
| merck-NM_005642_at         | TAF7                            | NM_005642                        | -0.153  | -2.07 | 0.0411 | 1.00 |
| merck2-EB388744_at         | AD33                            | NM_016824 NM_019903 NM_001121    | 0.152   | 2.07  | 0.0411 | 1.00 |
| merck-NM_022719_at         | DGGR14                          | NM_022719                        | 0.0971  | 2.07  | 0.0411 | 1.00 |
| merck-NM_019117_at         | KLHL4                           | NM_019117                        | -0.133  | -2.07 | 0.0411 | 1.00 |
| merck-DB294168_at          | PPP6C                           | NM_001123355 NM_002721 NM_00112  | -0.189  | -2.07 | 0.0412 | 1.00 |
| merck-NM_005393_at         | PLXNB3                          | NM_005393 NM_001163257           | 0.0877  | 2.07  | 0.0412 | 1.00 |
| merck2-BI868895_at         | CMIP                            | NM_198390 NM_030629              | 0.449   | 2.07  | 0.0412 | 1.00 |
| merck-CR626250_s_at        | SHARCE1                         | NM_003079                        | ---     | ---   | ---    | ---  |
| merck-AK128280_at          | IGHD                            | BC063384                         | ---     | ---   | ---    | ---  |

|                             |                            |                                 |         |       |        |      |
|-----------------------------|----------------------------|---------------------------------|---------|-------|--------|------|
| merck-M74777_a_at           | DPP4                       | NM_001935                       | 0.239   | 2.07  | 0.0412 | 1.00 |
| merck-NM_00360_at           | UGT8                       | NM_00128174 NM_003360           | 0.110   | 2.07  | 0.0412 | 1.00 |
| merck-NM_052945_at          | TNFRSF13C                  | NM_052945                       | 0.149   | 2.07  | 0.0412 | 1.00 |
| merck-AY05981_at            | SEPT6                      | NM_145799                       | 0.170   | 2.07  | 0.0413 | 1.00 |
| merck-AF425244_at           | RAET1K                     | NR_024045                       | -0.0828 | -2.07 | 0.0413 | 1.00 |
| merck2-ENST00000367942_at   | ATF6                       | NM_007348                       | -0.166  | -2.07 | 0.0413 | 1.00 |
| merck-NM_014883_a_at        | FAM13A                     | NM_014883 NM_001015045          | 0.268   | 2.07  | 0.0413 | 1.00 |
| merck-NM_016651_at          | DACT1                      | NM_016651 NM_001079520          | 0.416   | 2.07  | 0.0413 | 1.00 |
| merck-ENST00000377964_at    | RECK                       | BC068096                        | -0.184  | -2.07 | 0.0414 | 1.00 |
| merck2-BX648519_at          | ERP44                      | NM_015051                       | 0.122   | 2.07  | 0.0414 | 1.00 |
| merck-XM_929383_at          | ---                        | AC009492                        | -0.117  | -2.07 | 0.0414 | 1.00 |
| merck-ENST00000369655_at    | ---                        | XR_110456 XR_111116 XR_114431   | -0.150  | -2.07 | 0.0414 | 1.00 |
| merck-BF977217_at           | ---                        | ---                             | -0.0993 | -2.07 | 0.0415 | 1.00 |
| merck-NM_001004759_at       | OR51T1                     | NM_001004759                    | -0.122  | -2.07 | 0.0415 | 1.00 |
| merck-BC047780_at           | LOC100329109               | NR_033248                       | -0.157  | -2.07 | 0.0415 | 1.00 |
| merck2-AF062248_at          | ---                        | AF062248                        | -0.117  | -2.07 | 0.0416 | 1.00 |
| merck-NM_030776_at          | ZBP1                       | NM_030776 NM_001160417 NM_00116 | -0.205  | -2.07 | 0.0416 | 1.00 |
| merck-NM_012067_s_at        | AKR7A3                     | NM_012067                       | -0.109  | -2.07 | 0.0416 | 1.00 |
| merck-DA036409_a_at         | CYP2C8                     | NM_000770 NM_001198853 NM_00119 | -0.131  | -2.07 | 0.0416 | 1.00 |
| merck2-BM799863_a_at        | SEL1L3                     | NM_015187                       | 0.188   | 2.07  | 0.0416 | 1.00 |
| merck-XM_938742_at          | ---                        | ---                             | 0.174   | 2.07  | 0.0417 | 1.00 |
| merck-AI129830_s_at         | RPL22                      | NM_000983                       | 0.147   | 2.07  | 0.0417 | 1.00 |
| merck-BC015311_a_at         | KIF9                       | NM_022342 NM_182902 NM_00113487 | -0.119  | -2.07 | 0.0417 | 1.00 |
| merck-NM_152310_at          | ELOVL3                     | NM_152310                       | -0.173  | -2.06 | 0.0417 | 1.00 |
| merck-AK128754_at           | ---                        | AK128754                        | 0.119   | 2.06  | 0.0418 | 1.00 |
| merck-BC060766_at           | SLC2A14                    | AL832448                        | -0.104  | -2.06 | 0.0418 | 1.00 |
| merck-NM_001768_s_at        | SEPT7                      | NM_001768 NM_001011553          | 0.112   | 2.06  | 0.0418 | 1.00 |
| merck-NM_152751_at          | BEND7                      | NM_152751                       | 0.134   | 2.06  | 0.0419 | 1.00 |
| merck2-NM_178153_at         | DCX                        | NM_000555 NM_178152 NM_178153 N | 0.345   | 2.06  | 0.0419 | 1.00 |
| merck-ENST00000361066_a_at  | GSTM3                      | NM_000849 NR_024537             | 0.243   | 2.06  | 0.0419 | 1.00 |
| merck-BQ924201_at           | ---                        | ---                             | -0.119  | -2.06 | 0.0419 | 1.00 |
| merck1-T80060_s_at          | ---                        | NG_009055                       | -0.162  | -2.06 | 0.0420 | 1.00 |
| merck-NM_017681_s_at        | NUPB2CL                    | NM_017681 NR_033676             | 0.291   | 2.06  | 0.0420 | 1.00 |
| merck-NM_021794_at          | ADAM30                     | NM_021794                       | 0.118   | 2.06  | 0.0420 | 1.00 |
| merck2-BU147178_at          | WDR6                       | NM_018031                       | 0.150   | 2.06  | 0.0420 | 1.00 |
| merck-ENST00000288425_at    | BAHCC1                     | NM_001080519                    | -0.160  | -2.06 | 0.0420 | 1.00 |
| merck2-NM_000172_a_at       | GNAT1                      | NM_144499 NM_000172             | -0.0941 | -2.06 | 0.0420 | 1.00 |
| merck-NM_001037335_at       | PRICK2B5                   | NM_001037335 NM_033405          | -0.175  | -2.06 | 0.0420 | 1.00 |
| merck-NM_007139_at          | ZNF92                      | NM_007139 NM_152626             | 0.342   | 2.06  | 0.0420 | 1.00 |
| merck-BC039434_at           | ---                        | BC039434                        | 0.289   | 2.06  | 0.0420 | 1.00 |
| merck2-BE006861_x_at        | ---                        | ---                             | -0.136  | -2.06 | 0.0420 | 1.00 |
| merck-NM_002128_s_at        | HMG81                      | NM_002128                       | 0.187   | 2.06  | 0.0421 | 1.00 |
| merck-NM_014572_a_at        | LATS2                      | NM_014572                       | -0.122  | -2.06 | 0.0421 | 1.00 |
| merck-NM_001004349_a_at     | HLA-L                      | NR_027822                       | 0.133   | 2.06  | 0.0421 | 1.00 |
| merck2-BG385707_at          | VP553                      | NM_001126159                    | -0.167  | -2.06 | 0.0421 | 1.00 |
| merck-NM_001154_at          | ANXA5                      | NM_001154                       | -0.111  | -2.06 | 0.0421 | 1.00 |
| merck-AK025286_at           | ---                        | AK025286                        | -0.176  | -2.06 | 0.0421 | 1.00 |
| merck2-ENST00000304187_x_at | ---                        | ---                             | 0.234   | 2.06  | 0.0421 | 1.00 |
| merck-AK131312_a_at         | RCOR3                      | NM_001136223 NM_001136225 NM_01 | -0.262  | -2.06 | 0.0422 | 1.00 |
| merck-NM_000419_at          | ITGA2B                     | NM_000419                       | -0.445  | -2.06 | 0.0422 | 1.00 |
| merck2-BF979936_s_at        | HEATR8 HEATR8-TC4          | NM_001039464 NR_026782 NR_03764 | -0.143  | -2.06 | 0.0422 | 1.00 |
| merck-NM_0024549_s_at       | TC1N1                      | NM_001082538 NM_001082537 NM_02 | 0.150   | 2.06  | 0.0423 | 1.00 |
| merck-ENST00000372602_s_at  | TMSB15B                    | NM_194324                       | 0.219   | 2.06  | 0.0423 | 1.00 |
| merck2-NM_001098173_a_at    | PRDM7                      | NM_001098173 NM_052996          | -0.141  | -2.06 | 0.0424 | 1.00 |
| merck2-NM_022893_at         | BCL11A                     | NM_022893                       | 0.198   | 2.06  | 0.0424 | 1.00 |
| merck-NM_001039091_at       | PKP52                      | NM_001039091 NM_002785          | 0.222   | 2.06  | 0.0424 | 1.00 |
| merck2-DQ786228_at          | ---                        | DQ786228                        | -0.131  | -2.06 | 0.0425 | 1.00 |
| merck2-BC051268_at          | FUCA2                      | NM_032020                       | -0.168  | -2.06 | 0.0425 | 1.00 |
| merck-NM_001040167_s_at     | LFNG                       | NM_001040167 NM_001166355 NM_0C | -0.104  | -2.06 | 0.0425 | 1.00 |
| merck-NM_018275_s_at        | C7orf43                    | NM_018275                       | -0.173  | -2.06 | 0.0426 | 1.00 |
| merck-NM_001010853_s_at     | PM20D2                     | NM_001010853                    | 0.229   | 2.06  | 0.0426 | 1.00 |
| merck-NM_207005_at          | USF1                       | NM_007122 NM_207005             | -0.229  | -2.06 | 0.0427 | 1.00 |
| merck-BC012447_a_at         | SP110                      | NM_004599 NM_004510 NM_080424 N | -0.119  | -2.06 | 0.0427 | 1.00 |
| merck-NM_005132_at          | REC8                       | NM_005132 NM_001048205          | -0.269  | -2.06 | 0.0427 | 1.00 |
| merck2-AB051826_at          | RHOJ                       | NM_021205                       | -0.160  | -2.05 | 0.0428 | 1.00 |
| merck2-BU603313_at          | BCAS2                      | NM_005872                       | 0.0930  | 2.05  | 0.0428 | 1.00 |
| merck-NM_020417_at          | TBX20                      | NM_001077653 NM_001166220       | 0.114   | 2.05  | 0.0428 | 1.00 |
| merck-BQ957607_a_at         | TNFAIP2                    | NM_006291                       | -0.255  | -2.05 | 0.0428 | 1.00 |
| merck2-HC116407853_at       | ---                        | NG_010517                       | -0.134  | -2.05 | 0.0428 | 1.00 |
| merck-AF103907_a_at         | PC3A                       | NR_015342                       | -0.121  | -2.05 | 0.0428 | 1.00 |
| merck2-BU196243_at          | ---                        | ---                             | -0.116  | -2.05 | 0.0429 | 1.00 |
| merck2-BC127705_at          | TMEM220                    | NM_001004313                    | 0.124   | 2.05  | 0.0429 | 1.00 |
| merck-NM_198989_a_at        | DLEU7                      | AK126830                        | -0.177  | -2.05 | 0.0429 | 1.00 |
| merck2-S67637_x_at          | ---                        | ---                             | 0.348   | 2.05  | 0.0430 | 1.00 |
| merck2-BG536877_at          | S1PR1                      | NM_001400                       | 0.207   | 2.05  | 0.0430 | 1.00 |
| merck-ENST00000325589_at    | RABGAP1L                   | CR627374                        | 0.113   | 2.05  | 0.0430 | 1.00 |
| merck2-NM_205843_at         | NFIC                       | NM_005597 NM_205843             | -0.113  | -2.05 | 0.0430 | 1.00 |
| merck-BG745188_at           | ---                        | ---                             | -0.118  | -2.05 | 0.0430 | 1.00 |
| merck2-DA660473_at          | ANAPC1                     | DO068066                        | -0.155  | -2.05 | 0.0431 | 1.00 |
| merck2-AL832013_at          | ---                        | AL832013                        | 0.117   | 2.05  | 0.0431 | 1.00 |
| merck-XM_929995_at          | ---                        | ---                             | -0.0970 | -2.05 | 0.0431 | 1.00 |
| merck-NM_152578_at          | FMR1NB                     | NM_152578                       | 0.115   | 2.05  | 0.0431 | 1.00 |
| merck2-DQ786327_at          | ---                        | DQ786327                        | 0.209   | 2.05  | 0.0431 | 1.00 |
| merck-CB048235_at           | ---                        | ---                             | 0.133   | 2.05  | 0.0432 | 1.00 |
| merck-ENST00000357931_a_at  | ---                        | ---                             | -0.336  | -2.05 | 0.0432 | 1.00 |
| merck-ENST00000278622_at    | ---                        | AF132199                        | 0.239   | 2.05  | 0.0432 | 1.00 |
| merck-BG716493_a_at         | APLP2                      | NM_001642 NM_001142276 NM_00114 | -0.0736 | -2.05 | 0.0432 | 1.00 |
| merck-AF264622_at           | ---                        | AF264622                        | -0.298  | -2.05 | 0.0432 | 1.00 |
| merck-AK123047_a_at         | NR3C2                      | NM_000901 NM_001166104          | 0.154   | 2.05  | 0.0433 | 1.00 |
| merck-NM_001001888_s_at     | VCX VCX3A VCX3B            | NM_013452 NM_016379 NM_00100188 | -0.0961 | -2.05 | 0.0433 | 1.00 |
| merck-AW976243_at           | BACH2                      | AJ271878                        | 0.204   | 2.05  | 0.0433 | 1.00 |
| merck-AB062477_at           | ---                        | AB062477                        | -0.138  | -2.05 | 0.0433 | 1.00 |
| merck-BC038721_at           | LOC255025                  | NR_015400                       | 0.109   | 2.05  | 0.0434 | 1.00 |
| merck2-NM_004054_at         | C3AR1                      | NM_004054                       | -0.234  | -2.05 | 0.0434 | 1.00 |
| merck2-BX648513_at          | POLA1                      | BX648513                        | 0.479   | 2.05  | 0.0434 | 1.00 |
| merck-NM_018982_s_at        | YIPF1                      | NM_018982 NR_036639 NR_036640   | -0.0915 | -2.05 | 0.0434 | 1.00 |
| merck-NM_016107_at          | ZFR                        | NM_016107                       | 0.162   | 2.05  | 0.0434 | 1.00 |
| merck2-NM_013394_at         | FQF1                       | NM_000800 NM_033136 NM_033137 N | -0.0988 | -2.05 | 0.0434 | 1.00 |
| merck-NM_004529_at          | MLT3                       | NM_004529                       | 0.142   | 2.05  | 0.0434 | 1.00 |
| merck-ENST00000323920_at    | ---                        | NG_000957                       | -0.118  | -2.05 | 0.0435 | 1.00 |
| merck-NM_033150_at          | COL2A1                     | NM_001844 NM_033150             | -0.130  | -2.05 | 0.0435 | 1.00 |
| merck2-AK056080_at          | LOC387647                  | NR_003930                       | -0.130  | -2.05 | 0.0435 | 1.00 |
| merck-NM_001194_at          | HCN2                       | NM_001194                       | -0.132  | -2.05 | 0.0435 | 1.00 |
| merck2-BM468535_at          | ZEB2                       | NM_014795 NM_001171653          | -0.197  | -2.05 | 0.0435 | 1.00 |
| merck-RSE_00000399804_at    | ---                        | NG_025418                       | -0.137  | -2.05 | 0.0436 | 1.00 |
| merck-ENST00000380536_s_at  | GPMBB                      | NM_001001995                    | 0.190   | 2.05  | 0.0436 | 1.00 |
| merck-NM_006706_at          | TCERG1                     | NM_006706 NM_001040006          | 0.156   | 2.05  | 0.0436 | 1.00 |
| merck-BF057089_s_at         | ---                        | AK095264                        | -0.243  | -2.05 | 0.0436 | 1.00 |
| merck2-EC495211_x_at        | ---                        | ---                             | 0.0567  | 2.05  | 0.0436 | 1.00 |
| merck-ENST00000359867_at    | NILRC2                     | BC013743                        | 0.156   | 2.05  | 0.0436 | 1.00 |
| merck-ENST00000367603_a_at  | HIVEP2                     | NM_006734                       | 0.163   | 2.05  | 0.0436 | 1.00 |
| merck-AK001851_s_at         | QRSL1                      | NM_018292                       | 0.209   | 2.05  | 0.0437 | 1.00 |
| merck-NM_001005464_s_at     | HIST2H3A HIST2H3C HIST2H3D | NM_001005464 NM_021059 NM_00112 | -0.149  | -2.05 | 0.0437 | 1.00 |
| merck2-BC0171739_at         | THEM4                      | NM_053055                       | 0.234   | 2.04  | 0.0437 | 1.00 |
| merck-BC108287_a_at         | ZNF516                     | NM_014643                       | -0.283  | -2.04 | 0.0437 | 1.00 |
| merck2-BG320607_x_at        | PSAP                       | NM_002778 NM_001042465 NM_00104 | -0.0612 | -2.04 | 0.0438 | 1.00 |
| merck2-XM_098264_s_at       | LOC100128651               | DZ2711                          | -0.114  | -2.04 | 0.0438 | 1.00 |
| merck-AV715889_s_at         | SKP1 LOC728622             | NM_006930 NM_170679 NR_036619   | 0.113   | 2.04  | 0.0438 | 1.00 |
| merck-ENST00000373790_at    | TAF1                       | NM_004606 NM_138923             | 0.127   | 2.04  | 0.0438 | 1.00 |
| merck-AI421220_at           | ---                        | AL161785                        | -0.175  | -2.04 | 0.0438 | 1.00 |
| merck-NM_015327_at          | SMG5                       | NM_015327                       | -0.169  | -2.04 | 0.0438 | 1.00 |
| merck-BX537586_at           | STK17A                     | BC023508                        | 0.153   | 2.04  | 0.0438 | 1.00 |
| merck-BC050552_s_at         | NISCH                      | BC050552                        | -0.114  | -2.04 | 0.0438 | 1.00 |
| merck-NM_016217_at          | HECA                       | NM_016217                       | 0.0710  | 2.04  | 0.0439 | 1.00 |
| merck-CR621898_at           | ---                        | CR621898                        | 0.142   | 2.04  | 0.0439 | 1.00 |
| merck-AV852694_at           | ---                        | ---                             | -0.0931 | -2.04 | 0.0439 | 1.00 |
| merck-ENST00000304993_at    | ---                        | XR_108331 XR_114966             | -0.136  | -2.04 | 0.0439 | 1.00 |
| merck2-AK172753_at          | PPP1R21                    | NM_001135629 NM_152994 NM_00119 | 0.103   | 2.04  | 0.0439 | 1.00 |
| merck-NM_014731_at          | ProSAPIP1                  | NM_014731                       | -0.131  | -2.04 | 0.0439 | 1.00 |

|                            |               |                                  |         |       |        |      |
|----------------------------|---------------|----------------------------------|---------|-------|--------|------|
| merck-NM_003415_at         | ZNF268        | NM_003415 NM_001165881 NM_15294  | 0.176   | 2.04  | 0.0439 | 1.00 |
| merck-ENST00000313566_at   | AP4S1         | NM_001128126                     | 0.139   | 2.04  | 0.0440 | 1.00 |
| merck2-AW665829_at         | ---           | D00596                           | 0.161   | 2.04  | 0.0440 | 1.00 |
| merck2-NM_199127_s_at      | ---           | ---                              | -0.231  | -2.04 | 0.0440 | 1.00 |
| merck2-NM_007110_at        | TEP1          | NM_007110                        | -0.123  | -2.04 | 0.0440 | 1.00 |
| merck2-NM_001100874_at     | SLC9B1        | NM_001100874                     | -0.127  | -2.04 | 0.0440 | 1.00 |
| merck-NM_015137_at         | EFR3A         | NM_015137                        | 0.153   | 2.04  | 0.0440 | 1.00 |
| merck-NM_004566_at         | PFKFB3        | NM_004566 NM_001145443           | -0.167  | -2.04 | 0.0441 | 1.00 |
| merck2-BX647290_at         | EIF2S3        | BX647290                         | 0.120   | 2.04  | 0.0441 | 1.00 |
| merck-ENST00000373701_s_at | OGT           | NM_181672 NM_181673              | 0.204   | 2.04  | 0.0441 | 1.00 |
| merck-AF088004_at          | ---           | AF088004                         | -0.170  | -2.04 | 0.0441 | 1.00 |
| merck-NM_003639_s_at       | IKBKG         | NM_00109857 NM_00109856 NM_0C    | -0.119  | -2.04 | 0.0441 | 1.00 |
| merck-NM_001013723_s_at    | ZNRF2P1       | NR_003502                        | -0.111  | -2.04 | 0.0442 | 1.00 |
| merck2-NM_017979_at        | UNC45A        | NM_018671 NM_001039675           | -0.149  | -2.04 | 0.0442 | 1.00 |
| merck2-NM_001415_at        | ---           | NM_001415                        | 0.0804  | 2.04  | 0.0442 | 1.00 |
| merck2-AY346375_s_at       | ZNF582 ZNF812 | NM_001130031 NM_001130032 NM_01  | -0.128  | -2.04 | 0.0442 | 1.00 |
| merck-AA860629_at          | ---           | AP002755                         | -0.128  | -2.04 | 0.0443 | 1.00 |
| merck-BC002682_a_at        | DUSP3         | NM_004090                        | -0.146  | -2.04 | 0.0443 | 1.00 |
| merck-NM_003064_at         | SLP1          | NM_003064                        | -0.302  | -2.04 | 0.0443 | 1.00 |
| merck-NM_004783_at         | TAOK2         | NM_004783                        | -0.174  | -2.04 | 0.0443 | 1.00 |
| merck2-CR742385_at         | NUP93         | NM_014669                        | -0.143  | -2.04 | 0.0443 | 1.00 |
| merck2-NM_022073_at        | EGLN3         | NM_022073                        | 0.243   | 2.04  | 0.0444 | 1.00 |
| merck-AF195821_s_at        | TCL6          | AF195821                         | 0.216   | 2.04  | 0.0445 | 1.00 |
| merck-AK091013_at          | LOC401188     | AK091013                         | -0.145  | -2.04 | 0.0445 | 1.00 |
| merck2-BX348702_at         | TLK1          | NM_012290 NM_001136554 NM_00113  | 0.131   | 2.04  | 0.0445 | 1.00 |
| merck-AI765698_at          | ---           | AC080106                         | 0.334   | 2.04  | 0.0445 | 1.00 |
| merck-AK060307_s_at        | ---           | AK060307                         | 0.169   | 2.04  | 0.0445 | 1.00 |
| merck-CK002033_at          | ---           | ---                              | -0.0979 | -2.04 | 0.0445 | 1.00 |
| merck-BQ092793_s_at        | LOC100506119  | XR_108951 XR_108954 XR_108952 XF | -0.200  | -2.04 | 0.0446 | 1.00 |
| merck-G65655_x_at          | ---           | U73627                           | -0.178  | -2.04 | 0.0446 | 1.00 |
| merck-NM_178834_at         | LAYN          | NM_178834                        | -0.123  | -2.04 | 0.0446 | 1.00 |
| merck-DA395744_a_at        | POK2          | NM_001199898                     | 0.124   | 2.04  | 0.0446 | 1.00 |
| merck-RSE_0000067763_at    | ---           | NC_000929                        | 0.108   | 2.04  | 0.0446 | 1.00 |
| merck-NM_173077_at         | CPO           | NM_173077                        | 0.162   | 2.04  | 0.0446 | 1.00 |
| merck-NM_012217_at         | TPSD1         | NM_012217                        | -0.138  | -2.04 | 0.0447 | 1.00 |
| merck-NM_024760_s_at       | TL6E          | NM_001143986 NM_024760           | -0.137  | -2.04 | 0.0447 | 1.00 |
| merck-NM_005337_at         | NCKAP1L       | NM_005337 NM_001184976           | -0.133  | -2.04 | 0.0447 | 1.00 |
| merck-BF508564_at          | ---           | AL365273                         | -0.172  | -2.04 | 0.0447 | 1.00 |
| merck-NM_016049_at         | FAM158A       | NM_016049                        | -0.133  | -2.04 | 0.0447 | 1.00 |
| merck-NM_000245_at         | MET           | NM_001127500 NM_000245           | -0.122  | -2.03 | 0.0447 | 1.00 |
| merck2-BI025212_a_at       | AGTPBP1       | NM_015239                        | -0.131  | -2.03 | 0.0448 | 1.00 |
| merck-NM_000694_at         | ALDH3B1       | NM_000694 NM_001030010 NM_00116  | -0.197  | -2.03 | 0.0448 | 1.00 |
| merck2-AA169659_s_at       | ---           | ---                              | -0.155  | -2.03 | 0.0448 | 1.00 |
| merck-NC1783774_1_at       | ASCL2         | AL672206                         | 0.518   | 2.03  | 0.0448 | 1.00 |
| merck-NM_005170_at         | PRDM2         | NM_005170                        | -0.175  | -2.03 | 0.0448 | 1.00 |
| merck-NM_015866_at         | ---           | NM_015866 NM_001007257           | 0.108   | 2.03  | 0.0449 | 1.00 |
| merck-NM_020856_at         | TSHZ3         | NM_020856                        | -0.186  | -2.03 | 0.0449 | 1.00 |
| merck-NM_052889_s_at       | CARD16        | NM_001017534 NM_052889           | -0.274  | -2.03 | 0.0450 | 1.00 |
| merck-NM_080552_at         | SLC32A1       | NM_080552                        | -0.0991 | -2.03 | 0.0450 | 1.00 |
| merck2-AL543631_at         | TSPAN13       | NM_014399                        | 0.225   | 2.03  | 0.0450 | 1.00 |
| merck-NM_015690_at         | STK36         | NM_015690                        | -0.178  | -2.03 | 0.0450 | 1.00 |
| merck-AF330042_at          | ---           | AF330042                         | 0.130   | 2.03  | 0.0450 | 1.00 |
| merck-XM_925901_s_at       | ---           | AC217322                         | -0.134  | -2.03 | 0.0450 | 1.00 |
| merck-NM_000355_at         | TCN2          | NM_000355 NM_001184726           | -0.250  | -2.03 | 0.0451 | 1.00 |
| merck-ENST00000368374_s_at | GBA GBAP1     | NM_000157 NM_001005741 NM_0010C  | -0.170  | -2.03 | 0.0451 | 1.00 |
| merck2-VZV_OKA_O15_up_at   | ---           | ---                              | -0.129  | -2.03 | 0.0451 | 1.00 |
| merck-XM_945132_at         | ---           | ---                              | -0.126  | -2.03 | 0.0451 | 1.00 |
| merck-BM713507_at          | ---           | AC000117                         | -0.0858 | -2.03 | 0.0451 | 1.00 |
| merck-NM_000390_s_at       | CHM           | NM_000390                        | 0.273   | 2.03  | 0.0451 | 1.00 |
| merck-NM_001007_x_at       | RPS4X         | NM_001007                        | 0.0557  | 2.03  | 0.0451 | 1.00 |
| merck2-BI192949_at         | RERE          | NM_012102 NM_001042681 NM_00104  | -0.121  | -2.03 | 0.0452 | 1.00 |
| merck2-NM_030780_at        | SLC25A32      | NM_030780                        | 0.190   | 2.03  | 0.0452 | 1.00 |
| merck-NM_000509_at         | FOG           | NM_000509                        | 0.162   | 2.03  | 0.0452 | 1.00 |
| merck-AX772926_at          | SERPINE3      | NM_001101320                     | 0.108   | 2.03  | 0.0452 | 1.00 |
| merck-NM_138712_s_at       | PPARG         | NM_138712 NM_015869 NM_138711 N  | -0.163  | -2.03 | 0.0453 | 1.00 |
| merck-NM_207383_at         | FLJ42289      | NR_028139 NR_028140              | -0.143  | -2.03 | 0.0453 | 1.00 |
| merck-NM_002769_s_at       | PRSS1         | NM_002769                        | 0.0905  | 2.03  | 0.0453 | 1.00 |
| merck2-NM_013289_at        | KPR3D1        | NM_013289                        | -0.277  | -2.03 | 0.0453 | 1.00 |
| merck2-BX647795_at         | MIPOL1        | BX647795                         | 0.0997  | 2.03  | 0.0453 | 1.00 |
| merck-BC047016_a_at        | FCHSD1        | NM_033449                        | -0.162  | -2.03 | 0.0453 | 1.00 |
| merck-ENST00000314117_at   | RELL1         | NM_001085399                     | -0.137  | -2.03 | 0.0453 | 1.00 |
| merck2-AB209992_at         | DSP           | NM_004415 NM_001008844           | 0.382   | 2.03  | 0.0454 | 1.00 |
| merck2-BP197851_x_at       | ---           | ---                              | 0.132   | 2.03  | 0.0454 | 1.00 |
| merck-NM_001004320_at      | AGMO          | NM_001004320                     | -0.144  | -2.03 | 0.0454 | 1.00 |
| merck-AK126693_at          | ---           | AK126693                         | -0.129  | -2.03 | 0.0454 | 1.00 |
| merck-ENST00000327832_x_at | LOC283911     | ALB33480                         | -0.126  | -2.03 | 0.0455 | 1.00 |
| merck2-BX107168_at         | ---           | AF321561                         | 0.144   | 2.03  | 0.0455 | 1.00 |
| merck-NM_003410_a_at       | ZFX           | NM_003410 NM_001178084 NM_00117  | 0.250   | 2.03  | 0.0456 | 1.00 |
| merck-AF339767_at          | ---           | ---                              | -0.194  | -2.03 | 0.0456 | 1.00 |
| merck-M13994_a_at          | BCL2          | NM_000633                        | 0.178   | 2.03  | 0.0456 | 1.00 |
| merck-AW027926_at          | ---           | NC_008295                        | -0.128  | -2.03 | 0.0456 | 1.00 |
| merck-AW105183_at          | ---           | ---                              | 0.161   | 2.03  | 0.0456 | 1.00 |
| merck-NM_001549_at         | IFIT3         | NM_001549 NM_001031683           | -0.377  | -2.03 | 0.0457 | 1.00 |
| merck2-BF697947_at         | ---           | ---                              | -0.114  | -2.03 | 0.0457 | 1.00 |
| merck-XM_108467_at         | ---           | AC024367                         | -0.130  | -2.03 | 0.0457 | 1.00 |
| merck-AK091929_a_at        | ZFP106        | NM_022473                        | -0.156  | -2.03 | 0.0457 | 1.00 |
| merck-NC11951691_1_x_at    | ---           | NC_010914                        | 0.166   | 2.03  | 0.0457 | 1.00 |
| merck-AK097116_at          | ---           | AK097116                         | -0.128  | -2.02 | 0.0458 | 1.00 |
| merck-BC018008_s_at        | ---           | BC018008                         | -0.102  | -2.02 | 0.0458 | 1.00 |
| merck-NM_021244_a_at       | RRAGD         | NM_021244                        | -0.137  | -2.02 | 0.0458 | 1.00 |
| merck-BC070228_a_at        | C7orf13       | NR_026865                        | -0.127  | -2.02 | 0.0458 | 1.00 |
| merck2-AI263000_at         | NARS2         | NM_024678 NR_027479              | 0.181   | 2.02  | 0.0458 | 1.00 |
| merck2-BF680332_x_at       | ---           | ---                              | -0.125  | -2.02 | 0.0459 | 1.00 |
| merck-NM_173502_at         | PRSS36        | NM_173502                        | -0.121  | -2.02 | 0.0460 | 1.00 |
| merck-ENST00000378484_at   | ---           | AF090884                         | -0.129  | -2.02 | 0.0460 | 1.00 |
| merck-XM_932008_at         | ---           | ---                              | 0.137   | 2.02  | 0.0460 | 1.00 |
| merck-NM_138362_at         | FAM104B       | NM_138362 NM_001166699 NR_03072  | 0.156   | 2.02  | 0.0461 | 1.00 |
| merck-NM_025135_at         | FHOD3         | NM_025135                        | 0.152   | 2.02  | 0.0461 | 1.00 |
| merck-NM_152467_at         | KLHL10        | NM_152467                        | -0.168  | -2.02 | 0.0461 | 1.00 |
| merck2-M10051_at           | INSR          | NM_002008 NM_001079817           | -0.150  | -2.02 | 0.0461 | 1.00 |
| merck-AK054661_a_at        | PCDH9         | NM_203487 NM_020403              | 0.304   | 2.02  | 0.0461 | 1.00 |
| merck2-NM_006187_at        | OAS3          | NM_006187                        | -0.374  | -2.02 | 0.0462 | 1.00 |
| merck-NM_001062_at         | TCN1          | NM_001062                        | -0.304  | -2.02 | 0.0462 | 1.00 |
| merck2-AV219181_at         | PKHD1L1       | NM_117531                        | 0.207   | 2.02  | 0.0462 | 1.00 |
| merck-NM_101395_s_at       | DYRK1A        | NM_001396 NM_130436 NM_101395 N  | 0.110   | 2.02  | 0.0462 | 1.00 |
| merck-NM_015087_at         | SPG20         | NM_015087 NM_001142296 NM_00114  | 0.228   | 2.02  | 0.0462 | 1.00 |
| merck-BI094070_at          | ---           | ---                              | -0.0871 | -2.02 | 0.0463 | 1.00 |
| merck2-NM_018404_at        | ADAP2         | NM_018404                        | -0.199  | -2.02 | 0.0463 | 1.00 |
| merck-ENST000003075762_at  | GTDC1         | AK126774                         | 0.114   | 2.02  | 0.0463 | 1.00 |
| merck-NM_006766_at         | KAT6A         | NM_001099412 NM_001099413 NM_0C  | -0.0942 | -2.02 | 0.0463 | 1.00 |
| merck2-AB055660_at         | SHROOM3       | NM_020859                        | -0.112  | -2.02 | 0.0463 | 1.00 |
| merck2-DA738256_at         | KTN1          | NM_182926 NM_001079521 NM_00101  | -0.128  | -2.02 | 0.0463 | 1.00 |
| merck2-NM_033254_at        | ---           | ---                              | 0.147   | 2.02  | 0.0464 | 1.00 |
| merck-NM_002844_at         | PTPRK         | NM_001135648 NM_002844           | 0.331   | 2.02  | 0.0464 | 1.00 |
| merck2-BC033793_at         | ---           | NM_001062                        | 0.132   | 2.02  | 0.0464 | 1.00 |
| merck-AK094441_at          | ---           | AK094441                         | 0.179   | 2.02  | 0.0464 | 1.00 |
| merck2-AW270829_a_at       | RAD51C        | NM_058216 NM_002876              | -0.144  | -2.02 | 0.0464 | 1.00 |
| merck2-BX647755_at         | GABPA         | NM_002040 NM_001197297           | 0.206   | 2.02  | 0.0464 | 1.00 |
| merck-AK021429_a_at        | SH3RF1        | NM_020870                        | -0.131  | -2.02 | 0.0464 | 1.00 |
| merck-AB209463_s_at        | CSNK1D        | NM_001893 NM_139062              | -0.143  | -2.02 | 0.0464 | 1.00 |
| merck-BC017745_a_at        | NUP1P1        | NM_012345                        | 0.128   | 2.02  | 0.0464 | 1.00 |
| merck-ALB34345_at          | MOBP2D2       | ALB34345                         | 0.186   | 2.02  | 0.0465 | 1.00 |
| merck2-AA825724_at         | GPR113        | NM_001145169 NM_153835           | -0.0847 | -2.02 | 0.0465 | 1.00 |
| merck-NM_004614_s_at       | TK2           | NM_004614 NM_001172644 NM_00117  | -0.120  | -2.02 | 0.0465 | 1.00 |
| merck-CR625009_at          | ---           | CR625009                         | 0.137   | 2.02  | 0.0465 | 1.00 |
| merck-BC038580_at          | ---           | BC038580                         | 0.261   | 2.02  | 0.0465 | 1.00 |
| merck2-BX436262_at         | SULT4A1       | NM_014351                        | -0.112  | -2.02 | 0.0466 | 1.00 |
| merck-AK097988_at          | LOC283745     | AK097988                         | -0.162  | -2.02 | 0.0466 | 1.00 |
| merck-NM_001831_at         | CLU           | NM_001831 NM_203339 NM_00117113  | 0.157   | 2.02  | 0.0466 | 1.00 |

|                               |                   |                                  |         |       |        |      |
|-------------------------------|-------------------|----------------------------------|---------|-------|--------|------|
| merck-NM_004063_at            | CDH17             | NM_004063 NM_01144663            | -0.198  | -2.02 | 0.0466 | 1.00 |
| merck2-AF080216_at            | BCL11A            | NM_018014 NM_138559              | 0.196   | 2.02  | 0.0466 | 1.00 |
| merck2-NM_145175_s_at         | FAM84A            | NM_145175                        | -0.129  | -2.02 | 0.0466 | 1.00 |
| merck2-NM_024874_at           | KIAA0319L         | NM_024874                        | -0.185  | -2.02 | 0.0467 | 1.00 |
| merck2-BC030787_at            | OFD1              | NM_003611                        | 0.185   | 2.02  | 0.0467 | 1.00 |
| merck-AV724728_at             | ---               | AC009331                         | 0.144   | 2.02  | 0.0467 | 1.00 |
| merck-NC_001405_ORF_1036_s_at | ---               | ---                              | -0.115  | -2.02 | 0.0467 | 1.00 |
| merck-NM_001662_at            | ARF5              | NM_001662                        | -0.162  | -2.02 | 0.0468 | 1.00 |
| merck2-CR609402_at            | ---               | AF067136                         | -0.220  | -2.02 | 0.0468 | 1.00 |
| merck-ENST00000360812_a_at    | TTY2 TTTY2B       | NR_001536 NR_003590              | -0.145  | 2.01  | 0.0468 | 1.00 |
| merck-T98486_s_at             | ---               | ---                              | 0.174   | 2.01  | 0.0468 | 1.00 |
| merck-NM_005860_at            | FSTL3             | NM_005860                        | -0.135  | -2.01 | 0.0469 | 1.00 |
| merck2-NM_153231_at           | ZNF550            | BX538032                         | 0.203   | 2.01  | 0.0469 | 1.00 |
| merck2-BG704181_a_at          | SEPT15            | NM_004261 NM_203341              | 0.181   | 2.01  | 0.0469 | 1.00 |
| merck-BC110332_a_at           | ZNF507            | NM_001136156 NM_014910           | 0.186   | 2.01  | 0.0469 | 1.00 |
| merck-NM_018120_at            | ARMC1             | NM_018120                        | 0.102   | 2.01  | 0.0469 | 1.00 |
| merck-H00927_at               | ---               | ---                              | -0.0734 | -2.01 | 0.0470 | 1.00 |
| merck-AI698687_at             | ---               | ---                              | 0.0949  | 2.01  | 0.0471 | 1.00 |
| merck-NM_012143_s_at          | TFIP11            | NM_001008697 NM_012143           | -0.162  | -2.01 | 0.0471 | 1.00 |
| merck2-AK075393_s_at          | CTS8              | NM_001908 NM_147780 NM_147781 N  | -0.0860 | -2.01 | 0.0471 | 1.00 |
| merck2-NM_005456_s_at         | IFH4              | ---                              | -0.265  | -2.01 | 0.0472 | 1.00 |
| merck-NM_024007_s_at          | EBF1              | NM_024007                        | 0.224   | 2.01  | 0.0472 | 1.00 |
| merck-DV080308_at             | DNAH12            | NM_178504                        | -0.179  | -2.01 | 0.0472 | 1.00 |
| merck-ENST00000322446_a_at    | EIF2S3            | NM_001415                        | 0.144   | 2.01  | 0.0472 | 1.00 |
| merck2-BE222032_at            | ---               | AJ336618                         | -0.181  | -2.01 | 0.0472 | 1.00 |
| merck-ENST00000356030_at      | ---               | ---                              | 0.212   | 2.01  | 0.0472 | 1.00 |
| merck-BN973550_at             | ---               | ---                              | -0.123  | -2.01 | 0.0472 | 1.00 |
| merck2-BF965720_x_at          | ---               | ---                              | -0.225  | -2.01 | 0.0473 | 1.00 |
| merck-AK098763_at             | FLJ25917          | AK098763                         | 0.220   | 2.01  | 0.0473 | 1.00 |
| merck2-NM_005826_at           | HNRNPR            | NM_001102398 NM_005826 NM_00110  | 0.0982  | 2.01  | 0.0473 | 1.00 |
| merck-AL833235_at             | SLC9A7P1          | NR_033801                        | -0.160  | -2.01 | 0.0473 | 1.00 |
| merck-NM_080664_s_at          | C14orf126         | NM_080664                        | 0.159   | 2.01  | 0.0474 | 1.00 |
| merck-NM_006417_at            | IFI44             | NM_006417                        | -0.457  | -2.01 | 0.0474 | 1.00 |
| merck-NM_030824_at            | ZNF442            | NM_030824                        | 0.170   | 2.01  | 0.0474 | 1.00 |
| merck-NM_001039674_x_at       | USP6              | NM_004505                        | 0.128   | 2.01  | 0.0474 | 1.00 |
| merck2-ENST00000262033_at     | ---               | ---                              | 0.117   | 2.01  | 0.0474 | 1.00 |
| merck-NM_012121_at            | CDC42EP4          | NM_012121                        | -0.131  | -2.01 | 0.0474 | 1.00 |
| merck-NM_173572_at            | C10orf93          | NM_173572                        | -0.101  | -2.01 | 0.0474 | 1.00 |
| merck-NM_017857_at            | SSH3              | NM_017857                        | -0.179  | -2.01 | 0.0475 | 1.00 |
| merck2-AK057568_at            | ---               | ---                              | 0.200   | 2.01  | 0.0476 | 1.00 |
| merck-NM_145064_at            | STAC3             | NM_145064                        | -0.215  | -2.01 | 0.0477 | 1.00 |
| merck-BU521288_s_at           | NUDT3 RPS10-NUDT3 | NM_006703 NM_001202470           | -0.137  | -2.01 | 0.0477 | 1.00 |
| merck-BC009808_at             | NBR1              | BC009808                         | -0.156  | -2.01 | 0.0477 | 1.00 |
| merck-AK026670_s_at           | METT14            | NM_022840                        | 0.202   | 2.01  | 0.0477 | 1.00 |
| merck-BE737112_at             | ---               | ---                              | -0.173  | -2.01 | 0.0477 | 1.00 |
| merck2-NM_001103169_a_at      | AADACL3           | NM_001103170 NM_001103169        | -0.145  | -2.01 | 0.0477 | 1.00 |
| merck-AK057104_s_at           | LOC100294145      | NR_037177 NR_037178 XR_110964 XF | 0.203   | 2.01  | 0.0478 | 1.00 |
| merck-NM_002300_s_at          | LDHB              | NM_002300 NM_001174097           | 0.133   | 2.01  | 0.0478 | 1.00 |
| merck2-AK027825_at            | SLC38A1           | NM_030674 NM_001077484           | 0.160   | 2.01  | 0.0478 | 1.00 |
| merck2-NM_018324_at           | OLAH              | NM_018324 NM_001039702           | -0.159  | -2.01 | 0.0478 | 1.00 |
| merck-NM_032038_at            | SPNS1             | NM_032038 NM_001142448 NM_00114  | -0.137  | -2.01 | 0.0478 | 1.00 |
| merck2-W02883_at              | KPNB1             | L38951                           | -0.111  | -2.00 | 0.0479 | 1.00 |
| merck-NM_203472_at            | SELS              | NM_203472                        | -0.230  | -2.00 | 0.0479 | 1.00 |
| merck2-AI247169_x_at          | ---               | ---                              | -0.139  | -2.00 | 0.0479 | 1.00 |
| merck2-AV382852_at            | SF3B1             | NM_012433                        | -0.107  | -2.00 | 0.0480 | 1.00 |
| merck2-BQ218842_at            | ---               | ---                              | -0.0809 | -2.00 | 0.0480 | 1.00 |
| merck2-BC089862_at            | IGFBP5            | NM_000599                        | 0.164   | 2.00  | 0.0480 | 1.00 |
| merck-BC039828_a_at           | SMC6              | NM_001142286 NM_024624           | 0.156   | 2.00  | 0.0480 | 1.00 |
| merck2-NM_004867_at           | ITM2A             | NM_004867 NM_001171581           | 0.211   | 2.00  | 0.0480 | 1.00 |
| merck2-CD250161_at            | ---               | ---                              | 0.107   | 2.00  | 0.0480 | 1.00 |
| merck-AK090842_at             | ---               | CR597563                         | -0.181  | -2.00 | 0.0480 | 1.00 |
| merck-NM_018101_at            | CDC48             | NM_018101                        | -0.206  | -2.00 | 0.0480 | 1.00 |
| merck-XM_940076_at            | ---               | ---                              | -0.122  | -2.00 | 0.0481 | 1.00 |
| merck-NM_001010844_s_at       | IRAK1BP1          | NM_001010844                     | 0.153   | 2.00  | 0.0481 | 1.00 |
| merck-AV263638_a_at           | PRKD1             | NM_002742                        | -0.179  | -2.00 | 0.0482 | 1.00 |
| merck-BX093353_at             | ---               | AL133167                         | 0.155   | 2.00  | 0.0482 | 1.00 |
| merck2-BP331530_a_at          | RRBP1             | NM_001042576 NM_004587           | -0.140  | -2.00 | 0.0482 | 1.00 |
| merck-NM_032814_a_at          | RNF12             | NM_001109903 NM_032814           | 0.183   | 2.00  | 0.0482 | 1.00 |
| merck2-BC038724_at            | REEF3             | NM_0010010130                    | -0.262  | -2.00 | 0.0482 | 1.00 |
| merck-BC040914_at             | ---               | BC040914                         | 0.288   | 2.00  | 0.0482 | 1.00 |
| merck2-AF025304_at            | EPHB2             | NM_017449 NM_004442              | -0.162  | -2.00 | 0.0483 | 1.00 |
| merck2-NM_024587_at           | TMEM53            | NM_024587                        | -0.132  | -2.00 | 0.0483 | 1.00 |
| merck-AB231705_at             | LOC6444277        | XR_110541 XR_114547              | -0.148  | -2.00 | 0.0483 | 1.00 |
| merck2-DQ891344_s_at          | ---               | ---                              | 0.283   | 2.00  | 0.0483 | 1.00 |
| merck-NM_015386_at            | COG4              | NM_015386 NM_001195139           | -0.220  | -2.00 | 0.0483 | 1.00 |
| merck-AV715015_s_at           | CNR2              | EU517121                         | 0.168   | 2.00  | 0.0484 | 1.00 |
| merck2-AI654832_at            | ---               | ---                              | -0.170  | -2.00 | 0.0484 | 1.00 |
| merck-NM_005186_s_at          | CAPN1             | NM_001198868 NM_005186 NM_00119  | -0.169  | -2.00 | 0.0484 | 1.00 |
| merck-AF162278_a_at           | POU2F3            | NM_014352                        | 0.167   | 2.00  | 0.0485 | 1.00 |
| merck-NM_016310_at            | POLR3K            | NM_016310                        | -0.172  | -2.00 | 0.0485 | 1.00 |
| merck-NM_032622_at            | ---               | ---                              | 0.101   | 2.00  | 0.0485 | 1.00 |
| merck-AF355799_a_at           | DEFT1P DEFT1P2    | NR_036686 NR_036687              | -0.148  | -2.00 | 0.0486 | 1.00 |
| merck-NM_032350_s_at          | C7orf50           | NM_032350 NM_001134395 NM_00113  | -0.146  | -2.00 | 0.0486 | 1.00 |
| merck-NM_017539_at            | DNAH3             | NM_017539                        | 0.136   | 2.00  | 0.0486 | 1.00 |
| merck-BC063531_a_at           | SIN3B             | NM_015260                        | -0.192  | -2.00 | 0.0486 | 1.00 |
| merck-BX647668_at             | PHC3              | NM_024947                        | 0.173   | 2.00  | 0.0486 | 1.00 |
| merck2-BE511240_x_at          | ---               | ---                              | -0.0830 | -2.00 | 0.0487 | 1.00 |
| merck-XM_943067_at            | ---               | AY952890                         | -0.0983 | -2.00 | 0.0487 | 1.00 |
| merck-BC005286_a_at           | EPM2A             | NM_005670                        | 0.175   | 2.00  | 0.0487 | 1.00 |
| merck2-BX537483_at            | ITGA6             | NM_001079818 NM_000210           | 0.157   | 2.00  | 0.0488 | 1.00 |
| merck-ENST00000244221_a_at    | PAIP2B            | NM_020459                        | 0.148   | 2.00  | 0.0488 | 1.00 |
| merck-NM_152570_s_at          | LINC02            | NM_152570                        | -0.172  | -2.00 | 0.0488 | 1.00 |
| merck2-AK097700_at            | LOC146880         | NR_027487                        | -0.198  | -2.00 | 0.0488 | 1.00 |
| merck-NM_001365_at            | DLG4              | NM_001365 NM_001128827           | -0.145  | -2.00 | 0.0488 | 1.00 |
| merck-DB074303_at             | ---               | ---                              | -0.138  | -2.00 | 0.0488 | 1.00 |
| merck-NM_152773_at            | TCTEX102          | NM_152773                        | -0.111  | -2.00 | 0.0488 | 1.00 |
| merck-NM_005032_at            | PLS3              | NM_005032 NM_001136025 NM_00117  | 0.181   | 2.00  | 0.0489 | 1.00 |
| merck-XM_496769_at            | ---               | AK123308                         | -0.109  | -2.00 | 0.0489 | 1.00 |
| merck2-AV687925_s_at          | EEF1G             | NM_001404                        | 0.113   | 2.00  | 0.0489 | 1.00 |
| merck-NM_002424_at            | MMP8              | NM_002424                        | -0.408  | -2.00 | 0.0489 | 1.00 |
| merck-NM_182621_at            | FAM159A           | BC041608                         | 0.218   | 2.00  | 0.0489 | 1.00 |
| merck-ENST00000326189_at      | LOC646976         | AK096082                         | -0.149  | -2.00 | 0.0489 | 1.00 |
| merck2-AA001222_at            | ---               | ---                              | 0.174   | 2.00  | 0.0489 | 1.00 |
| merck-ENST00000379938_at      | RREB1             | NM_001003699 NM_001168344 NM_00  | -0.0840 | -2.00 | 0.0490 | 1.00 |
| merck-DA100265_a_at           | PTPRZ1            | NM_002851                        | -0.115  | 2.00  | 0.0490 | 1.00 |
| merck2-Rota_P_s3_s_at         | ---               | ---                              | -0.0744 | -2.00 | 0.0490 | 1.00 |
| merck-NR_002748_x_at          | SNORD45B          | NR_002748                        | 0.333   | 1.99  | 0.0490 | 1.00 |
| merck2-CB962172_x_at          | ---               | ---                              | -0.0866 | -1.99 | 0.0490 | 1.00 |
| merck-NM_018068_s_at          | PIWIL2            | NM_001135721 NM_018068           | -0.199  | -1.99 | 0.0490 | 1.00 |
| merck-NM_004747_at            | DLG5              | NM_004747                        | 0.171   | 1.99  | 0.0490 | 1.00 |
| merck-ENST00000342371_x_at    | OR7E37P MGC7280   | NR_002163 NR_002822              | -0.153  | -1.99 | 0.0490 | 1.00 |
| merck-AK023235_at             | EXOG              | NM_005107 NM_001145464           | 0.171   | 1.99  | 0.0490 | 1.00 |
| merck-CR593570_a_at           | GPR107            | NM_001136557 NM_001136558 NM_02  | -0.193  | -1.99 | 0.0490 | 1.00 |
| merck-NM_014368_at            | LHX6              | NM_014368 NM_199160              | 0.212   | 1.99  | 0.0491 | 1.00 |
| merck-AF147360_at             | ---               | AF147360                         | 0.433   | 1.99  | 0.0491 | 1.00 |
| merck-NM_145029_a_at          | C6orf136          | NM_001109938 NM_145029 NM_00116  | -0.194  | -1.99 | 0.0491 | 1.00 |
| merck2-BX647602_at            | C6orf42           | NM_023073                        | -0.115  | -1.99 | 0.0491 | 1.00 |
| merck-AK028301_a_at           | RPS6KA6           | NM_014496                        | 0.164   | 1.99  | 0.0491 | 1.00 |
| merck-NM_000803_at            | FOLR2             | NM_000803 NM_00113534 NM_00111   | -0.211  | -1.99 | 0.0491 | 1.00 |
| merck-BC008462_s_at           | ---               | BC008462                         | -0.180  | -1.99 | 0.0491 | 1.00 |
| merck-AI341167_a_at           | CD163             | NM_004244 NM_203416              | -0.283  | -1.99 | 0.0491 | 1.00 |
| merck2-NM_004895_2_at         | NLRP3             | NM_004895 NM_183395 NM_00107986  | -0.190  | -1.99 | 0.0492 | 1.00 |
| merck-NM_153742_at            | CTH               | NM_001902 NM_153742 NM_00119046  | 0.123   | 1.99  | 0.0492 | 1.00 |
| merck2-BU684534_at            | ---               | ---                              | -0.186  | -1.99 | 0.0492 | 1.00 |
| merck-BC045691_at             | RALGPS2           | NM_152663                        | 0.232   | 1.99  | 0.0492 | 1.00 |
| merck2-BC042674_at            | PLB1              | NM_153021 NM_001170585           | -0.164  | -1.99 | 0.0492 | 1.00 |
| merck-AK056307_a_at           | CUX1              | NM_181552 NM_001202543 XR_10885  | -0.145  | -1.99 | 0.0492 | 1.00 |
| merck2-BX646841_at            | ---               | XR_108561 XR_112720 XR_113724    | 0.140   | 1.99  | 0.0492 | 1.00 |
| merck-ENST0000033891_a_at     | PCLO              | NM_033026 NM_014510              | -0.134  | -1.99 | 0.0492 | 1.00 |

|                            |              |                                 |         |       |        |      |
|----------------------------|--------------|---------------------------------|---------|-------|--------|------|
| merck-NM_198570_at         | VWC2         | NM_198570                       | -0.0885 | -1.99 | 0.0493 | 1.00 |
| merck-CR610223_a_at        | SCARB2       | NM_005506 NM_001204255          | -0.279  | -1.99 | 0.0493 | 1.00 |
| merck-NM_002595_s_at       | CDK17        | NM_002595 NM_001170464          | 0.182   | 1.99  | 0.0493 | 1.00 |
| merck-AL117542_at          | ---          | AL117542                        | -0.139  | -1.99 | 0.0493 | 1.00 |
| merck-AJ003145_at          | OR1F2P       | NR_002169                       | -0.146  | -1.99 | 0.0493 | 1.00 |
| merck-NM_003294_s_at       | TPSAB1 TPSB2 | NM_003294 NM_024164 XM_00311964 | -0.185  | -1.99 | 0.0494 | 1.00 |
| merck-NM_002534_a_at       | OAS1         | NM_016816 NM_002534 NM_0010324C | -0.322  | -1.99 | 0.0494 | 1.00 |
| merck-BX404802_at          | ---          | EF445017                        | -0.126  | -1.99 | 0.0494 | 1.00 |
| merck-NM_032974_at         | CASP10       | NM_032974                       | -0.121  | -1.99 | 0.0494 | 1.00 |
| merck2-AI147879_at         | ---          | EU280320                        | -0.184  | -1.99 | 0.0495 | 1.00 |
| merck-BX640760_s_at        | NBEA         | NM_015678 NM_001204197          | 0.190   | 1.99  | 0.0495 | 1.00 |
| merck2-BI765353_at         | REEP5        | NM_005669                       | 0.147   | 1.99  | 0.0495 | 1.00 |
| merck-AK125365_at          | C19orf50     | BX648739                        | -0.100  | -1.99 | 0.0495 | 1.00 |
| merck-XM_936352_at         | ---          | ---                             | -0.136  | -1.99 | 0.0496 | 1.00 |
| merck-ENST00000340005_x_at | ---          | ---                             | 0.0787  | 1.99  | 0.0496 | 1.00 |
| merck-NM_207318_a_at       | FAM199X      | NM_207318                       | 0.135   | 1.99  | 0.0496 | 1.00 |
| merck-NM_054104_at         | OR6C3        | NM_054104                       | 0.223   | 1.99  | 0.0496 | 1.00 |
| merck-AK123850_at          | CEACAM22P    | NR_027754                       | -0.132  | -1.99 | 0.0496 | 1.00 |
| merck2-XM_937563_a_at      | HAUS6        | NM_017645                       | -0.145  | -1.99 | 0.0496 | 1.00 |
| merck-NM_001007255_at      | KLHDC9       | NM_152366 NM_001007255 NR_03338 | -0.136  | -1.99 | 0.0497 | 1.00 |
| merck2-BX648405_s_at       | DDX21        | BX648405                        | 0.178   | 1.99  | 0.0497 | 1.00 |
| merck-NM_001005962_s_at    | ERBB2        | NM_004448 NM_001005962          | -0.240  | -1.99 | 0.0497 | 1.00 |
| merck-AF075028_at          | FXR1         | NM_005087 NM_001013438 NM_00101 | 0.131   | 1.99  | 0.0498 | 1.00 |
| merck-NM_005739_at         | RASGRP1      | NM_005739 NM_001128602          | 0.171   | 1.99  | 0.0498 | 1.00 |
| merck2-BE614460_at         | C11orf46     | BX647617                        | 0.224   | 1.99  | 0.0498 | 1.00 |
| merck-NM_173473_s_at       | ANAPC16      | NM_173473                       | 0.154   | 1.99  | 0.0498 | 1.00 |
| merck-NM_001242_at         | CD27         | NM_001242                       | 0.190   | 1.99  | 0.0498 | 1.00 |
| merck-NM_004314_at         | ART1         | NM_004314                       | -0.151  | -1.99 | 0.0499 | 1.00 |
| merck2-AI654073_at         | ---          | AL589842                        | 0.221   | 1.99  | 0.0499 | 1.00 |
| merck-NM_173506_at         | LYPD4        | NM_173506                       | -0.142  | -1.99 | 0.0499 | 1.00 |
| merck2-NM_001080495_x_at   | TNRC18       | NM_001080495                    | -0.128  | -1.99 | 0.0499 | 1.00 |
| merck-BU509154_at          | PPP2R1B      | NM_002716 NM_001177562 NM_00117 | 0.129   | 1.99  | 0.0499 | 1.00 |
| merck-AA454219_at          | ---          | EUS32860                        | -0.141  | -1.99 | 0.0499 | 1.00 |
| merck-BU741143_at          | ---          | ---                             | -0.112  | -1.99 | 0.0499 | 1.00 |
| merck2-BQ441045_at         | ---          | ---                             | -0.116  | -1.99 | 0.0500 | 1.00 |
| merck2-ENST00000376242_at  | PSORS1C3     | NR_026816                       | -0.130  | -1.99 | 0.0500 | 1.00 |

List of 2,227 transcript identified in the EM131 dataset as being differentially expressed between HBV vaccine responders and poor-responders (moderated t-test: nominal  $p \leq 0.05$ ).

1,004 transcripts were induced in HBV vaccine responders (red) and 1,223 transcripts were repressed in HBV vaccine responders (blue) compared to HBV vaccine poor-responders.

For each transcript, its probeset identifier, its HUGO gene symbol, RefSeq accession number, fold difference between HBV vaccine responders versus poor-responders and the moderated t-test p-values are given. The transcripts belonging to the 15-gene expression signature are highlighted in grey.

**Supplementary Table 4b. Prediction of HBV vaccine response of the 15-gene signature on the EM131 test set**

| HBV vaccine    | predicted by the 15-gene signature |                |
|----------------|------------------------------------|----------------|
|                | responder                          | poor responder |
| responder      | 9                                  | 8              |
| poor responder | 9                                  | 19             |

The 15-gene signature has an accuracy of 62.2% on the EM131 test set

**Supplementary Table 4c. Pathway enrichment analysis among genes differentially expressed between HBV vaccine responders and poor-responders**

| Pathway                                              | Ratio | nominal p-value | adjusted p-value | Intersect                                                            |
|------------------------------------------------------|-------|-----------------|------------------|----------------------------------------------------------------------|
| <b>B-cell signaling</b>                              |       |                 |                  |                                                                      |
| B_CELL_DEVELOPMENT                                   | 0.406 | 1.70E-07        | 6.33E-05         | IGHG1,CD79B,HLA-DQA1,CD40,IGHM,HLA-DOB,HLA-DQB1,HLA-DRB1,CD79A,IL    |
| ALTERED_T_CELL_AND_B_CELL_SIGNALING_IN_RHEUMATOID_AF | 0.155 | 0.00868         | 0.231            | IGHG1,PTN3,CD79B,HLA-DQA1,CD40,IGHM,TNFSF13B,HLA-DOB,HLA-DQB1,I      |
| <b>RAS signaling</b>                                 |       |                 |                  |                                                                      |
| VEGF_SIGNALING                                       | 0.176 | 0.00133         | 0.0991           | FIGF,EIF1AY,EIF1AX,PIK3R3,RRAS2,VEGFC,ATM,YWHA,SOS2,FOXO1,EIF2S3,    |
| EIF2_SIGNALING                                       | 0.131 | 0.0461          | 0.409            | EIF1AY,EIF1AX,PIK3R3,RRAS2,ATM,SOS2,EIF2S3,EIF2S3,EIF5,PIK3R6,INSR   |
| <b>Antigen presentation</b>                          |       |                 |                  |                                                                      |
| ALLOGRAFT_REJECTION_SIGNALING                        | 0.175 | 0.00619         | 0.192            | IGHG1,HLA-DRB4,HLA-DQA1,IGHG2,CD40,HLA-DOB,HLA-DQB1,HLA-DRB1,HLA     |
| DENDRITIC_CELL_MATURATION                            | 0.132 | 0.00687         | 0.196            | IGHG1,MAPK14,HLA-DRB4,HLA-DQA1,IGHG2,PIK3R3,CD40,HLA-DOB,HLA-DQB     |
| AUTOIMMUNE_THYROID_DISEASE_SIGNALING                 | 0.170 | 0.0152          | 0.354            | IGHG1,HLA-DQA1,IGHG2,CD40,HLA-DOB,HLA-DQB1,HLA-DRB1,FCER1G,HLA-I     |
| OX40_SIGNALING_PATHWAY                               | 0.156 | 0.0189          | 0.370            | HLA-DRB4,TRAF5,HLA-DQA1,HLA-DOB,HLA-DQB1,HLA-DRB1,HLA-DRB3,FCER      |
| CYTOTOXIC_T_LYMPHOCYTE-MEDIATED_APOPTOSIS_OF_TARGE   | 0.155 | 0.0264          | 0.377            | HLA-DRB4,HLA-DQA1,HLA-DOB,HLA-DQB1,HLA-DRB1,HLA-DRB3,FCER1G,BCL      |
| ANTIGEN_PRESENTATION_PATHWAY                         | 0.159 | 0.0422          | 0.409            | HLA-DRB4,HLA-DQA1,HLA-DOB,HLA-DRB1,HLA-DRB3,HLA-A,HLA-L              |
| <b>G-protein coupled receptor signaling</b>          |       |                 |                  |                                                                      |
| G_PROTEIN_SIGNALING_MEDIATED_BY_TUBBY                | 0.174 | 0.0189          | 0.370            | PLCB3,GNA14,GNNG13,GNNG7,GNA11,GNNG4,GNA11,INSR                      |
| CCR3_SIGNALING_IN_EOSINOPHILS                        | 0.125 | 0.0275          | 0.377            | MAPK14,PLCB3,GNA14,PIK3R3,RRAS2,GNNG13,GNNG7,PAK3,ATM,ITPR1,ROCK2    |
| P2Y_PURINERGIC_RECEPTOR_SIGNALING_PATHWAY            | 0.126 | 0.0301          | 0.386            | PLCB3,ITGB3,P2RY2,PRKACB,PIK3R3,RRAS2,GNNG13,GNNG7,ADCY9,ATM,PLCE    |
| FMLP_SIGNALING_IN_NEUTROPHILS                        | 0.122 | 0.0389          | 0.409            | PLCB3,GNA14,PIK3R3,RRAS2,GNNG13,GNNG7,ATM,ITPR1,NOX1,CYBB,GNA11,PI   |
| IL-1_SIGNALING                                       | 0.126 | 0.0485          | 0.409            | MAPK14,GNA14,MAP2K6,PRKACB,GNNG13,GNNG7,ADCY9,TAB2,GNA11,GNNG4,GI    |
| <b>Others</b>                                        |       |                 |                  |                                                                      |
| ROLE_OF_NFAT_IN_REGULATION_OF_THE_IMMUNE_RESPONSE    | 0.162 | 2.46E-05        | 0.00457          | IGHG1,BLNK,KPNAB,PLCB3,GNA14,CD79B,HLA-DQA1,PIK3R3,RRAS2,IGHM,GN     |
| PRIMARY_IMMUNODEFICIENCY_SIGNALING                   | 0.255 | 0.000118        | 0.0147           | IGHG1,BLNK,IGHG2,CD40,IGHM,DCLRE1C,CD79A,IGHD,IGLC1,IL7R,TNFRSF13    |
| IL-8_SIGNALING                                       | 0.146 | 0.000499        | 0.0464           | DEFA1,DEFA1B,DEFA3,FIGF,GNA14,AZU1,PIK3R3,RRAS2,GNNG13,VEGFC,GNNG    |
| IL-4_SIGNALING                                       | 0.186 | 0.00171         | 0.106            | HLA-DQA1,PIK3R3,RRAS2,INPP1,HLA-DOB,HLA-DQB1,ATM,FCER2,HLA-DRB1      |
| PI3K_SIGNALING_IN_B_LYMPHOCYTES                      | 0.148 | 0.00219         | 0.109            | IGHG1,BLNK,PLCB3,CD79B,RRAS2,CD40,MALT1,IGHM,PIK3AP1,BLK,ITPR1,CD    |
| INTERFERON_SIGNALING                                 | 0.242 | 0.00235         | 0.109            | IRF9,MED14,STAT1,MX1,BCL2,BAK1,IFIT3,OAS1                            |
| DNA_DOUBLE-STRAND_BREAK_REPAIR_BY_HOMOLOGOUS_REC     | 0.333 | 0.00360         | 0.149            | MRE11A,ATR,ATM,RAD51,POLA1                                           |
| SYSTEMIC_LUPUS_ERYTHEMATOSUS_SIGNALING               | 0.146 | 0.00409         | 0.151            | IGHG1,CD22,CD79B,IGHG2,PIK3R3,RRAS2,CD40,IGHM,TNFSF13B,ATM,CD79A     |
| RENAL_CELL_CARCINOMA_SIGNALING                       | 0.174 | 0.00447         | 0.151            | HGF,GAB1,PIK3R3,RRAS2,VHL,PAK3,ATM,SOS2,PDGFB,PIK3R6,EGFR,PIK3R6,MET |
| MACROPHOCYTOXIS_SIGNALING                            | 0.159 | 0.0123          | 0.304            | HGF,ITGB3,PIK3R3,RRAS2,CD14,ATM,PDGFB,EGF,PIK3R6,MET,PRKDI           |
| CD40_SIGNALING                                       | 0.156 | 0.0189          | 0.370            | MAPK14,TRAF5,MAP2K6,PIK3R3,CD40,ATM,FCER2,PIK3R6,ATF1,IKBK           |
| FGF_SIGNALING                                        | 0.143 | 0.0209          | 0.377            | HGF,MAPK14,GAB1,MAP2K6,PIK3R3,ATM,ITPR1,SOS2,FGF18,PIK3R6,FGF1,ME    |
| B_CELL_RECEPTOR_SIGNALING                            | 0.123 | 0.0228          | 0.377            | BLNK,CD22,MAPK14,CD79B,GAB1,MAP2K6,PIK3R3,RRAS2,MALT1,PIK3AP1,INF    |
| ROLE_OF_TISSUE_FACTOR_IN_CANCER                      | 0.132 | 0.0248          | 0.377            | MAPK14,ITGB3,GNA14,PIK3R3,RRAS2,VEGFC,BLK,ATM,FGA,GNA11,PIK3R6,FC    |
| MYC_MEDIATED_APOPTOSIS_SIGNALING                     | 0.155 | 0.0264          | 0.377            | PIK3R3,RRAS2,ATM,YWHAQ,YWHAQ,SOS2,BCL2,IGF1R,PIK3R6                  |
| RAN_SIGNALING                                        | 0.250 | 0.0270          | 0.377            | KPNAB,TNPO1,XPO1,KPNB1                                               |
| GLUCOCORTICOID_RECEPTOR_SIGNALING                    | 0.107 | 0.0277          | 0.377            | HSPA1B,POMC,MAPK14,PRKACB,PIK3R3,RRAS2,AR,ATM,PTGES3,MED14,STA       |
| PI3K_AKT_SIGNALING                                   | 0.122 | 0.0284          | 0.377            | ITGB3,GAB1,PIK3R3,RRAS2,INPP1,YWHAQ,YWHAQ,ITGA9,SOS2,FOXO1,BCL       |
| FOGAMMARIB_SIGNALING_IN_B_LYMPHOCYTES                | 0.139 | 0.0312          | 0.387            | IGHG1,BLNK,CD79B,PIK3R3,RRAS2,IGHM,ATM,ITPR1,CD79A,FCGR2B,PIK3R6     |
| COLORECTAL_CANCER_METASTASIS_SIGNALING               | 0.108 | 0.0324          | 0.388            | FIGF,GNA14,PRKACB,PIK3R3,RRAS2,GNNG13,VEGFC,GNNG7,ADCY9,ATM,MMP1     |
| HIF1ALPHA_SIGNALING                                  | 0.129 | 0.0360          | 0.409            | MAPK14,FIGF,PIK3R3,RRAS2,VEGFC,VHL,ATM,MMP19,LDHB,MMP11,PIK3R6,E     |
| ENDOMETRIAL_CANCER_SIGNALING                         | 0.154 | 0.0369          | 0.409            | PIK3R3,RRAS2,ATM,LEF1,SOS2,CTNNA1,PIK3R6,ERBB2                       |
| PTGSBK_SIGNALING                                     | 0.122 | 0.0389          | 0.409            | IGHG1,PLCB3,CD79B,PIK3R3,RRAS2,IGHM,ATM,CD79A,YWHAQ,YWHAQ,SOS2       |
| CELL_CYCLE_G2_M_DNA_DAMAGE_CHECKPOINT_REGULATION     | 0.156 | 0.0469          | 0.409            | ATM,CCNB2,TOP2A,YWHAQ,YWHAQ,SKP1,LOC278622                           |
| PPARALPHA_RXRALPHA_ACTIVATION                        | 0.113 | 0.0478          | 0.409            | MAPK14,PLCB3,GPD2,MAP2K6,PRKACB,RRAS2,ADCY9,SOS2,PLCE1,SMAD3,F       |

Legend

Genes induced in HBV vaccine responders compared to poor-responders  
 Genes repressed in HBV vaccine responders compared to poor-responders

List of 40 pathways from the Ingenuity canonical pathway database significantly enriched among genes differentially expressed between HBV vaccine responders and poor-responders (Fisher's exact test;  $p \leq 0.05$ ).  
 The list of differentially expressed genes overlapping each pathway is given. Pathways that overlap in terms of genes (Jaccard index  $\geq 0.25$ ) were regrouped and can be thought as implicated in a common biological function. Genes induced in HBV vaccine responders are indicated in red and genes repressed in HBV vaccine responders are indicated in blue.

**Supplementary Table 5a. List of FCM markers measured on the EM131 cohort**

| Panel Name | Column Label                                         | Cell Surface Marker                                                   |
|------------|------------------------------------------------------|-----------------------------------------------------------------------|
| T cell     | CT CD3                                               | CD3+                                                                  |
| T cell     | CT CD4                                               | CD3+, CD4+                                                            |
| T cell     | CT CD8                                               | CD3+, CD8+                                                            |
| T cell     | CT DP                                                | CD3+, CD4+, CD8+                                                      |
| T cell     | CT DN                                                | CD3+, CD4-, CD8-                                                      |
| T cell     | CT DR+ B                                             | CD3-, CD19+, HLADR+                                                   |
| T cell     | CT DR- B                                             | CD3-, CD19+, HLADR-                                                   |
| T cell     | CT Mono                                              | CD3-, CD4-, CD19-, CD14+                                              |
| T cell     | CT pDC                                               | CD3-, CD4+, CD19-, CD14-, CD16-, CD56-, CD11c+, HLADR+, CD303+        |
| T cell     | CT mDC1                                              | CD3-, CD4+, CD19-, CD14-, CD16-, CD56-, CD11c+, HLADR+, CD1c+, CD303- |
| T cell     | CT mDC2                                              | CD3-, CD4+, CD19-, CD14-, CD16-, CD56-, CD11c+, HLADR+, CD141+        |
| T cell     | CT ALL NK                                            | CD3-, CD4-, CD19-, CD14-                                              |
| T cell     | CT 56-16+ NK                                         | CD3-, CD4-, CD19-, CD14-, CD16+, CD56-                                |
| T cell     | CT NK 56bright16-                                    | CD3-, CD4-, CD19-, CD14-, CD16-, CD56++                               |
| T cell     | CT NK 56low16-                                       | CD56, CD16                                                            |
| T cell     | CT NK 56low16+                                       | CD56, CD16                                                            |
| T cell     | CT NK 56bright16low                                  | CD56, CD16                                                            |
| T-cell     | PCT CD4 in CD3                                       | CD3+, CD4+                                                            |
| T-cell     | PCT CD8 in CD3                                       | CD3+, CD8+                                                            |
| T-cell     | PCT CD28- in CD8                                     | CD3+, CD28-                                                           |
| T-cell     | PCT CD62L+ in CD8                                    | CD3+, CD8+, CD62L+                                                    |
| T-cell     | PCT HLADR+CD38+ in CD4                               | CD3+, CD4+, CD38+, HLADR+                                             |
| T-cell     | PCT HLADR+CD38+ in CD8                               | CD3+, CD8+, CD38+, HLADR+                                             |
| T-cell     | PCT PD1+ in CD4                                      | CD3+, CD4+, PD1+                                                      |
| T-cell     | PCT PD1+ in CD8                                      | CD3+, CD8+, PD1+                                                      |
| T-cell     | PCT CD57+ in CD4                                     | CD3+, CD4+, CD57+                                                     |
| T-cell     | PCT CD57+ in CD8                                     | CD3+, CD8+, CD57+                                                     |
| T-cell     | PCT Naive in CD4                                     | CD3+, CD4+, CD45RA+, CD27+, CCR7+                                     |
| T-cell     | PCT CM in CD4                                        | CD3+, CD4+, CD45RA-, CD27+, CCR7+                                     |
| T-cell     | PCT EM in CD4                                        | CD3+, CD4+, CD45RA-, CD27-, CCR7-                                     |
| T-cell     | PCT TEM1 in CD4                                      | CD3+, CD4+, CD45RA-, CD27-, CCR7-, CD28+                              |
| T-cell     | PCT TEM2 in CD4                                      | CD3+, CD4+, CD45RA-, CD27-, CCR7-, CD28-                              |
| T-cell     | PCT ILD in CD4                                       | CD3+, CD4+, CD45RA+, CD27-, CCR7+                                     |
| T-cell     | PCT LD in CD4                                        | CD3+, CD4+, CD45RA+, CD27-, CCR7-                                     |
| T-cell     | PCT Naive in CD8                                     | CD3+, CD8+, CD45RA+, CD27+, CCR7+                                     |
| T-cell     | PCT CM in CD8                                        | CD3+, CD8+, CD45RA-, CD27+, CCR7+                                     |
| T-cell     | PCT EM in CD8                                        | CD3+, CD8+, CD45RA-, CD27-, CCR7-                                     |
| T-cell     | PCT TEM1 in CD8                                      | CD3+, CD8+, CD45RA-, CD27-, CCR7-, CD28+                              |
| T-cell     | PCT TEM2 in CD8                                      | CD3+, CD8+, CD45RA-, CD27-, CCR7-, CD28-                              |
| T-cell     | PCT ILD in CD8                                       | CD3+, CD8+, CD45RA+, CD27-, CCR7+                                     |
| T-cell     | PCT LD in CD8                                        | CD3+, CD8+, CD45RA+, CD27-, CCR7-                                     |
| T-cell     | PCT CD28+CD62L+Naive in CD4                          | CD3+, CD4+, CD45RA+, CD27+, CCR7+, CD28+, CD62L+                      |
| T-cell     | PCT CD28+CD62L+Naive in CD8                          | CD3+, CD8+, CD45RA+, CD27+, CCR7+, CD28+, CD62L+                      |
| T-cell     | PCT CD28+CD62L+CM in CD4                             | CD3+, CD4+, CD45RA-, CD27+, CCR7+, CD28+, CD62L+                      |
| T-cell     | PCT CD28+CD62L+CM in CD8                             | CD3+, CD8+, CD45RA-, CD27+, CCR7+, CD28+, CD62L+                      |
| T-cell     | PCT CD45RA- in CD4                                   | CD3+, CD4+, CD45RA-                                                   |
| T-cell     | PCT CD45RA- in CD8                                   | CD3+, CD8+, CD45RA-                                                   |
| T-cell     | RATIO CD4 to CD8                                     | ratio of respective categories above                                  |
| T-cell     | RATIO CD28+CD62L+Naive to CD45RA- in CD4             | ratio of respective categories above                                  |
| T-cell     | RATIO CD28+CD62L+Naive to CD45RA- in CD8             | ratio of respective categories above                                  |
| T-cell     | PCT RATIO CD28+CD62L+CM to CD45RA-andILDandLD in CD4 | ratio of respective categories above                                  |
| T-cell     | PCT RATIO CD28+CD62L+CM to CD45RA-andILDandLD in CD8 | ratio of respective categories above                                  |
| B-cell     | PCT CD3+ T cells in Lymphocytes                      | CD3+                                                                  |
| B-cell     | PCT DR+ B cells in Lymphocytes                       | CD3-, CD19+, HLADR+                                                   |
| B-cell     | PCT DR- B cells in Lymphocytes                       | CD3-, CD19+, HLADR-                                                   |
| B-cell     | PCT switched IgG+ memory B cells                     | CD3-, CD19+, HLADR+, CD27+, IgG+                                      |
| B-cell     | PCT switched IgA+ MK memory B cells                  | CD3-, CD19+, HLADR+, CD27+, IgA+                                      |
| B-cell     | PCT unswitched IgM+ MK memory B cells                | CD3-, CD19+, HLADR+, CD27+, IgM+                                      |
| B-cell     | PCT MZ like B cells                                  | CD3-, CD19+, HLADR+, CD27+,B220+                                      |
| B-cell     | PCT immature B cells                                 | CD3-, CD19+, HLADR+, CD27-, CD10+, IgM+, IgD-                         |
| B-cell     | PCT IgM-IgD+ naive B cells                           | CD3-, CD19+, HLADR+, CD27-, CD10-, CD20-, IgM-, IgD+                  |
| B-cell     | PCT IgM+IgD+ naive B cells                           | CD3-, CD19+, HLADR+, CD27-, CD10-, CD20-, IgM+, IgD+                  |
| B-cell     | PCT IgM+IgD- naive B cells                           | CD3-, CD19+, HLADR+, CD27-, CD10-, CD20-, IgM+, IgD-                  |
| B-cell     | PCT IgA+ memory B cells                              | CD3-, CD19+, HLADR+, CD27+, CD10-, CD20+, IgA+                        |
| B-cell     | PCT IgG+ memory B cells                              | CD3-, CD19+, HLADR+, CD27+, CD10-, CD20+, IgG+                        |
| B-cell     | PCT IgM+IgD+ memory B cells                          | CD3-, CD19+, HLADR+, CD27+, CD10-, CD20+, IgM+, IgD+                  |
| B-cell     | PCT IgM+IgD- memory B cells                          | CD3-, CD19+, HLADR+, CD27+, CD10-, CD20+, IgM+, IgD-                  |
| B-cell     | PCT IgM-IgD+ memory B cells                          | CD3-, CD19+, HLADR+, CD27+, CD10-, CD20+, IgM-, IgD+                  |
| B-cell     | PCT plasma B cells                                   | CD3-, CD19+, HLADR+, CD27+, CD10-, CD20-                              |
| B-cell     | PCT IgA+ plasma B cells                              | CD3-, CD19+, HLADR+, CD27+, CD10-, CD20-, IgA+                        |
| B-cell     | PCT IgD+ plasma B cells                              | CD3-, CD19+, HLADR+, CD27+, CD10-, CD20-, IgD+                        |
| B-cell     | PCT IgG+ plasma B cells                              | CD3-, CD19+, HLADR+, CD27+, CD10-, CD20-, IgG+                        |

|        |                             |                                                           |
|--------|-----------------------------|-----------------------------------------------------------|
| B-cell | PCT IgM+ plasma B cells     | CD3-, CD19+, HLADR+, CD27+, CD10-, CD20-, IgM+            |
| Innate | PCT CD4 in WBC              | CD3+, CD4+                                                |
| Innate | PCT Mono in WBC             | CD3-, CD4-, CD19-, CD14+                                  |
| Innate | PCT CD16+ in Mono           | CD3-, CD4-, CD19-, CD14+, CD16+                           |
| Innate | PCT NK 56-16+ in WBC        | CD3-, CD4-, CD19-, CD14-, CD16+, CD56-                    |
| Innate | PCT NK 56bright16- in WBC   | CD3-, CD4-, CD19-, CD14-, CD16-, CD56+                    |
| Innate | PCT NK 56low16- in WBC      | CD3-, CD4-, CD19-, CD14-, CD16-, CD56lo                   |
| Innate | PCT NK 56low16+ in WBC      | CD3-, CD4-, CD19-, CD14-, CD16+, CD56lo                   |
| Innate | PCT NK 56bright16low in WBC | CD3-, CD4-, CD19-, CD14-, CD16lo, CD56++                  |
| Innate | PCT pDC in WBC              | CD3-,CD4+CD19-,CD14-CD16-,CD56-CD11c-,HLADR+,CD303+       |
| Innate | PCT mDC1 in WBC             | CD3-,CD4+CD19-,CD14-CD16-,CD56-CD11c+,HLADR+,CD1c+,CD303- |
| Innate | PCT mDC2 in WBC             | CD3-,CD4+CD19-,CD14-CD16-,CD56-CD11c+,HLADR+,CD141+       |
| Innate | PCT DRhi40+ in pDC          | HLADR, CD40                                               |
| Innate | PCT DRhi40+ in mDC1         | HLADR, CD40                                               |
| Innate | PCT DRhi40+ in mDC2         | HLADR, CD40                                               |
| Innate | MdFI DR in pDC              | HLADR                                                     |
| Innate | MdFI CD4 in pDC             | CD4                                                       |
| Innate | MdFI CD40 in pDC            | CD40                                                      |
| Innate | MdFI DR in mDC1             | HLADR                                                     |
| Innate | MdFI CD4 in mDC1            | CD4                                                       |
| Innate | MdFI CD40 in mDC1           | CD40                                                      |
| Innate | MdFI DR in mDC2             | HLADR                                                     |
| Innate | MdFI CD4 in mDC2            | CD4                                                       |
| Innate | MdFI CD40 in mDC2           | CD40                                                      |

FCM panel are colored differently; blue was used for T-cells, orange for B-cells and green for innate cells.

**Supplementary Table 5b. List of chemokines and cytokines measured on the EM131 cohort**

---

**Name**

---

Alpha-1-Antitrypsin (AAT)  
Alpha-2-Macroglobulin (A2Macro)  
Beta-2-Microglobulin (B2M)  
Brain-Derived Neurotrophic Factor (BDNF)  
C-Reactive Protein (CRP)  
Complement C3 (C3)  
Eotaxin-1  
Factor VII  
Ferritin (FRTN)  
Fibrinogen  
Granulocyte-Macrophage Colony-Stimulating Factor (GM-CSF)  
Haptoglobin  
Intercellular Adhesion Molecule 1 (ICAM-1)  
Interferon gamma (IFN-gamma)  
Interleukin-1 alpha (IL-1 alpha)  
Interleukin-1 beta (IL-1 beta)  
Interleukin-1 receptor antagonist (IL-1ra)  
Interleukin-10 (IL-10)  
Interleukin-12 Subunit p40 (IL-12p40)  
Interleukin-12 Subunit p70 (IL-12p70)  
Interleukin-15 (IL-15)  
Interleukin-17 (IL-17)  
Interleukin-18 (IL-18)  
Interleukin-2 (IL-2)  
Interleukin-23 (IL-23)  
Interleukin-3 (IL-3)  
Interleukin-4 (IL-4)  
Interleukin-5 (IL-5)  
Interleukin-6 (IL-6)  
Interleukin-7 (IL-7)  
Interleukin-8 (IL-8)  
Macrophage Inflammatory Protein-1 alpha (MIP-1 alpha)  
Macrophage Inflammatory Protein-1 beta (MIP-1 beta)  
Matrix Metalloproteinase-2 (MMP-2)  
Matrix Metalloproteinase-3 (MMP-3)  
Matrix Metalloproteinase-9 (MMP-9)  
Monocyte Chemotactic Protein 1 (MCP-1)  
Stem Cell Factor (SCF)  
T-Cell-Specific Protein RANTES (RANTES)  
Tissue Inhibitor of Metalloproteinases 1 (TIMP-1)  
Tumor Necrosis Factor alpha (TNF-alpha)  
Tumor Necrosis Factor beta (TNF-beta)  
Tumor Necrosis Factor Receptor 2 (TNFR2)  
Vascular Cell Adhesion Molecule-1 (VCAM-1)  
Vascular Endothelial Growth Factor (VEGF)  
Vitamin D-Binding Protein (VDBP)  
von Willebrand Factor (vWF)

---

**Supplementary Table 5c. Identification of cytokines/chemokines markers associated with response to HBV vaccine on the EM131 training set**

| Cytokine marker                            | Univariate logistic regression |               |         | Multivariate logistic regression |               |         |
|--------------------------------------------|--------------------------------|---------------|---------|----------------------------------|---------------|---------|
|                                            | OR                             | 95% CI        | p-value | OR                               | 95% CI        | p-value |
| Beta-2-Microglobulin (B2M)                 | 1.56                           | [1.04, 2.46]  | 0.0397  | 0.938                            | [0.486, 1.79] | 0.845   |
| Interleukin-15 (IL-15)                     | 2.15                           | [0.986, 5.27] | 0.0702  | 1.14                             | [0.361, 3.56] | 0.824   |
| Interleukin-1 receptor antagonist (IL-1ra) | 2.10                           | [0.925, 5.43] | 0.0979  | 2.09                             | [0.652, 8.06] | 0.244   |
| Stem Cell Factor (SCF)                     | 1.79                           | [1.01, 3.30]  | 0.0517  | 1.28                             | [0.570, 2.91] | 0.548   |
| Tumor Necrosis Factor Receptor 2 (TNFR2)   | 1.61                           | [1.07, 2.60]  | 0.0362  | 1.34                             | [0.653, 2.91] | 0.440   |
| Vascular Cell Adhesion Molecule-1 (VCAM-1) | 1.47                           | [0.976, 2.36] | 0.0839  | 1.07                             | [0.551, 2.16] | 0.841   |
| Vascular Endothelial Growth Factor (VEGF)  | 1.60                           | [1.01, 2.63]  | 0.0521  | 1.12                             | [0.636, 2.00] | 0.697   |

Univariate and multivariate logistic regression between cytokines/chemokines marker levels pre-vaccination (Visit 2) and response to HBV vaccine in the EM131 training set. P-values of a normality test (z-test) testing the statistical significance of the association (null hypothesis: OR=1) are given in the table. Markers selected using the forward selection method based on AIC criteria (in grey) were combined in multivariate models.
